# Supplementary material for: Enantio- and diastereoselective palladium catalysed arylative and vinylative allene carbocyclisation cascades
Source: Royal Society of Chemistry journal article supplement (doi:10.1039/c3cc42079e), 2013-01-01
Supplement: c3cc42079e.pdf [file c3cc42079e.pdf]

Electronic Supplementary Information

**Enantio- and diastereoselective palladium catalysed arylation  
and vinylative allene carbocyclisation cascades**

Meiling Li,<sup>a</sup> Alison Hawkins,<sup>a</sup> David M. Barber,<sup>a</sup> Patrick Bultinck,<sup>b</sup>  
Wouter Herrebout<sup>c</sup> and Darren J. Dixon\*<sup>a</sup>

<sup>a</sup> *Department of Chemistry, Chemistry Research Laboratory, University of Oxford,  
12 Mansfield Road, Oxford, OX1 3TA, U.K.  
darren.dixon@chem.ox.ac.uk*

<sup>b</sup> *Department of Inorganic and Physical Chemistry, Ghent University, Krijgslaan 281-  
S3, 9000 Gent, Belgium*

<sup>c</sup> *Department of Chemistry, University of Antwerp, Groenenborgerlaan 171,  
2020 Antwerp, Belgium*

## Contents

|                                                                                                         |            |
|---------------------------------------------------------------------------------------------------------|------------|
| <b>1. General experimental</b>                                                                          | <b>3</b>   |
| <b>2. Synthesis of aminoallenes 10</b>                                                                  | <b>5</b>   |
| <b>3. Synthesis of bis(oxazoline) ligands 3</b>                                                         | <b>6</b>   |
| <b>4. Synthesis of starting materials 1</b>                                                             | <b>8</b>   |
| <b>5. Synthesis of spirolactams 2 and 4</b>                                                             | <b>15</b>  |
| <b>6. Synthesis of diastereomer 4b'</b>                                                                 | <b>33</b>  |
| <b>7. References</b>                                                                                    | <b>34</b>  |
| <b>8. <sup>1</sup>H NMR spectra, <sup>13</sup>C NMR spectra and HPLC traces of spirolactams 2 and 4</b> | <b>35</b>  |
| <b>9. Relative stereochemistry assignment of 4b and 4b' using NOESY analysis</b>                        | <b>138</b> |
| <b>10. Determination of the Absolute Configuration of 4b using VCD</b>                                  | <b>142</b> |

## 1. General experimental

All reactions were performed without special precautions to avoid the presence of moisture unless otherwise stated. For reactions conducted under anhydrous conditions glassware was dried in an oven at 100 °C and carried out under a nitrogen atmosphere.

Bulk solutions were evaporated under reduced pressure using a Büchi rotary evaporator. Solvents used were dry solvents. Petroleum ether refers to distilled light petroleum of fraction 30 - 40 °C. Dimethyl sulfoxide was dried over molecular sieves. THF was distilled over sodium using benzophenone as an indicator of dryness. Toluene was distilled over CaH<sub>2</sub>. All other solvents were used as supplied without any further purification.

Commercial reagents were used as supplied without any further purification. Aminol alcohols were prepared according to literature procedures.<sup>[1]</sup> (*E*)-(2-iodovinyl)benzene,<sup>[2]</sup> (*Z*)-1-chloro-4-(2-iodovinyl)benzene,<sup>[3]</sup> (*Z*)-1-(2-iodovinyl)-4-methoxybenzene,<sup>[3]</sup> (*Z*)-methyl 4-(2-iodovinyl)benzoate,<sup>[3]</sup> (*Z*)-1-(2-iodovinyl)-3-nitrobenzene,<sup>[3]</sup> (*Z*)-2-(2-iodovinyl)furan,<sup>[3]</sup> (*Z*)-2-(2-iodovinyl)thiophene<sup>[3]</sup> were prepared according to the corresponding literature procedures.

Column chromatography was carried out using Merck Kieselgel 60 silica gel (230-400 mesh). All reactions were followed by thin-layer chromatography (TLC) where practical, using Merck Kieselgel 60 F<sub>254</sub> (230-400 mesh) fluorescent treated silica which were visualised under UV light (254 nm) or by staining with aqueous basic potassium permanganate solutions as appropriate.

All <sup>1</sup>H and <sup>13</sup>C NMR spectra were recorded using a Bruker 500 MHz and Bruker 400 MHz spectrometers with residual protic solvents used as the internal standard. Unless otherwise stated all experiments were carried out using CDCl<sub>3</sub> and *d*<sub>6</sub>-DMSO as the solvent. Chemical shifts ( $\delta$ ) are given in parts per million (ppm) and coupling constants (*J*) are given in Hertz (Hz). The <sup>1</sup>H NMR spectra are reported as follows:  $\delta$ /ppm (multiplicity (s = singlet, d = doublet, t = triplet, q = quartet, qu = quintet, m = multiplet), number of protons, coupling constants *J*/Hz (where appropriate)). The NMR spectra are reported as how the spectra are observed and do not take into account the theoretical NMR splitting. DEPT 135, and two-dimensional (COSY, HMQC, HMBC) NMR spectroscopy was used where appropriate to assist the assignment of signals in the <sup>1</sup>H and <sup>13</sup>C NMR spectra. IR spectra were recorded on an ATI Mattson: Genesis Series FT-IR spectrometer or a Bruker Tensor 27 FT-IR spectrometer, from a thin film deposited on a sodium chloride plate. Only selected maximum absorbances are reported. Low resolution mass spectrometry (ESI) was recorded on a Fissions VG Trio 2000 quadrupole mass spectrometer or a Waters LCT premier XE mass spectrometer. High resolution mass spectra (accurate mass) were recorded on a Thermo Finnigan Mat 95XP mass spectrometer or a Bruker MicroTof mass spectrometer (electrospray technique). Melting points were recorded on a Leica Galen III apparatus, at ambient pressure and are uncorrected. Enantiomeric excesses were determined using high performance liquid chromatography (HPLC) performed on a Hewlett-Packard Series 1050 series system (column and

eluent conditions are given with the compounds). Optical rotations were recorded using a Perkin-Elmer 241 polarimeter; Specific rotation (SR) ( $[\alpha]_D$ ) are reported in  $10^{-1} \text{ deg cm}^2 \text{ g}^{-1}$ ; concentrations ( $c$ ) are quoted in g/100 mL;  $D$  refers to the D-line of sodium (589 nm); temperatures ( $T$ ) are given in degrees Celsius ( $^{\circ}\text{C}$ ).

## 2. Synthesis of aminoallenes 10

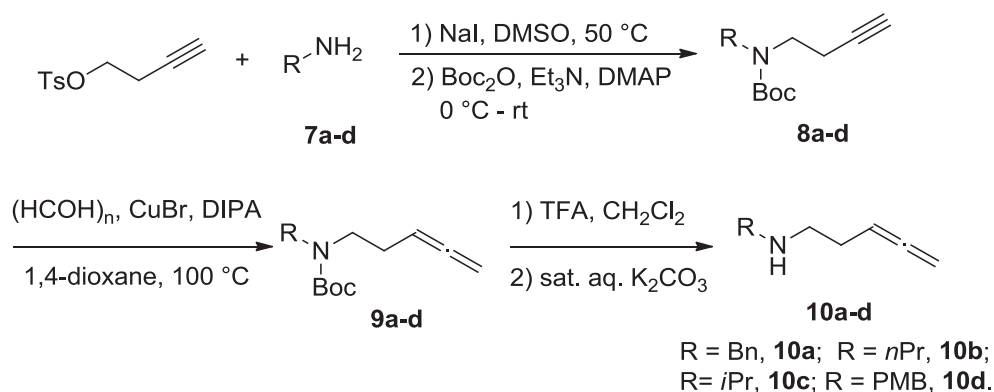

### General procedure for the synthesis of Boc-protected amines **8**

Amine **7a-d** (2.0 equiv) and sodium iodide (2.5 mol%) were added to a solution of but-3-yn-1-yl 4-methylbenzenesulfonate (1.0 equiv) in DMSO. After being stirred for 40 h at 45 °C, the reaction mixture was poured into 2 % aq. NaOH and extracted with Et<sub>2</sub>O (×3). The organic phase was washed with brine, dried over Na<sub>2</sub>SO<sub>4</sub>, filtered and concentrated under reduced pressure. The resulting residue was dissolved in CH<sub>2</sub>Cl<sub>2</sub>. Di-*tert*-butyl dicarbonate (2.0 equiv), Et<sub>3</sub>N (2.0 equiv) and DMAP (3.0 mol%) were added at 0 °C. The reaction mixture was stirred at ambient temperature for 16 h and was then poured into water. The reaction mixture was separated, and extracted with CH<sub>2</sub>Cl<sub>2</sub> (×2). The combined organic layers were washed with brine, dried over Na<sub>2</sub>SO<sub>4</sub>, filtered and concentrated. The resulting residue was subjected to column chromatography (PE/Et<sub>2</sub>O) to afford the desired Boc-protected amine **8a-d**.<sup>[4]</sup>

### General procedure for the synthesis of Boc-protected allenes **9**

A solution of compound **8a-d** (1.0 equiv), cuprous bromide (0.5 equiv), paraformaldehyde (2.5 equiv) and DIPEA (2.0 equiv) in 1,4-dioxane (0.67 mmol/mL) was heated at reflux for 12 h. The reaction mixture cooled to room temperature, diluted with water and Et<sub>2</sub>O and then acidified with aqueous 1.0 N HCl until the mixture became clear. The organic layer was separated and the aqueous layer was further extracted with Et<sub>2</sub>O (×2). The combined organic extracts were washed with brine, dried over MgSO<sub>4</sub>, filtered and concentrated. The crude product was purified by flash column chromatography on silica gel (PE/Et<sub>2</sub>O) to afford the desired Boc-protected allene **9a-d**.<sup>[5]</sup>

### General procedure for the synthesis of amino allenes **10**

Boc-protected allene **9a-d** was stirred with TFA in CH<sub>2</sub>Cl<sub>2</sub> (1:1, v/v) and monitored by TLC. Upon completion, the reaction mixture was basified with saturated aqueous K<sub>2</sub>CO<sub>3</sub> to pH 8. The mixture was extracted with CH<sub>2</sub>Cl<sub>2</sub> (×3). The combined organic extracts were washed with brine, dried over Na<sub>2</sub>SO<sub>4</sub>, filtered and concentrated to afford the desired crude amino allene **10a-d**. The crude amino allenes **10** were used in the next step without further purification.<sup>[5]</sup>

### 3. Synthesis of bis(oxazoline) ligands **3**

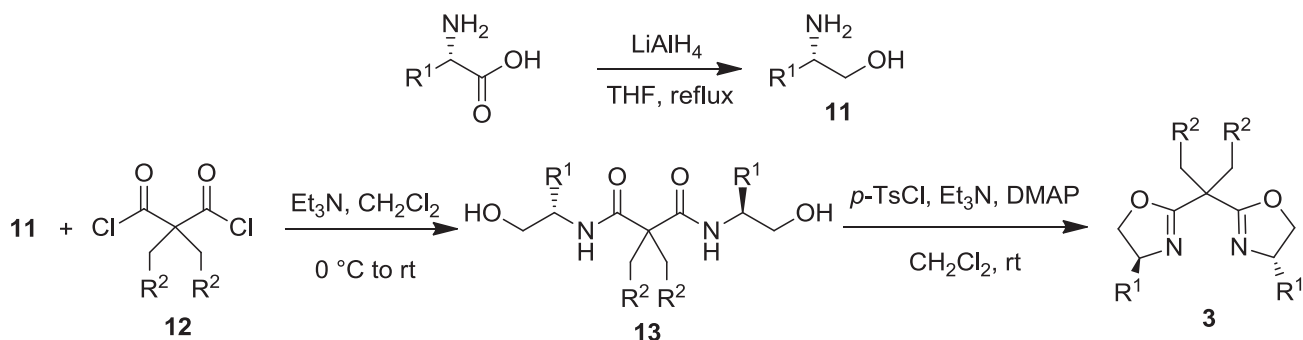

Bis(oxazoline) ligands **3c**, **3d**, **3e**, and **3f** are commercially available and were used as supplied. Bis(oxazoline) ligands **3g**, **3h** and **3i** were synthesised using the following procedures.

#### General procedure for the synthesis of aminols **11**

In a dry flask under nitrogen, LiAlH<sub>4</sub> (5.44 equiv) was suspended in THF (1.7 mL/mmol amino acid). The suspension was cooled to 0 °C and the amino acid (1.00 equiv) was added in small portions. Once all the amino acid was added, the suspension was stirred at 0 °C for 15 minutes and then allowed to warm to room temperature for 1 h. The flask was then mounted with a condenser and the mixture was refluxed for 16 h. The resulting suspension was then allowed to cool to room temperature and diluted with Et<sub>2</sub>O (1.5 mL/mmol of starting amino acid). The excess LiAlH<sub>4</sub> was quenched by slow addition of sodium sulfate decahydrate (100 mg/mmol of amino acid) and then the resulting mixture was stirred for 1 h at room temperature. The suspension was filtered through a pad of silica gel (which was eluted with EtOAc) and the filtrate was concentrated to afford the desired crude aminols **11**. The aminols **11** were used in the next step without further purification.<sup>[1,6]</sup>

#### General procedure for the synthesis of bis(amides) **13**

To an ice-cooled solution of aminols **11** (2.25 equiv) in CH<sub>2</sub>Cl<sub>2</sub> (1 mL/mmol **12**) was added Et<sub>3</sub>N (5.00 equiv) and a solution of malonyl dichloride **12** (1.00 equiv) in CH<sub>2</sub>Cl<sub>2</sub> (1 mL/mmol **12**) dropwise. The reaction mixture was warmed to room temperature, stirred for 2 h and then diluted with CH<sub>2</sub>Cl<sub>2</sub> (8 mL/mmol **12**). The organic layer was separated and then washed with aqueous 1.0 N HCl, saturated aqueous NaHCO<sub>3</sub> solution and brine. The organic layer was dried over Na<sub>2</sub>SO<sub>4</sub>, filtered and concentrated to afford the desired crude (*S,S*)-bis(amides) **13**. The (*S,S*)-bis(amides) **13** were used in the next step without further purification.<sup>[1,6]</sup>

#### General procedure for the synthesis of bis(oxazolines) **3**

To an ice-cooled solution of the (*S,S*)-bis(amides) **13** (1.0 equiv) and DMAP (0.1 equiv) in CH<sub>2</sub>Cl<sub>2</sub> (3.8 mL/mmol **13**) was added Et<sub>3</sub>N (6.0 equiv) and a solution of *p*-TsCl (2.0 equiv) in CH<sub>2</sub>Cl<sub>2</sub> (2 mL/mmol **13**). The cooling bath was then removed and the reaction was monitored by TLC analysis. Upon completion, the reaction was quenched by the addition of saturated aqueous NH<sub>4</sub>Cl solution. The organic layer was separated and the aqueous layer was further extracted with CH<sub>2</sub>Cl<sub>2</sub> (×3). The combined organic extracts were dried over Na<sub>2</sub>SO<sub>4</sub>, filtered and concentrated. Purification

by flash column chromatography on silica gel (PE/EtOAc) afforded the desired (*S,S*)-bis(oxazolines) **3**.<sup>[1,6]</sup>

### Synthesis and characterisation of (*4S,4'S*)-2,2'-pentane-3,3-diylbis[4-(propan-2-yl)-4,5-dihydro-1,3-oxazole] **3g**

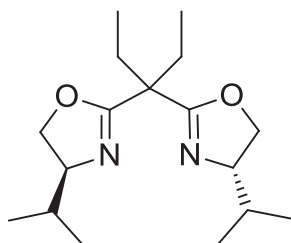

Synthesised on a 1.6 mmol scale of diethylmalonyl dichloride (314 mg). Purification by flash column chromatography on silica gel (PE/EtOAc 20:1 to 10:1) afforded **3g** (282 mg, 60% over two steps) as a colourless oil.

$[\alpha]_D^{25} = -108.0$  (*c* 1.75, CHCl<sub>3</sub>); <sup>1</sup>H NMR (400 MHz, CDCl<sub>3</sub>)  $\delta_H$  4.11-4.19 (m, 2H), 3.89-3.98 (m, 4H), 1.89-2.08 (m, 4H), 1.76-1.87 (m, 2H), 0.91 (d, 6H, *J* = 6.8 Hz), 0.80-0.88 (m, 12H); <sup>13</sup>C NMR (100 MHz, CDCl<sub>3</sub>)  $\delta_C$  167.7 (2C), 71.9 (2C), 69.5 (2C), 46.6, 32.3 (2C), 25.2 (2C), 18.7, 17.6, 8.3 (2C). The data was in agreement with that previously reported in the literature.<sup>[6]</sup>

### Synthesis and characterisation of (*4S,4'S*)-2,2'-pentane-3,3-diylbis(4-*tert*-butyl-4,5-dihydro-1,3-oxazole) **3h**

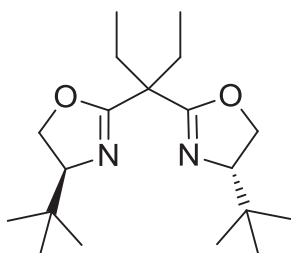

Synthesised on a 0.80 mmol scale of diethylmalonyl dichloride (157 mg). Purification by flash column chromatography on silica gel (PE/EtOAc 20:1 to 10:1) afforded **3h** (122 mg, 50% over two steps) as a colourless solid.

$[\alpha]_D^{25} = -128.0$  (*c* 1.75, CHCl<sub>3</sub>); **Mp** 36 - 37 °C; <sup>1</sup>H NMR (400 MHz, CDCl<sub>3</sub>)  $\delta_H$  4.13 (dd, 2H, *J* = 10.1 Hz, *J* = 8.7 Hz), 4.03 (t, 2H, *J* = 8.4 Hz), 3.87 (dd, 2H, *J* = 10.1 Hz, *J* = 7.4 Hz), 2.02-2.11 (m, 2H), 1.88-1.97 (m, 2H), 0.83-0.88 (m, 24H); <sup>13</sup>C NMR (100 MHz, CDCl<sub>3</sub>)  $\delta_C$  167.2 (2C), 75.5 (2C), 68.4 (2C), 47.5, 33.8 (2C), 30.9 (2C), 25.8 (6C), 8.4 (2C). The data was in agreement with that previously reported in the literature.<sup>[6]</sup>

### Synthesis and characterisation of (*4S,4'S*)-2,2'-propane-2,2-diylbis{4-[(2*S*)-butan-2-yl]-4,5-dihydro-1,3-oxazole} **3i**

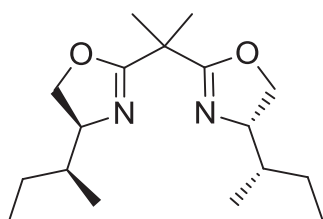

Synthesised on a 2.0 mmol scale of dimethylmalonyl dichloride (338 mg). Purification by flash column chromatography on silica gel (PE/EtOAc 20:1 to 10:1) afforded **3i** (282 mg, 41% over two steps) as a colourless oil.

$[\alpha]_D^{25} = -120.0$  (*c* 1.00, CHCl<sub>3</sub>); <sup>1</sup>H NMR (400 MHz, CDCl<sub>3</sub>)  $\delta_H$  4.17 (t, 2H, *J* = 7.6 Hz), 4.06-4.11 (m, 2H), 3.98 (t, 2H, *J* = 7.2 Hz), 1.63-1.69 (m, 2H), 1.50 (s, 6H), 1.36-1.47 (m, 2H), 1.09-1.20 (m, 2H), 0.90 (t, 6H, *J* = 7.2 Hz), 0.78 (d, 6H, *J* = 6.8 Hz); <sup>13</sup>C NMR (100 MHz, CDCl<sub>3</sub>)  $\delta_C$  168.7 (2C), 70.0 (2C), 69.3 (2C), 38.5 (2C), 26.0 (2C), 24.4, 13.6 (2C), 11.7 (2C); **FT-IR**  $\nu_{\max}$ (NaCl)/cm<sup>-1</sup> 2950 (C-H), 1660 (C=N); **MS** (ESI+) *m/z* (rel. intensity %) 317.24 (M+Na<sup>+</sup>, 100); **HRMS** (ESI+) calcd. for C<sub>17</sub>H<sub>30</sub>N<sub>2</sub>NaO<sub>2</sub> [M + Na]<sup>+</sup> 317.2205, found 317.2206.

## 4. Synthesis of starting materials 1

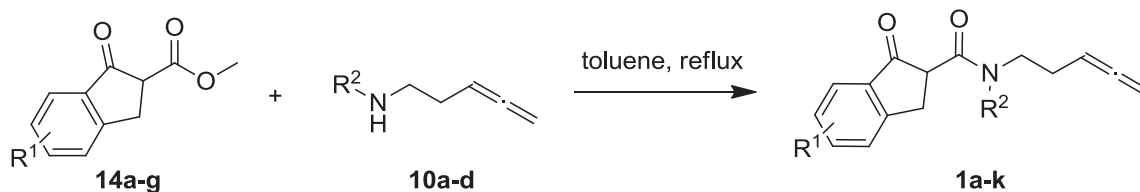

$R^1 = \text{H}$ , **14a**;  $R^1 = 6\text{-Me}$ , **14b**;  $R^1 = 6\text{-OMe}$ , **14c**;  $R^1 = 4\text{-CF}_3$ , **14d**;  
 $R^1 = 5\text{-F}$ , **14e**;  $R^1 = 5\text{-Br}$ , **14f**;  $R^1 = 5\text{-Cl}$ , **14g**.

The starting materials **1a-k** were prepared from the corresponding esters **14a-g** (1.0 equiv) and secondary amines **10a-d** (1.5 equiv) in toluene at reflux until the reaction was complete by TLC analysis. The reaction mixture was concentrated and the residue was purified by flash column chromatography on silica gel (PE/EtOAc) to afford the desired products **1a-k**.<sup>[5]</sup>

### Synthesis and characterisation of *N*-benzyl-1-oxo-*N*-(penta-3,4-dien-1-yl)indane-2-carboxamide **1a**

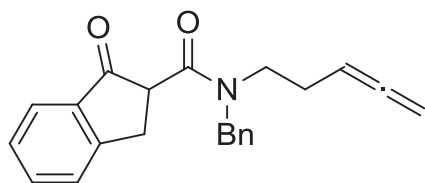

Synthesised from ethyl methyl 1-oxo-2,3-dihydro-1*H*-indene-2-carboxylate **14a** (950 mg, 5.00 mmol) and amine **10a** (1.30 g, 7.50 mmol) according to the general procedure. Compound **1a** was obtained as a yellow oil (1.49 g, 90%) after purification by flash column chromatography on silica gel (PE/EtOAc 1:2).

Two rotamers in a 1.6:1 ratio, <sup>1</sup>H NMR (400 MHz, *d*<sub>6</sub>-DMSO)  $\delta_{\text{H}}$  7.59-7.73 (m, both, 6H), 7.39-7.47 (m, both, 4H), 7.32-7.36 (m, both, 4H), 7.23-7.27 (m, both, 4H), 5.24 (qu, major, 1H,  $J = 6.9$  Hz), 5.12 (qu, minor, 1H,  $J = 6.8$  Hz), 5.03 (d, minor, 1H,  $J = 17.0$  Hz), 4.85 (d, major, 1H,  $J = 15.4$  Hz), 4.73-4.77 (m, both, 5H), 4.41 (dd, major, 1H,  $J = 7.6$  Hz,  $J = 3.9$  Hz), 4.37 (d, major, 1H,  $J = 15.5$  Hz), 4.30 (dd, minor, 1H,  $J = 7.8$  Hz,  $J = 3.6$  Hz), 3.83 (td, major, 1H,  $J = 15.3$  Hz,  $J = 7.7$  Hz), 3.43-3.47 (m, minor, 1H), 3.37-3.40 (m, major, 3H), 3.28-3.37 (m, minor, 2H), 3.15-3.24 (m, minor, 1H), 2.28-2.34 (m, major, 2H), 2.07-2.21 (m, minor, 2H); <sup>13</sup>C NMR (100 MHz, *d*<sub>6</sub>-DMSO)  $\delta_{\text{C}}$  209.1 (major), 209.0 (minor), 203.0 (both, 2C), 170.2 (minor), 169.9 (major), 155.8 (major), 155.5 (minor), 138.6 (major), 138.4 (minor), 136.2 (major), 136.1 (minor), 129.5 (both, 2C), 129.3 (both, 2C), 128.5 (both, 2C), 128.2 (both, 2C), 127.9 (both, 2C), 127.8 (both, 2C), 127.7 (both, 2C), 127.6 (both, 2C), 124.4 (both, 2C), 87.7 (minor), 87.4 (major), 76.4 (major), 76.3 (minor), 51.8 (minor), 50.9 (both, 2C), 48.7 (major), 46.0 (minor), 47.6 (major), 31.9 (both, 2C), 28.1 (major), 26.6 (minor); FT-IR  $\nu_{\text{max}}$ (NaCl)/cm<sup>-1</sup> 2927 (C-H), 1955 (C=C=C), 1710 (C=O), 1641 (NC=O); MS (ESI+)  $m/z$  (rel. intensity %) 354.17 (M + Na<sup>+</sup>, 100); HRMS (ESI+) calcd. for C<sub>22</sub>H<sub>21</sub>NNaO<sub>2</sub> [M + Na]<sup>+</sup> 354.1470, found 354.1462.



### Synthesis and characterisation of *N*-benzyl-6-methyl-1-oxo-*N*-(penta-3,4-dien-1-yl)indane-2-carboxamide **1b**

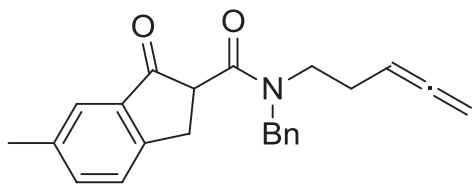

Synthesised from compound **14b** (1.02 g, 5.00 mmol) and amine **10a** (1.30 g, 7.50 mmol) according to the general procedure. Compound **1b** was obtained (1.60 g, 93%) as a yellow oil after purification by flash column chromatography on silica gel (PE/EtOAc 1:2).

Two rotamers in a 1.5:1 ratio,  $^1\text{H NMR}$  (400 MHz,  $d_6$ -DMSO)  $\delta_{\text{H}}$  7.25-7.52 (m, both, 16H), 5.24 (qu, major, 1H,  $J = 6.8$  Hz), 5.12 (qu, minor, 1H,  $J = 6.8$  Hz), 5.02 (d, minor, 1H,  $J = 17.0$  Hz), 4.84 (d, major, 1H,  $J = 15.4$  Hz), 4.71-4.77 (m, both, 5H), 4.34-4.40 (m, major, 2H), 4.27 (dd, minor, 1H,  $J = 7.8$  Hz,  $J = 3.6$  Hz), 3.83 (td, major, 1H,  $J = 15.3$  Hz,  $J = 7.7$  Hz), 3.41-3.49 (m, minor, 1H), 3.27-3.40 (m, both, 4H), 3.14-3.25 (m, minor, 2H), 2.37 (s, major, 3H), 2.36 (s, minor, 3H), 2.28-2.32 (m, major, 2H), 2.11-2.18 (m, minor, 2H);  $^{13}\text{C NMR}$  (100 MHz,  $d_6$ -DMSO)  $\delta_{\text{C}}$  209.1 (major), 209.0 (minor), 203.2 (major), 203.0 (minor), 170.2 (minor), 170.0 (major), 153.2 (major), 152.9 (minor), 138.7 (both, 2C), 138.0 (both, 2C), 137.3 (major), 137.2 (minor), 136.4 (minor), 136.3 (major), 129.5 (both, 2C), 129.2 (both, 2C), 128.2 (both, 2C), 127.9 (both, 2C), 127.8 (both, 2C), 127.3 (both, 2C), 124.2 (both, 2C), 87.7 (minor), 87.4 (major), 76.4 (major), 76.3 (minor), 51.8 (minor), 51.2 (both, 2C), 48.7 (major), 47.6 (major), 46.0 (minor), 31.5 (both, 2C), 28.1 (major), 26.6 (minor), 21.4 (both, 2C); **FT-IR**  $\nu_{\text{max}}$ (NaCl)/ $\text{cm}^{-1}$  2924 (C-H), 1955 (C=C=C), 1708 (C=O), 1642 (NC=O); **MS** (ESI+)  $m/z$  (rel. intensity %) 368.18 (M + Na<sup>+</sup>, 100); **HRMS** (ESI+) calcd. for C<sub>23</sub>H<sub>23</sub>NNaO<sub>2</sub> [M + Na]<sup>+</sup> 368.1621, found 368.1614.

### Synthesis and characterisation of *N*-benzyl-6-methoxy-1-oxo-*N*-(penta-3,4-dien-1-yl)indane-2-carboxamide **1c**

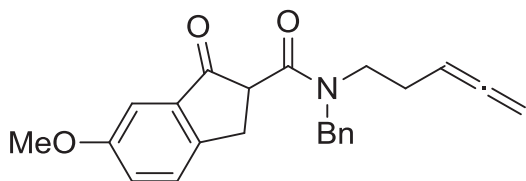

Synthesised from compound **14c** (1.02 g, 5.00 mmol) and amine **10a** (1.30 g, 7.50 mmol) according to the general procedure. Compound **1c** was obtained (1.51 g, 84%) as a yellow oil after purification by flash column chromatography on silica gel (PE/EtOAc 1:1).

Two rotamers in a 1.6:1 ratio,  $^1\text{H NMR}$  (400 MHz,  $d_6$ -DMSO)  $\delta_{\text{H}}$  7.50-7.52 (m, both, 2H), 7.40-7.42 (m, both, 2H), 7.25-7.35 (m, both, 10H), 7.10-7.13 (m, both, 2H), 5.24 (qu, major, 1H,  $J = 6.8$  Hz), 5.12 (qu, minor, 1H,  $J = 6.8$  Hz), 5.01 (d, minor, 1H,  $J = 17.0$  Hz), 4.85 (d, major, 1H,  $J = 15.4$  Hz), 4.73-4.77 (m, both, 5H), 4.42 (dd, major, 1H,  $J = 7.4$  Hz,  $J = 3.7$  Hz), 4.37 (d, major, 1H,  $J = 15.4$  Hz), 4.30 (dd, minor, 1H,  $J = 7.6$  Hz,  $J = 3.4$  Hz), 3.84-3.86 (m, major, 1H), 3.81 (s, major, 3H), 3.80 (s, minor, 3H), 3.41-3.48 (m, minor, 1H), 3.25-3.37 (m, both, 4H), 3.15-3.23 (m, minor, 2H), 2.30-2.32 (m, major, 2H), 2.11-2.18 (m, minor, 2H);  $^{13}\text{C NMR}$  (100 MHz,  $d_6$ -DMSO)  $\delta_{\text{C}}$  209.1 (major), 209.0 (minor), 203.0 (major), 202.8 (minor), 170.2 (minor), 170.0 (major), 160.0 (both, 2C), 148.4 (major), 148.1 (minor), 138.7 (major), 138.4 (minor), 137.4 (minor), 137.3 (major), 129.5 (both, 2C), 129.2 (both, 2C), 128.4 (major), 128.3 (minor), 128.2 (both, 2C), 128.0 (major), 127.9 (minor), 127.8 (minor), 127.7 (major), 124.9 (major), 124.7 (minor), 106.1 (both, 2C), 87.7 (minor), 87.4 (major),

76.4 (major), 76.3 (minor), 56.4 (both, 2C), 51.8 (minor), 51.6 (both, 2C), 48.7 (major), 47.6 (major), 46.0 (minor), 31.2 (both, 2C), 28.1 (major), 26.6 (minor); **FT-IR**  $\nu_{\max}(\text{NaCl})/\text{cm}^{-1}$  2930 (C-H), 1955 (C=C=C), 1708 (C=O), 1641 (NC=O); **MS** (ESI+)  $m/z$  (rel. intensity %) 384.18 (M + Na<sup>+</sup>, 100); **HRMS** (ESI+) calcd. for C<sub>23</sub>H<sub>23</sub>NNaO<sub>3</sub> [M + Na]<sup>+</sup> 384.1570, found 384.1566.

### Synthesis and characterisation of *N*-benzyl-1-oxo-*N*-(penta-3,4-dien-1-yl)-4-(trifluoromethyl)indane-2-carboxamide **1d**

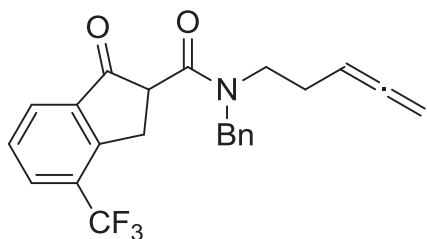

Synthesised from compound **14d** (1.29 g, 5.00 mmol) and amine **10a** (1.30 g, 7.50 mmol) according to the general procedure. Compound **1d** was obtained (1.59 g, 80%) as a yellow oil after purification by flash column chromatography on silica gel (PE/EtOAc 1:1).

Two rotamers in a 1.6:1 ratio, **<sup>1</sup>H NMR** (400 MHz, *d*<sub>6</sub>-DMSO)  $\delta_{\text{H}}$  8.08 (t, both, 2H,  $J = 7.9$  Hz), 7.94-7.99 (m, both, 2H), 7.69 (dd, both, 2H,  $J = 14.4$  Hz,  $J = 7.3$  Hz), 7.41 (t, both, 2H,  $J = 7.5$  Hz), 7.34 (dd, both, 4H,  $J = 13.2$  Hz,  $J = 5.1$  Hz), 7.26 (d, both, 4H,  $J = 6.9$  Hz), 5.24 (qu, major, 1H,  $J = 6.9$  Hz), 5.11 (qu, minor, 1H,  $J = 6.8$  Hz), 5.03 (d, minor, 1H,  $J = 17.0$  Hz), 4.85 (d, major, 1H,  $J = 15.4$  Hz), 4.72-4.78 (m, both, 5H), 4.54-4.56 (m, major, 1H), 4.43 (dd, minor, 1H,  $J = 7.6$  Hz,  $J = 3.6$  Hz), 4.38 (d, major, 1H,  $J = 15.4$  Hz), 3.83 (td, major, 1H,  $J = 15.3$  Hz,  $J = 7.7$  Hz), 3.36-3.51 (m, both, 6H), 3.16-3.23 (m, minor, 1H), 2.32-2.36 (m, major, 2H), 2.13-2.16 (m, minor, 2H); **<sup>13</sup>C NMR** (100 MHz, *d*<sub>6</sub>-DMSO)  $\delta_{\text{C}}$  209.1 (major), 209.0 (minor), 201.9 (major), 201.7 (minor), 169.5 (minor), 169.2 (major), 152.4 (major), 152.2 (minor), 138.5 (major), 138.2 (minor), 137.8 (minor), 137.7 (major), 132.9 (major), 132.8 (minor), 129.7 (both, 2C), 129.5 (both, 2C), 129.3 (both, 2C), 128.8 (both, 2C), 128.3 (both, 2C), 127.9 (both, 2C), 127.8 (both, 2C), 127.7 (both, 2C), 127.5 (both, 2C), 87.7 (minor), 87.3 (major), 76.4 (major), 76.3 (minor), 51.8 (minor), 50.7 (both, 2C), 48.8 (major), 47.7 (major), 46.1 (minor), 30.9 (both, 2C), 28.0 (major), 26.6 (minor); **FT-IR**  $\nu_{\max}(\text{NaCl})/\text{cm}^{-1}$  2935 (C-H), 1956 (C=C=C), 1722 (C=O), 1644 (C=O); **MS** (ESI+)  $m/z$  (rel. intensity %) 422.15 (M + Na<sup>+</sup>, 100); **HRMS** (ESI+) calcd. for C<sub>23</sub>H<sub>20</sub>F<sub>3</sub>NNaO<sub>2</sub> [M + Na]<sup>+</sup> 422.1338, found 422.1335.

### Synthesis and characterisation of *N*-benzyl-5-fluoro-1-oxo-*N*-(penta-3,4-dien-1-yl)indane-2-carboxamide **1e**

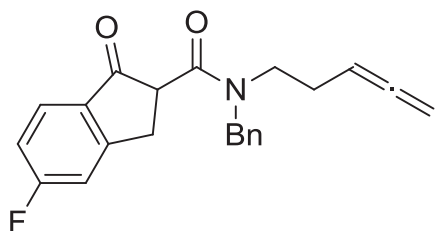

Synthesised from compound **14e** (1.04 g, 5.00 mmol) and amine **10a** (1.30 g, 7.50 mmol) according to the general procedure. Compound **1e** was obtained (1.48 g, 85%) as a yellow oil after purification by flash column chromatography on silica gel (PE/EtOAc 1:2).

Two rotamers in a 1.6:1 ratio, **<sup>1</sup>H NMR** (400 MHz, *d*<sub>6</sub>-DMSO):  $\delta_{\text{H}}$  7.70-7.76 (m, both, 2H), 7.45-7.51 (m, both, 2H), 7.40-7.42 (m, both, 2H), 7.25-7.35 (m, both, 10H), 5.24 (qu, major, 1H,  $J = 6.8$  Hz), 5.11 (qu, minor, 1H,  $J = 6.8$  Hz), 5.02 (d, minor, 1H,  $J = 17.0$  Hz), 4.85 (d, major, 1H,  $J = 15.4$  Hz), 4.72-4.77 (m, both, 5H), 4.45 (dd, major, 1H,  $J = 7.6$  Hz,  $J = 3.8$  Hz),

4.36 (d, major, 1H,  $J = 15.5$  Hz), 4.32-4.34 (m, minor, 1H), 3.82 (td, major, 1H,  $J = 15.3$  Hz,  $J = 7.8$  Hz), 3.26-3.47 (m, both, 6H), 3.14-3.21 (m, minor, 1H), 2.30-2.32 (m, major, 2H), 2.09-2.18 (m, 2H, minor);  $^{13}\text{C}$  NMR (100 MHz,  $d_6$ -DMSO):  $\delta_{\text{C}}$  209.1 (major), 209.0 (minor), 201.5 (major), 201.2 (minor), 169.9 (minor), 169.7 (major), 159.0 (major), 158.8 (minor), 138.6 (both, 2C), 132.8 (both, 2C), 129.5 (both, 2C), 129.3 (both, 2C), 128.3 (both, 2C), 127.9 (both, 2C), 127.8 (both, 2C), 127.2 (major), 127.1 (both, 2C), 127.0 (minor), 116.8 (major), 116.6 (minor), 114.4 (major), 114.2 (minor), 87.7 (minor), 87.4 (major), 76.4 (major), 76.3 (minor), 51.8 (both, 2C), 51.2 (both, 2C), 48.7 (major), 47.6 (major), 46.0 (minor), 31.9 (both, 2C), 28.0 (major), 26.6 (minor); FT-IR  $\nu_{\text{max}}$ (NaCl)/ $\text{cm}^{-1}$  2929 (C-H), 1955 (C=C=C), 1714 (C=O), 1642 (NC=O); MS (ESI+)  $m/z$  (rel. intensity %) 372.16 (M + Na<sup>+</sup>, 100); HRMS (ESI+) calcd. for C<sub>22</sub>H<sub>20</sub>FNNaO<sub>2</sub> [M + Na]<sup>+</sup> 372.1370, found 372.1357.

### Synthesis and characterisation of *N*-benzyl-5-bromo-1-oxo-*N*-(penta-3,4-dien-1-yl)indane-2-carboxamide **1f**

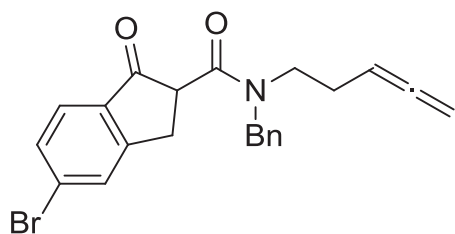

Synthesised from compound **14f** (1.33 g, 5.00 mmol) and amine **10a** (1.30 g, 7.50 mmol) according to the general procedure. Compound **1f** was obtained (1.75 g, 86%) after purification by flash column chromatography on silica gel (PE/EtOAc 1:1).

Two rotamers in a 1.6:1 ratio,  $^1\text{H}$  NMR (400 MHz,  $d_6$ -DMSO)  $\delta_{\text{H}}$  7.91 (d, both, 2H,  $J = 13.5$  Hz), 7.61 (td, both, 4H,  $J = 18.1$  Hz,  $J = 8.3$  Hz), 7.41 (t, both, 2H,  $J = 7.7$  Hz), 7.31-7.34 (m, both, 4H), 7.25 (dd, both, 4H,  $J = 4.9$  Hz,  $J = 2.9$  Hz), 5.23 (qu, major, 1H,  $J = 6.8$  Hz), 5.11 (qu, minor, 1H,  $J = 6.8$  Hz), 5.01 (d, minor, 1H,  $J = 17.0$  Hz), 4.83 (d, major, 1H,  $J = 15.5$  Hz), 4.72-4.77 (m, both, 5H), 4.43 (dd, major, 1H,  $J = 7.6$  Hz,  $J = 3.9$  Hz), 4.37 (d, major, 1H,  $J = 15.4$  Hz), 4.31 (dd, minor, 1H,  $J = 7.8$  Hz,  $J = 3.6$  Hz), 3.80 (td, major, 1H,  $J = 15.2$  Hz,  $J = 7.7$  Hz), 3.25-3.49 (m, major, 6H), 3.14-3.21 (m, minor, 1H), 2.29-2.32 (m, major, 2H), 2.09-2.17 (m, minor, 2H);  $^{13}\text{C}$  NMR (100 MHz,  $d_6$ -DMSO)  $\delta_{\text{C}}$  209.1 (major), 209.0 (minor), 202.2 (major), 202.0 (minor), 169.8 (minor), 169.6 (major), 157.8 (major), 157.5 (minor), 138.6 (major), 138.3 (minor), 135.3 (minor), 135.2 (major), 131.8 (both, 2C), 130.8 (major), 130.7 (minor), 130.5 (both, 2C), 130.4 (both, 2C), 129.5 (both, 2C), 129.3 (both, 2C), 127.9 (both, 2C), 127.8 (both, 2C), 126.1 (both, 2C), 87.7 (minor), 87.3 (major), 76.4 (both, 2C), 51.8 (minor), 51.0 (both, 2C), 48.7 (major), 47.6 (major), 46.0 (minor), 31.7 (both, 2C), 28.0 (major), 26.6 (minor); FT-IR  $\nu_{\text{max}}$ (NaCl)/ $\text{cm}^{-1}$  2926 (C-H), 1955 (C=C=C), 1714 (C=O), 1641 (NC=O); MS (ESI+)  $m/z$  (rel. intensity %) 432.08, 434.07 (M + Na<sup>+</sup>, 100); HRMS (ESI+) calcd. for C<sub>22</sub>H<sub>20</sub>BrNNaO<sub>2</sub> [M + Na]<sup>+</sup> 432.0570, 434.0550, found 432.0570, 434.0556.

### Synthesis and characterisation of *N*-benzyl-5-chloro-1-oxo-*N*-(penta-3,4-dien-1-yl)indane-2-carboxamide **1g**

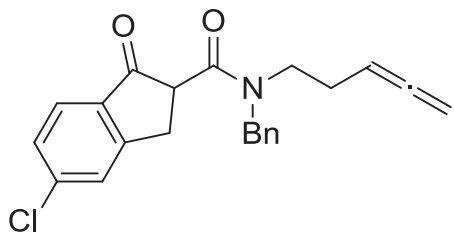

Synthesised from compound **14g** (1.12 g, 5.00 mmol) and amine **10a** (1.30 g, 7.50 mmol) according to the general procedure. Compound **1g** was obtained (1.55 g, 85%) after purification by flash column chromatography on silica gel (PE/EtOAc 1:1).

Two rotamers in a 1.6:1 ratio,  $^1\text{H NMR}$  (400 MHz,  $d_6$ -DMSO)  $\delta_{\text{H}}$  7.75 (d, both, 2H,  $J = 13.5$  Hz), 7.67 (t, both, 2H,  $J = 9.2$  Hz), 7.50 (t, both, 2H,  $J = 7.4$  Hz), 7.41 (t, both, 2H,  $J = 7.6$  Hz), 7.31-7.3 (m, both, 4H), 7.25 (d, both, 4H,  $J = 6.5$  Hz), 5.23 (qu, major, 1H,  $J = 6.8$  Hz), 5.11 (qu, minor, 1H,  $J = 6.8$  Hz), 5.01 (d, minor, 1H,  $J = 17.0$  Hz), 4.84 (d, major, 1H,  $J = 15.4$  Hz), 4.72-4.77 (m, major, 5H), 4.45 (dd, major, 1H,  $J = 7.5$  Hz,  $J = 3.9$  Hz), 4.37 (d, major, 1H,  $J = 15.5$  Hz), 4.32-4.34 (m, minor, 1H), 3.81 (td, major, 1H,  $J = 15.2$  Hz,  $J = 7.7$  Hz), 3.25-3.49 (m, both, 6H), 3.14-3.21 (m, minor, 1H), 2.30-2.32 (m, major, 2H), 2.07-2.17 (m, minor, 2H);  $^{13}\text{C NMR}$  (100 MHz,  $d_6$ -DMSO)  $\delta_{\text{C}}$  209.1 (major), 209.0 (minor), 202.0 (major), 201.8 (minor), 169.9 (minor), 169.6 (major), 157.6 (major), 157.4 (minor), 141.1 (major), 141.0 (minor), 138.6 (major), 138.3 (minor), 135.0 (minor), 134.9 (major), 129.5 (both, 2C), 129.3 (both, 2C), 129.0 (both, 2C), 128.3 (both, 2C), 127.9 (both, 2C), 127.7 (both, 2C), 126.1 (both, 2C), 126.0 (both, 2C), 87.7 (minor), 87.3 (major), 76.4 (major), 76.3 (minor), 51.8 (minor), 51.1 (both, 2C), 48.7 (major), 47.6 (major), 46.0 (minor), 31.7 (both, 2C), 28.0 (major), 26.6 (minor); **FT-IR**  $\nu_{\text{max}}$ (NaCl)/ $\text{cm}^{-1}$  2928 (C-H), 1955 (C=C=C), 1714 (C=O), 1643 (NC=O); **MS** (ESI+)  $m/z$  (rel. intensity %) 388.13 (M + Na<sup>+</sup>, 100); **HRMS** (ESI+) calcd. for C<sub>22</sub>H<sub>20</sub>ClNNaO<sub>2</sub> [M + Na]<sup>+</sup> 388.1075, found 388.1075.

### Synthesis and characterisation of 1-oxo-*N*-(penta-3,4-dien-1-yl)-*N*-propylindane-2-carboxamide **1h**

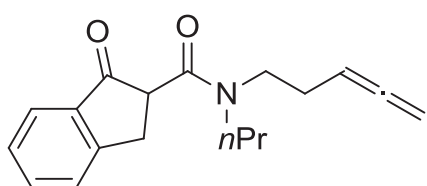

Synthesised from compound **14a** (950 mg, 5.00 mmol) and amine **10b** (937 mg, 7.50 mmol) according to the general procedure. Compound **1h** was obtained (1.10 g, 78%) after purification by flash column chromatography on silica gel (PE/EtOAc 1:1).

Two rotamers in a 1.2:1 ratio,  $^1\text{H NMR}$  (400 MHz,  $d_6$ -DMSO)  $\delta_{\text{H}}$  7.70 (t, both, 2H,  $J = 7.4$  Hz), 7.63 (t, both, 4H,  $J = 7.9$  Hz), 7.44 (t, both, 2H,  $J = 7.4$  Hz), 5.25 (qu, minor, 1H,  $J = 6.9$  Hz), 5.15 (qu, major, 1H,  $J = 6.8$  Hz), 4.75-4.79 (m, both, 4H), 4.24-4.28 (m, both, 2H), 3.79 (td, minor, 1H,  $J = 15.1$  Hz,  $J = 7.6$  Hz), 3.58-3.68 (m, major, 1H), 3.22-3.67 (m, both, 9H), 3.06-3.13 (m, minor, 1H), 2.26-2.37 (m, minor, 2H), 2.10-2.19 (m, major, 2H), 1.56-1.72 (m, major, 2H), 1.41-1.54 (m, minor, 2H), 0.89 (t, major, 3H,  $J = 7.3$  Hz), 0.81 (t, minor, 3H,  $J = 7.4$  Hz);  $^{13}\text{C NMR}$  (100 MHz,  $d_6$ -DMSO)  $\delta_{\text{C}}$  209.2 (major), 209.1 (minor), 203.2 (both, 2C), 169.6 (major), 169.3 (minor), 155.7 (minor), 155.6 (major), 136.3 (minor), 136.1 (major), 128.4 (both, 2C), 127.6 (both, 2C), 124.4 (both, 2C), 124.3 (both, 2C), 87.8 (major), 87.5 (minor), 76.3 (minor), 76.2 (major), 50.9 (major), 50.7 (minor), 50.3 (major), 47.9 (minor), 47.8 (minor), 46.1 (major), 31.9 (both, 2C), 28.5 (major), 27.0 (minor), 23.0 (major), 21.4 (minor), 11.9 (minor), 11.8 (major); **FT-IR**  $\nu_{\text{max}}$ (NaCl)/ $\text{cm}^{-1}$

2932 (C-H), 1955 (C=C=C), 1711 (C=O), 1637 (NC=O); **MS** (ESI+)  $m/z$  (rel. intensity %) 306.18 (M + Na<sup>+</sup>, 100); **HRMS** (ESI+) calcd. for C<sub>18</sub>H<sub>21</sub>NNaO<sub>2</sub> [M + Na]<sup>+</sup> 306.1465, found 306.1474.

### Synthesis and characterisation of *N*-isopropyl-1-oxo-*N*-(penta-3,4-dien-1-yl)indane-2-carboxamide **1i**

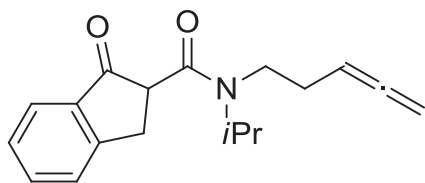

Synthesised from compound **14a** (950 mg, 5.00 mmol) and amine **10c** (937 mg, 7.50 mmol) according to the general procedure. Compound **1i** was obtained (707 mg, 50%) as a yellow solid after purification by flash column chromatography on silica gel (PE/EtOAc 1:1).

**Mp** 44 - 46 °C; two rotamers in a 1.5:1 ratio, **<sup>1</sup>H NMR** (400 MHz, *d*<sub>6</sub>-DMSO) δ<sub>H</sub> 7.70 (t, both, 2H, *J* = 7.4 Hz), 7.62 (t, both, 4H, *J* = 7.7 Hz), 7.44 (t, both, 2H, *J* = 7.4 Hz), 5.27 (qu, minor, 1H, *J* = 6.8 Hz), 5.17 (qu, major, 1H, *J* = 6.8 Hz), 4.75-4.81 (m, both, 4H), 4.39-4.51 (m, both, 2H), 4.36 (dd, major, 1H, *J* = 7.9 Hz, *J* = 3.6 Hz), 4.15 (t, minor, 1H, *J* = 5.7 Hz), 3.62-3.70 (m, major, 1H), 3.11-3.48 (m, both, 7H), 2.30-2.32 (m, minor, 2H), 2.07-2.16 (m, major, 2H), 1.30 (d, major, 3H, *J* = 6.5 Hz), 1.18 (d, major, 3H, *J* = 6.6 Hz), 1.11-1.14 (m, minor, 6H); **<sup>13</sup>C NMR** (100 MHz, *d*<sub>6</sub>-DMSO) δ<sub>C</sub> 209.0 (minor), 208.9 (major), 203.4 (minor), 203.0 (major), 168.7 (both, 2C), 155.8 (minor), 155.5 (major), 136.2 (major), 136.1 (minor), 136.0 (both, 2C), 128.4 (both, 2C), 127.6 (both, 2C), 124.4 (both, 2C), 88.1 (major), 87.5 (minor), 76.5 (minor), 76.3 (major), 51.5 (minor), 51.1 (major), 49.2 (major), 46.8 (minor), 43.6 (major), 41.1 (minor), 32.1 (minor), 31.7 (major), 30.4 (minor), 28.2 (major), 22.1 (major), 22.0 (major), 21.0 (minor), 20.9 (minor); **FT-IR** ν<sub>max</sub>(NaCl)/cm<sup>-1</sup> 2974 (C-H), 1955 (C=C=C), 1713 (C=O), 1637 (NC=O); **MS** (ESI+)  $m/z$  (rel. intensity %) 306.18 (M + Na<sup>+</sup>, 100); **HRMS** (ESI+) calcd. for C<sub>18</sub>H<sub>21</sub>NNaO<sub>2</sub> [M + Na]<sup>+</sup> 306.1465, found 306.1471.

### Synthesis and characterisation of *N*-(4-methoxybenzyl)-1-oxo-*N*-(penta-3,4-dien-1-yl)indane-2-carboxamide **1j**

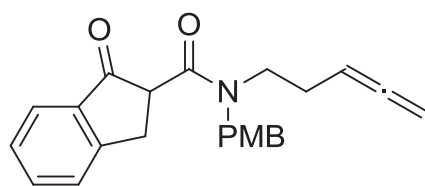

Synthesised from compound **14a** (950 mg, 5.00 mmol) and amine **10d** (1.52 g, 7.50 mmol) according to the general procedure. Compound **1j** was obtained (1.57 g, 87%) as a yellow oil after purification by flash column chromatography on silica gel (PE/EtOAc 1:1).

Two rotamers in a 1.5:1 ratio, **<sup>1</sup>H NMR** (400 MHz, *d*<sub>6</sub>-DMSO) δ<sub>H</sub> 7.60-7.73 (m, both, 6H), 7.45 (dd, both, 2H, *J* = 12.6 Hz, *J* = 7.1 Hz), 7.29 (d, minor, 2H, *J* = 8.4 Hz), 7.19 (d, major, 2H, *J* = 8.4 Hz), 6.96 (d, minor, 2H, *J* = 8.4 Hz), 6.89 (d, major, 2H, *J* = 8.4 Hz), 5.23 (qu, major, 1H, *J* = 6.8 Hz), 5.11 (qu, minor, 1H, *J* = 6.8 Hz), 4.92 (d, minor, 1H, *J* = 16.6 Hz), 4.74-4.79 (m, both, 5H), 4.67 (d, minor, 1H, *J* = 16.6 Hz), 4.37 (dd, major, 1H, *J* = 7.7 Hz, *J* = 3.9 Hz), 4.33-4.35 (m, minor, 1H), 4.30 (d, major, 1H, *J* = 15.0 Hz), 3.70-3.82 (m, major, 1H), 3.75 (s, minor, 3H), 3.73 (s, major, 3H), 3.26-3.43 (m, both, 6H), 3.14-3.21 (m, minor, 1H), 2.26-2.31 (m, major, 2H), 2.06-2.18 (m, minor, 2H); **<sup>13</sup>C NMR** (100 MHz, *d*<sub>6</sub>-DMSO) δ<sub>C</sub> 209.1 (major), 209.0 (minor), 203.3 (major), 203.1 (minor), 170.0 (minor), 169.9 (major), 159.5 (minor), 159.2 (major), 155.8 (major), 155.5 (minor), 136.2 (both, 2C),

136.1 (both, 2C), 130.5 (both, 2C), 130.0 (both, 2C), 129.5 (both, 2C), 129.2 (both, 2C), 128.5 (both, 2C), 127.7 (major), 127.6 (minor), 124.5 (major), 124.4 (minor), 114.9 (minor), 114.7 (major), 87.7 (minor), 87.4 (major), 76.4 (major), 76.3 (minor), 55.9 (minor), 55.8 (major), 51.3 (minor), 50.9 (both, 2C), 48.0 (major), 45.7 (minor), 47.3 (major), 31.9 (both, 2C), 28.0 (major), 26.6 (minor); **FT-IR**  $\nu_{\max}(\text{NaCl})/\text{cm}^{-1}$  2930 (C-H), 1955 (C=C=C), 1709 (C=O), 1639 (NC=O); **MS** (ESI+)  $m/z$  (rel. intensity %) 384.18 (M + Na<sup>+</sup>, 100); **HRMS** (ESI+) calcd. for C<sub>23</sub>H<sub>23</sub>NNaO<sub>3</sub> [M + Na]<sup>+</sup> 384.1570, found 384.1563.

### Synthesis and characterisation of 5-bromo-*N*-(4-methoxybenzyl)-1-oxo-*N*-(penta-3,4-dien-1-yl)indane-2-carboxamide **1k**

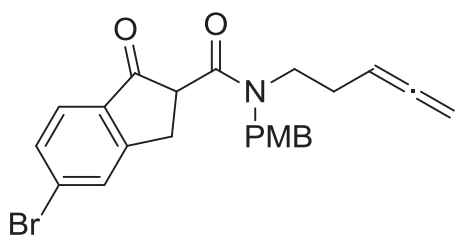

Synthesised from compound **14f** (1.33 g, 5.00 mmol) and amine **10d** (1.52 g, 7.50 mmol) according to the general procedure. Compound **1k** was obtained (1.76 g, 81%) as a yellow solid after purification by flash column chromatography on silica gel (PE/EtOAc 1:1).

**Mp** 70 - 73 °C; two rotamers in a 1.5:1 ratio, **<sup>1</sup>H NMR** (400 MHz, *d*<sub>6</sub>-DMSO)  $\delta_{\text{H}}$  7.90 (d, both, 2H,  $J = 10.3$  Hz), 7.64 (t, both, 2H,  $J = 6.4$  Hz), 7.58 (dd, both, 2H,  $J = 8.1$  Hz,  $J = 5.2$  Hz), 7.27 (d, both, 2H,  $J = 8.4$  Hz), 7.17 (d, both, 2H,  $J = 8.3$  Hz), 6.95 (d, both, 2H,  $J = 8.4$  Hz), 6.88 (d, both, 2H,  $J = 8.4$  Hz), 5.22 (qu, major, 1H,  $J = 6.8$  Hz), 5.10 (qu, minor, 1H,  $J = 6.8$  Hz), 4.89 (d, minor, 1H,  $J = 16.6$  Hz), 4.72-4.77 (m, both, 5H), 4.65 (d, minor, 1H,  $J = 16.6$  Hz), 4.33-4.39 (m, both, 2H), 4.29 (d, major, 1H,  $J = 15.0$  Hz), 3.75 (s, minor, 3H), 3.73 (s, major, 3H), 3.67-3.77 (m, both, 2H), 3.28-3.37 (m, both, 5H), 3.13-3.20 (m, minor, 1H), 2.27-2.29 (m, major, 2H), 2.10-2.12 (m, minor, 2H); **<sup>13</sup>C NMR** (100 MHz, *d*<sub>6</sub>-DMSO)  $\delta_{\text{C}}$  209.1 (major), 209.0 (minor), 202.3 (major), 202.1 (minor), 169.7 (minor), 169.6 (major), 159.5 (minor), 159.2 (major), 157.8 (major), 157.5 (minor), 135.3 (minor), 135.2 (major), 131.8 (both, 2C), 130.8 (both, 2C), 130.5 (both, 2C), 130.4 (both, 2C), 129.9 (both, 2C), 129.5 (both, 2C), 129.2 (both, 2C), 126.1 (both, 2C), 114.9 (minor), 114.7 (major), 87.7 (minor), 87.4 (major), 76.4 (major), 76.3 (minor), 55.9 (both, 2C), 51.2 (minor), 51.0 (both, 2C), 48.1 (major), 47.3 (major), 45.7 (minor), 31.7 (both, 2C), 28.0 (major), 26.5 (minor); **FT-IR**  $\nu_{\max}(\text{NaCl})/\text{cm}^{-1}$  2928 (C-H), 1955 (C=C=C), 1714 (C=O), 1639 (NC=O); **MS** (ESI+)  $m/z$  (rel. intensity %) 462.09, 464.08 (M + Na<sup>+</sup>, 80); **HRMS** (ESI+) calcd. for C<sub>23</sub>H<sub>22</sub>BrNNaO<sub>3</sub> [M + Na]<sup>+</sup> 462.0675, 464.0656, found 462.0670, 464.0651.

The *N*-tosylated  $\gamma$ -lactam-derived pro-nucleophile **11** was synthesised using a previously reported procedure.<sup>[5]</sup>

## 5. Synthesis of spiroactams 2 and 4

### General procedure for the synthesis of spiroactams 2a-q and 4a-m

Pd(OAc)<sub>2</sub> (10 mol%) and bis(oxazoline) **3i** (20 mol%) were stirred for 1 h in DCE (4 mL) at room temperature. Then the corresponding allene **1a-k** (0.20 mmol), aromatic/vinyl iodide (0.30 mmol) and Ag<sub>3</sub>PO<sub>4</sub> (0.10 mmol) were added. The reaction mixture was stirred in a sealed tube at 70 °C and monitored by TLC analysis. Upon completion, the reaction mixture was filtered through a short pad of silica gel, eluting with Et<sub>2</sub>O several times. The combined organic washings were dried over Na<sub>2</sub>SO<sub>4</sub>, filtered and concentrated. The residue was purified by flash column chromatography on silica gel (PE/EtOAc) to afford the desired products **2a-q** and **4a-m**.

Racemic samples were synthesised in an analogous manner to the general procedure without ligand **3i** and by replacing Ag<sub>3</sub>PO<sub>4</sub>, Pd(OAc)<sub>2</sub> and DCE with K<sub>2</sub>CO<sub>3</sub>, PdCl<sub>2</sub>(dppf) and DMF respectively.

### Synthesis and characterisation of methyl 4-{1-[(2*R*,4'*S*)-1'-benzyl-1,2'-dioxo-1,3-dihydrospiro[indene-2,3'-piperidin]-4-yl]vinyl}benzoate **2a**

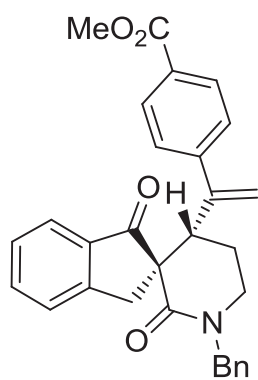

Synthesised from substrate **1a** (66 mg, 0.20 mmol) and methyl 4-iodobenzoate (79 mg, 0.30 mmol) according to the general procedure. Compound **2a** was obtained (single diastereomer, 78 mg, 84%) as a colourless oil after flash column chromatography on silica gel (PE/EtOAc 2:1). Analysis of the <sup>1</sup>H NMR spectrum of the crude reaction mixture showed a >99:1 dr.

The *ee* was determined by HPLC analysis using a Chiralcel AD column, hexane/isopropanol 60:40, 1.0 mL/min, λ = 230 nm, major t<sub>R</sub> = 8.16 min, minor t<sub>R</sub> = 11.14 min (85% *ee*). [α]<sub>D</sub><sup>25</sup> = -4.8 (*c* 1.3, CH<sub>2</sub>Cl<sub>2</sub>).

<sup>1</sup>H NMR (400 MHz, CDCl<sub>3</sub>) δ<sub>H</sub> 7.67 (d, 2H, *J* = 8.4 Hz), 7.49-7.53 (m, 1H), 7.30-7.39 (m, 6H), 7.14-7.22 (m, 2H), 6.89 (d, 2H, *J* = 8.4 Hz), 5.28 (s, 1H), 5.14 (s, 1H), 4.70 (d, 1H, *J* = 14.6 Hz), 4.59 (d, 1H, *J* = 14.6 Hz), 3.89 (s, 3H), 3.71 (dd, 1H, *J* = 10.5 Hz, *J* = 2.0 Hz), 3.49-3.58 (m, 2H), 3.38-3.43 (m, 1H), 3.33 (d, 1H, *J* = 17.0 Hz), 2.35 (ddd, 1H, *J* = 13.1 Hz, *J* = 6.9 Hz, *J* = 4.0 Hz), 1.91 (dtd, 1H, *J* = 13.7 Hz, *J* = 10.4 Hz, *J* = 5.2 Hz); <sup>13</sup>C NMR (100 MHz, CDCl<sub>3</sub>) δ<sub>C</sub> 204.8, 170.4, 166.7, 153.9, 148.3, 145.4, 136.7, 136.4, 134.9 (2C), 129.0 (2C), 128.7 (2C), 128.1 (2C), 127.5, 127.3, 126.9 (2C), 125.8, 124.2, 117.2, 60.0, 52.1, 50.6, 45.7, 43.9, 36.5, 24.9; FT-IR ν<sub>max</sub>(NaCl)/cm<sup>-1</sup> 2928 (C-H), 1718 (C=O), 1632 (NC=O), 1595 (C=C); MS (ESI+) *m/z* (rel. intensity %) 488.21 (M + Na<sup>+</sup>, 100); HRMS (ESI+) calcd. for C<sub>30</sub>H<sub>27</sub>NNaO<sub>4</sub> [M + Na]<sup>+</sup> 488.1832, found 488.1833.

### Synthesis and characterisation of (2*R*,4'*S*)-1'-benzyl-4'-(1-phenylvinyl)-2'*H*-spiro[indene-2,3'-piperidine]-1,2'(3*H*)-dione **2b**

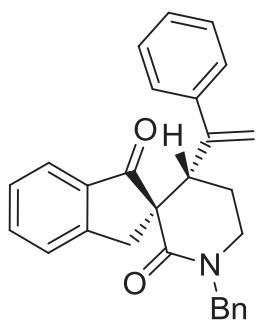

Synthesised from substrate **1a** (66 mg, 0.20 mmol) and iodobenzene (61 mg, 0.30 mmol) according to the general procedure. Compound **2b** was obtained (single diastereomer, 67 mg, 82%) as a colourless oil after purification by flash column chromatography on silica gel (PE/EtOAc 3:1). Analysis of the  $^1\text{H}$  NMR spectrum of the crude reaction mixture showed a 45:1 dr.

The *ee* was determined by HPLC analysis using a Chiralcel AD column, hexane/isopropanol 60:40, 1.0 mL/min,  $\lambda = 230$  nm, major  $t_{\text{R}} = 5.53$  min, minor  $t_{\text{R}} = 14.41$  min (87% *ee*);  $[\alpha]_{\text{D}}^{25} = -16.6$  (*c* 1.34,  $\text{CH}_2\text{Cl}_2$ ).

$^1\text{H}$  NMR (400 MHz,  $\text{CDCl}_3$ )  $\delta_{\text{H}}$  7.49-7.53 (m, 1H), 7.27-7.39 (m, 7H), 7.18 (t, 1H,  $J = 7.4$  Hz), 7.08-7.11 (m, 1H), 7.00-7.04 (m, 2H), 6.86-6.88 (m, 2H), 5.24 (s, 1H), 5.05 (s, 1H), 4.65 (s, 2H), 3.68 (dd, 1H,  $J = 10.1$  Hz,  $J = 2.1$  Hz), 3.58 (d, 1H,  $J = 16.9$  Hz), 3.49-3.54 (m, 1H), 3.39-3.44 (m, 1H), 3.36 (d, 1H,  $J = 17.0$  Hz), 2.39-2.45 (m, 1H), 1.83-1.92 (m, 1H);  $^{13}\text{C}$  NMR (100 MHz,  $\text{CDCl}_3$ )  $\delta_{\text{C}}$  204.9, 170.5, 154.1, 149.0, 140.8, 136.8, 136.3, 134.7, 128.7 (2C), 128.1 (2C), 127.7 (2C), 127.5, 127.4, 127.1, 126.9 (2C), 125.8, 124.3, 115.6, 60.0, 50.7, 45.7, 44.1, 36.7, 24.6; FT-IR  $\nu_{\text{max}}(\text{NaCl})/\text{cm}^{-1}$  2926 (C-H), 1717 (C=O), 1631 (NC=O), 1590 (C=C); MS (ESI+)  $m/z$  (rel. intensity %) 430.19 (M + Na<sup>+</sup>, 100); HRMS (ESI+) calcd. for  $\text{C}_{28}\text{H}_{25}\text{NNaO}_2$  [M + Na]<sup>+</sup> 430.1778, found 430.1777.

### Synthesis and characterisation of (2*R*,4'*S*)-1'-benzyl-4'-[1-(4-methoxyphenyl)vinyl]-2'*H*-spiro[indene-2,3'-piperidine]-1,2'(3*H*)-dione **2c**

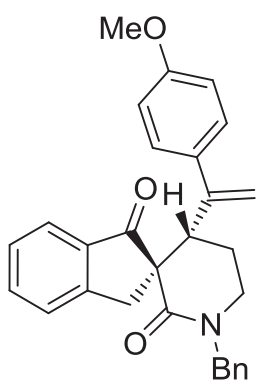

Synthesised from substrate **1a** (66 mg, 0.20 mmol) and 1-iodo-4-methoxybenzene (70 mg, 0.30 mmol) according to the general procedure. Compound **2c** was obtained (single diastereomer, 74 mg, 85%) as a colourless oil after purification by flash column chromatography on silica gel (PE/EtOAc 2:1). Analysis of the  $^1\text{H}$  NMR spectrum of the crude reaction mixture showed a 56:1 dr.

The *ee* was determined by HPLC analysis using a Chiralcel AD column, hexane/isopropanol 60:40, 1.0 mL/min,  $\lambda = 230$  nm, major  $t_{\text{R}} = 6.30$  min, minor  $t_{\text{R}} = 8.70$  min (87% *ee*);  $[\alpha]_{\text{D}}^{25} = +1.4$  (*c* 1.0,  $\text{CH}_2\text{Cl}_2$ ).

$^1\text{H}$  NMR (400 MHz,  $\text{CDCl}_3$ )  $\delta_{\text{H}}$  7.48-7.52 (m, 1H), 7.30-7.37 (m, 7H), 7.17 (t, 1H,  $J = 7.4$  Hz), 6.78 (dd, 2H,  $J = 9.2$  Hz,  $J = 2.5$  Hz), 6.53-6.55 (m, 2H), 5.18 (s, 1H), 4.99 (s, 1H), 4.63 (s, 2H), 3.73 (s, 3H), 3.65 (dd, 1H,  $J = 10.2$  Hz,  $J = 1.4$  Hz), 3.49-3.56 (m, 2H), 3.39-3.43 (m, 1H), 3.35 (d, 1H,  $J = 16.9$  Hz), 2.38 (ddd, 1H,  $J = 12.9$  Hz,  $J = 7.4$  Hz,  $J = 4.3$  Hz), 1.87 (dtd, 1H,  $J = 15.1$  Hz,  $J = 10.1$  Hz,  $J = 5.2$  Hz);  $^{13}\text{C}$  NMR (100 MHz,  $\text{CDCl}_3$ )  $\delta_{\text{C}}$  205.1, 170.7, 159.0, 154.2, 148.5, 136.8, 136.4, 134.6, 133.1, 128.7 (2C), 128.2 (2C), 128.1 (2C), 127.4, 126.9, 125.7, 124.2, 114.4, 113.1 (2C), 60.1, 55.2, 50.7, 45.8, 44.3, 36.6, 24.7; FT-IR  $\nu_{\text{max}}(\text{NaCl})/\text{cm}^{-1}$  2928 (C-H), 1716 (C=O), 1631 (NC=O), 1607 (C=C); MS (ESI+)  $m/z$  (rel. intensity %) 460.21 (M + Na<sup>+</sup>, 70); HRMS (ESI+) calcd. for  $\text{C}_{29}\text{H}_{27}\text{NNaO}_3$  [M + Na]<sup>+</sup> 460.1883, found 460.1881.



### Synthesis and characterisation of (2*R*,4'*S*)-1'-benzyl-4'-[1-(3,5-dimethylphenyl)vinyl]-2'*H*-spiro[indene-2,3'-piperidine]-1,2'(3*H*)-dione **2d**

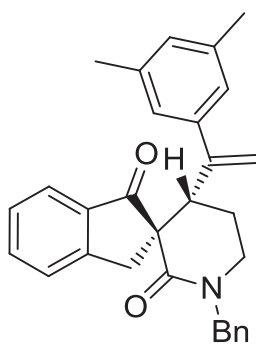

Synthesised from substrate **1a** (66 mg, 0.20 mmol) and 1-iodo-3,5-dimethylbenzene (70 mg, 0.30 mmol) according to the general procedure. Compound **2d** was obtained (single diastereomer, 66 mg, 76%) as a colourless solid after purification by flash column chromatography on silica gel (PE/EtOAc 2:1). Analysis of the  $^1\text{H}$  NMR spectrum of the crude reaction mixture showed a 39:1 dr.

The *ee* was determined by HPLC analysis using a Chiralcel AD column, hexane/isopropanol 60:40, 1.0 mL/min,  $\lambda = 230$  nm, major  $t_{\text{R}} = 4.34$  min, minor  $t_{\text{R}} = 14.92$  min (89% *ee*);  $[\alpha]_{\text{D}}^{25} = -9.8$  (*c* 1.84,  $\text{CH}_2\text{Cl}_2$ ).

**Mp** 106 - 109 °C;  $^1\text{H}$  NMR (400 MHz,  $\text{CDCl}_3$ )  $\delta_{\text{H}}$  7.50-7.54 (m, 1H), 7.23-7.39 (m, 7H), 7.20 (t, 1H,  $J = 7.4$  Hz), 6.73 (s, 1H), 6.45 (s, 2H), 5.20 (s, 1H), 5.00 (s, 1H), 4.71 (d, 1H,  $J = 14.6$  Hz), 4.58 (d, 1H,  $J = 14.6$  Hz), 3.63 (dd, 1H,  $J = 9.9$  Hz,  $J = 2.5$  Hz), 3.57 (d, 1H,  $J = 17.0$  Hz), 3.49-3.53 (m, 1H), 3.38-3.41 (m, 1H), 3.34 (d, 1H,  $J = 17.0$  Hz), 2.38-2.45 (m, 1H), 2.11 (s, 6H), 1.85 (m, 1H);  $^{13}\text{C}$  NMR (100 MHz,  $\text{CDCl}_3$ )  $\delta_{\text{C}}$  205.0, 170.6, 154.2, 149.3, 140.8, 137.1 (2C), 136.9, 136.3, 134.4, 129.1, 128.7 (2C), 128.1 (2C), 127.4, 127.0, 125.8, 125.1 (2C), 124.2, 114.9, 60.0, 50.7, 45.6, 44.5, 36.8, 24.5, 21.1 (2C); **FT-IR**  $\nu_{\text{max}}(\text{NaCl})/\text{cm}^{-1}$  2920 (C-H), 1718 (C=O), 1631 (NC=O), 1590 (C=C); **MS** (ESI+) *m/z* (rel. intensity %) 458.23 ( $\text{M} + \text{Na}^+$ , 80); **HRMS** (ESI+) calcd. for  $\text{C}_{30}\text{H}_{29}\text{NNaO}_2$  [ $\text{M} + \text{Na}$ ] $^+$  458.2091, found 458.2087.

### Synthesis and characterisation of methyl 3-{1-[(2*R*,4'*S*)-1'-benzyl-1,2'-dioxo-1,3-dihydrospiro[indene-2,3'-piperidin]-4'-yl]vinyl}benzoate **2e**

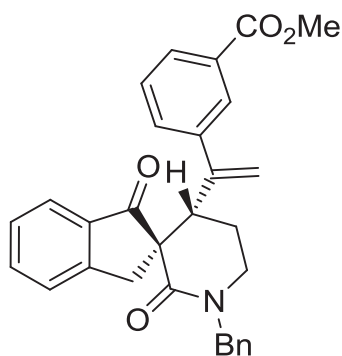

Synthesised from substrate **1a** (66 mg, 0.20 mmol) and methyl 3-iodobenzoate (79 mg, 0.30 mmol) according to the general procedure. Compound **2e** was obtained (single diastereomer, 80 mg, 86%) as a colourless oil after purification by flash column chromatography on silica gel (PE/EtOAc 1:1). Analysis of the  $^1\text{H}$  NMR spectrum of the crude reaction mixture showed a 41:1 dr.

The *ee* was determined by HPLC analysis using a Chiralcel AD column, hexane/isopropanol 60:40, 1.0 mL/min,  $\lambda = 230$  nm, major  $t_{\text{R}} = 6.31$  min, minor  $t_{\text{R}} = 17.26$  min (86% *ee*);  $[\alpha]_{\text{D}}^{25} = -0.32$  (*c* 2.5,  $\text{CH}_2\text{Cl}_2$ ).

$^1\text{H}$  NMR (400 MHz,  $\text{CDCl}_3$ )  $\delta_{\text{H}}$  7.75 (d, 1H,  $J = 7.5$  Hz), 7.49 (t, 1H,  $J = 7.3$  Hz), 7.30-7.40 (m, 7H), 7.20 (d, 1H,  $J = 7.6$  Hz), 7.06-7.15 (m, 3H), 5.26 (s, 1H), 5.12 (s, 1H), 4.70 (d, 1H,  $J = 14.6$  Hz), 4.59 (d, 1H,  $J = 14.6$  Hz), 3.85 (s, 3H), 3.69-3.72 (m, 1H), 3.50-3.59 (m, 2H), 3.39-3.44 (m, 1H), 3.35 (d, 1H,  $J = 17.0$  Hz), 2.36 (ddd, 1H,  $J = 13.0$  Hz,  $J = 6.9$  Hz,  $J = 3.9$  Hz), 1.91 (ddt, 1H,  $J = 15.6$  Hz,  $J = 10.5$  Hz,  $J = 5.2$  Hz);  $^{13}\text{C}$  NMR (100 MHz,  $\text{CDCl}_3$ )  $\delta_{\text{C}}$  204.9, 170.5, 166.6, 153.9, 148.3, 141.1, 136.8, 136.4, 134.7, 131.4, 129.5, 128.7 (2C), 128.6, 128.5, 128.1 (2C), 127.7, 127.5, 127.1, 125.9, 124.1, 116.7, 59.9, 52.0, 50.6, 45.7, 44.2, 36.5, 24.8; **FT-IR**  $\nu_{\text{max}}(\text{NaCl})/\text{cm}^{-1}$  2918 (C-H), 1719 (C=O), 1631

(NC=O), 1589 (C=C); **MS** (ESI+)  $m/z$  (rel. intensity %) 488.21 (M + Na<sup>+</sup>, 100); **HRMS** (ESI+) calcd. for C<sub>30</sub>H<sub>27</sub>NNaO<sub>4</sub> [M + Na]<sup>+</sup> 488.1832, found 488.1826.

### Synthesis and characterisation of (2*R*,4'*S*)-1'-benzyl-4'-[1-(4-bromophenyl)vinyl]-2'*H*-spiro[indene-2,3'-piperidine]-1,2'(3*H*)-dione **2f**

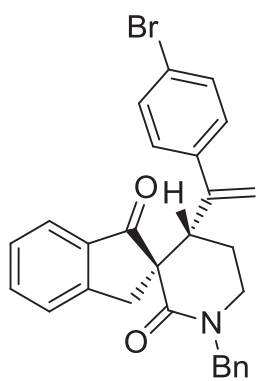

Synthesised from substrate **1a** (66 mg, 0.20 mmol) and 1-bromo-4-iodobenzene (85 mg, 0.30 mmol) according to the general procedure. Compound **2f** was obtained (single diastereomer, 76 mg, 79%) as a colourless solid after purification by flash column chromatography on silica gel (PE/EtOAc 2:1). Analysis of the <sup>1</sup>H NMR spectrum of the crude reaction mixture showed a 25:1 dr.

The *ee* was determined by HPLC analysis using a Chiralcel AD column, hexane/isopropanol 60:40, 1.0 mL/min, λ = 230 nm, major t<sub>R</sub> = 5.88 min, minor t<sub>R</sub> = 8.62 min (86% *ee*); [α]<sub>D</sub><sup>25</sup> = +24.8 (*c* 2.68, CH<sub>2</sub>Cl<sub>2</sub>).

**Mp** 58 - 62 °C; **<sup>1</sup>H NMR** (400 MHz, CDCl<sub>3</sub>) δ<sub>H</sub> 7.49-7.53 (m, 1H), 7.27-7.39 (m, 7H), 7.21 (t, 1H, *J* = 7.4 Hz), 7.10 (dd, 2H, *J* = 8.8 Hz, *J* = 2.1 Hz), 6.68 (dd, 2H, *J* = 8.8 Hz, *J* = 2.1 Hz), 5.21 (s, 1H), 5.08 (s, 1H), 4.68 (d, 1H, *J* = 14.6 Hz), 4.61 (d, 1H, *J* = 14.6 Hz), 3.65 (dd, 1H, *J* = 10.8 Hz, *J* = 1.5 Hz), 3.48-3.57 (m, 2H), 3.39 (td, 1H, *J* = 12.3 Hz, *J* = 4.5 Hz), 3.31 (d, 1H, *J* = 17.0 Hz), 2.32 (ddd, 1H, *J* = 13.2 Hz, *J* = 6.9 Hz, *J* = 4.0 Hz), 1.90 (dtd, 1H, *J* = 13.5 Hz, *J* = 10.6 Hz, *J* = 5.2 Hz); **<sup>13</sup>C NMR** (100 MHz, CDCl<sub>3</sub>) δ<sub>C</sub> 205.1, 170.6, 154.0, 148.1, 139.5, 136.7, 136.5, 134.8, 130.7 (2C), 128.7 (2C), 128.6 (2C), 128.1 (2C), 127.5, 127.1, 125.8, 124.3, 121.6, 116.3, 60.0, 50.6, 45.8, 44.1, 36.5, 24.9; **FT-IR** ν<sub>max</sub>(NaCl)/cm<sup>-1</sup> 2924 (C-H), 1716 (C=O), 1631 (NC=O), 1588 (C=C); **MS** (ESI+)  $m/z$  (rel. intensity %) 508.10, 510.11 (M + Na<sup>+</sup>, 80); **HRMS** (ESI+) calcd. for C<sub>28</sub>H<sub>24</sub>BrNNaO<sub>2</sub> [M + Na]<sup>+</sup> 508.0883, 510.0864, found 508.0877, 510.0863.

### Synthesis and characterisation of (2*R*,4'*S*)-1'-benzyl-4'-[1-(4-chlorophenyl)vinyl]-2'*H*-spiro[indene-2,3'-piperidine]-1,2'(3*H*)-dione **2g**

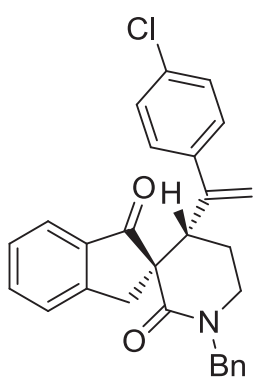

Synthesised from substrate **1a** (66 mg, 0.20 mmol) and 1-chloro-4-iodobenzene (71 mg, 0.30 mmol) according to the general procedure. Compound **2g** was obtained (single diastereomer, 74 mg, 84%) as a colourless solid after purification by flash column chromatography on silica gel (PE/EtOAc 2:1). Analysis of the <sup>1</sup>H NMR spectrum of the crude reaction mixture showed a 33:1 dr.

The *ee* was determined by HPLC analysis using a Chiralcel AD column, hexane/isopropanol 60:40, 1.0 mL/min, λ = 230 nm, major t<sub>R</sub> = 5.72 min, minor t<sub>R</sub> = 8.47 min (87% *ee*); [α]<sub>D</sub><sup>25</sup> = +14.8 (*c* 3.1, CH<sub>2</sub>Cl<sub>2</sub>).

**Mp** 58 - 60 °C; **<sup>1</sup>H NMR** (400 MHz, CDCl<sub>3</sub>) δ<sub>H</sub> 7.52 (dd, 1H, *J* = 10.8 Hz, *J* = 3.9 Hz), 7.27-7.39 (m, 7H), 7.20 (t, 1H, *J* = 7.4 Hz), 6.95 (d, 2H, *J* = 8.4 Hz), 6.74 (d, 2H, *J* = 8.4 Hz), 5.20 (s, 1H), 5.08 (s, 1H), 4.68 (d, 1H, *J* = 14.6 Hz), 4.61 (d, 1H, *J* = 14.6 Hz), 3.66 (dd, 1H, *J* = 10.6 Hz, *J* = 1.5 Hz), 3.49-3.57 (m, 2H), 3.39 (td, 1H, *J* = 12.3 Hz, *J* = 4.6 Hz), 3.32 (d, 1H, *J* = 17.0 Hz), 2.32 (ddd, 1H, *J* =

13.1 Hz,  $J = 6.8$  Hz,  $J = 3.8$  Hz), 1.85-1.95 (m, 1H);  $^{13}\text{C}$  NMR (100 MHz,  $\text{CDCl}_3$ )  $\delta_{\text{C}}$  205.0, 170.6, 154.0, 148.1, 139.1, 136.5, 134.8 (2C), 133.4, 128.7 (2C), 128.3 (2C), 128.1 (2C), 127.7 (2C), 127.5, 127.1, 125.8, 124.3, 116.2, 60.0, 50.6, 45.8, 44.1, 36.5, 24.9; FT-IR  $\nu_{\text{max}}(\text{NaCl})/\text{cm}^{-1}$  2925 (C-H), 1716 (C=O), 1631 (NC=O), 1589 (C=C); MS (ESI+)  $m/z$  (rel. intensity %) 464.15 ( $\text{M} + \text{Na}^+$ , 100); HRMS (ESI+) calcd. for  $\text{C}_{28}\text{H}_{24}\text{ClNNaO}_2$  [ $\text{M} + \text{Na}$ ] $^+$  464.1388, found 464.1384.

### Synthesis and characterisation of (2*R*,4'*S*)-1'-benzyl-4'-[1-(3-nitrophenyl)vinyl]-2'*H*-spiro[indene-2,3'-piperidine]-1,2'(3*H*)-dione 2h

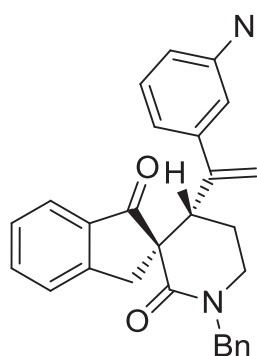

Synthesised from substrate **1a** (66 mg, 0.20 mmol) and 1-iodo-3-nitrobenzene (75 mg, 0.30 mmol) according to the general procedure. Compound **2h** was obtained (single diastereomer, 69 mg, 77%) as a colourless oil after purification by flash column chromatography on silica gel (PE/EtOAc 1:2). Analysis of the  $^1\text{H}$  NMR spectrum of the crude reaction mixture showed a 35:1 dr.

The *ee* was determined by HPLC analysis using a Chiralcel AD column, hexane/isopropanol 60:40, 1.0 mL/min,  $\lambda = 230$  nm, major  $t_{\text{R}} = 7.34$  min, minor  $t_{\text{R}} = 19.96$  min (86% *ee*);  $[\alpha]_{\text{D}}^{25} = -8.2$  ( $c$  1.34,  $\text{CH}_2\text{Cl}_2$ ).

$^1\text{H}$  NMR (400 MHz,  $\text{CDCl}_3$ )  $\delta_{\text{H}}$  7.89-7.94 (m, 1H), 7.50 (ddd, 1H,  $J = 8.2$  Hz,  $J = 5.8$  Hz,  $J = 2.6$  Hz), 7.24-7.42 (m, 9H), 7.08-7.12 (m, 2H), 5.30 (s, 1H), 5.23 (d, 1H,  $J = 0.7$  Hz), 4.73 (d, 1H,  $J = 14.6$  Hz), 4.57 (d, 1H,  $J = 14.6$  Hz), 3.73-3.75 (m, 1H), 3.59 (dt, 1H,  $J = 11.8$  Hz,  $J = 4.3$  Hz), 3.48 (d, 1H,  $J = 17.0$  Hz), 3.42 (ddd, 1H,  $J = 12.3$  Hz,  $J = 5.1$  Hz,  $J = 3.1$  Hz), 3.33 (d, 1H,  $J = 17.0$  Hz), 2.26-2.31 (m, 1H), 1.94-2.04 (m, 1H);  $^{13}\text{C}$  NMR (100 MHz,  $\text{CDCl}_3$ )  $\delta_{\text{C}}$  205.0, 170.4, 153.8, 147.4, 147.3, 142.3, 136.6, 136.5, 135.2, 132.9, 129.0, 128.7, 128.4, 128.1, 127.6, 127.2, 126.0, 123.9, 122.5 (2C), 122.3, 118.2, 59.9, 50.6, 45.9, 44.2, 36.3, 25.2; FT-IR  $\nu_{\text{max}}(\text{NaCl})/\text{cm}^{-1}$  2927 (C-H), 1716 (C=O), 1630 (NC=O), 1592 (C=C); MS (ESI+)  $m/z$  (rel. intensity %) 475.18 ( $\text{M} + \text{Na}^+$ , 100); HRMS (ESI+) calcd. for  $\text{C}_{28}\text{H}_{24}\text{N}_2\text{NaO}_4$  [ $\text{M} + \text{Na}$ ] $^+$  475.1628, found 475.1630.

### Synthesis and characterisation of (2*R*,4'*R*)-1'-benzyl-4'-[1-(2-thienyl)vinyl]-2'*H*-spiro[indene-2,3'-piperidine]-1,2'(3*H*)-dione 2i

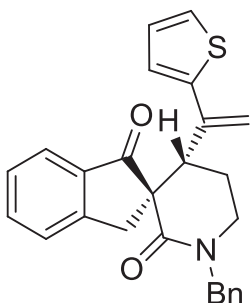

Synthesised from substrate **1a** (66 mg, 0.20 mmol) and 2-iodothiophene (63 mg, 0.30 mmol) according to the general procedure. Compound **2i** was obtained (single diastereomer, 58 mg, 70%) as a colourless oil after purification by flash column chromatography on silica gel (PE/EtOAc 2:1). Analysis of the  $^1\text{H}$  NMR spectrum of the crude reaction mixture showed a 40:1 dr.

The *ee* was determined by HPLC analysis using a Chiralcel AD column, hexane/isopropanol 60:40, 1.0 mL/min,  $\lambda = 230$  nm, major  $t_{\text{R}} = 6.47$  min, minor  $t_{\text{R}} = 16.80$  min (75% *ee*);  $[\alpha]_{\text{D}}^{25} = -42.8$  ( $c$  1.96,  $\text{CH}_2\text{Cl}_2$ ).

$^1\text{H}$  NMR (400 MHz,  $\text{CDCl}_3$ )  $\delta_{\text{H}}$  7.53 (ddd, 2H,  $J = 10.5$  Hz,  $J = 5.9$  Hz,  $J = 2.0$  Hz), 7.23-7.40 (m, 7H), 7.01 (dd, 1H,  $J = 4.5$  Hz,  $J = 1.6$  Hz), 6.82-6.84 (m, 2H), 5.49 (s, 1H), 4.94 (s, 1H), 4.73 (d, 1H,  $J$

= 14.6 Hz), 4.61 (d, 1H,  $J = 14.7$  Hz), 3.73 (d, 1H,  $J = 17.0$  Hz), 3.56 (dd, 1H,  $J = 8.2$  Hz,  $J = 3.3$  Hz), 3.38-3.51 (m, 2H), 3.32 (d, 1H,  $J = 17.1$  Hz), 2.59-2.66 (m, 1H), 1.84-1.92 (m, 1H);  $^{13}\text{C}$  NMR (100 MHz,  $\text{CDCl}_3$ )  $\delta_{\text{C}}$  204.9, 169.9, 154.3, 143.8, 141.3, 136.8, 135.6, 134.9, 128.7 (2C), 128.1 (2C), 127.5, 127.3, 127.1, 125.9, 124.9, 124.6, 124.5, 114.0, 60.1, 50.8, 45.2, 44.4, 37.2, 24.1; **FT-IR**  $\nu_{\text{max}}(\text{NaCl})/\text{cm}^{-1}$  2926 (C-H), 1714 (C=O), 1632 (NC=O), 1590 (C=C); **MS** (ESI+)  $m/z$  (rel. intensity %) 436.15 ( $\text{M} + \text{Na}^+$ , 75); **HRMS** (ESI+) calcd. for  $\text{C}_{26}\text{H}_{23}\text{NNaO}_2\text{S}$  [ $\text{M} + \text{Na}$ ] $^+$  436.1342, found 436.1345.

### Synthesis and characterisation of (2*R*,4'*S*)-1'-benzyl-4'-((*E*)-4-phenylbuta-1,3-dien-2-yl)spiro[indene-2,3'-piperidine]-1,2'(3*H*)-dione **2j**

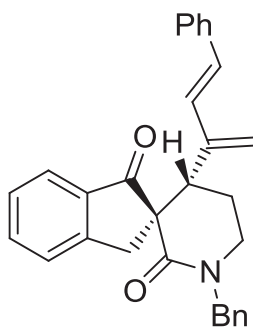

Synthesised from substrate **1a** (67 mg, 0.20 mmol) and (*E*)-(2-iodovinyl)benzene (69 mg, 0.30 mmol) according to the general procedure. Compound **2j** was obtained (single diastereomer, 53 mg, 61%) as a yellow oil after purification by flash column chromatography on silica gel (PE/EtOAc 1:1). Analysis of the  $^1\text{H}$  NMR spectrum of the crude reaction mixture showed a 21:1 dr.

The *ee* was determined by HPLC analysis using a Chiralcel AD column, hexane/isopropanol 60:40, 1.0 mL/min,  $\lambda = 230$  nm, major  $t_{\text{R}} = 6.13$  min, minor  $t_{\text{R}} = 8.74$  min (53% *ee*);  $[\alpha]_{\text{D}}^{25} = -10.1$  ( $c$  0.68,  $\text{CH}_2\text{Cl}_2$ ).

$^1\text{H}$  NMR (400 MHz,  $\text{CDCl}_3$ )  $\delta_{\text{H}}$  7.65 (d, 1H,  $J = 7.7$  Hz), 7.53 (t, 1H,  $J = 7.4$  Hz), 7.21-7.42 (m, 12H), 6.36-6.49 (m, 2H), 5.32 (s, 1H), 4.94 (s, 1H), 4.66 (dd, 2H,  $J = 14.6$  Hz,  $J = 9.6$  Hz), 3.72 (d, 1H,  $J = 17.1$  Hz), 3.35-3.50 (m, 3H), 3.26 (d, 1H,  $J = 17.1$  Hz), 2.56-2.63 (m, 1H), 1.82-1.90 (m, 1H);  $^{13}\text{C}$  NMR (100 MHz,  $\text{CDCl}_3$ )  $\delta_{\text{C}}$  205.3, 170.0, 154.3, 145.3, 136.9, 136.7, 135.9, 135.0, 129.7, 129.3, 128.7 (2C), 128.5 (2C), 128.1 (2C), 127.7, 127.4, 127.3, 126.5 (2C), 126.1, 124.6, 115.9, 59.9, 50.7, 45.3, 41.7, 37.1, 23.8; **FT-IR**  $\nu_{\text{max}}(\text{NaCl})/\text{cm}^{-1}$  2926 (C-H), 1712 (C=O), 1631 (NC=O), 1589 (C=C); **MS** (ESI+)  $m/z$  (rel. intensity %) 456.23 ( $\text{M} + \text{Na}^+$ , 100); **HRMS** (ESI+) calcd. for  $\text{C}_{30}\text{H}_{27}\text{NNaO}_2$  [ $\text{M} + \text{Na}$ ] $^+$  456.1934, found 456.1925.

### Synthesis and characterisation of (2*R*,4'*S*)-1'-benzyl-4'-((*Z*)-4-phenylbuta-1,3-dien-2-yl)spiro[indene-2,3'-piperidine]-1,2'(3*H*)-dione **2k**

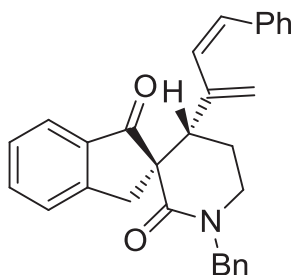

Synthesised from substrate **1a** (67 mg, 0.20 mmol) and (*Z*)-(2-iodovinyl)benzene (69 mg, 0.30 mmol) according to the general procedure. Compound **2k** was obtained (single diastereomer, 63 mg, 72%) as a colourless oil after purification by flash column chromatography on silica gel (PE/EtOAc 1:1). Analysis of the  $^1\text{H}$  NMR spectrum of the crude reaction mixture showed a 23:1 dr.

The *ee* was determined by HPLC analysis using a Chiralcel AD column, hexane/isopropanol 60:40, 1.0 mL/min,  $\lambda = 220$  nm, major  $t_{\text{R}} = 6.14$  min, minor  $t_{\text{R}} = 10.20$  min (77% *ee*);  $[\alpha]_{\text{D}}^{25} = -8.0$  ( $c$  0.20,  $\text{CH}_2\text{Cl}_2$ ).

**<sup>1</sup>H NMR** (500 MHz, CDCl<sub>3</sub>) δ<sub>H</sub> 7.77 (d, 1H, *J* = 7.7 Hz), 7.51-7.54 (m, 1H), 7.20-7.42 (m, 12H), 6.18 (d, 1H, *J* = 12.5 Hz), 5.69 (d, 1H, *J* = 12.5 Hz), 5.15 (s, 1H), 4.97 (s, 1H), 4.73 (d, 1H, *J* = 14.6 Hz), 4.46 (d, 1H, *J* = 14.6 Hz), 3.52 (d, 1H, *J* = 17.0 Hz), 3.34-3.42 (m, 2H), 3.22-3.27 (m, 2H), 2.15-2.19 (m, 1H), 1.83-1.95 (m, 1H); **<sup>13</sup>C NMR** (125 MHz, CDCl<sub>3</sub>) δ<sub>C</sub> 205.2, 170.6, 154.1, 143.6, 136.8, 136.7, 134.9, 131.0, 130.2, 128.7, 128.6 (2C), 128.3 (2C), 128.0, 127.9 (2C), 127.5, 127.4, 126.9, 126.5, 126.3, 124.5, 117.4, 60.1, 50.4, 45.8, 44.8, 36.5, 24.6; **FT-IR** ν<sub>max</sub>(NaCl)/cm<sup>-1</sup> 2925 (C-H), 1714 (C=O), 1632 (NC=O), 1590 (C=C); **MS** (ESI+) *m/z* (rel. intensity %) 456.23 (M + Na<sup>+</sup>, 100); **HRMS** (ESI+) calcd. for C<sub>30</sub>H<sub>27</sub>NNaO<sub>2</sub> [M + Na]<sup>+</sup> 456.1934, found 456.1927.

**Synthesis and characterisation of (2*R*,4'*S*)-1'-benzyl-4'-((*Z*)-4-(4-methoxyphenyl)buta-1,3-dien-2-yl)spiro[indene-2,3'-piperidine]-1,2'(3*H*)-dione **2I****

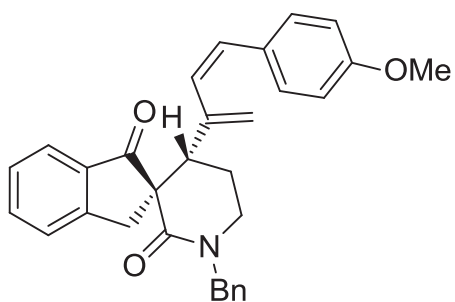

Synthesised from substrate **1a** (67 mg, 0.20 mmol) and (*Z*)-1-(2-iodovinyl)-4-methoxybenzene (78 mg, 0.30 mmol) according to the general procedure. Compound **2I** was obtained (single diastereomer, 62 mg, 67%) as a colourless oil after purification by flash column chromatography on silica gel (PE/EtOAc 1:1). Analysis of the <sup>1</sup>H NMR spectrum of the crude reaction mixture showed a 20:1 dr.

The *ee* was determined by HPLC analysis using a Chiralcel AD column, hexane/isopropanol 60:40, 1.0 mL/min, λ = 220 nm, major t<sub>R</sub> = 7.59 min, minor t<sub>R</sub> = 14.06 min (65% *ee*); [α]<sub>D</sub><sup>25</sup> = -10.7 (*c* 1.23, CH<sub>2</sub>Cl<sub>2</sub>).

**<sup>1</sup>H NMR** (500 MHz, CDCl<sub>3</sub>) δ<sub>H</sub> 7.64 (d, 1H, *J* = 7.7 Hz), 7.51-7.54 (m, 1H), 7.24-7.41 (m, 7H), 7.17 (dd, 2H, *J* = 9.3 Hz, *J* = 2.3 Hz), 6.79-6.81 (m, 2H), 6.32 (br s, 2H), 5.27 (s, 1H), 4.88 (s, 1H), 4.69 (d, 1H, *J* = 14.6 Hz), 4.61 (d, 1H, *J* = 14.6 Hz), 3.80 (s, 3H), 3.71 (d, 1H, *J* = 17.1 Hz), 3.36-3.44 (m, 3H), 3.26 (d, 1H, *J* = 17.1 Hz), 2.56-2.62 (m, 1H), 1.81-1.87 (m, 1H); **<sup>13</sup>C NMR** (125 MHz, CDCl<sub>3</sub>) δ<sub>C</sub> 205.4, 170.2, 159.3, 154.3, 145.4, 136.9, 135.9, 134.9, 129.5, 128.8, 128.6 (2C), 128.0 (2C), 127.7 (2C), 127.6, 127.4, 127.2, 126.0, 124.6, 114.9, 113.9 (2C), 59.9, 55.2, 50.7, 45.3, 41.7, 37.1, 23.8; **FT-IR** ν<sub>max</sub>(NaCl)/cm<sup>-1</sup> 2923 (C-H), 1718 (C=O), 1633 (NC=O), 1589 (C=C); **MS** (ESI+) *m/z* (rel. intensity %) 486.23 (M + Na<sup>+</sup>, 100); **HRMS** (ESI+) calcd. for C<sub>31</sub>H<sub>29</sub>NNaO<sub>3</sub> [M + Na]<sup>+</sup> 486.2040, found 486.2030.

### Synthesis and characterisation of (2*R*,4'*S*)-1'-benzyl-4'-((*Z*)-4-(4-chlorophenyl)buta-1,3-dien-2-yl)spiro[indene-2,3'-piperidine]-1,2'(3*H*)-dione **2m**

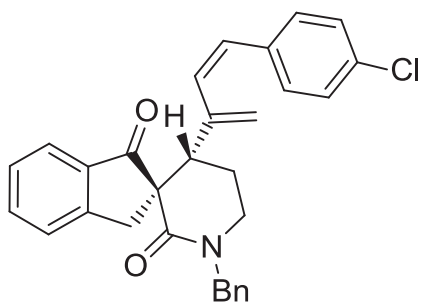

Synthesised from substrate **1a** (67 mg, 0.20 mmol) and (*Z*)-1-chloro-4-(2-iodovinyl)benzene (79 mg, 0.30 mmol) according to the general procedure. Compound **2m** was obtained (single diastereomer, 73 mg, 78%) as a colourless oil after purification by flash column chromatography on silica gel (PE/EtOAc 1:1). Analysis of the <sup>1</sup>H NMR spectrum of the crude reaction mixture showed a 18:1 dr.

The *ee* was determined by HPLC analysis using a Chiralcel AD column, hexane/isopropanol 70:30, 1.0 mL/min,  $\lambda = 230$  nm, major  $t_R = 8.33$  min, minor  $t_R = 20.44$  min (76% *ee*);  $[\alpha]_D^{25} = -13.4$  (*c* 0.53, CH<sub>2</sub>Cl<sub>2</sub>).

<sup>1</sup>H NMR (400 MHz, CDCl<sub>3</sub>)  $\delta_H$  7.76 (d, 1H, *J* = 7.7 Hz), 7.54 (dt, 1H, *J* = 7.5 Hz, *J* = 1.2 Hz), 7.27-7.41 (m, 7H), 6.99-7.02 (m, 2H), 6.81-6.84 (m, 2H), 6.09 (d, 1H, *J* = 12.5 Hz), 5.70 (dd, 1H, *J* = 12.5 Hz, *J* = 0.8 Hz), 5.14 (s, 1H), 5.00 (s, 1H), 4.77 (d, 1H, *J* = 14.6 Hz), 4.42 (d, 1H, *J* = 14.6 Hz), 3.49 (d, 1H, *J* = 17.1 Hz), 3.33-3.43 (m, 3H), 3.24 (dd, 1H, *J* = 11.6 Hz, *J* = 2.4 Hz), 2.09-2.15 (m, 1H), 1.87-1.97 (m, 1H); <sup>13</sup>C NMR (100 MHz, CDCl<sub>3</sub>)  $\delta_C$  205.2, 170.6, 153.9, 143.2, 136.8, 136.7, 135.2, 134.9, 132.5, 130.9, 129.6, 129.5 (2C), 128.7, 128.6, 128.1 (2C), 128.0 (2C), 127.6, 127.5, 126.3, 124.5, 117.7, 60.1, 50.4, 45.8, 44.8, 36.4, 24.7; FT-IR  $\nu_{max}$ (NaCl)/cm<sup>-1</sup> 2931 (C-H), 1713 (C=O), 1631 (NC=O), 1596 (C=C); MS (ESI+) *m/z* (rel. intensity %) 490.15 (M + Na<sup>+</sup>, 100); HRMS (ESI+) calcd. for C<sub>30</sub>H<sub>26</sub>ClNNaO<sub>2</sub> [M + Na]<sup>+</sup> 490.1544, found 490.1540.

### Synthesis and characterisation of (2*R*,4'*S*)-1'-benzyl-4'-((*Z*)-4-(3-nitrophenyl)buta-1,3-dien-2-yl)spiro[indene-2,3'-piperidine]-1,2'(3*H*)-dione **2n**

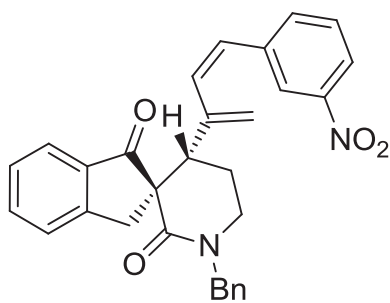

Synthesised from substrate **1a** (67 mg, 0.20 mmol) and (*Z*)-1-(2-iodovinyl)-3-nitrobenzene (82 mg, 0.30 mmol) according to the general procedure. Compound **2n** was obtained (single diastereomer, 74 mg, 77%) as a colourless oil after purification by flash column chromatography on silica gel (PE/EtOAc 1:1). Analysis of the <sup>1</sup>H NMR spectrum of the crude reaction mixture showed a 16:1 dr.

The *ee* was determined by HPLC analysis using a Chiralcel AD column, hexane/isopropanol 60:40, 1.0 mL/min,  $\lambda = 230$  nm, major  $t_R = 10.62$  min, minor  $t_R = 21.64$  min (73% *ee*);  $[\alpha]_D^{25} = -11.9$  (*c* 0.87, CH<sub>2</sub>Cl<sub>2</sub>).

<sup>1</sup>H NMR (400 MHz, CDCl<sub>3</sub>)  $\delta_H$  8.02 (d, 1H, *J* = 1.7 Hz), 7.92-7.95 (m, 1H), 7.72 (d, 1H, *J* = 7.7 Hz), 7.19-7.46 (m, 10H), 6.12 (d, 1H, *J* = 12.5 Hz), 5.82 (d, 1H, *J* = 12.5 Hz), 5.21 (s, 1H), 5.11 (s, 1H), 4.79 (d, 1H, *J* = 14.6 Hz), 4.40 (d, 1H, *J* = 14.6 Hz), 3.37-3.51 (m, 4H), 3.30 (dd, 1H, *J* = 11.7 Hz, *J* = 1.9 Hz), 2.14-2.19 (m, 1H), 1.93-2.05 (m, 1H); <sup>13</sup>C NMR (100 MHz, CDCl<sub>3</sub>)  $\delta_C$  205.3, 170.5, 153.7, 147.8, 143.2, 138.0, 136.8, 136.6, 134.8, 134.7, 133.5, 128.9, 128.7 (2C), 128.1 (3C), 127.6, 127.5, 126.4, 124.4, 122.7, 121.7, 118.0, 60.0, 50.4, 45.9, 44.8, 36.4, 24.7; FT-IR  $\nu_{max}$ (NaCl)/cm<sup>-1</sup> 2919 (C-

H), 1716 (C=O), 1631 (NC=O), 1589 (C=C); **MS** (ESI+)  $m/z$  (rel. intensity %) 501.20 (M + Na<sup>+</sup>, 100); **HRMS** (ESI+) calcd. for C<sub>30</sub>H<sub>26</sub>N<sub>2</sub>NaO<sub>4</sub> [M + Na]<sup>+</sup> 501.1785, found 501.1787.

### Synthesis and characterisation of methyl 4-((Z)-3-((2R,4'S)-1'-benzyl-1,2'-dioxo-1,3-dihydrospiro[indene-2,3'-piperidin]-4'-yl)buta-1,3-dien-1-yl)benzoate **2o**

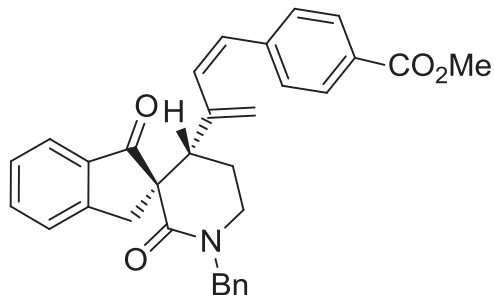

Synthesised from substrate **1a** (67 mg, 0.20 mmol) and (*Z*)-methyl 4-(2-iodovinyl)benzoate (86 mg, 0.30 mmol) according to the general procedure. Compound **2o** was obtained (single diastereomer, 67 mg, 68%) as a colourless oil after purification by flash column chromatography on silica gel (PE/EtOAc 1:1). Analysis of the <sup>1</sup>H NMR spectrum of the crude reaction mixture showed a 17:1 dr.

The *ee* was determined by HPLC analysis using a Chiralcel AD column, hexane/isopropanol 70:30, 1.0 mL/min,  $\lambda = 230$  nm, major  $t_R = 12.16$  min, minor  $t_R = 25.43$  min (82% *ee*);  $[\alpha]_D^{25} = -7.9$  (*c* 2.36, CH<sub>2</sub>Cl<sub>2</sub>).

<sup>1</sup>H NMR (500 MHz, CDCl<sub>3</sub>)  $\delta_H$  7.71-7.77 (m, 3H), 7.52-7.55 (m, 1H), 7.42 (d, 1H,  $J = 7.7$  Hz), 7.26-7.34 (m, 6H), 6.95 (d, 2H,  $J = 8.2$  Hz), 6.17 (d, 1H,  $J = 12.5$  Hz), 5.78 (d, 1H,  $J = 12.4$  Hz), 5.11 (s, 1H), 4.99 (s, 1H), 4.75 (d, 1H,  $J = 14.6$  Hz), 4.43 (d, 1H,  $J = 14.6$  Hz), 3.89 (s, 3H), 3.49 (d, 1H,  $J = 17.0$  Hz), 3.33-3.39 (m, 3H), 3.24 (dd, 1H,  $J = 11.6$  Hz,  $J = 2.1$  Hz), 2.09-2.14 (m, 1H), 1.89-1.97 (m, 1H); <sup>13</sup>C NMR (125 MHz, CDCl<sub>3</sub>)  $\delta_C$  205.2, 170.6, 166.8, 153.9, 143.1, 141.6, 136.8, 136.7, 135.0, 132.2, 129.9, 129.3 (2C), 128.7 (2C), 128.3, 128.2 (2C), 128.0 (2C), 127.7, 127.5, 126.3, 124.5, 118.0, 60.1, 52.0, 50.4, 45.9, 44.8, 36.3, 24.7; **FT-IR**  $\nu_{max}$ (NaCl)/cm<sup>-1</sup> 2950 (C-H), 1717 (C=O), 1632 (NC=O), 1608 (C=C); **MS** (ESI+)  $m/z$  (rel. intensity %) 492.24 (M + H<sup>+</sup>, 100); **HRMS** (ESI+) calcd. for C<sub>32</sub>H<sub>30</sub>NO<sub>4</sub> [M + H]<sup>+</sup> 492.2169, found 492.2168.

### Synthesis and characterisation of (2R,4'S)-1'-benzyl-4'-((Z)-4-(furan-2-yl)buta-1,3-dien-2-yl)spiro[indene-2,3'-piperidine]-1,2'(3H)-dione **2p**

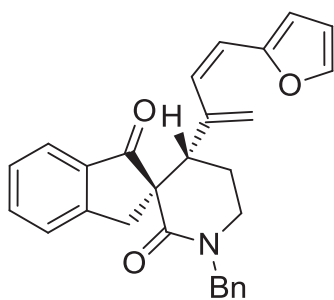

Synthesised from substrate **1a** (67 mg, 0.20 mmol) and (*Z*)-2-(2-iodovinyl)furan (66 mg, 0.30 mmol) according to the general procedure. Compound **2p** was obtained (single diastereomer, 59 mg, 70%) as a colourless oil after purification by flash column chromatography on silica gel (PE/EtOAc 1:1). Analysis of the <sup>1</sup>H NMR spectrum of the crude reaction mixture showed a 19:1 dr.

The *ee* was determined by HPLC analysis using a Chiralcel AD column, hexane/isopropanol 70:30, 1.0 mL/min,  $\lambda = 230$  nm, major  $t_R = 6.47$  min, minor  $t_R = 9.42$  min (71% *ee*);  $[\alpha]_D^{25} = -8.2$  (*c* 0.60, CH<sub>2</sub>Cl<sub>2</sub>).

<sup>1</sup>H NMR (400 MHz, CDCl<sub>3</sub>)  $\delta_H$  7.67 (d, 1H,  $J = 7.6$  Hz), 7.29-7.38 (m, 6H), 7.20 (dd, 2H,  $J = 15.3$  Hz,  $J = 7.6$  Hz), 7.04 (d, 1H,  $J = 1.8$  Hz), 6.14 (dd, 1H,  $J = 3.3$  Hz,  $J = 1.8$  Hz), 6.08 (d, 1H,  $J = 3.3$  Hz), 5.78 (d, 1H,  $J = 12.6$  Hz), 5.51 (d, 1H,  $J = 12.6$  Hz), 5.34 (s, 1H), 5.16 (s, 1H), 4.77 (d, 1H,  $J = 14.6$  Hz), 4.45 (d, 1H,  $J = 14.6$  Hz), 3.35-3.50 (m, 4H), 3.31 (dd, 1H,  $J = 11.2$  Hz,  $J = 2.3$  Hz), 2.21-

2.27 (m, 1H), 1.88-1.95 (m, 1H);  $^{13}\text{C}$  NMR (100 MHz,  $\text{CDCl}_3$ )  $\delta_{\text{C}}$  205.9, 170.8, 154.1, 151.4, 143.8, 141.2, 136.8, 136.7, 134.3, 128.6 (2C), 128.1 (2C), 127.7, 127.4, 127.1, 126.1, 124.1, 118.4, 116.6, 110.9, 110.5, 60.1, 50.5, 45.9, 45.1, 36.5, 24.4; FT-IR  $\nu_{\text{max}}$ (NaCl)/ $\text{cm}^{-1}$  2925 (C-H), 1713 (C=O), 1629 (NC=O), 1593 (C=C); MS (ESI+)  $m/z$  (rel. intensity %) 446.20 ( $\text{M} + \text{Na}^+$ , 100); HRMS (ESI+) calcd. for  $\text{C}_{28}\text{H}_{25}\text{NNaO}_3$  [ $\text{M} + \text{Na}$ ] $^+$  446.1727, found 446.1730.

### Synthesis and characterisation of (2*R*,4'*S*)-1'-benzyl-4'-((*Z*)-4-(thiophen-2-yl)buta-1,3-dien-2-yl)spiro[indene-2,3'-piperidine]-1,2'(3*H*)-dione **2q**

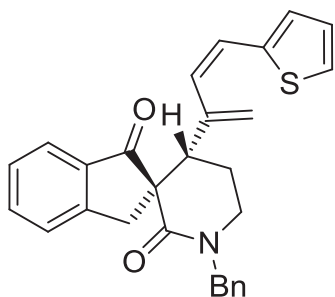

Synthesised from substrate **1a** (67 mg, 0.20 mmol) and (*Z*)-2-(2-iodovinyl)thiophene (71 mg, 0.30 mmol) according to the general procedure. Compound **2q** was obtained (single diastereomer, 57 mg, 65%) as a colourless oil after purification by flash column chromatography on silica gel (PE/EtOAc 1:1). Analysis of the  $^1\text{H}$  NMR spectrum of the crude reaction mixture showed a 18:1 dr.

The *ee* was determined by HPLC analysis using a Chiralcel AD column, hexane/isopropanol 60:40, 1.0 mL/min,  $\lambda = 230$  nm, major  $t_{\text{R}} = 8.17$  min, minor  $t_{\text{R}} = 11.25$  min (75% *ee*);  $[\alpha]_{\text{D}}^{25} = -14.3$  ( $c$  0.50,  $\text{CH}_2\text{Cl}_2$ ).

$^1\text{H}$  NMR (500 MHz,  $\text{CDCl}_3$ )  $\delta_{\text{H}}$  7.69 (d, 1H,  $J = 7.7$  Hz), 7.28-7.36 (m, 6H), 7.22 (dd, 1H,  $J = 11.0$  Hz,  $J = 3.8$  Hz), 7.16 (d, 1H,  $J = 7.6$  Hz), 7.01 (d, 1H,  $J = 5.1$  Hz), 6.77 (dd, 1H,  $J = 5.1$  Hz,  $J = 3.6$  Hz), 6.67 (d, 1H,  $J = 3.6$  Hz), 6.15 (d, 1H,  $J = 12.2$  Hz), 5.51 (d, 1H,  $J = 12.3$  Hz), 5.48 (s, 1H), 5.23 (s, 1H), 4.76 (d, 1H,  $J = 14.6$  Hz), 4.45 (d, 1H,  $J = 14.6$  Hz), 3.37-3.48 (m, 4H), 3.30 (dd, 1H,  $J = 10.9$  Hz,  $J = 2.3$  Hz), 2.27-2.32 (m, 1H), 1.92-2.00 (m, 1H);  $^{13}\text{C}$  NMR (100 MHz,  $\text{CDCl}_3$ )  $\delta_{\text{C}}$  205.8, 170.6, 153.9, 144.1, 138.6, 136.8, 134.4, 129.9, 128.6 (2C), 128.2, 128.1 (2C), 128.0, 127.4, 127.1, 126.3, 126.0, 125.1, 124.1, 123.9, 117.8, 60.1, 50.5, 45.9, 45.1, 36.7, 24.5; FT-IR  $\nu_{\text{max}}$ (NaCl)/ $\text{cm}^{-1}$  2924 (C-H), 1714 (C=O), 1630 (NC=O), 1590 (C=C); MS (ESI+)  $m/z$  (rel. intensity %) 440.20 ( $\text{M} + \text{H}^+$ , 100); HRMS (ESI+) calcd. for  $\text{C}_{28}\text{H}_{26}\text{NO}_2\text{S}$  [ $\text{M} + \text{H}$ ] $^+$  440.1679, found 440.1674.

### Synthesis and characterisation of (2*R*,4'*S*)-1'-benzyl-4'-[1-(3,5-dimethylphenyl)vinyl]-6-methyl-2'*H*-spiro[indene-2,3'-piperidine]-1,2'(3*H*)-dione **4a**

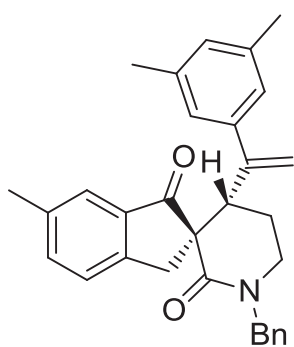

Synthesised from substrate **1b** (69 mg, 0.20 mmol) and 1-iodo-3,5-dimethylbenzene (70 mg, 0.30 mmol) according to the general procedure. Compound **4a** was obtained (single diastereomer, 75 mg, 84%) as a colourless oil after purification by flash column chromatography on silica gel (PE/EtOAc 2:1). Analysis of the  $^1\text{H}$  NMR spectrum of the crude reaction mixture showed a 26:1 dr.

The *ee* was determined by HPLC analysis using a Chiralcel AD column, hexane/isopropanol 60:40, 1.0 mL/min,  $\lambda = 230$  nm, major  $t_{\text{R}} = 4.21$  min, minor  $t_{\text{R}} = 6.47$  min (86% *ee*);  $[\alpha]_{\text{D}}^{25} = -23.4$  ( $c$  2.1,  $\text{CH}_2\text{Cl}_2$ ).



**<sup>1</sup>H NMR** (400 MHz, CDCl<sub>3</sub>) δ<sub>H</sub> 7.26-7.39 (m, 7H), 7.11 (s, 1H), 6.75 (s, 1H), 6.44 (s, 2H), 5.19 (s, 1H), 4.99 (s, 1H), 4.73 (d, 1H, *J* = 14.6 Hz), 4.56 (d, 1H, *J* = 14.6 Hz), 3.62 (dd, 1H, *J* = 9.9 Hz, *J* = 2.4 Hz), 3.48-3.54 (m, 2H), 3.40 (td, 1H, *J* = 12.2 Hz, *J* = 5.0 Hz), 3.29 (d, 1H, *J* = 16.8 Hz), 2.40 (ddd, 1H, *J* = 12.8 Hz, *J* = 7.7 Hz, *J* = 4.5 Hz), 2.32 (s, 3H), 2.12 (s, 6H), 1.79-1.89 (m, 1H); **<sup>13</sup>C NMR** (100 MHz, CDCl<sub>3</sub>) δ<sub>C</sub> 205.0, 170.6, 151.5, 149.3, 141.0, 137.1 (2C), 136.9, 136.7, 136.6, 135.8, 128.9, 128.7 (2C), 128.1 (2C), 127.4, 125.5, 125.1 (2C), 124.1, 114.9, 60.4, 50.6, 45.6, 44.5, 36.4, 24.6, 21.1 (2C), 20.9; **FT-IR** ν<sub>max</sub>(NaCl)/cm<sup>-1</sup> 2920 (C-H), 1716 (C=O), 1632 (NC=O), 1600 (C=C); **MS** (ESI+) *m/z* (rel. intensity %) 472.24 (M + Na<sup>+</sup>, 100); **HRMS** (ESI+) calcd. for C<sub>31</sub>H<sub>31</sub>NNaO<sub>2</sub> [M + Na]<sup>+</sup> 472.2247, found 472.2244.

**Synthesis and characterisation of (2*R*,4'*S*)-1'-benzyl-4'-[1-(3,5-dimethylphenyl)vinyl]-6-methoxy-2'*H*-spiro[indene-2,3'-piperidine]-1,2'(3*H*)-dione **4b****

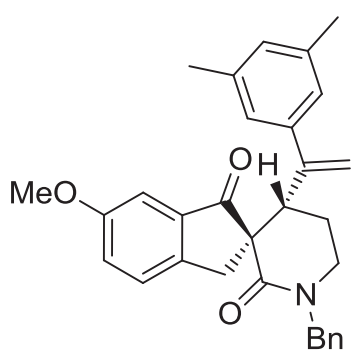

Synthesized from substrate **1c** (72 mg, 0.20 mmol) and 1-iodo-3,5-dimethylbenzene (70 mg, 0.30 mmol) according to the general procedure. Compound **4b** was obtained (single diastereomer, 76 mg, 82%) as a colourless solid after purification by flash column chromatography on silica gel (PE/EtOAc 2:1). Analysis of the <sup>1</sup>H NMR spectrum of the crude reaction mixture showed a 42:1 dr.

The *ee* was determined by HPLC analysis using a Chiralcel AD column, hexane/isopropanol 60:40, 1.0 mL/min, λ = 230 nm, major t<sub>R</sub> = 4.54 min, minor t<sub>R</sub> = 6.35 min (89% *ee*); [α]<sub>D</sub><sup>25</sup> = -31.0 (*c* 2.8, CH<sub>2</sub>Cl<sub>2</sub>).

**Mp** 55 - 57 °C; **<sup>1</sup>H NMR** (400 MHz, CDCl<sub>3</sub>) δ<sub>H</sub> 7.30-7.39 (m, 5H), 7.26 (d, 1H, *J* = 8.0 Hz), 7.13 (dd, 1H, *J* = 8.3 Hz, *J* = 2.5 Hz), 6.73 (s, 1H), 6.69 (d, 1H, *J* = 2.3 Hz), 6.42 (br s, 2H), 5.18 (s, 1H), 5.00 (s, 1H), 4.76 (d, 1H, *J* = 14.6 Hz), 4.54 (d, 1H, *J* = 14.6 Hz), 3.74 (s, 3H), 3.63-3.65 (m, 1H), 3.52 (m, 1H), 3.44 (d, 1H, *J* = 16.8 Hz), 3.37-3.41 (m, 1H), 3.25 (d, 1H, *J* = 16.6 Hz), 2.32-2.36 (m, 1H), 2.13 (s, 6H), 1.87 (m, 1H); **<sup>13</sup>C NMR** (100 MHz, CDCl<sub>3</sub>) δ<sub>C</sub> 204.9, 170.7, 159.0, 149.3, 147.1, 140.9, 137.8, 137.1 (2C), 136.9, 129.0, 128.7 (2C), 128.1 (2C), 127.4, 126.5, 125.1 (2C), 124.1, 115.1, 105.2, 60.9, 55.4, 50.6, 45.8, 44.5, 36.0, 24.9, 21.1 (2C); **FT-IR** ν<sub>max</sub>(NaCl)/cm<sup>-1</sup> 2929 (C-H), 1715 (C=O), 1632 (NC=O), 1600 (C=C); **MS** (ESI+) *m/z* (rel. intensity %) 488.24 (M + Na<sup>+</sup>, 100); **HRMS** (ESI+) calcd. for C<sub>31</sub>H<sub>31</sub>NNaO<sub>3</sub> [M + Na]<sup>+</sup> 488.2196, found 488.2198.

### Synthesis and characterisation of (2*R*,4'*S*)-1'-benzyl-4'-[1-(3,5-dimethylphenyl)vinyl]-4-(trifluoromethyl)-2'*H*-spiro[indene-2,3'-piperidine]-1,2'(3*H*)-dione **4c**

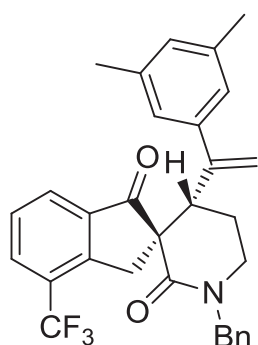

Synthesised from substrate **1d** (79 mg, 0.20 mmol) and 1-iodo-3,5-dimethylbenzene (70 mg, 0.30 mmol) according to the general procedure. Compound **4c** was obtained (single diastereomer, 80 mg, 80%) as a colourless oil after purification by flash column chromatography on silica gel (PE/EtOAc 1:2). Analysis of the  $^1\text{H}$  NMR spectrum of the crude reaction mixture showed a 28:1 dr.

The *ee* was determined by HPLC analysis using a Chiralcel AD column, hexane/isopropanol 60:40, 1.0 mL/min,  $\lambda = 230$  nm, major  $t_{\text{R}} = 4.10$  min, minor  $t_{\text{R}} = 10.68$  min (86% *ee*);  $[\alpha]_{\text{D}}^{25} = -2.7$  (*c* 2.88,  $\text{CH}_2\text{Cl}_2$ ).

$^1\text{H}$  NMR (400 MHz,  $\text{CDCl}_3$ )  $\delta_{\text{H}}$  7.74 (d, 1H,  $J = 7.5$  Hz), 7.30-7.40 (m, 6H), 7.23-7.27 (m, 1H), 6.64 (s, 1H), 6.37 (s, 2H), 5.21 (s, 1H), 5.07 (s, 1H), 4.70 (d, 1H,  $J = 14.6$  Hz), 4.60 (d, 1H,  $J = 14.6$  Hz), 3.75 (d, 1H,  $J = 11.1$  Hz), 3.58-3.62 (m, 1H), 3.55 (d, 2H,  $J = 4.0$  Hz), 3.39-3.44 (m, 1H), 2.29 (dd, 1H,  $J = 13.4$  Hz,  $J = 2.9$  Hz), 2.06 (s, 6H), 1.89-2.01 (m, 1H);  $^{13}\text{C}$  NMR (100 MHz,  $\text{CDCl}_3$ )  $\delta_{\text{C}}$  204.4, 170.4, 151.7, 149.1, 140.2, 137.9, 137.0 (2C), 136.6, 130.6, 130.5, 129.2, 128.8 (2C), 128.1 (2C), 127.6, 127.3, 127.2, 125.4 (2C), 125.2, 115.5, 59.9, 50.7, 46.0, 44.6, 35.4, 25.2), 21.0 (2C); FT-IR  $\nu_{\text{max}}(\text{NaCl})/\text{cm}^{-1}$  2920 (C-H), 1726 (C=O), 1633 (NC=O), 1596 (C=C); MS (ESI+)  $m/z$  (rel. intensity %) 526.21 ( $\text{M} + \text{Na}^+$ , 100); HRMS (ESI+) calcd. for  $\text{C}_{31}\text{H}_{28}\text{F}_3\text{NNaO}_2$  [ $\text{M} + \text{Na}$ ] $^+$  526.1964, found 526.1968.

### Synthesis and characterisation of (2*R*,4'*S*)-1'-benzyl-4'-[1-(3,5-dimethylphenyl)vinyl]-5-fluoro-2'*H*-spiro[indene-2,3'-piperidine]-1,2'(3*H*)-dione **4d**

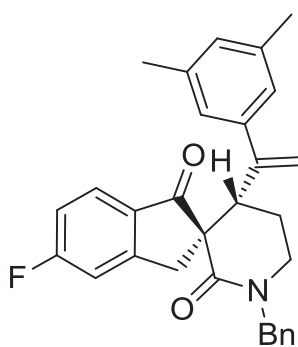

Synthesised from substrate **1e** (70 mg, 0.20 mmol) and 1-iodo-3,5-dimethylbenzene (70 mg, 0.30 mmol) according to the general procedure. Compound **4d** was obtained (single diastereomer, 72 mg, 80%) as a colourless solid after purification by flash column chromatography on silica gel (PE/EtOAc 2:1). Analysis of the  $^1\text{H}$  NMR spectrum of the crude reaction mixture showed a 21:1 dr.

The *ee* was determined by HPLC analysis using a Chiralcel AD column, hexane/isopropanol 60:40, 1.0 mL/min,  $\lambda = 230$  nm, major  $t_{\text{R}} = 4.70$  min, minor  $t_{\text{R}} = 12.89$  min (87% *ee*);  $[\alpha]_{\text{D}}^{25} = -15.3$  (*c* 2.8,  $\text{CH}_2\text{Cl}_2$ ).

**Mp** 122 - 126 °C;  $^1\text{H}$  NMR (400 MHz,  $\text{CDCl}_3$ )  $\delta_{\text{H}}$  7.33 (m, 6H), 7.04 (dd, 1H,  $J = 8.4$  Hz,  $J = 0.9$  Hz), 6.88 (dt, 1H,  $J = 8.7$  Hz,  $J = 2.0$  Hz), 6.73 (s, 1H), 6.47 (s, 2H), 5.22 (s, 1H), 5.01 (s, 1H), 4.70 (d, 1H,  $J = 14.6$  Hz), 4.58 (d, 1H,  $J = 14.6$  Hz), 3.66 (dd, 1H,  $J = 10.1$  Hz,  $J = 2.0$  Hz), 3.49-3.56 (m, 2H), 3.38-3.43 (m, 1H), 3.31 (d, 1H,  $J = 17.2$  Hz), 2.35-2.41 (ddd, 1H,  $J = 12.8$  Hz,  $J = 7.2$  Hz,  $J = 4.2$  Hz), 2.13 (s, 6H), 1.85 (dtd, 1H,  $J = 15.1$  Hz,  $J = 10.1$  Hz,  $J = 5.1$  Hz);  $^{13}\text{C}$  NMR (100 MHz,  $\text{CDCl}_3$ )  $\delta_{\text{C}}$  203.1, 170.4, 165.8, 157.2, 149.2, 140.6, 137.2 (2C), 136.8, 132.9, 129.2, 128.7 (2C), 128.1 (2C), 127.5, 126.4, 125.1 (2C), 115.3, 115.1, 112.4, 60.4, 50.7, 45.7, 44.4, 36.5, 24.7 19.4 (2C); FT-IR  $\nu_{\text{max}}(\text{NaCl})/\text{cm}^{-1}$  2921 (C-H), 1719 (C=O), 1632 (NC=O), 1594 (C=C); MS (ESI+)  $m/z$  (rel. intensity

%) 476.21 ( $M + Na^+$ , 85); **HRMS** (ESI+) calcd. for  $C_{30}H_{28}FNNaO_2$  [ $M + Na$ ] $^+$  476.1996, found 476.2000.

### Synthesis and characterisation of (2*R*,4'*S*)-1'-benzyl-5-bromo-4'-[1-(3,5-dimethylphenyl)vinyl]-2'*H*-spiro[indene-2,3'-piperidine]-1,2'(3*H*)-dione **4e**

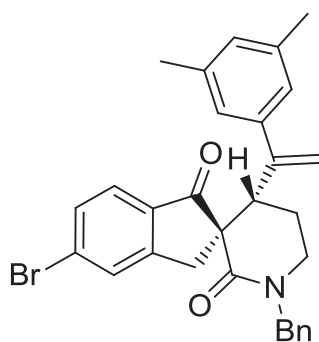

Synthesised from substrate **1f** (81 mg, 0.20 mmol) and 1-iodo-3,5-dimethylbenzene (70 mg, 0.30 mmol) according to the general procedure. Compound **4e** was obtained (single diastereomer, 60 mg, 58%) as a colourless solid after purification by flash column chromatography on silica gel (PE/EtOAc 2:1). Analysis of the  $^1H$  NMR spectrum of the crude reaction mixture showed a 32:1 dr.

The *ee* was determined by HPLC analysis using a Chiralcel AD column, hexane/isopropanol 60:40, 1.0 mL/min,  $\lambda = 230$  nm, major  $t_R = 5.23$  min, minor  $t_R = 13.95$  min (86% *ee*);  $[\alpha]_D^{25} = +37.7$  (*c* 0.98,  $CH_2Cl_2$ ).

**Mp** 131 - 135 °C;  $^1H$  NMR (400 MHz,  $CDCl_3$ )  $\delta_H$  7.55 (s, 1H), 7.35-7.39 (m, 2H), 7.27-7.32 (m, 4H), 7.10 (d, 1H,  $J = 8.1$  Hz), 6.71 (s, 1H), 6.43 (s, 2H), 5.21 (s, 1H), 5.01 (s, 1H), 4.70 (d, 1H,  $J = 14.6$  Hz), 4.57 (d, 1H,  $J = 14.6$  Hz), 3.66 (dd, 1H,  $J = 10.5$  Hz,  $J = 1.5$  Hz), 3.52-3.57 (m, 1H), 3.48 (d, 1H,  $J = 17.3$  Hz), 3.40 (td, 1H,  $J = 12.2$  Hz,  $J = 4.6$  Hz), 3.30 (d, 1H,  $J = 17.2$  Hz), 2.31-2.37 (m, 1H) 2.12 (s, 6H), 1.86 (ddt, 1H,  $J = 15.6$  Hz,  $J = 10.5$  Hz,  $J = 5.1$  Hz);  $^{13}C$  NMR (100 MHz,  $CDCl_3$ )  $\delta_C$  204.0, 170.4, 155.8, 149.2, 140.4, 137.2 (2C), 136.7, 135.4, 130.5, 129.7, 129.1, 128.9, 128.7 (2C), 128.1 (2C), 127.5, 125.3 (2C), 125.1, 115.2, 60.2, 50.7, 45.8, 44.5, 36.3, 24.9, 21.1 (2C); **FT-IR**  $\nu_{max}$ (NaCl)/ $cm^{-1}$  2921 (C-H), 1720 (C=O), 1633 (NC=O), 1597 (C=C); **MS** (ESI+)  $m/z$  (rel. intensity %) 536.14, 538.13 ( $M + Na^+$ , 100); **HRMS** (ESI+) calcd. for  $C_{30}H_{28}BrNNaO_2$  [ $M + Na$ ] $^+$  536.1196, 538.1177, found 536.1201, 538.1175.

### Synthesis and characterisation of (2*R*,4'*S*)-1'-benzyl-5-chloro-4'-[1-(3,5-dimethylphenyl) vinyl]-2'*H*-spiro[indene-2,3'-piperidine]-1,2'(3*H*)-dione **4f**

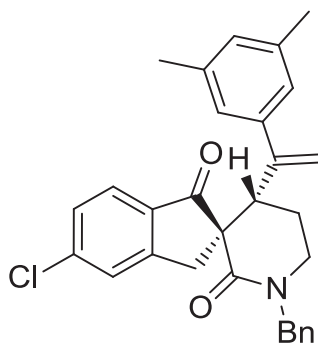

Synthesised from substrate **1g** (73 mg, 0.20 mmol) and 1-iodo-3,5-dimethylbenzene (70 mg, 0.30 mmol) according to the general procedure. Compound **4f** was obtained (single diastereomer, 75 mg, 80%) as a colourless solid after purification by flash column chromatography on silica gel (PE/EtOAc 2:1). Analysis of the  $^1H$  NMR spectrum of the crude reaction mixture showed a 53:1 dr.

The *ee* was determined by HPLC analysis using a Chiralcel AD column, hexane/isopropanol 60:40, 1.0 mL/min,  $\lambda = 230$  nm, major  $t_R = 4.95$  min, minor  $t_R = 13.48$  min (84% *ee*);  $[\alpha]_D^{25} = +32.0$  (*c* 3.35,  $CH_2Cl_2$ ).

**Mp** 170 - 174 °C;  $^1H$  NMR (400 MHz,  $CDCl_3$ )  $\delta_H$  7.36-7.39 (m, 3H), 7.29-7.33 (m, 3H), 7.13-7.19 (m, 2H), 6.72 (s, 1H), 6.44 (s, 2H), 5.22 (s, 1H), 5.02 (s, 1H), 4.70 (d, 1H,  $J = 14.6$  Hz), 4.58 (d, 1H,  $J = 14.6$  Hz), 3.67 (dd, 1H,  $J = 10.6$  Hz,  $J = 1.8$  Hz), 3.52-3.57 (m, 1H), 3.48 (d, 1H,  $J = 17.2$  Hz), 3.36-3.43 (m, 1H), 3.31 (d, 1H,  $J = 17.2$  Hz), 2.32-2.38 (m, 1H), 2.13 (s, 6H), 1.82-1.91 (m, 1H);  $^{13}C$  NMR

(100 MHz, CDCl<sub>3</sub>)  $\delta_C$  203.7, 170.4, 155.7, 149.2, 140.9, 140.5, 137.2 (2C), 136.7, 135.0, 129.2, 128.7 (2C), 128.1 (2C), 127.7, 127.5, 125.9, 125.3 (2C), 125.1, 115.2, 60.3, 50.7, 45.8, 44.5, 36.4, 24.8, 21.1 (2C); **FT-IR**  $\nu_{\max}$ (NaCl)/cm<sup>-1</sup> 2920 (C-H), 1719 (C=O), 1632 (NC=O), 1600 (C=C); **MS** (ESI+)  $m/z$  (rel. intensity %) 492.19 (M + Na<sup>+</sup>, 100); **HRMS** (ESI+) calcd. for C<sub>30</sub>H<sub>28</sub>CINNaO<sub>2</sub> [M + Na]<sup>+</sup> 492.1701, found 492.1700.

### Synthesis and characterisation of (2*R*,4'*S*)-4'-[1-(3,5-dimethylphenyl)vinyl]-1'-propyl-2'*H*-spiro[indene-2,3'-piperidine]-1,2'(3*H*)-dione **4g**

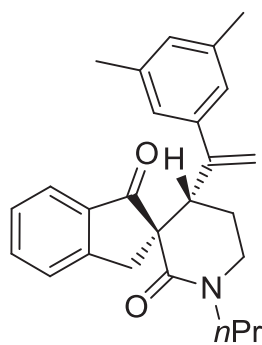

Synthesised from substrate **1h** (57 mg, 0.20 mmol) and 1-iodo-3,5-dimethylbenzene (70 mg, 0.30 mmol) according to the general procedure. Compound **4g** was obtained (single diastereomer, 56 mg, 72%) as a colourless solid after purification by flash column chromatography on silica gel (PE/EtOAc 2:1). Analysis of the <sup>1</sup>H NMR spectrum of the crude reaction mixture showed a 40:1 dr.

The *ee* was determined by HPLC analysis using a Chiralcel AD column, hexane/isopropanol 60:40, 1.0 mL/min,  $\lambda$  = 230 nm, major  $t_R$  = 3.81 min, minor  $t_R$  = 11.82 min (89% *ee*),  $[\alpha]_D^{25}$  = -3.2 (*c* 2.4, CH<sub>2</sub>Cl<sub>2</sub>).

**Mp** 106 - 109 °C; **<sup>1</sup>H NMR** (400 MHz, CDCl<sub>3</sub>)  $\delta_H$  7.47-7.51 (m, 1H), 7.36 (d, 1H, *J* = 7.7 Hz), 7.29 (t, 1H, *J* = 8.3 Hz), 7.17 (t, 1H, *J* = 7.4 Hz), 6.72 (s, 1H), 6.46 (s, 2H), 5.22 (s, 1H), 5.02 (s, 1H), 3.57-3.63 (m, 2H), 3.43-3.52 (m, 2H), 3.33-3.39 (m, 2H), 3.29 (d, 1H, *J* = 17.0 Hz), 2.43-2.49 (m, 1H), 2.11 (s, 6H), 1.83-1.93 (m, 1H), 1.63 (qt, 2H, *J* = 14.2 Hz, *J* = 7.0 Hz), 0.93 (t, 3H, *J* = 7.4 Hz); **<sup>13</sup>C NMR** (100 MHz, CDCl<sub>3</sub>)  $\delta_C$  205.1, 170.0, 154.3, 149.4, 140.9, 137.1 (2C), 136.3, 134.3, 129.1, 126.8, 125.7, 125.1 (2C), 124.1, 114.8, 59.9, 49.4, 46.3, 44.5, 36.7, 24.6, 21.1 (2C), 20.2, 11.3; **FT-IR**  $\nu_{\max}$ (NaCl)/cm<sup>-1</sup> 2929 (C-H), 1718 (C=O), 1632 (NC=O), 1588 (C=C); **MS** (ESI+)  $m/z$  (rel. intensity %) 410.23 (M + Na<sup>+</sup>, 100); **HRMS** (ESI+) calcd. for C<sub>26</sub>H<sub>29</sub>NNaO<sub>2</sub> [M + Na]<sup>+</sup> 410.2091, found 410.2088.

### Synthesis and characterisation of (2*R*,4'*S*)-4'-[1-(3,5-dimethylphenyl)vinyl]-1'-isopropyl-2'*H*-spiro[indene-2,3'-piperidine]-1,2'(3*H*)-dione **4h**

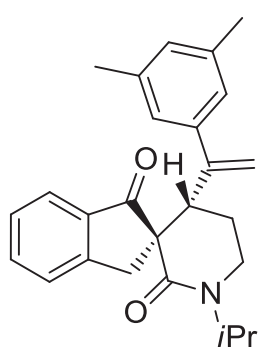

Synthesised from substrate **1i** (57 mg, 0.20 mmol) and 1-iodo-3,5-dimethylbenzene (70 mg, 0.30 mmol) according to the general procedure. Compound **4h** was obtained (single diastereomer, 65 mg, 84%) as a colourless oil after purification by flash column chromatography on silica gel (PE/EtOAc 2:1). Analysis of the <sup>1</sup>H NMR spectrum of the crude reaction mixture showed a 29:1 dr.

The *ee* was determined by HPLC analysis using a Chiralcel AD column, hexane/isopropanol 60:40, 1.0 mL/min,  $\lambda$  = 230 nm, major  $t_R$  = 3.74 min, minor  $t_R$  = 5.52 min (86% *ee*);  $[\alpha]_D^{25}$  = +0.4 (*c* 3.9, CH<sub>2</sub>Cl<sub>2</sub>).

**<sup>1</sup>H NMR** (400 MHz, CDCl<sub>3</sub>) δ<sub>H</sub> 7.46-7.50 (m, 1H), 7.35 (d, 1H, *J* = 7.7 Hz), 7.28 (d, 1H, *J* = 7.8 Hz), 7.15 (t, 1H, *J* = 7.4 Hz), 6.71 (s, 1H), 6.45 (s, 2H), 5.21 (s, 1H), 5.02 (s, 1H), 4.83 (sept., 1H, *J* = 6.8 Hz), 3.58 (dd, 1H, *J* = 2.0 Hz, *J* = 10.1 Hz), 3.41-3.49 (m, 3H), 3.28 (d, 1H, *J* = 17.0 Hz), 2.42-2.49 (m, 1H), 2.10 (s, 6H), 1.78-1.88 (m, 1H), 1.21 (d, 3H, *J* = 6.9 Hz), 1.14 (d, 3H, *J* = 6.8 Hz); **<sup>13</sup>C NMR** (100 MHz, CDCl<sub>3</sub>) δ<sub>C</sub> 205.2, 169.7, 154.3, 149.6, 140.9, 137.1 (2C), 136.4, 134.3, 129.1, 126.8, 125.7, 125.1 (2C), 124.1, 114.7, 60.2, 44.8, 44.2, 39.3, 36.9, 24.8, 21.1 (2C), 19.3, 19.0; **FT-IR** ν<sub>max</sub>(NaCl)/cm<sup>-1</sup> 2923 (C-H), 1718 (C=O), 1624 (NC=O), 1586 (C=C); **MS** (ESI+) *m/z* (rel. intensity %) 410.24 (M + Na<sup>+</sup>, 100); **HRMS** (ESI+) calcd. for C<sub>26</sub>H<sub>29</sub>NNaO<sub>2</sub> [M + Na]<sup>+</sup> 410.2091, found 410.2097.

### Synthesis and characterisation of (2*R*,4'*S*)-1'-benzyl-4'-[1-(3,5-dimethylphenyl)vinyl]-2'*H*-spiro[indene-2,3'-piperidine]-1,2'(3*H*)-dione **4i**

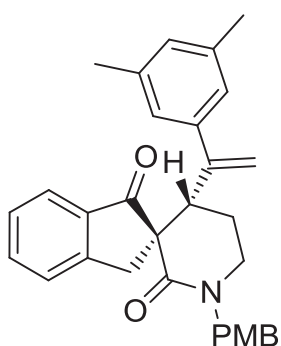

Synthesised from substrate **1j** (72 mg, 0.20 mmol) and 1-iodo-3,5-dimethylbenzene (70 mg, 0.30 mmol) according to the general procedure. Compound **4i** was obtained (single diastereomer, 67 mg, 72%) as a colourless solid after purification by flash column chromatography on silica gel (PE/EtOAc 1:1). Analysis of the <sup>1</sup>H NMR spectrum of the crude reaction mixture showed a 41:1 dr.

The *ee* was determined by HPLC analysis using a Chiralcel AD column, hexane/isopropanol 60:40, 1.0 mL/min, λ = 230 nm, major t<sub>R</sub> = 5.02 min, minor t<sub>R</sub> = 16.60 min (88% *ee*); [α]<sub>D</sub><sup>25</sup> = -13.2 (*c* 2.26, CH<sub>2</sub>Cl<sub>2</sub>).

**Mp** 135 - 139 °C; **<sup>1</sup>H NMR** (400 MHz, CDCl<sub>3</sub>) δ<sub>H</sub> 7.52 (t, 1H, *J* = 7.4 Hz), 7.38 (d, 1H, *J* = 7.6 Hz), 7.33 (d, 1H, *J* = 7.6 Hz), 7.25-7.27 (m, 2H), 7.19 (t, 1H, *J* = 7.4 Hz), 6.90 (d, 2H, *J* = 8.5 Hz), 6.73 (s, 1H), 6.44 (s, 2H), 5.19 (s, 1H), 4.99 (s, 1H), 4.64 (d, 1H, *J* = 14.4 Hz), 4.51 (d, 1H, *J* = 14.4 Hz), 3.82 (s, 3H), 3.62 (dd, 1H, *J* = 10.0 Hz, *J* = 2.5 Hz), 3.55 (d, 1H, *J* = 17.0 Hz), 3.46-3.52 (m, 1H), 3.37-3.42 (m, 1H), 3.32 (d, 1H, *J* = 17.0 Hz), 2.37-2.43 (m, 1H), 2.11 (s, 6H), 1.78-1.88 (m, 1H); **<sup>13</sup>C NMR** (100 MHz, CDCl<sub>3</sub>) δ<sub>C</sub> 205.0, 170.4, 159.0, 154.2, 149.3, 140.8, 137.1 (2C), 136.3, 134.4, 129.5 (2C), 129.1, 129.0, 126.9, 125.8, 125.1 (2C), 124.2, 114.9, 114.0 (2C), 60.0, 55.3, 50.1, 45.4, 44.4, 36.8, 24.6, 21.1 (2C); **FT-IR** ν<sub>max</sub>(NaCl)/cm<sup>-1</sup> 2930 (C-H), 1955 (C=C=C), 1717 (C=O), 1630 (C=O); **MS** (ESI+) *m/z* (rel. intensity %) 488.24 (M + Na<sup>+</sup>, 100); **HRMS** (ESI+) calcd. for C<sub>31</sub>H<sub>31</sub>NNaO<sub>3</sub> [M + Na]<sup>+</sup> 488.2196, found 488.2191.

### Synthesis and characterisation of (2*R*,4'*S*)-1'-benzyl-5-bromo-4'-[1-(3,5-dimethylphenyl) vinyl]-2'*H*-spiro[indene-2,3'-piperidine]-1,2'(3*H*)-dione **4j**

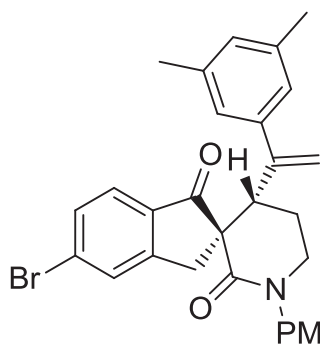

Synthesised from substrate **1k** (88 mg, 0.20 mmol) and 1-iodo-3,5-dimethylbenzene (70 mg, 0.30 mmol) according to the general procedure. Compound **4j** was obtained (single diastereomer, 78 mg, 72%) as a colourless solid after purification by flash column chromatography on silica gel (PE/EtOAc 1:1). Analysis of the <sup>1</sup>H NMR spectrum of the crude reaction mixture showed a 41:1 dr.

The *ee* was determined by HPLC analysis using a Chiralcel AD column, hexane/isopropanol 60:40, 1.0 mL/min,  $\lambda = 230$  nm, major  $t_R = 7.05$  min, minor  $t_R = 15.30$  min (81% *ee*);  $[\alpha]_D^{25} = -33.5$  (*c* 1.68, CH<sub>2</sub>Cl<sub>2</sub>).

**Mp** 124 - 127 °C; <sup>1</sup>H NMR (400 MHz, CDCl<sub>3</sub>)  $\delta_H$  7.54 (s, 1H), 7.24-7.31 (m, 3H), 7.10 (d, 1H, *J* = 8.1 Hz), 6.90 (d, 2H, *J* = 8.6 Hz), 6.71 (s, 1H), 6.43 (s, 2H), 5.20 (s, 1H), 5.00 (s, 1H), 4.63 (d, 1H, *J* = 14.4 Hz), 4.49 (d, 1H, *J* = 14.4 Hz), 3.82 (s, 3H), 3.63-3.65 (m, 1H), 3.50-3.55 (m, 1H), 3.46 (d, 1H, *J* = 16.4 Hz), 3.36-3.45 (m, 1H), 3.28 (d, 1H, *J* = 17.2 Hz), 2.30-2.35 (m, 1H), 2.12 (s, 6H), 1.79-1.89 (m, 1H); <sup>13</sup>C NMR (100 MHz, CDCl<sub>3</sub>)  $\delta_C$  204.0, 170.2, 159.1, 155.9, 149.3, 144.4, 137.2, 135.4, 130.5 (2C), 129.7, 129.5 (2C), 129.1, 128.9, 128.8, 125.3 (2C), 125.1, 115.1, 114.1 (2C), 60.2, 55.3, 50.1, 45.6, 44.5, 36.3, 24.9, 21.1 (2C); **FT-IR**  $\nu_{max}$ (NaCl)/cm<sup>-1</sup> 2920 (C-H), 1719 (C=O), 1631 (NC=O), 1597 (C=C); **MS** (ESI+) *m/z* (rel. intensity %) 566.15, 568.15 (M + Na<sup>+</sup>, 100); **HRMS** (ESI+) calcd. for C<sub>31</sub>H<sub>30</sub>BrNNaO<sub>3</sub> [M + Na]<sup>+</sup> 566.1301, 568.1283, found 566.1297, 568.1284.

### Synthesis and characterisation of methyl 4-((*Z*)-3-((2*R*,4'*S*)-1'-benzyl-6-methoxy-1,2'-dioxo-1,3-dihydrospiro[indene-2,3'-piperidin]-4'-yl)buta-1,3-dien-1-yl)benzoate **4k**

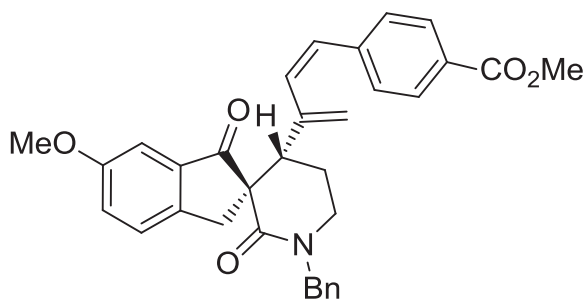

Synthesised from substrate **1c** (73 mg, 0.20 mmol) and (*Z*)-methyl 4-(2-iodovinyl)benzoate (86 mg, 0.30 mmol) according to the general procedure. Compound **4k** was obtained (single diastereomer, 59 mg, 81%) as a colourless oil after purification by flash column chromatography on silica gel (PE/EtOAc 1:1). Analysis of the <sup>1</sup>H NMR spectrum of the crude reaction mixture showed a 18:1 dr.

The *ee* was determined by HPLC analysis using a Chiralcel AD column, hexane/isopropanol 70:30, 1.0 mL/min,  $\lambda = 230$  nm, major  $t_R = 11.80$  min, minor  $t_R = 20.80$  min (76% *ee*);  $[\alpha]_D^{25} = -13.9$  (*c* 0.54, CH<sub>2</sub>Cl<sub>2</sub>).

<sup>1</sup>H NMR (500 MHz, CDCl<sub>3</sub>)  $\delta_H$  7.72-7.74 (m, 2H), 7.25-7.36 (m, 6H), 7.18 (d, 1H, *J* = 2.5 Hz), 7.10-7.13 (m, 1H), 6.99-7.01 (m, 2H), 6.19 (d, 1H, *J* = 12.5 Hz), 5.79 (d, 1H, *J* = 12.5 Hz), 5.12 (s, 1H), 5.00 (s, 1H), 4.77 (d, 1H, *J* = 14.6 Hz), 4.40 (d, 1H, *J* = 14.6 Hz), 3.90 (s, 3H), 3.80 (s, 3H), 3.28-3.39 (m, 4H), 3.25 (dd, 1H, *J* = 11.6 Hz, *J* = 2.1 Hz), 2.06-2.11 (m, 1H), 1.88-1.96 (m, 1H); <sup>13</sup>C NMR (125 MHz, CDCl<sub>3</sub>)  $\delta_C$  205.1, 170.6, 166.7, 159.6, 146.8, 143.2, 141.6, 138.0, 136.7, 132.3, 129.8, 129.7, 129.3 (2C), 128.7 (2C), 128.4, 128.2, 128.1 (2C), 127.4, 127.0, 124.5, 117.9, 105.5, 60.8, 55.6, 52.0

50.4, 45.9, 44.7, 35.7, 29.7; **FT-IR**  $\nu_{\max}$ (NaCl)/ $\text{cm}^{-1}$  2924 (C-H), 1715 (C=O), 1632 (NC=O), 1590 (C=C); **MS** (ESI+)  $m/z$  (rel. intensity %) 544.23 (M + Na<sup>+</sup>, 100); **HRMS** (ESI+) calcd. for C<sub>33</sub>H<sub>31</sub>NNaO<sub>5</sub> [M + Na]<sup>+</sup> 544.2094, found 544.2094.

**Synthesis and characterisation of (2*R*,4'*S*)-5-bromo-4'-((*Z*)-4-(4-chlorophenyl)buta-1,3-dien-2-yl)-1'-(4-methoxybenzyl)spiro[indene-2,3'-piperidine]-1,2'(3*H*)-dione **4l****

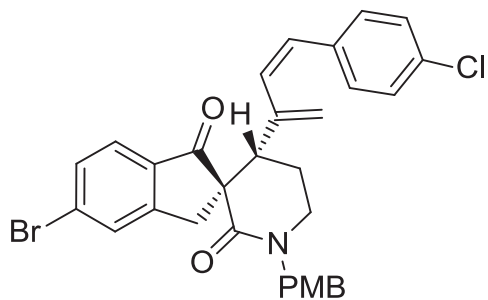

Synthesised from substrate **1k** (88 mg, 0.20 mmol) and (*Z*)-1-chloro-4-(2-iodovinyl)benzene (79 mg, 0.30 mmol) according to the general procedure. Compound **4l** was obtained (single diastereomer, 91 mg, 79%) as a colourless oil after purification by flash column chromatography on silica gel (PE/EtOAc 1:1). Analysis of the <sup>1</sup>H NMR spectrum of the crude reaction mixture showed a 16:1 dr.

The *ee* was determined by HPLC analysis using a Chiralcel AD column, hexane/isopropanol 70:30, 1.0 mL/min,  $\lambda = 230$  nm, major  $t_R = 11.43$  min, minor  $t_R = 16.76$  min (71% *ee*);  $[\alpha]_D^{25} = -18.8$  (*c* 0.90, CH<sub>2</sub>Cl<sub>2</sub>).

<sup>1</sup>H NMR (500 MHz, CDCl<sub>3</sub>)  $\delta_H$  7.58 (d, 1H,  $J = 8.2$  Hz), 7.50 (d, 1H,  $J = 0.8$  Hz), 7.43-7.45 (m, 1H), 7.20 (d, 2H,  $J = 8.6$  Hz), 7.05-7.08 (m, 2H), 6.86-6.92 (m, 4H), 6.06 (d, 1H,  $J = 12.5$  Hz), 5.67 (d, 1H,  $J = 12.5$  Hz), 5.19 (s, 1H), 5.03 (s, 1H), 4.67 (d, 1H,  $J = 14.4$  Hz), 4.33 (d, 1H,  $J = 14.4$  Hz), 3.81 (s, 3H), 3.20-3.42 (m, 5H), 2.08-2.13 (m, 1H), 1.83-1.92 (m, 1H); <sup>13</sup>C NMR (125 MHz, CDCl<sub>3</sub>)  $\delta_C$  204.1, 170.1, 159.1, 155.4, 143.4, 135.7, 134.9, 132.9, 131.2, 130.9, 130.4, 129.8, 129.6 (3C), 129.5 (2C), 128.7, 128.2 (2C), 125.5, 117.7, 114.0 (2C), 60.2, 55.3, 49.8, 45.6, 44.7, 36.0, 24.6; **FT-IR**  $\nu_{\max}$ (NaCl)/ $\text{cm}^{-1}$  2931 (C-H), 1717 (C=O), 1631 (NC=O), 1596 (C=C); **MS** (ESI+)  $m/z$  (rel. intensity %) 598.10, 600.11 (M + Na<sup>+</sup>, 100); **HRMS** (ESI+) calcd. for C<sub>31</sub>H<sub>27</sub>BrClNNaO<sub>3</sub> [M + Na]<sup>+</sup> 598.0755, 600.0735 found 598.0745, 600.0718.

### Synthesis and characterisation of (5*S*,10*S*)-7-benzyl-10-[1-(3,5-dimethylphenyl)vinyl]-2-[(4-methylphenyl)sulfonyl]-2,7-diazaspiro[4.5]decane-1,6-dione **4m**

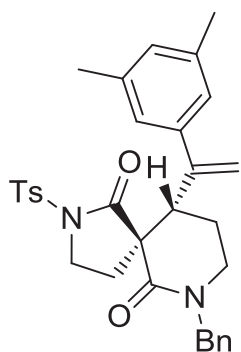

Synthesised from substrate **11** (88 mg, 0.20 mmol) and 1-iodo-3,5-dimethylbenzene (70 mg, 0.30 mmol) according to the general procedure. Compound **4m** was obtained (single diastereomer, 65 mg, 60%) as a colourless oil after purification by flash column chromatography on silica gel (PE/EtOAc 1:2). Analysis of the <sup>1</sup>H NMR spectrum of the crude reaction mixture showed a 33:1 dr.

The *ee* was determined by HPLC analysis using a Chiralcel AD column, hexane/isopropanol 60:40, 1.0 mL/min,  $\lambda = 230$  nm, major  $t_R = 5.72$  min, minor  $t_R = 8.07$  min (83% *ee*);  $[\alpha]_D^{25} = -23.4$  (*c* 1.80, CH<sub>2</sub>Cl<sub>2</sub>).

**<sup>1</sup>H NMR** (400 MHz, CDCl<sub>3</sub>)  $\delta_H$  7.89 (d, 2H, *J* = 8.3 Hz), 7.26-7.31 (m, 5H), 7.07-7.09 (m, 2H), 6.94 (s, 1H), 6.87 (s, 2H), 5.36 (s, 1H), 4.80 (s, 1H), 4.68 (d, 1H, *J* = 14.7 Hz), 4.31 (d, 1H, *J* = 14.8 Hz), 4.05 (q, 1H, *J* = 8.3 Hz), 3.91 (dt, 1H, *J* = 8.9 Hz, *J* = 2.6 Hz), 3.43 (t, 1H, *J* = 4.8 Hz), 3.27-3.34 (m, 1H), 3.17-3.23 (m, 1H), 2.64-2.72 (m, 2H), 2.40 (s, 3H), 2.32 (s, 6H), 2.18 (td, 1H, *J* = 13.3 Hz, *J* = 8.6 Hz), 1.48-1.56 (m, 1H); **<sup>13</sup>C NMR** (100 MHz, CDCl<sub>3</sub>)  $\delta_C$  172.9, 168.5, 147.3, 144.9, 141.0, 138.1 (2C), 136.4, 134.6, 129.8, 129.5 (2C), 128.6 (2C), 128.1 (2C), 127.7 (2C), 127.4, 124.5 (2C), 114.6, 55.8, 50.5, 45.8, 44.2, 44.1, 28.5, 22.6, 21.7, 21.3 (2C); **FT-IR**  $\nu_{\max}$ (NaCl)/cm<sup>-1</sup> 2950 (C-H), 1720 (NC=O), 1638 (NC=O), 1359 (SO<sub>2</sub>), 1112 (SO<sub>2</sub>); **MS** (ESI+) *m/z* (rel. intensity %) 565.24 (M + Na<sup>+</sup>, 100); **HRMS** (ESI+) calcd. for C<sub>32</sub>H<sub>34</sub>N<sub>2</sub>NaO<sub>4</sub>S [M + Na]<sup>+</sup> 565.2137, found 565.2138.



## 6. Synthesis of diastereomer 4b'

### Synthesis and characterisation of *rac*-(2*R*,4'*R*)-1'-benzyl-4'-[1-(3,5-dimethylphenyl)vinyl]-6-methoxy-2'*H*-spiro[indene-2,3'-piperidine]-1,2'(3*H*)-dione 4b'

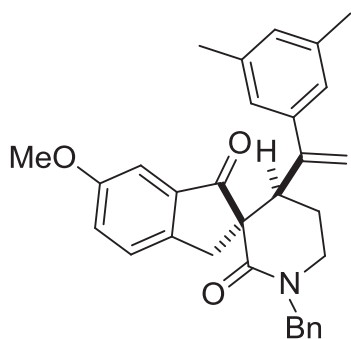

To a solution of **1c** (42 mg, 0.160 mmol) in dioxane (0.30 mL) was added LiHMDS (1.0 M in cyclohexanes, 0.14 mL, 0.140 mmol) at room temperature. After 20 minutes a solution of 1-iodo-3,5-dimethylbenzene (40 mg, 0.170 mmol) and Pd(dppf)Cl<sub>2</sub> (10 mg, 0.012 mmol) in 1,4-dioxane (0.30 mL) was added and the reaction mixture was stirred at 90 °C for 16 h. The reaction mixture was cooled to room temperature and concentrated. The crude residue (dr 3:1 **4b**:**4b'**) was purified by flash column chromatography on silica gel (PE/EtOAc 4:1 to 1:1) to afford **4b'**

(10 mg, 19%) as a yellow oil.  $[\alpha]_D^{25} = -8.0$  (*c* 0.30, CHCl<sub>3</sub>); **<sup>1</sup>H NMR** (500 MHz, CDCl<sub>3</sub>)  $\delta_H$  7.34-7.41 (m, 4H), 7.27-7.33 (m, 1H), 7.08-7.13 (m, 2H), 6.90-6.95 (m, 1H), 6.85 (s, 1H), 6.34 (br s, 2H), 4.92-5.03 (m, 3H), 4.38 (d, 1H, *J* = 14.8 Hz), 3.86 (s, 3H), 3.71 (d, 1H, *J* = 16.7 Hz), 3.47-3.54 (m, 2H), 3.32 (dd, 1H, *J* = 13.4 Hz, *J* = 2.4 Hz), 3.07-3.20 (m, 1H, *J* = 11.2 Hz, *J* = 6.8 Hz), 2.56 (d, 1H, *J* = 16.7 Hz), 2.19 (s, 6H), 1.81-1.89 (m, 1H); **<sup>13</sup>C NMR** (125 MHz, CDCl<sub>3</sub>)  $\delta_C$  204.7, 169.4, 159.3, 148.6, 148.1, 143.5, 137.4, 137.1 (2C), 136.9, 129.0, 128.7 (2C), 127.9 (2C), 127.3, 126.7, 124.4 (2C), 124.0 (2C), 116.4, 104.9, 61.7, 55.6, 50.8, 46.8 (2C), 38.0, 24.7, 21.2; **FT-IR**  $\nu_{\max}$ (NaCl)/cm<sup>-1</sup> 2956 (C-H), 1713 (C=O), 1628 (NC=O); **MS** (ESI+) *m/z* (rel. intensity %) 466.30 (M + H<sup>+</sup>, 90), 488.29 (M + Na<sup>+</sup>, 100); **HRMS** (ESI+) calcd. for C<sub>31</sub>H<sub>31</sub>NNaO<sub>3</sub> [M + Na]<sup>+</sup> 488.2196, found 488.2183.

## 7. References

- [1] M. Korner, M. Hiersemann, *Org. Lett.* **2007**, *9*, 4979.
- [2] N. A. Petasis, I. A. Zavialov, *Tetrahedron Lett.* **1996**, *37*, 567.
- [3] L. L. W. Cheung, A. K. Yudin, *Org. Lett.* **2009**, *11*, 1281.
- [4] Y. Hirai, T. Terada, T. Yamazaki, T. Momose, *J. Chem. Soc., Perkin Trans 1*, **1992**, 509.
- [5] M. Li, D. J. Dixon, *Org. Lett.* **2010**, *12*, 3784.
- [6] S. E. Denmark, N. Nakajima, O. J.-C. Nicaise, A.-M. Faucher, J. P. Edwards, *J. Org. Chem.* **1995**, *60*, 4884.

$^1\text{H}$  NMR spectrum of **1a**

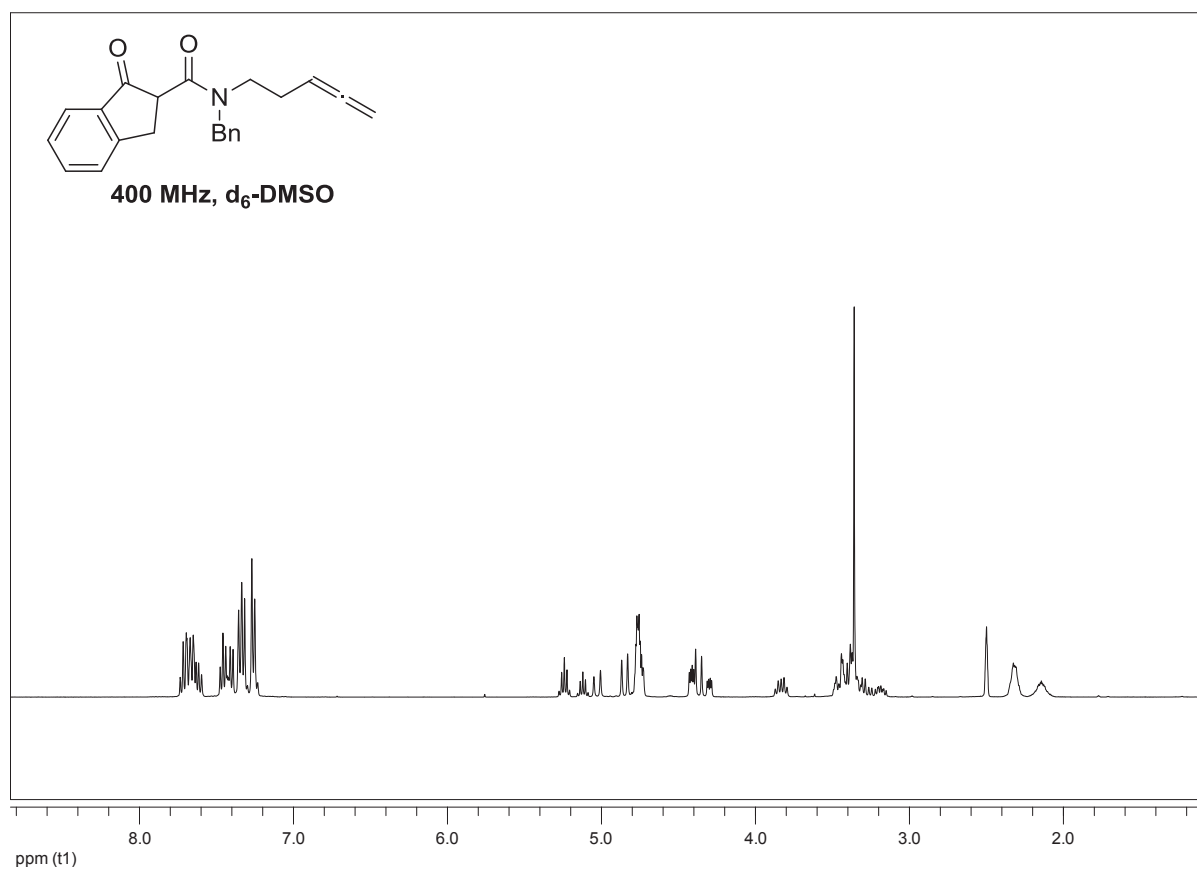

$^{13}\text{C}$  NMR spectrum of **1a**

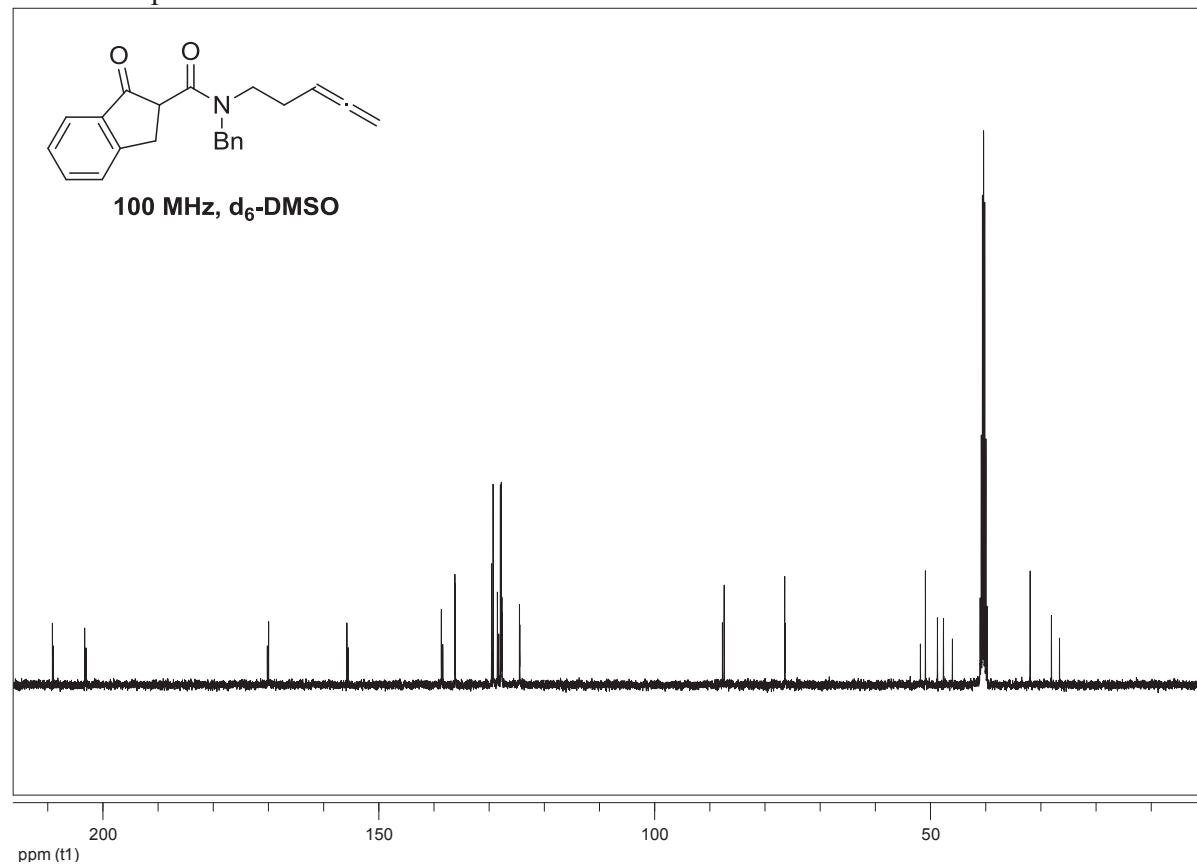

$^1\text{H}$  NMR spectrum of **1b**

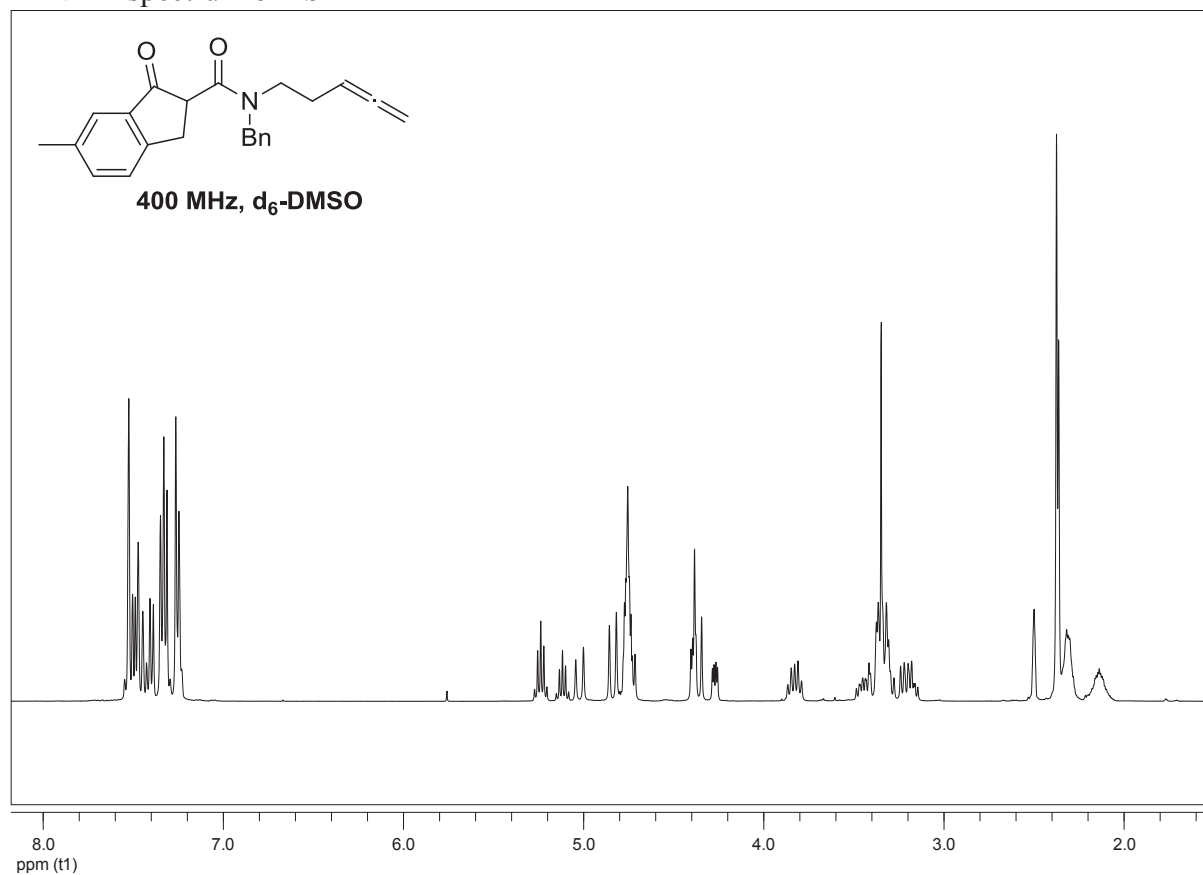

$^{13}\text{C}$  NMR spectrum of **1b**

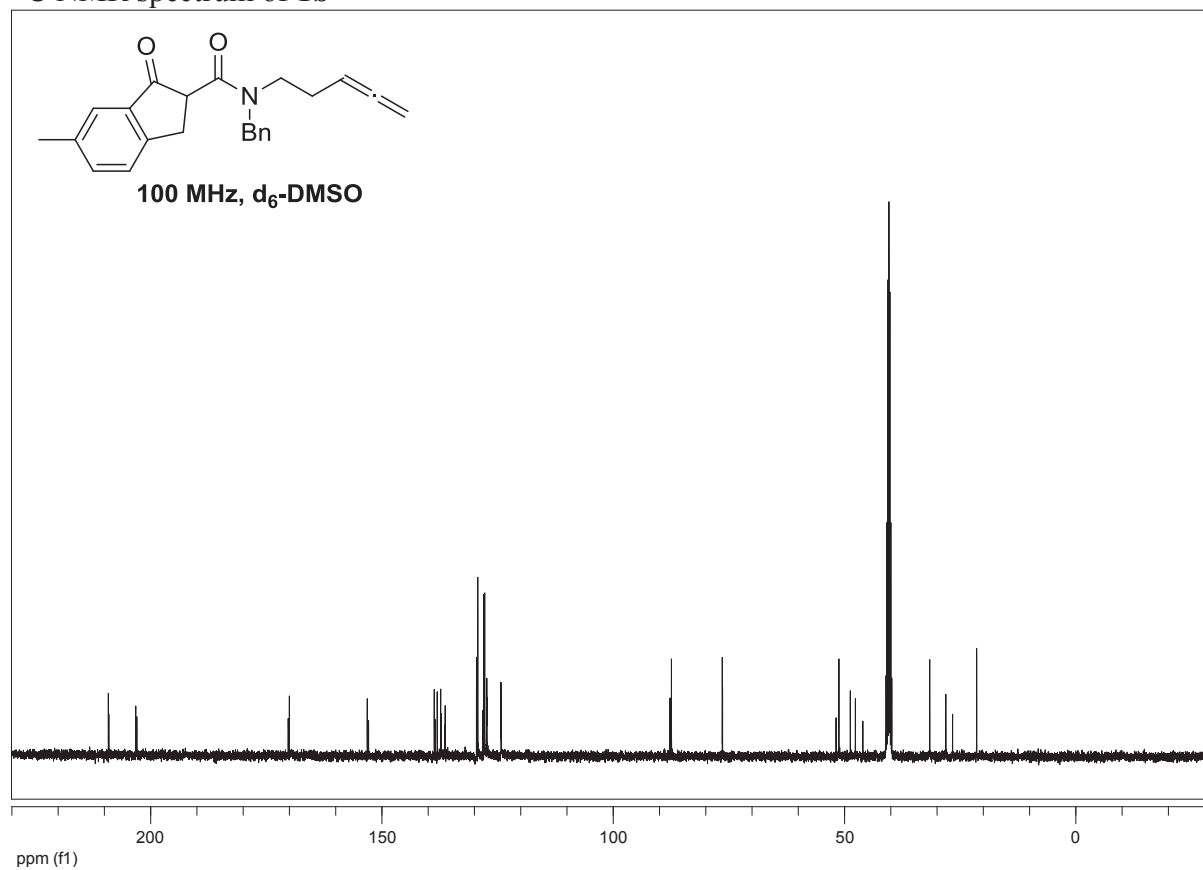

$^1\text{H}$  NMR spectrum of **1c**

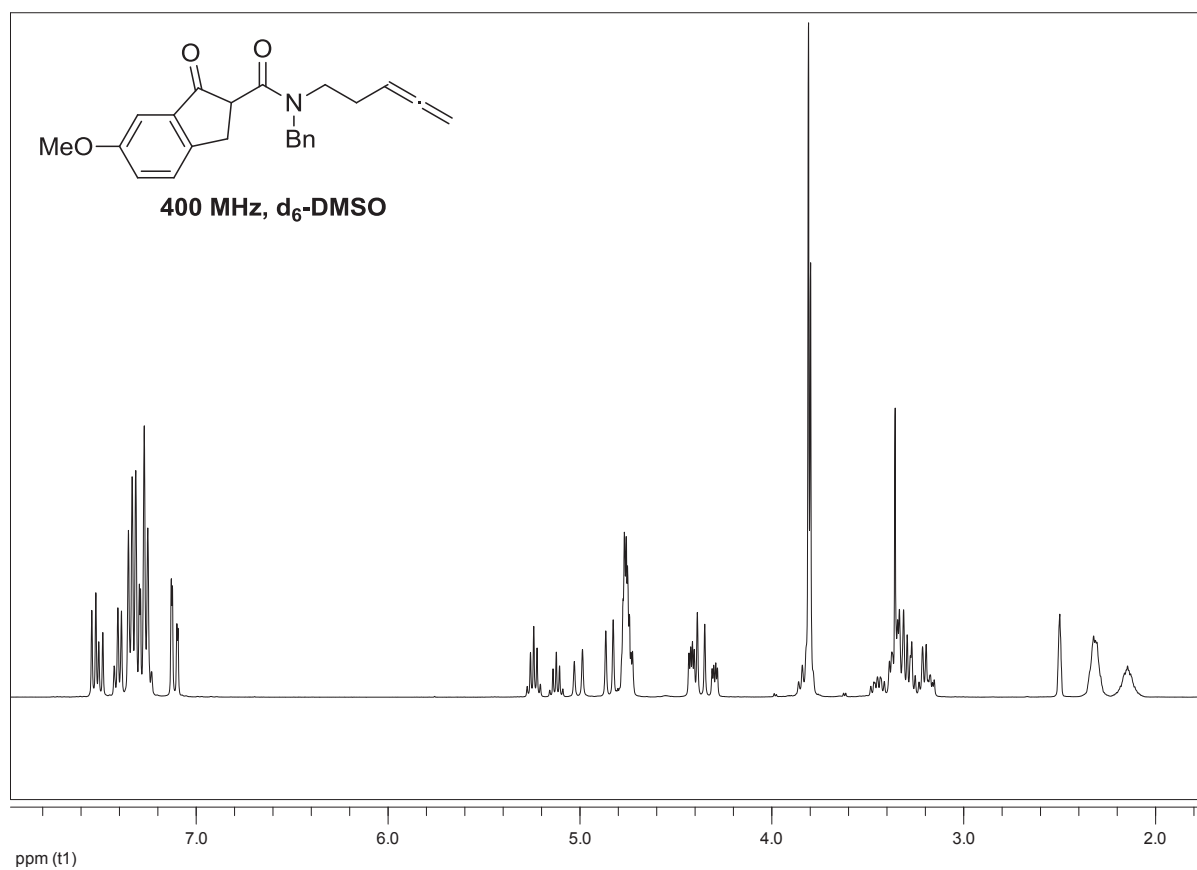

$^{13}\text{C}$  NMR spectrum of **1c**

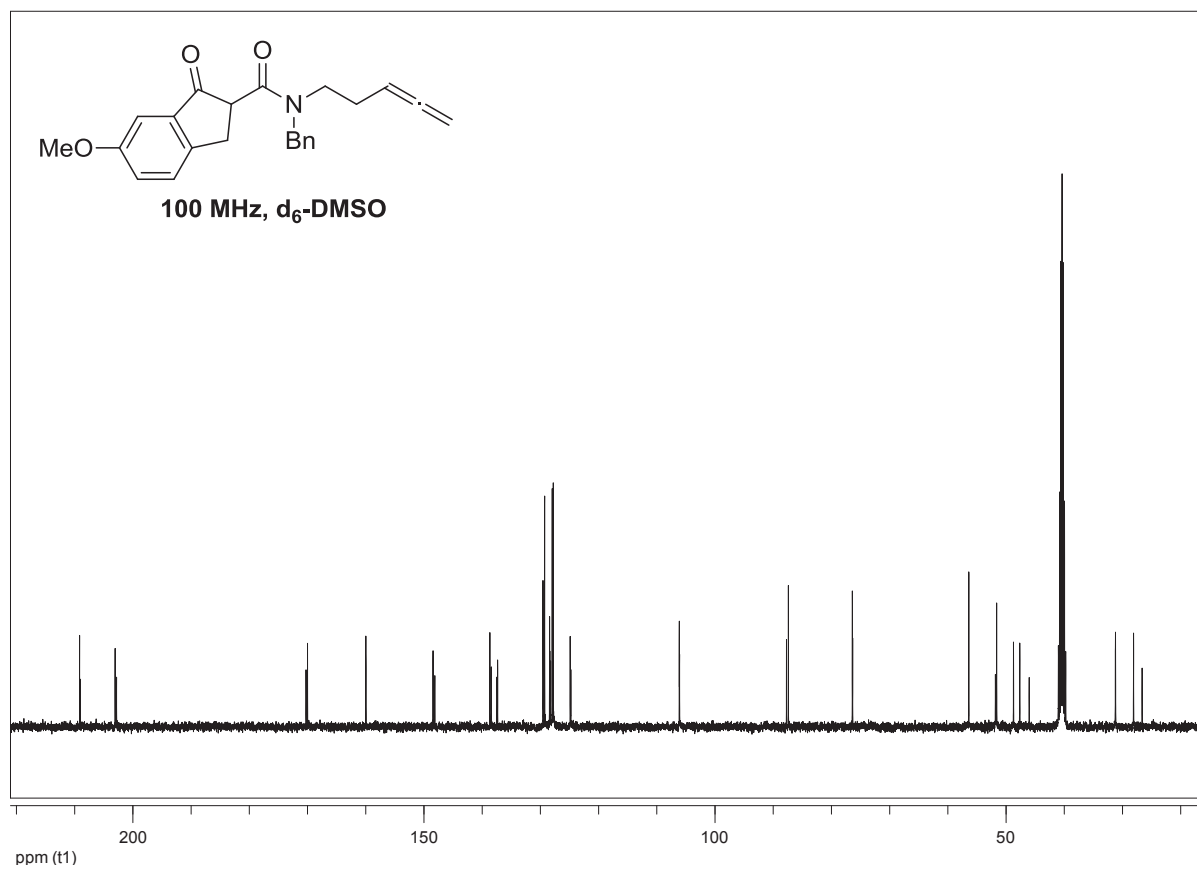

$^1\text{H}$  NMR spectrum of **1d**

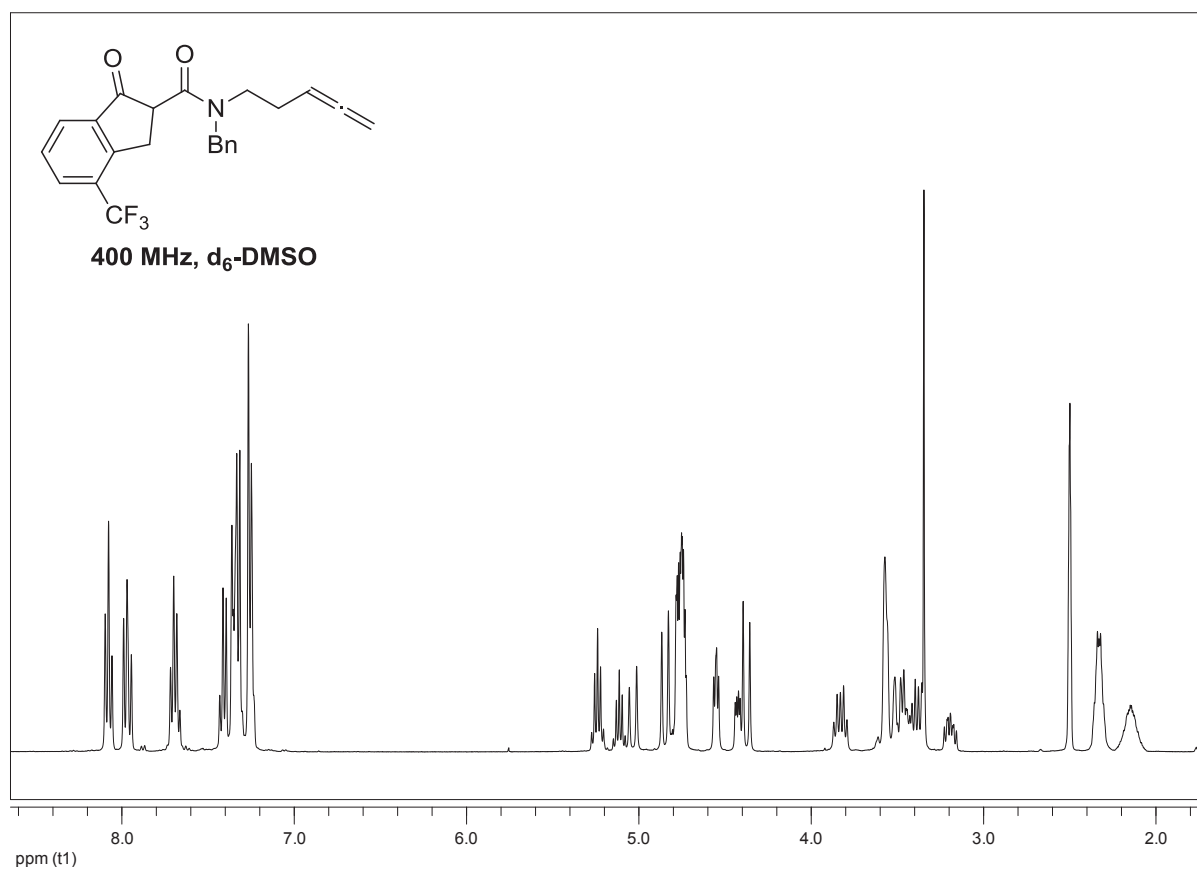

$^{13}\text{C}$  NMR spectrum of **1d**

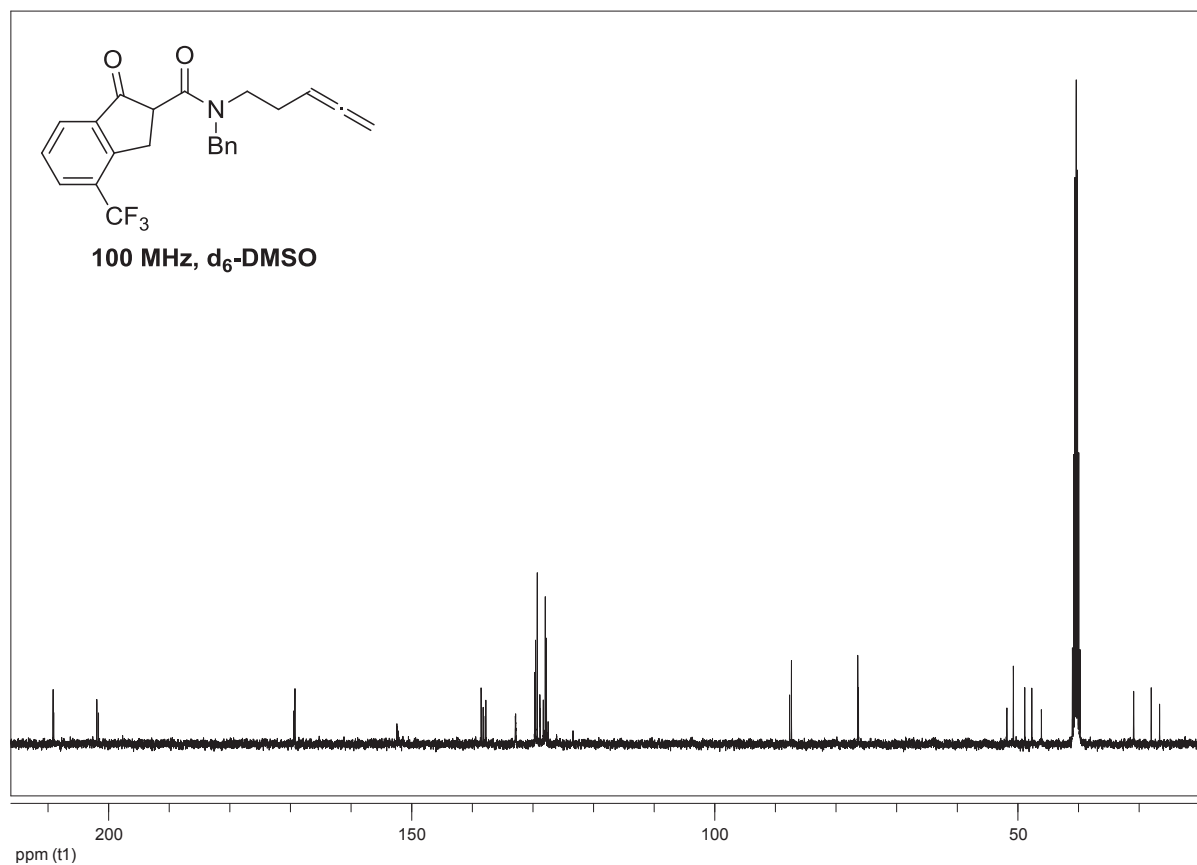

$^1\text{H}$  NMR spectrum of **1e**

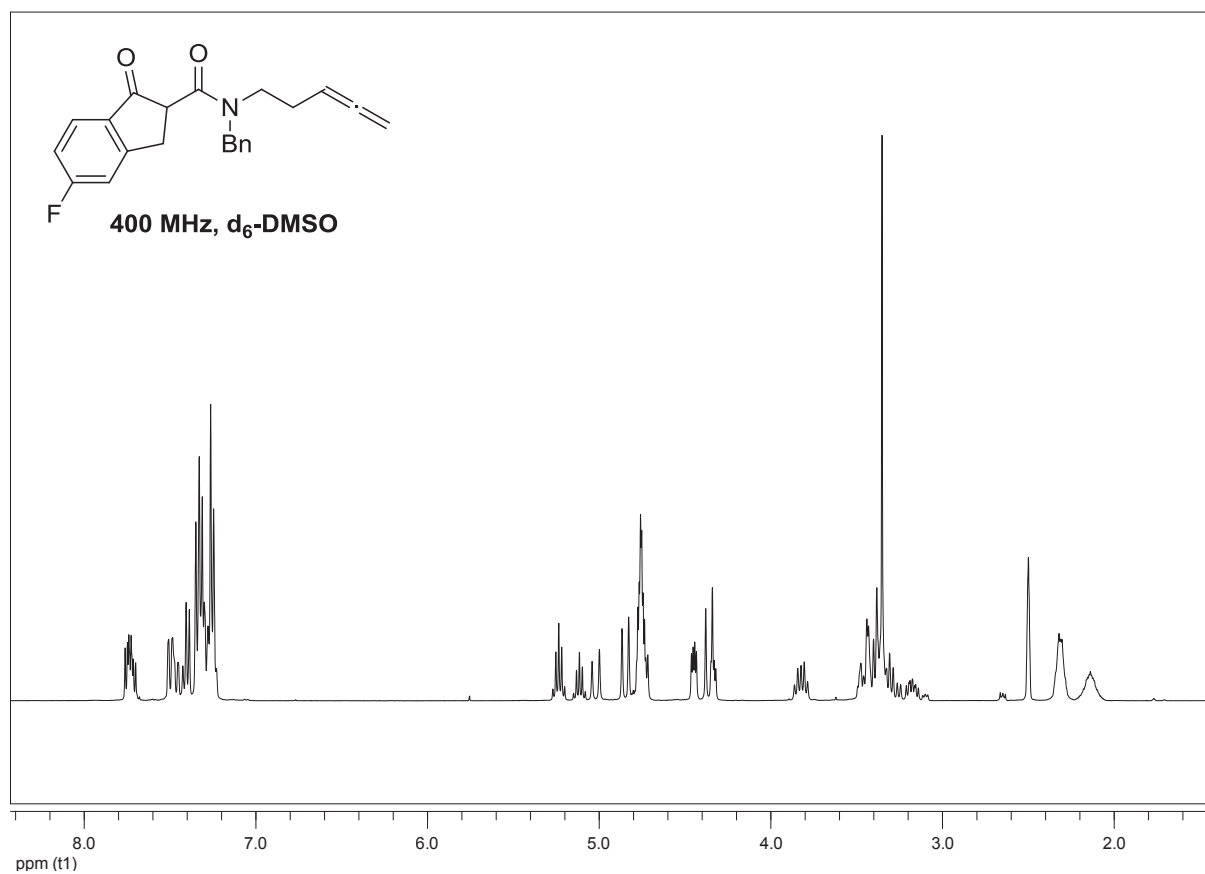

$^{13}\text{C}$  NMR spectrum of **1e**

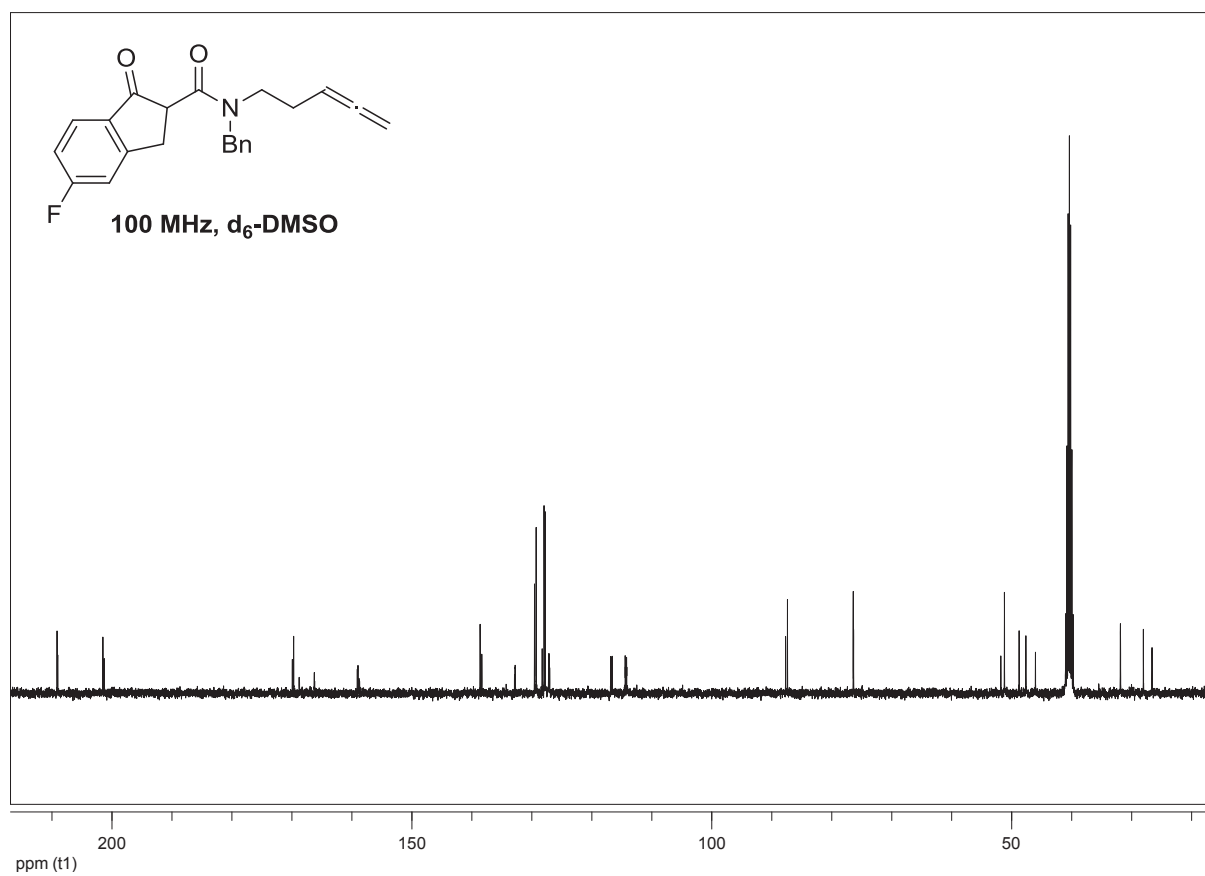

$^1\text{H}$  NMR spectrum of **1f**

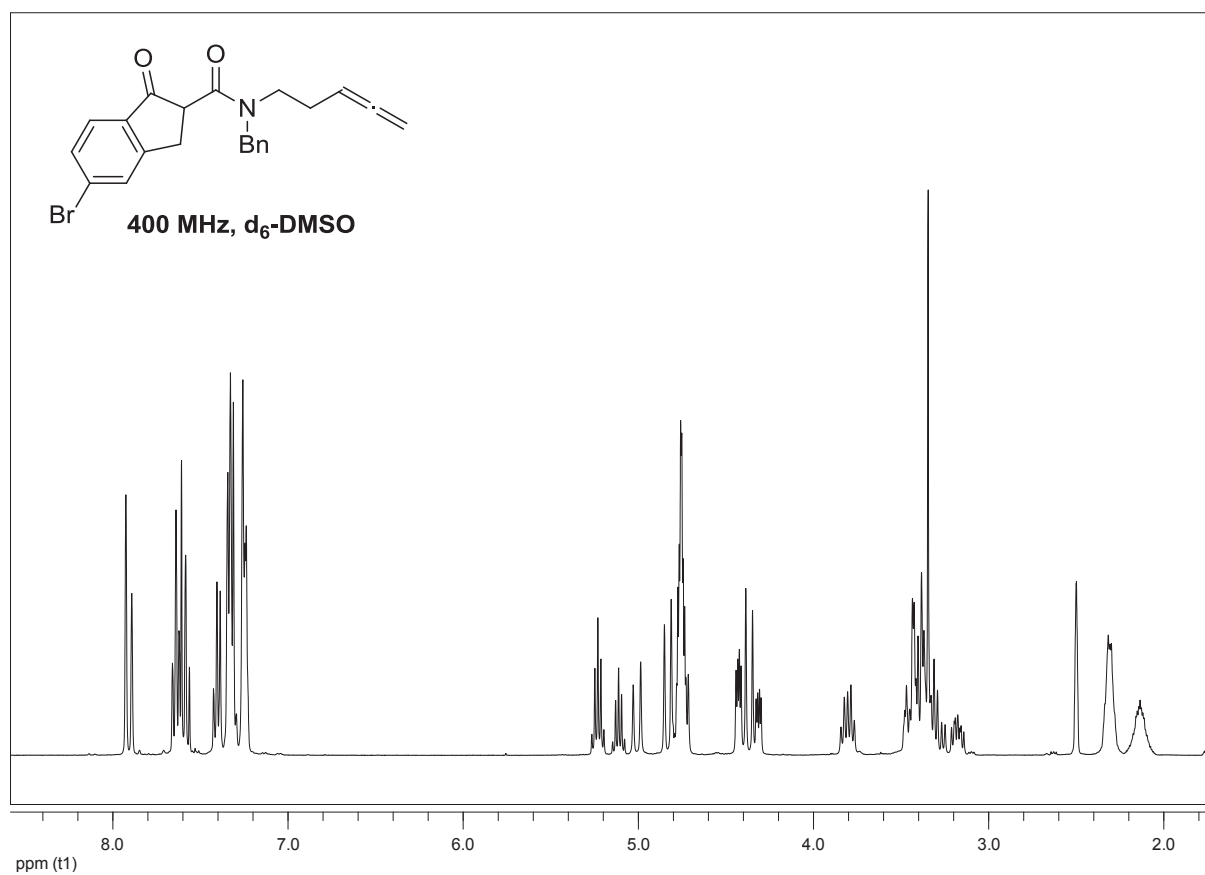

$^{13}\text{C}$  NMR spectrum **1f**

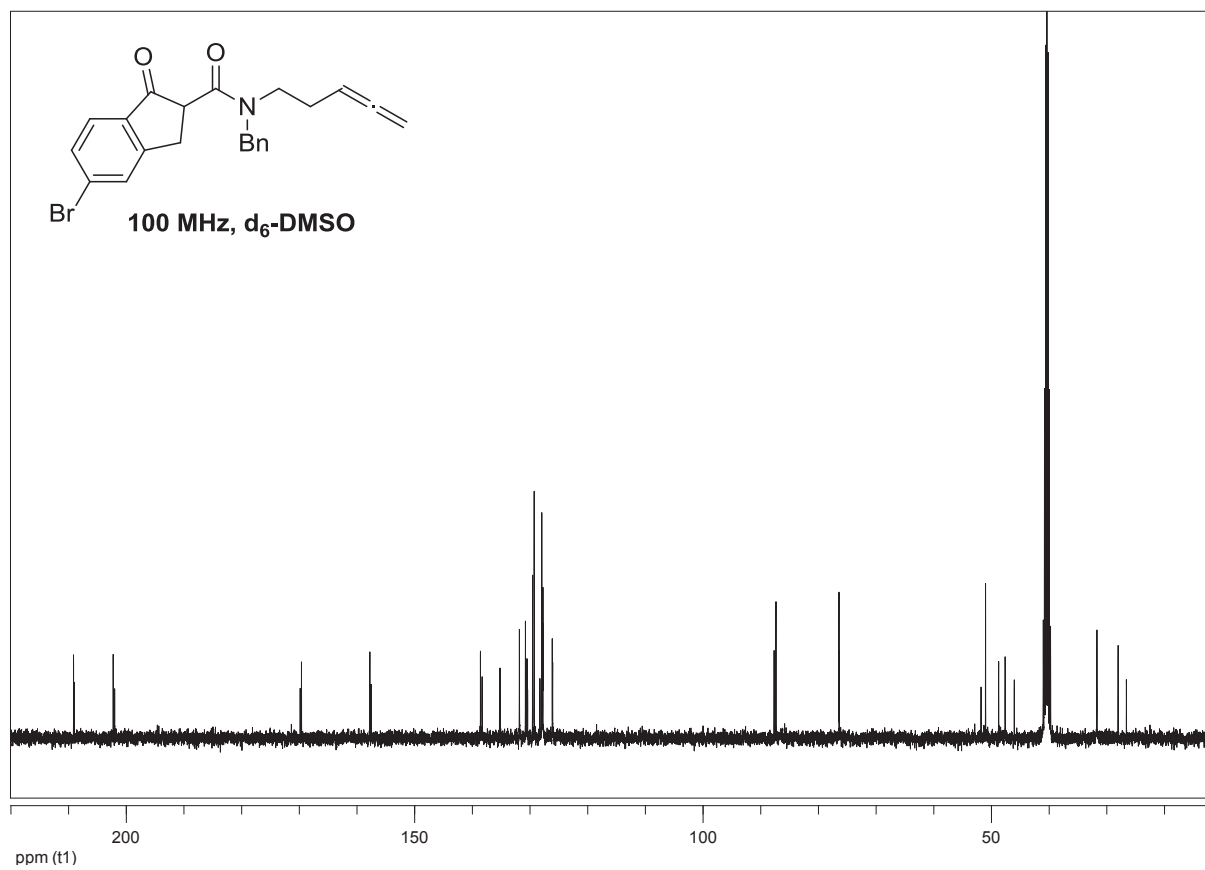



$^1\text{H}$  NMR spectrum of **1g**

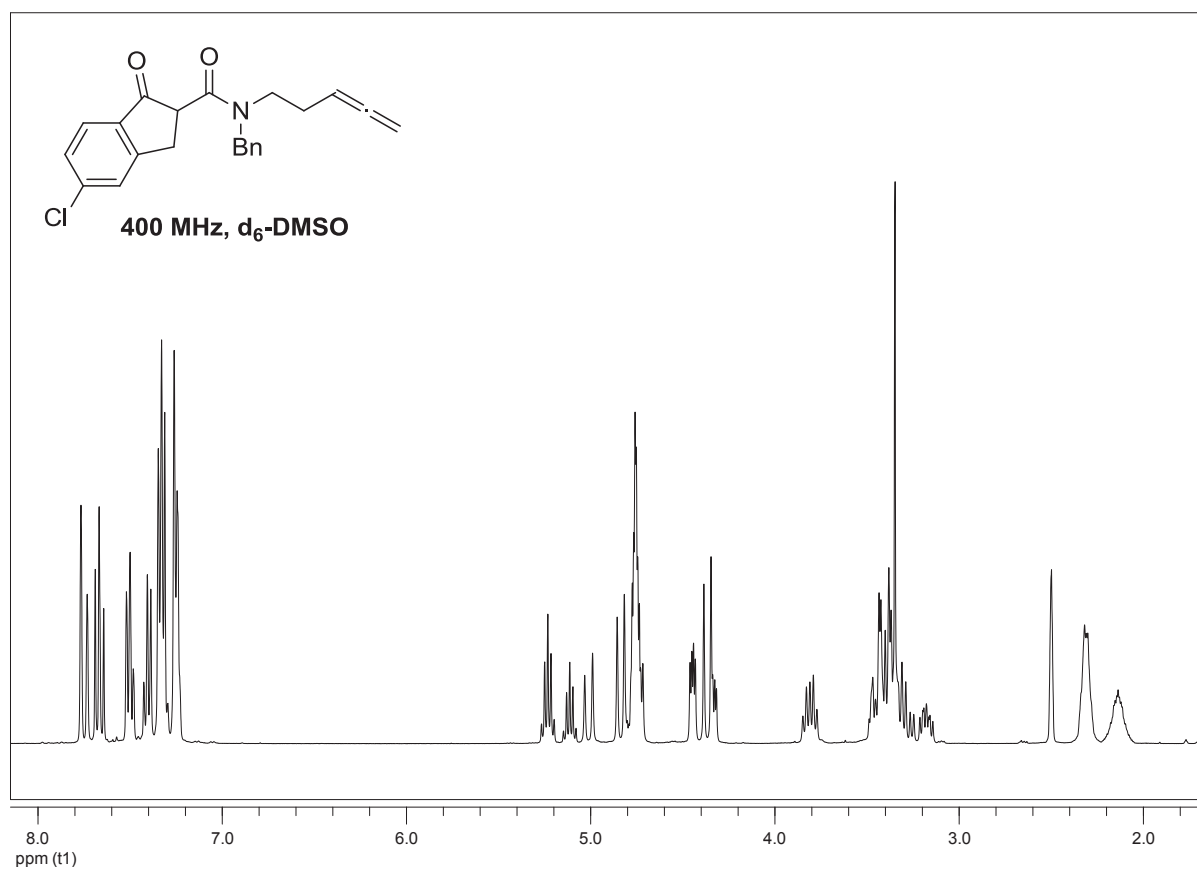

$^{13}\text{C}$  NMR spectrum of **1g**

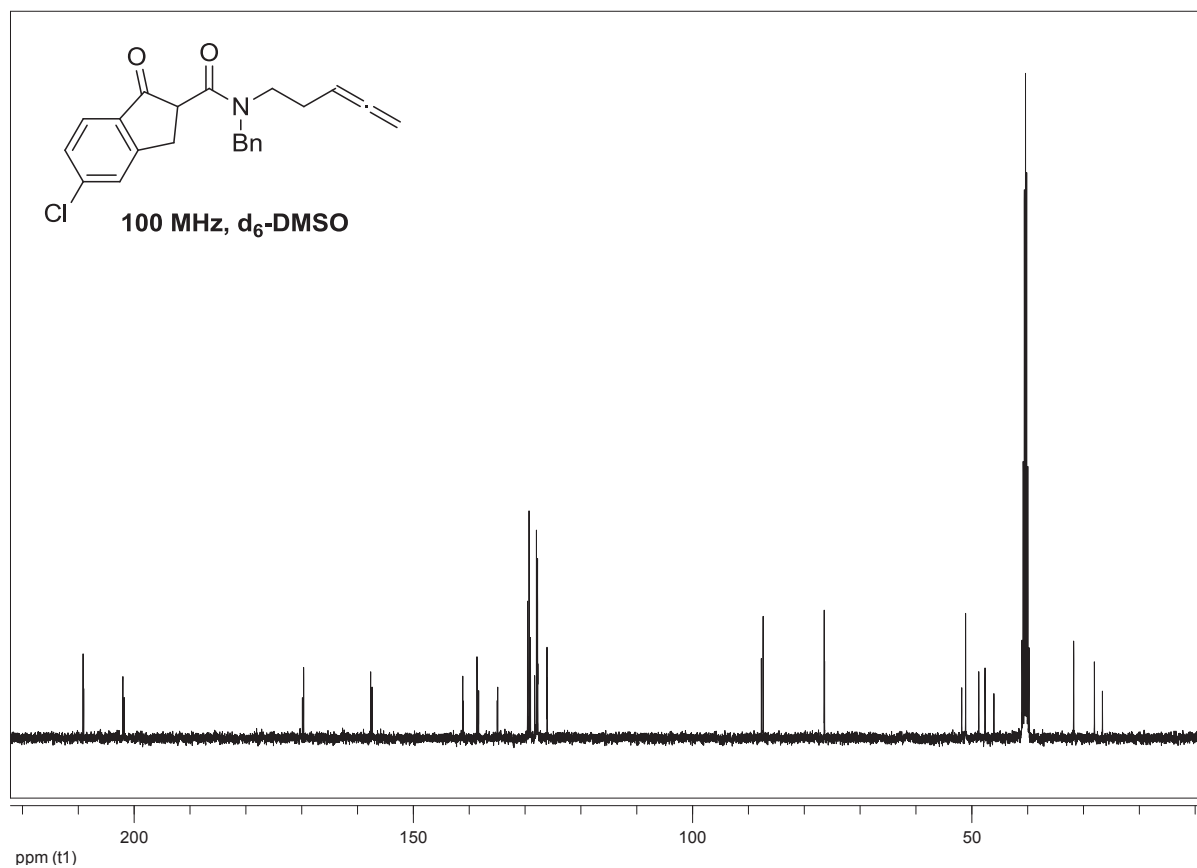

$^1\text{H}$  NMR spectrum of **1h**

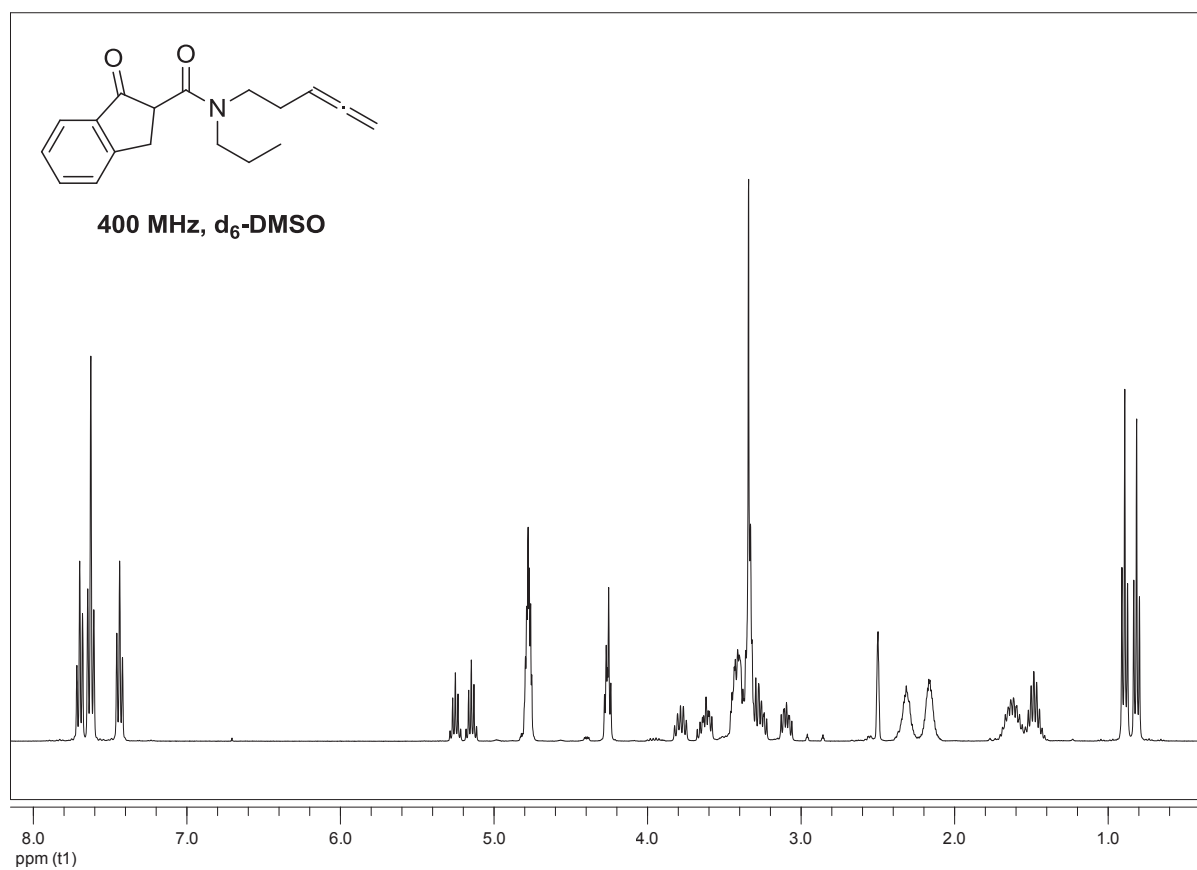

$^{13}\text{C}$  NMR spectrum of **1h**

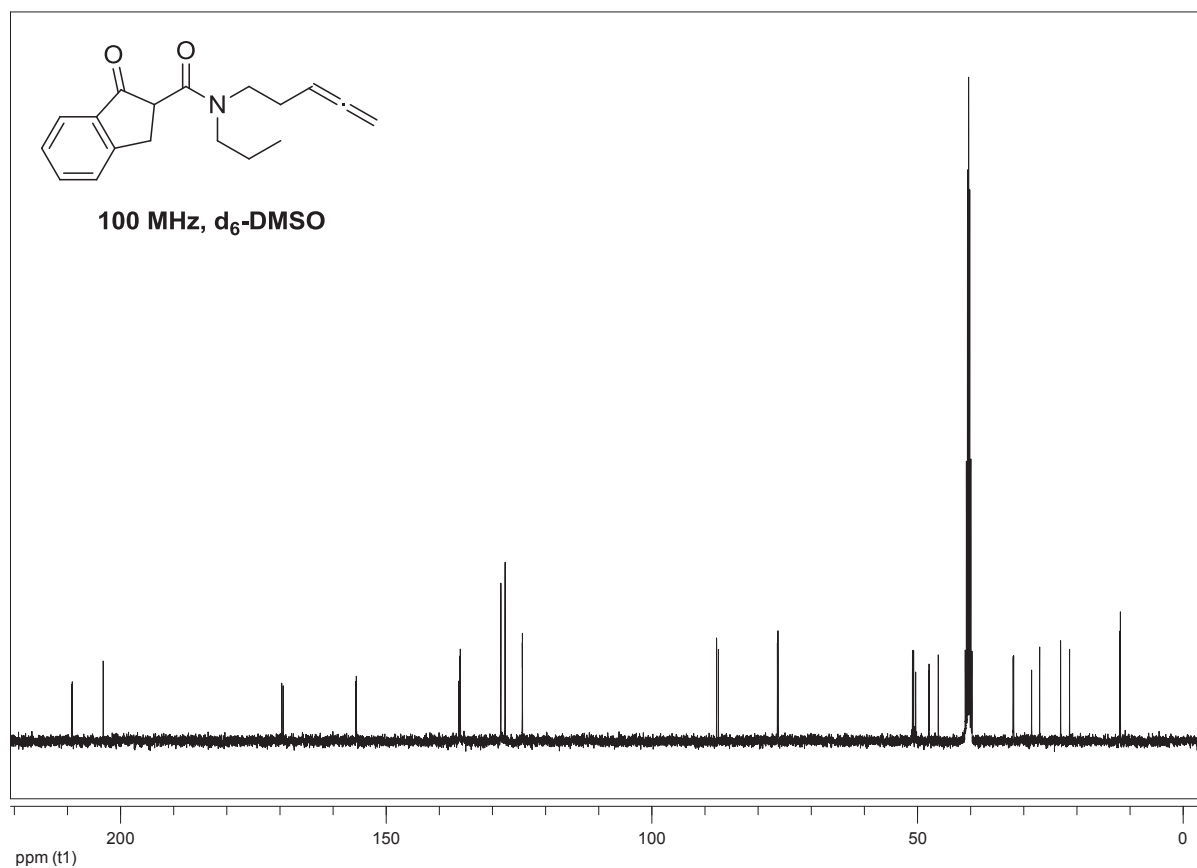

$^1\text{H}$  NMR spectrum of **1i**

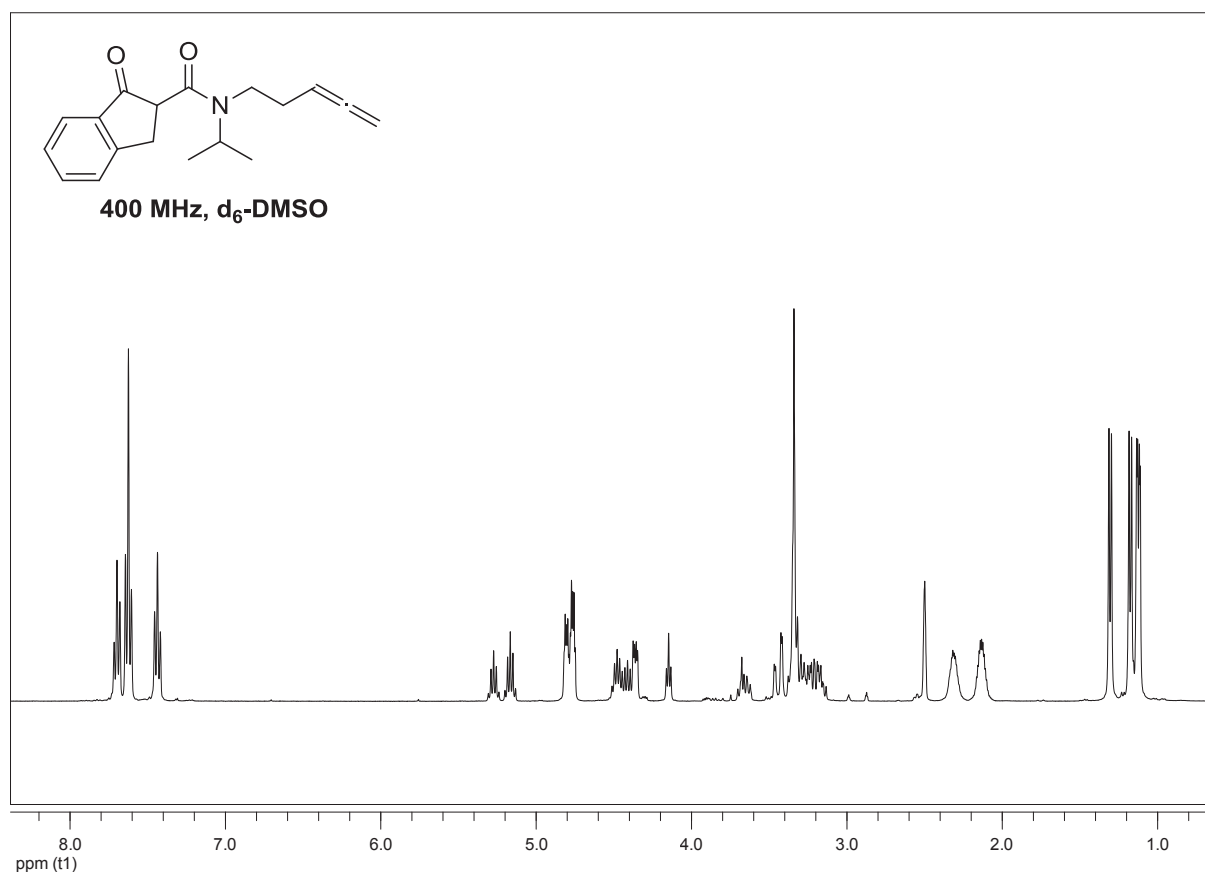

$^{13}\text{C}$  NMR spectrum of **1i**

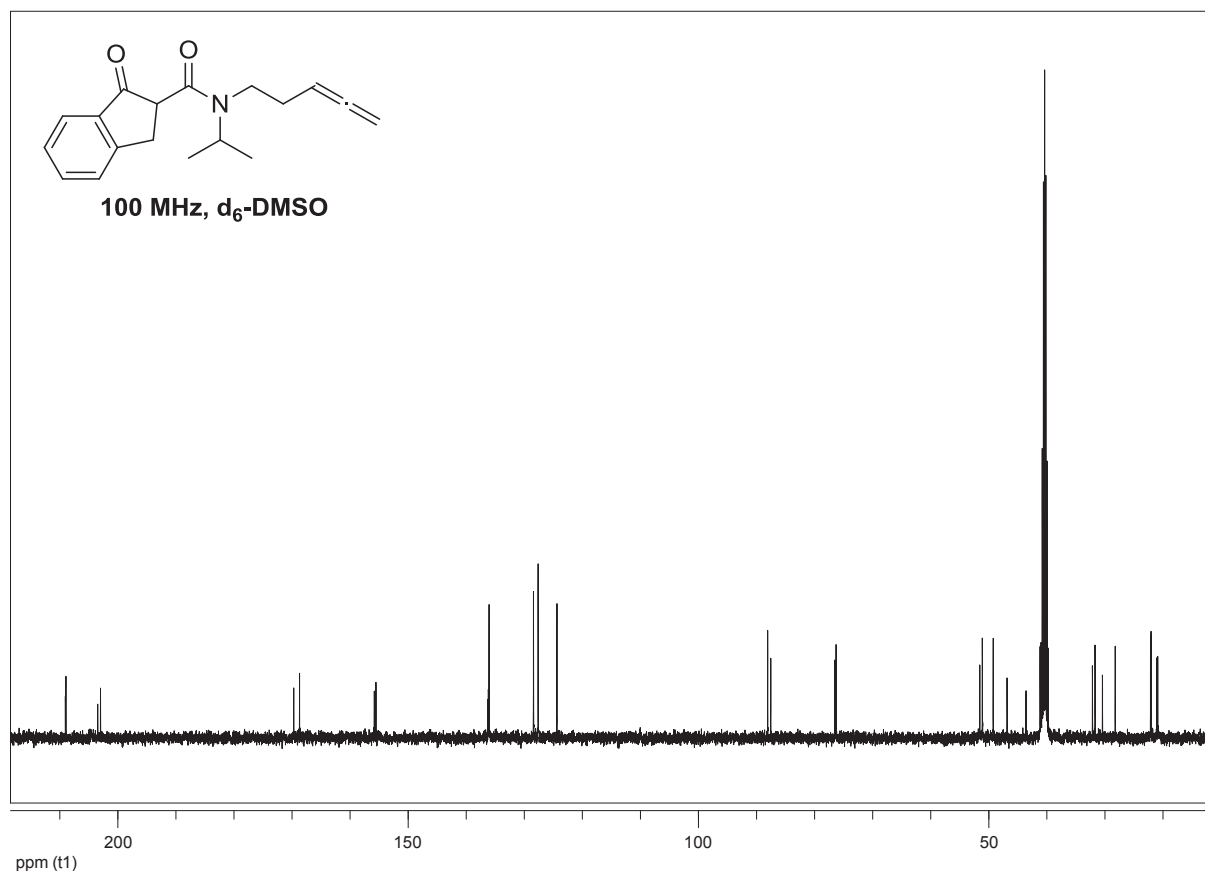

$^1\text{H}$  NMR spectrum of **1j**

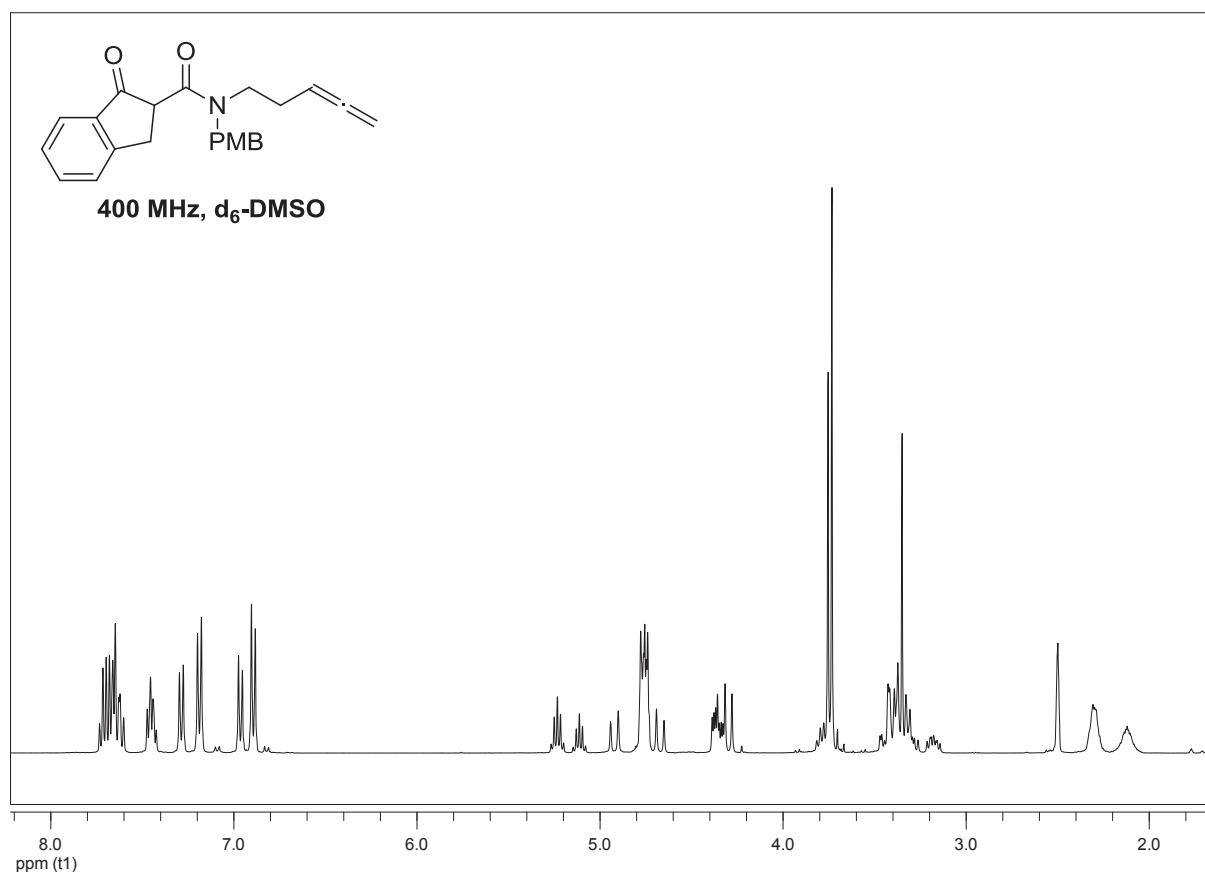

$^{13}\text{C}$  NMR spectrum of **1j**

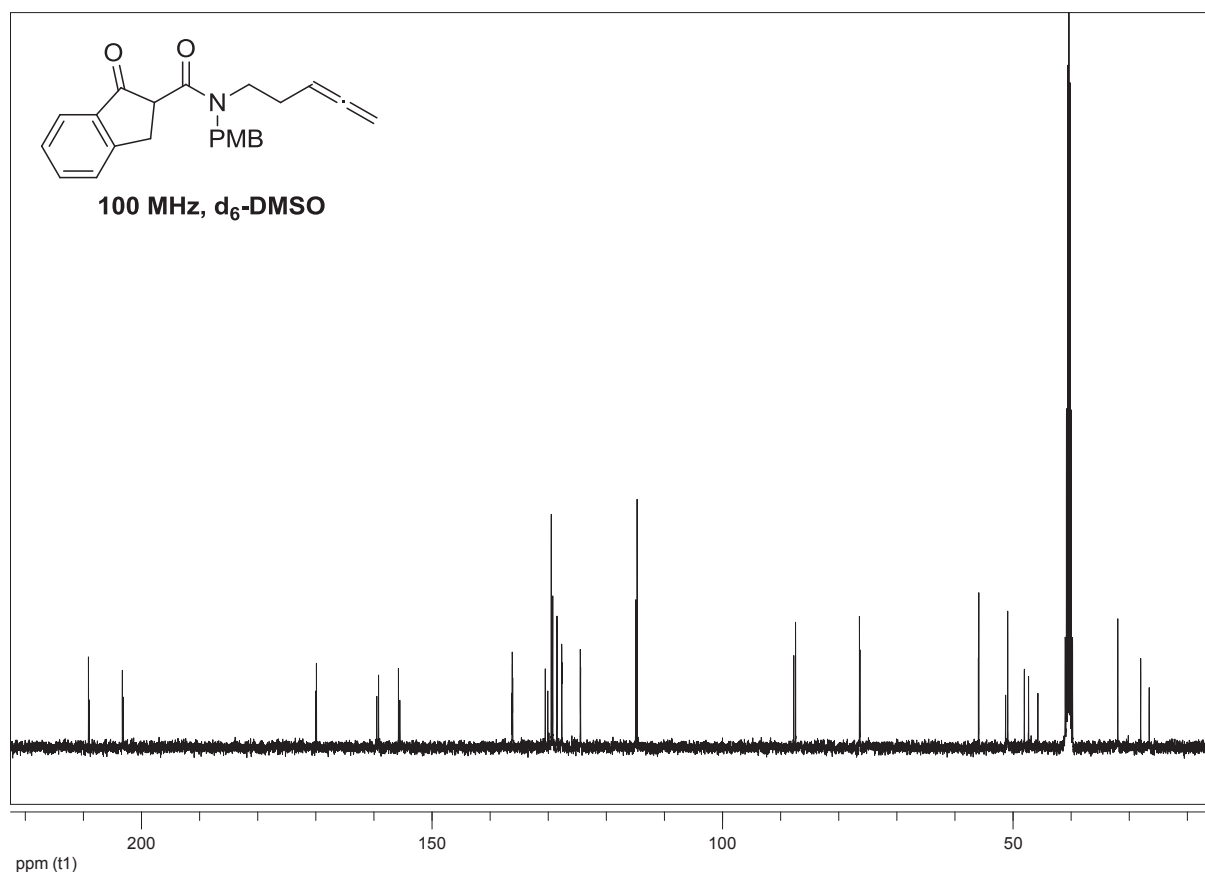

$^1\text{H}$  NMR spectrum of **1k**

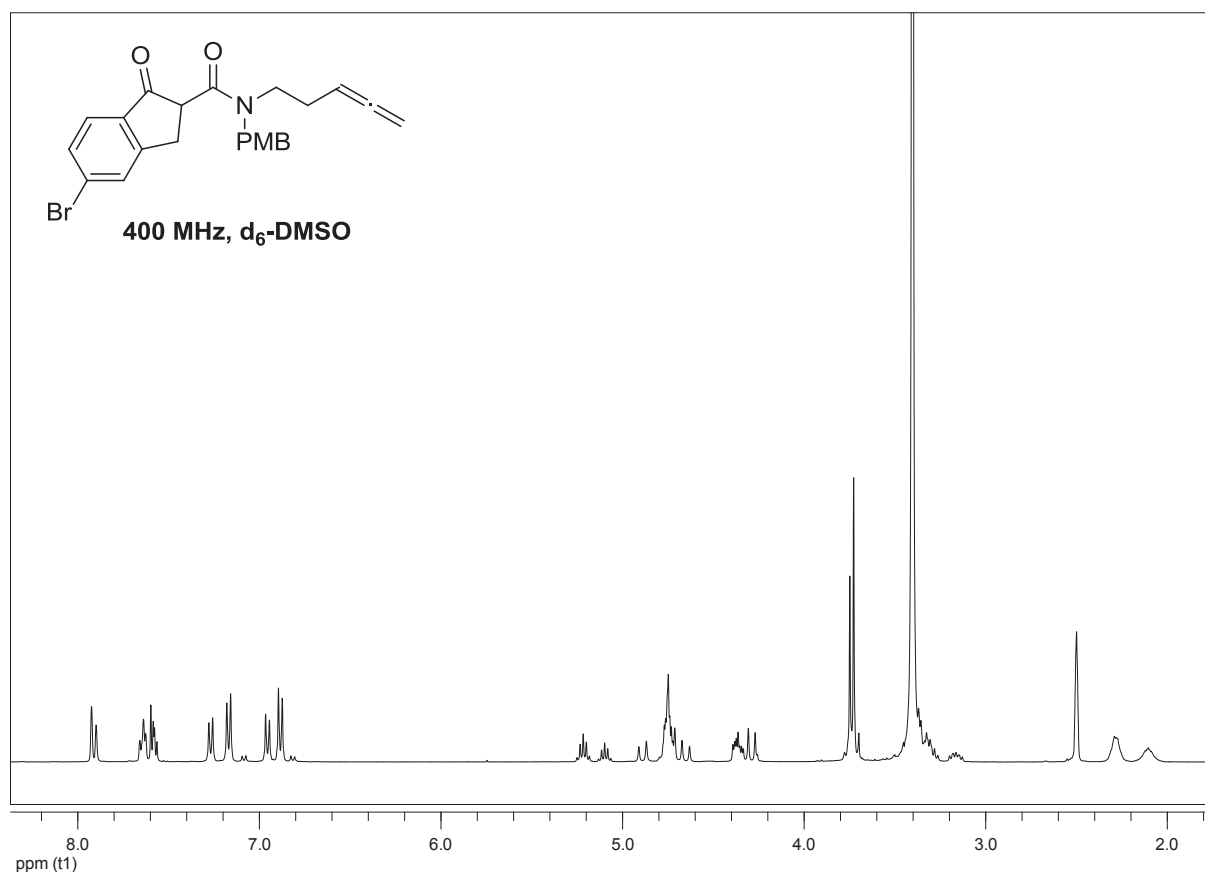

$^{13}\text{C}$  NMR spectrum of **1k**

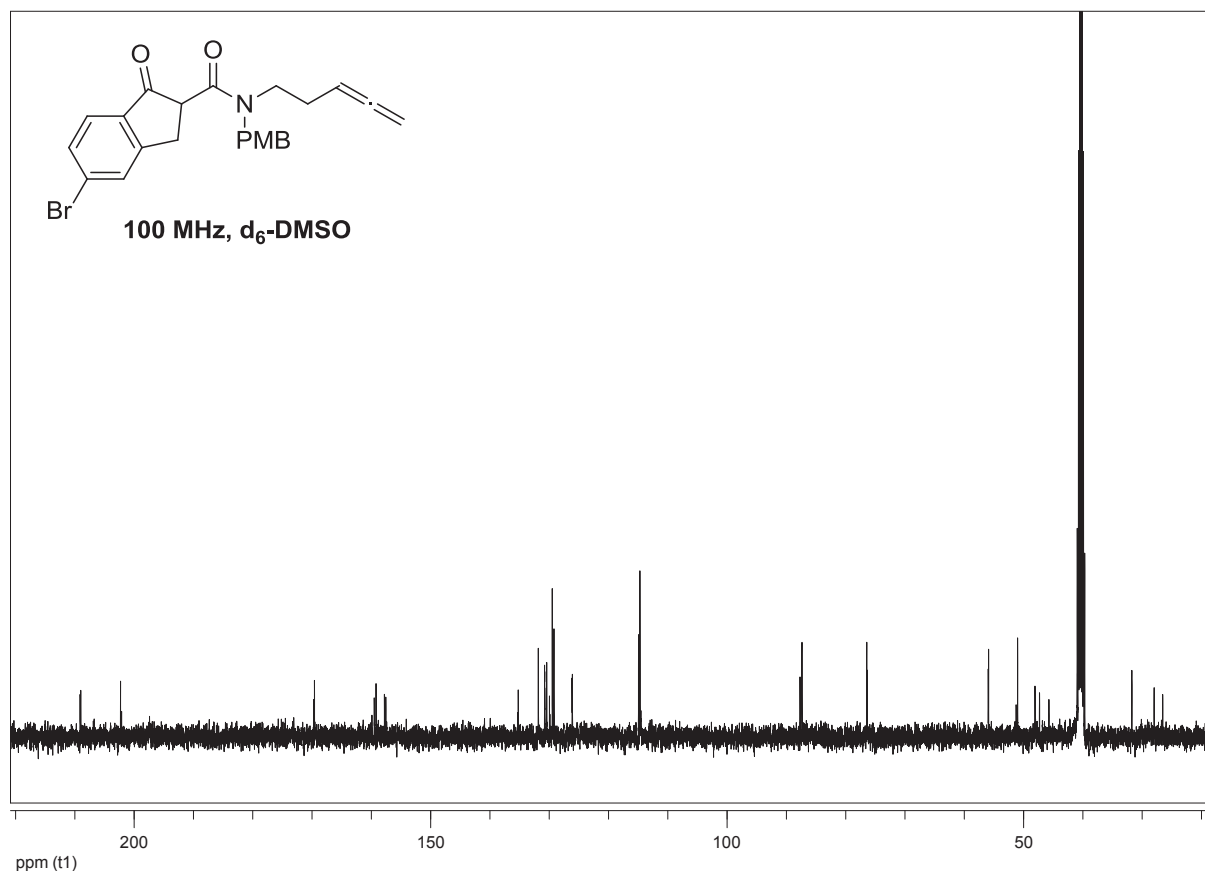

$^1\text{H}$  NMR spectrum of **3i**

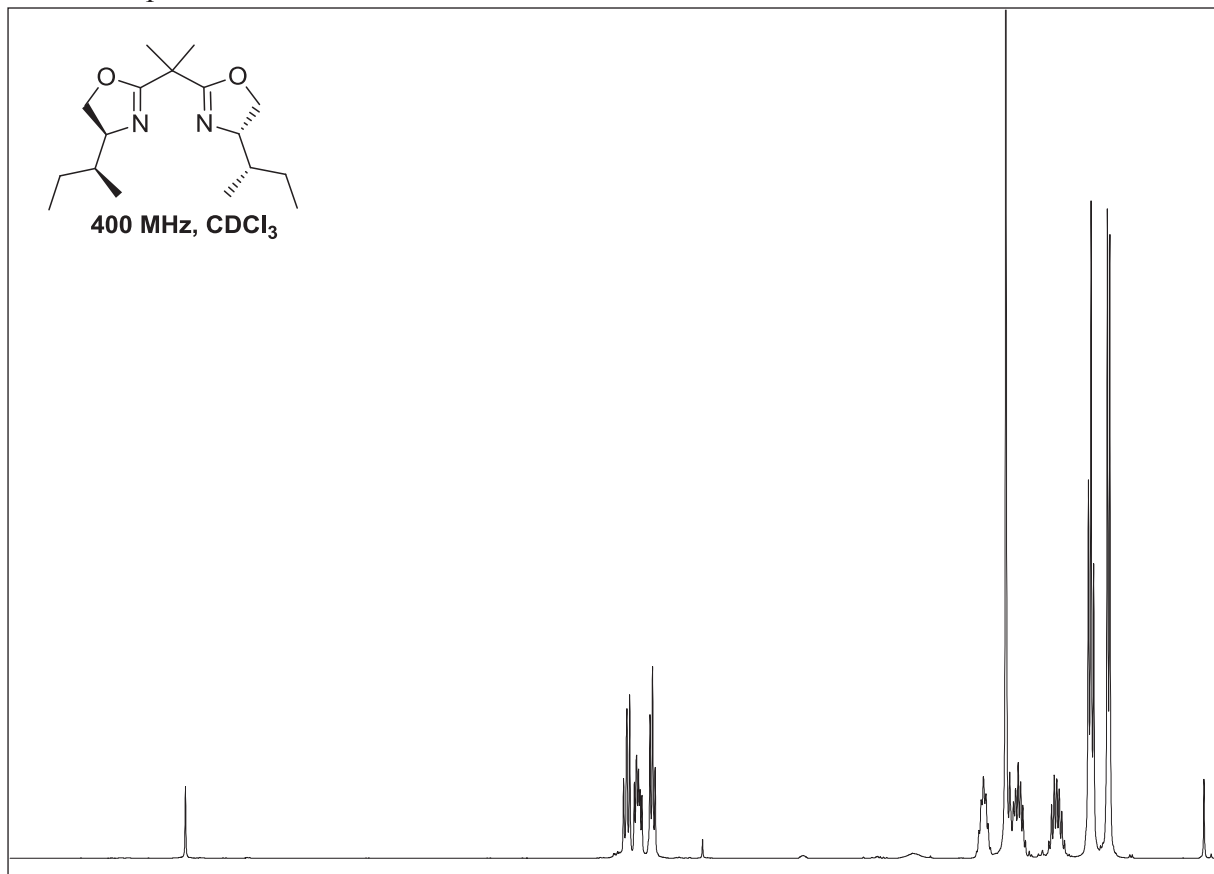

$^{13}\text{C}$  NMR spectrum of **3i**

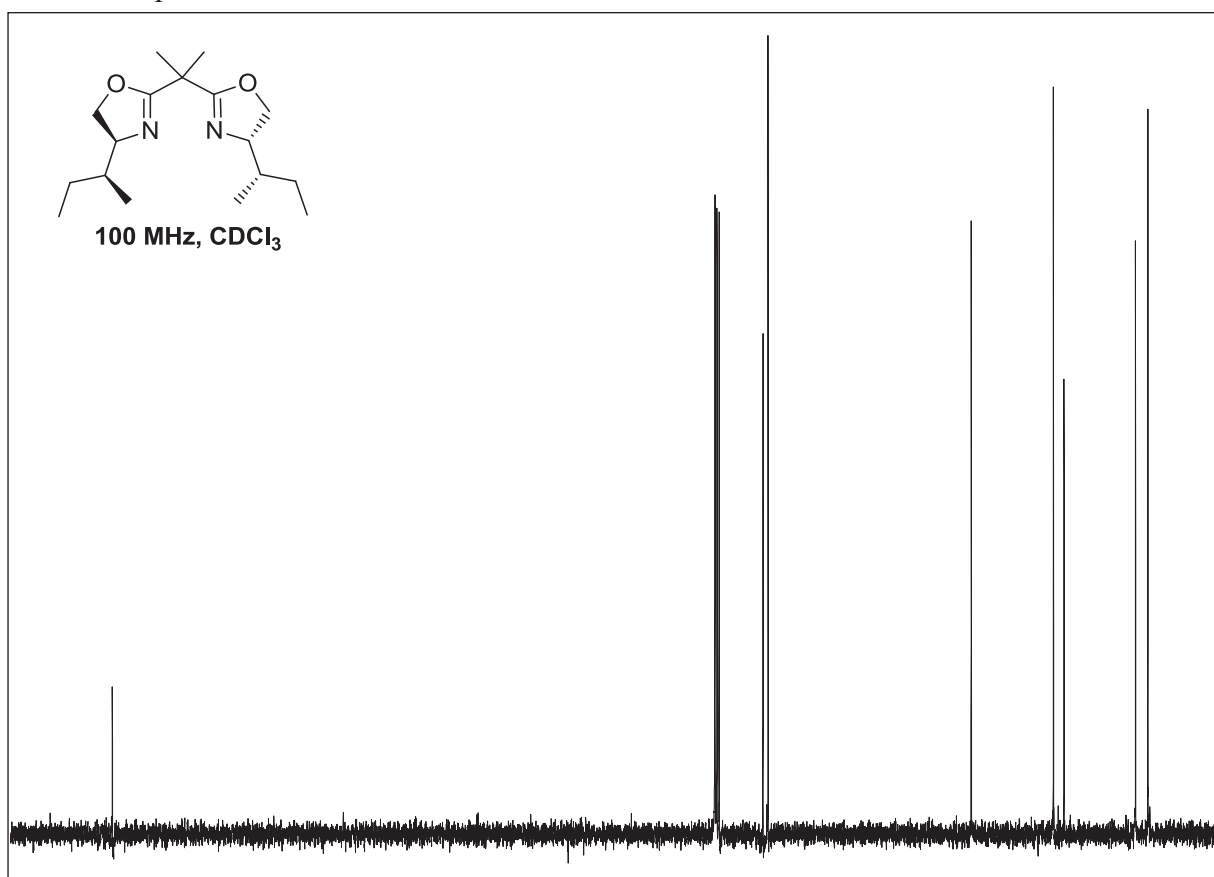

$^1\text{H}$  NMR spectrum of **2a**

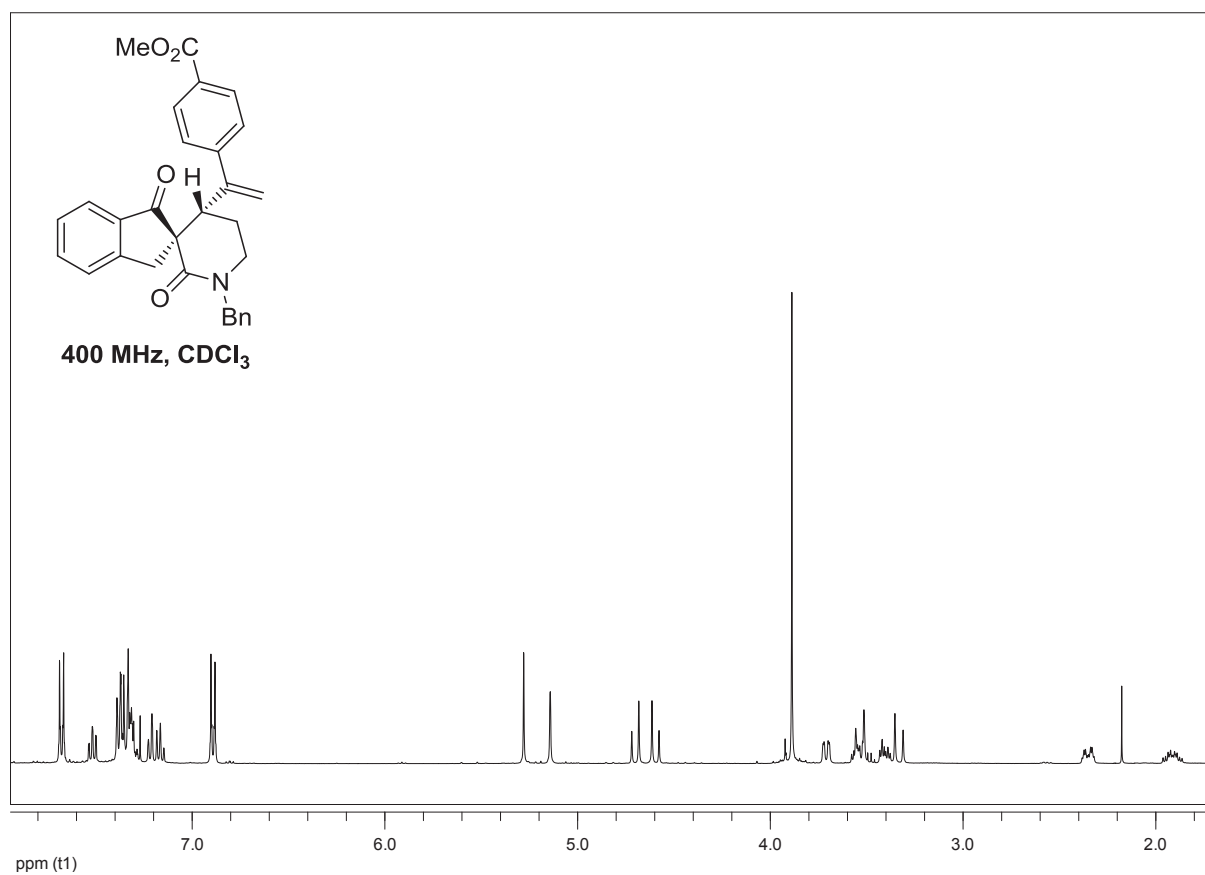

$^{13}\text{C}$  NMR spectrum of **2a**

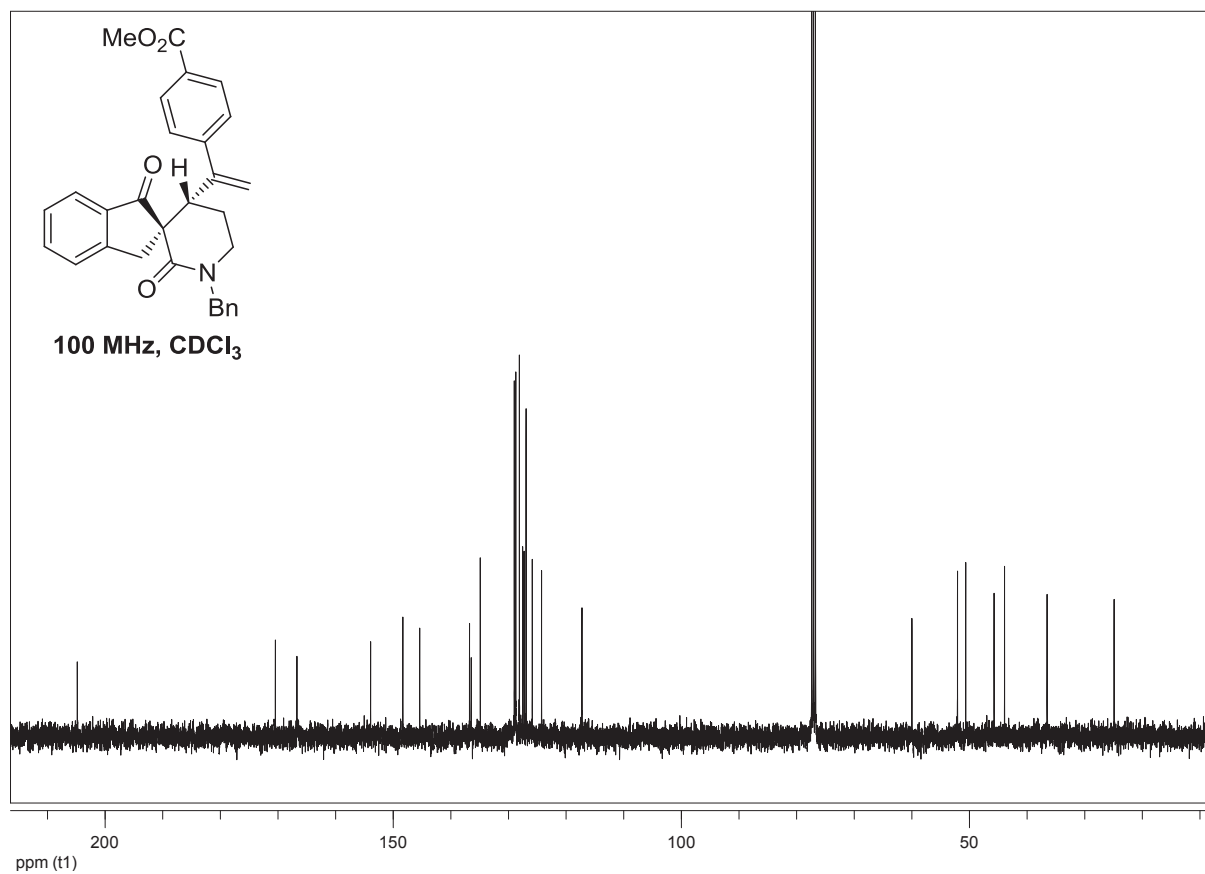

**2a** HPLC: Chiralcel AD; hexane/isopropanol 60:40; 1.0 mL/min

Racemic

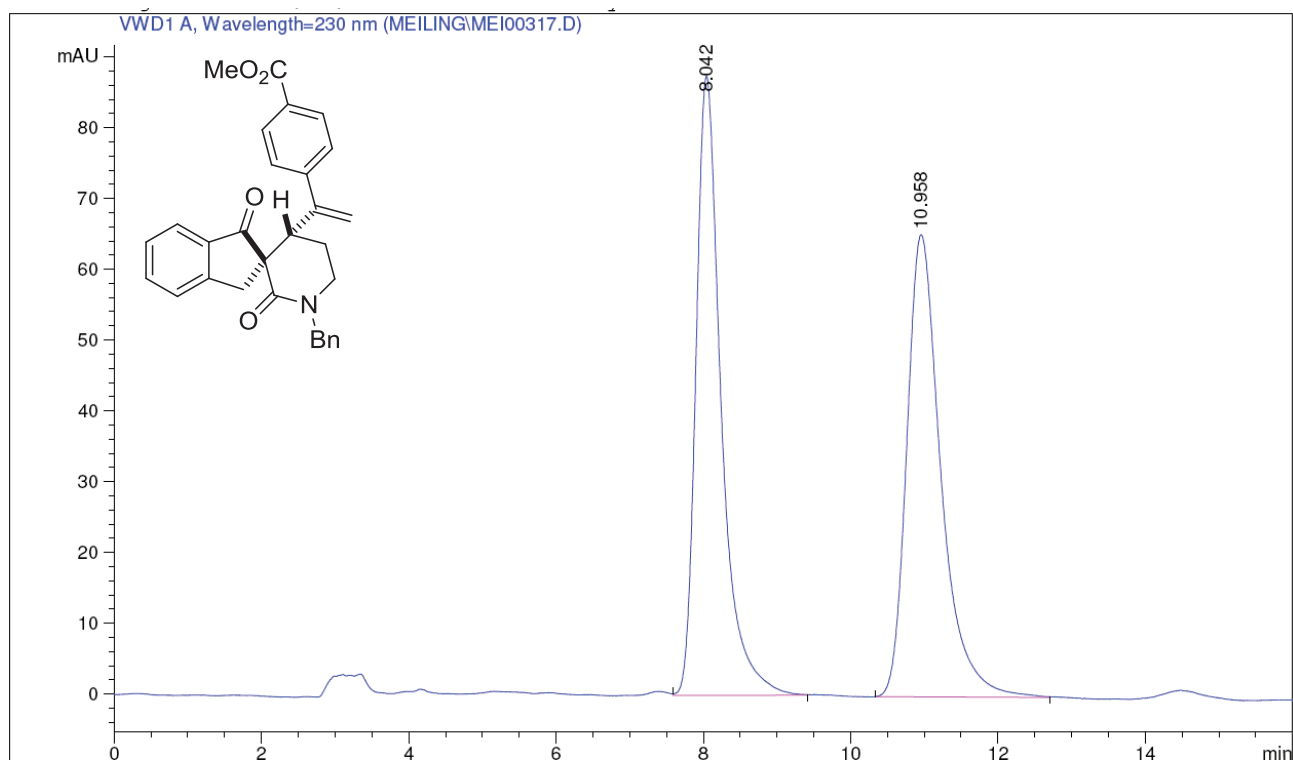

=====  
Area Percent Report  
=====

Sorted By : Signal  
Multiplier : 1.0000  
Dilution : 1.0000  
Use Multiplier & Dilution Factor with ISTDs

Signal 1: VWD1 A, Wavelength=230 nm

| Peak # | RetTime [min] | Type | Width [min] | Area [mAU*s] | Height [mAU] | Area %  |
|--------|---------------|------|-------------|--------------|--------------|---------|
| 1      | 8.042         | VB   | 0.3566      | 2074.07861   | 87.48759     | 49.6621 |
| 2      | 10.958        | BB   | 0.4854      | 2102.30078   | 65.32774     | 50.3379 |

Totals : 4176.37939 152.81533

Results obtained with enhanced integrator!

=====  
\*\*\* End of Report \*\*\*



**2a** HPLC: Chiralcel AD; hexane/isopropanol 60:40; 1.0 mL/min

Enantioenriched

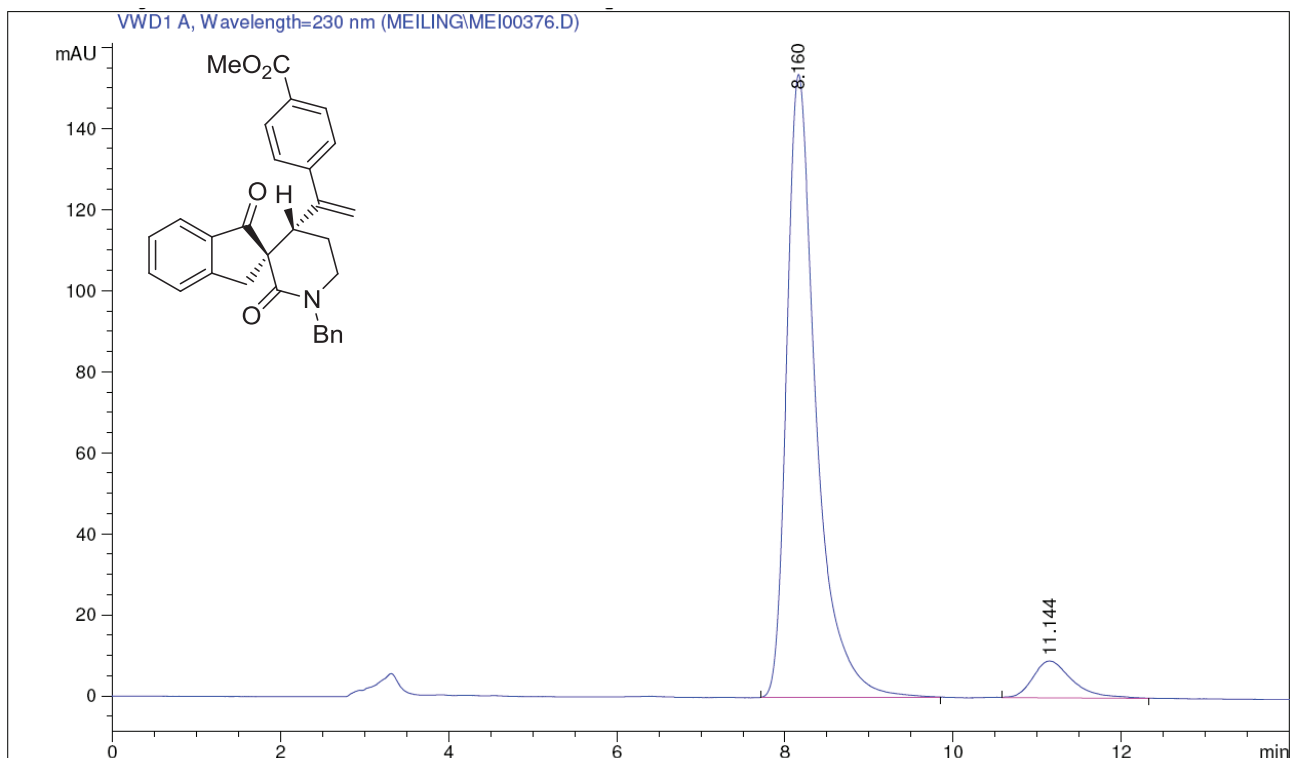

=====  
Area Percent Report  
=====

Sorted By : Signal  
Multiplier : 1.0000  
Dilution : 1.0000  
Use Multiplier & Dilution Factor with ISTDs

Signal 1: VWD1 A, Wavelength=230 nm

| Peak # | RetTime [min] | Type | Width [min] | Area [mAU*s] | Height [mAU] | Area %  |
|--------|---------------|------|-------------|--------------|--------------|---------|
| 1      | 8.160         | BB   | 0.3632      | 3729.39600   | 153.66104    | 92.6855 |
| 2      | 11.144        | BB   | 0.4848      | 294.31284    | 9.06500      | 7.3145  |

Totals : 4023.70883 162.72604

Results obtained with enhanced integrator!

=====  
\*\*\* End of Report \*\*\*

$^1\text{H}$  NMR spectrum of **2b**

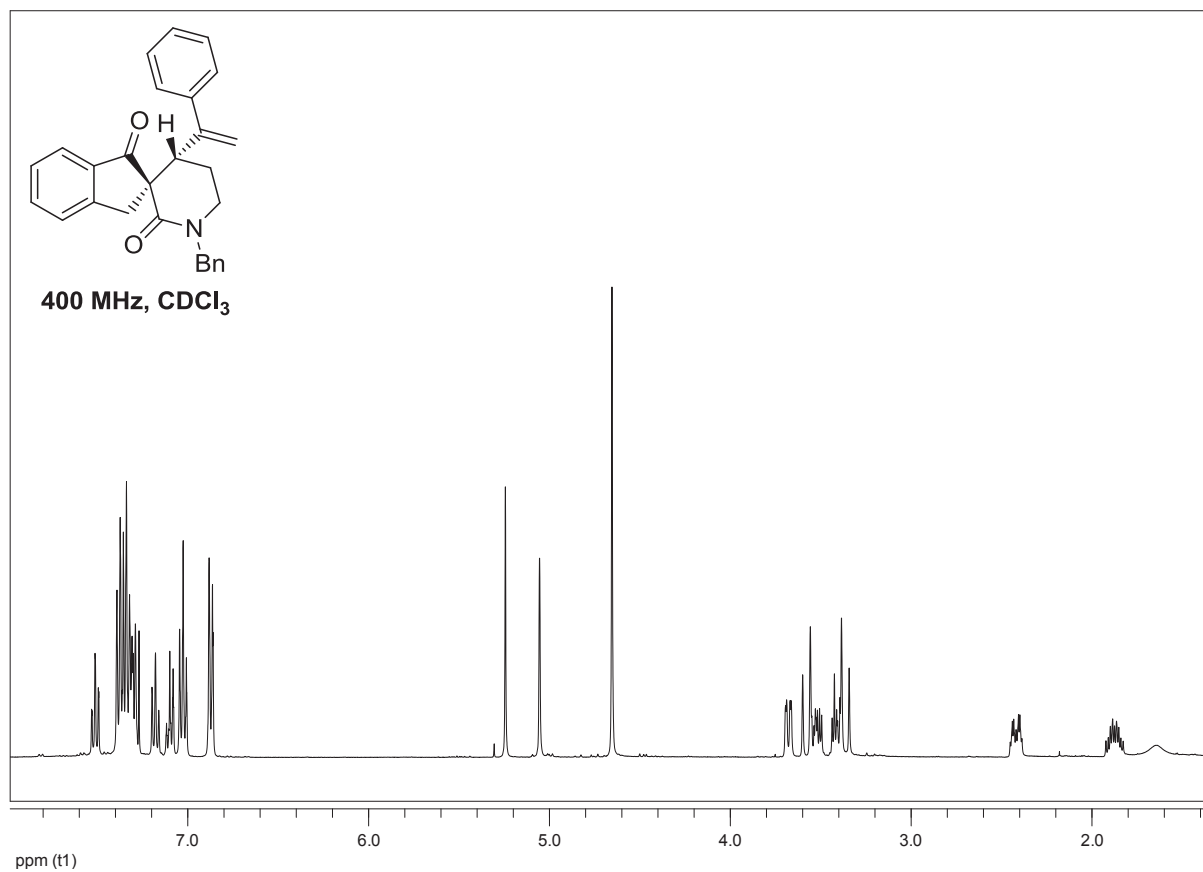

$^{13}\text{C}$  NMR spectrum of **2b**

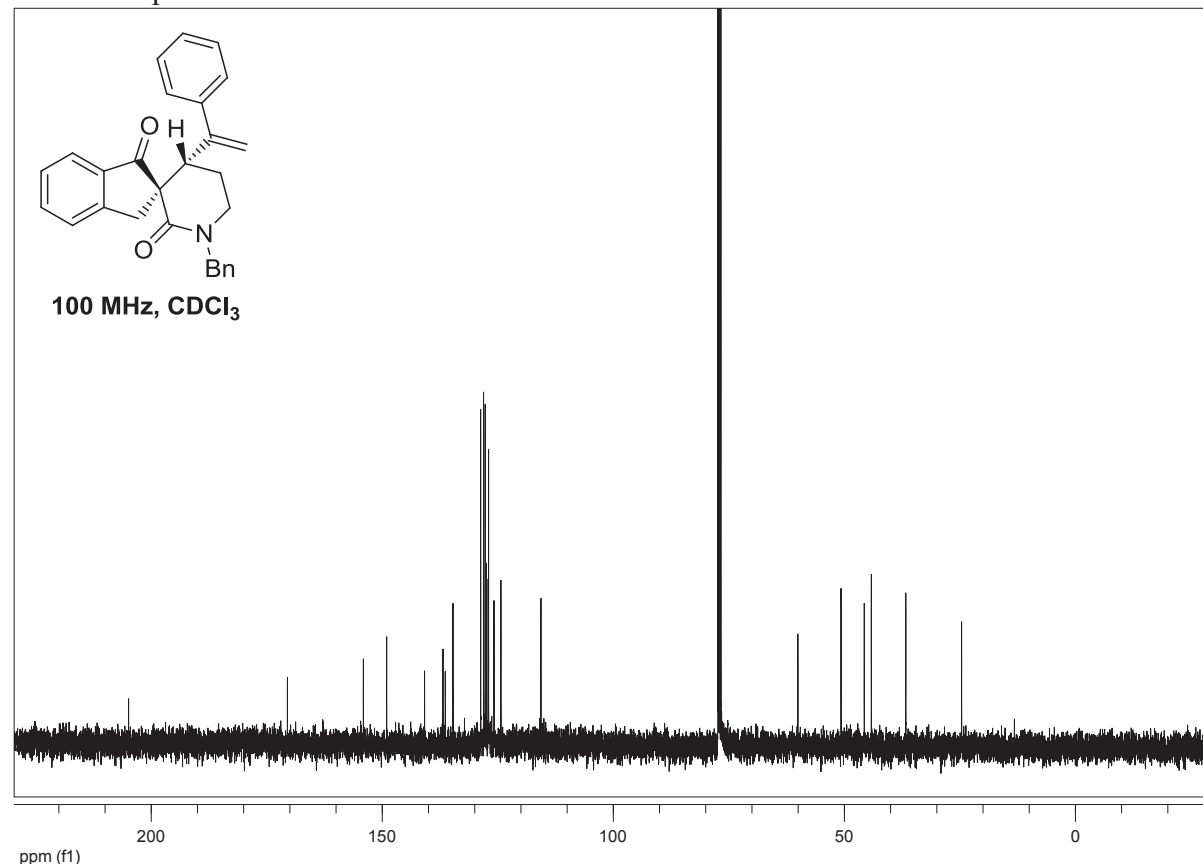

**2b** HPLC: Chiralcel AD; hexane/isopropanol 60:40; 1.0 mL/min

Racemic

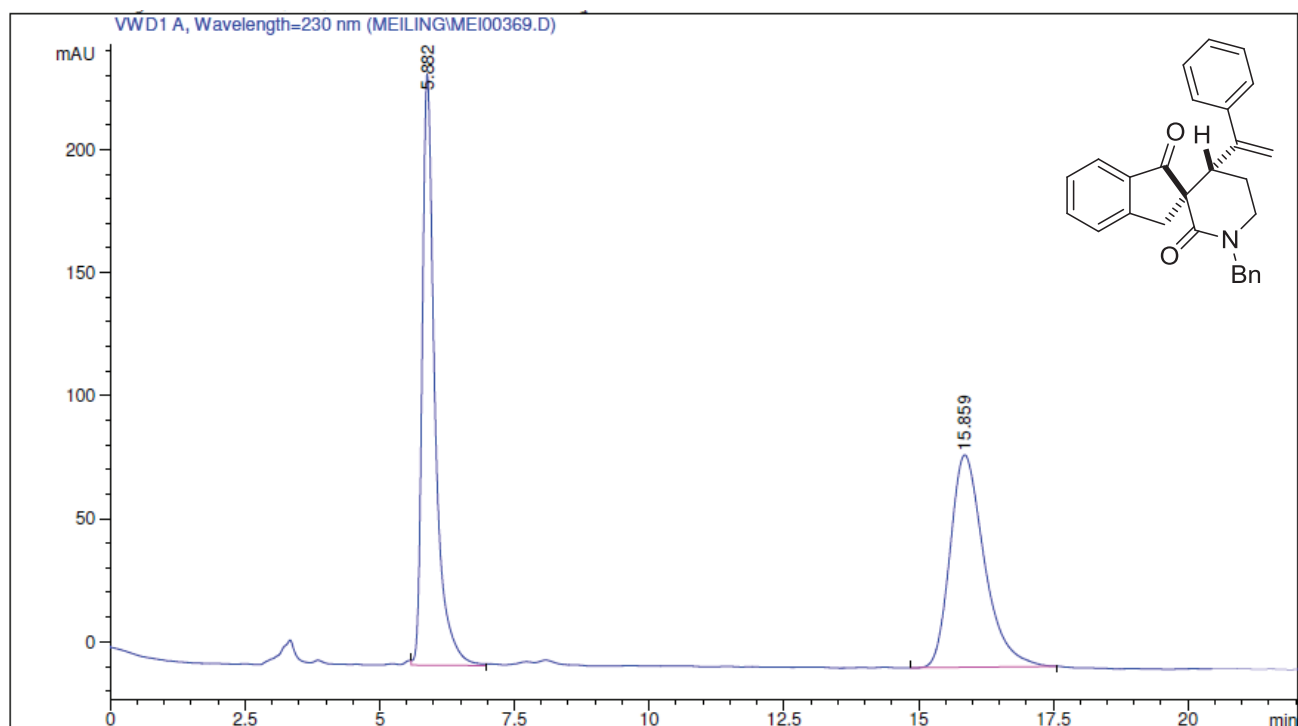

=====  
Area Percent Report  
=====

Sorted By : Signal  
Multiplier : 1.0000  
Dilution : 1.0000  
Use Multiplier & Dilution Factor with ISTDs

Signal 1: VWD1 A, Wavelength=230 nm

| Peak # | RetTime [min] | Type | Width [min] | Area [mAU*s] | Height [mAU] | Area %  |
|--------|---------------|------|-------------|--------------|--------------|---------|
| 1      | 5.882         | VB   | 0.2430      | 3934.46606   | 240.37802    | 50.7733 |
| 2      | 15.859        | PB   | 0.6056      | 3814.61450   | 86.31119     | 49.2267 |

Totals : 7749.08057 326.68921

**2b** HPLC: Chiralcel AD; hexane/isopropanol 60:40; 1.0 mL/min

Enantioenriched

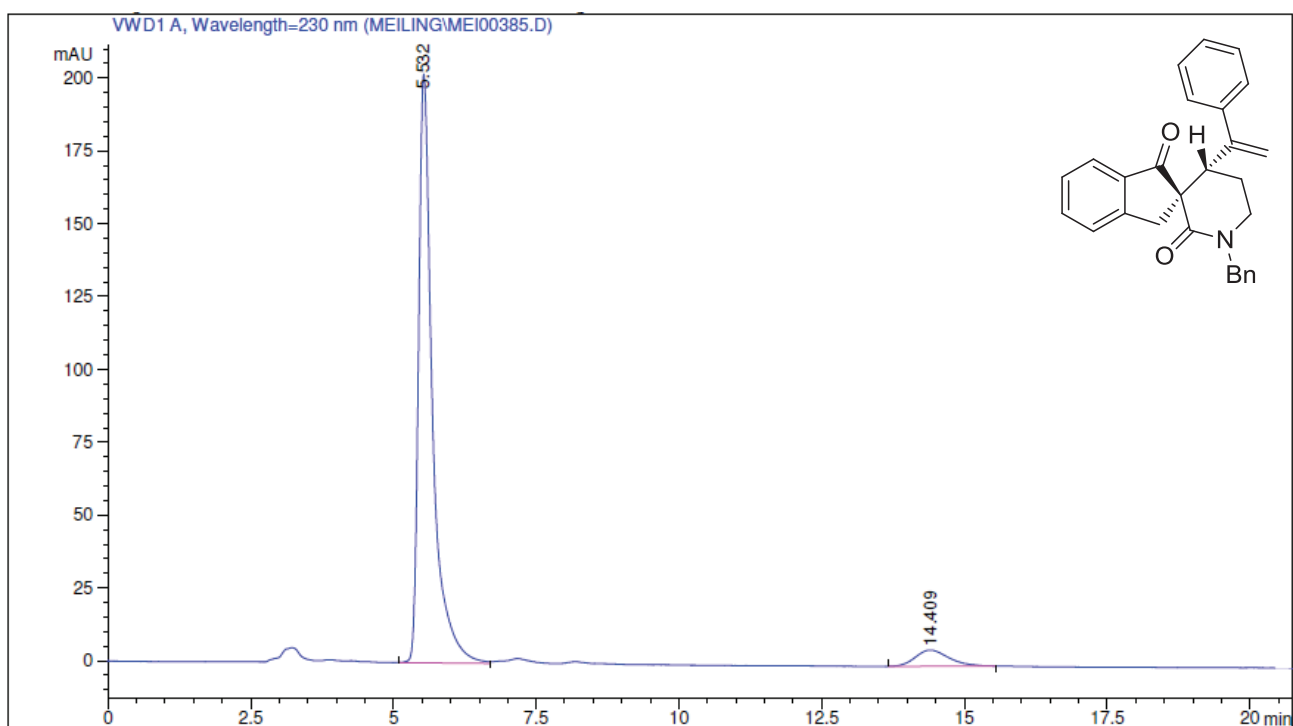

=====  
Area Percent Report  
=====

Sorted By : Signal  
Multiplier : 1.0000  
Dilution : 1.0000  
Use Multiplier & Dilution Factor with ISTDs

Signal 1: VWD1 A, Wavelength=230 nm

| Peak # | RetTime [min] | Type | Width [min] | Area [mAU*s] | Height [mAU] | Area %  |
|--------|---------------|------|-------------|--------------|--------------|---------|
| 1      | 5.532         | BV   | 0.2489      | 3409.95728   | 202.02847    | 93.7336 |
| 2      | 14.409        | BB   | 0.4820      | 227.96500    | 5.54135      | 6.2664  |

Totals : 3637.92227 207.56982

$^1\text{H}$  NMR spectrum of **2c**

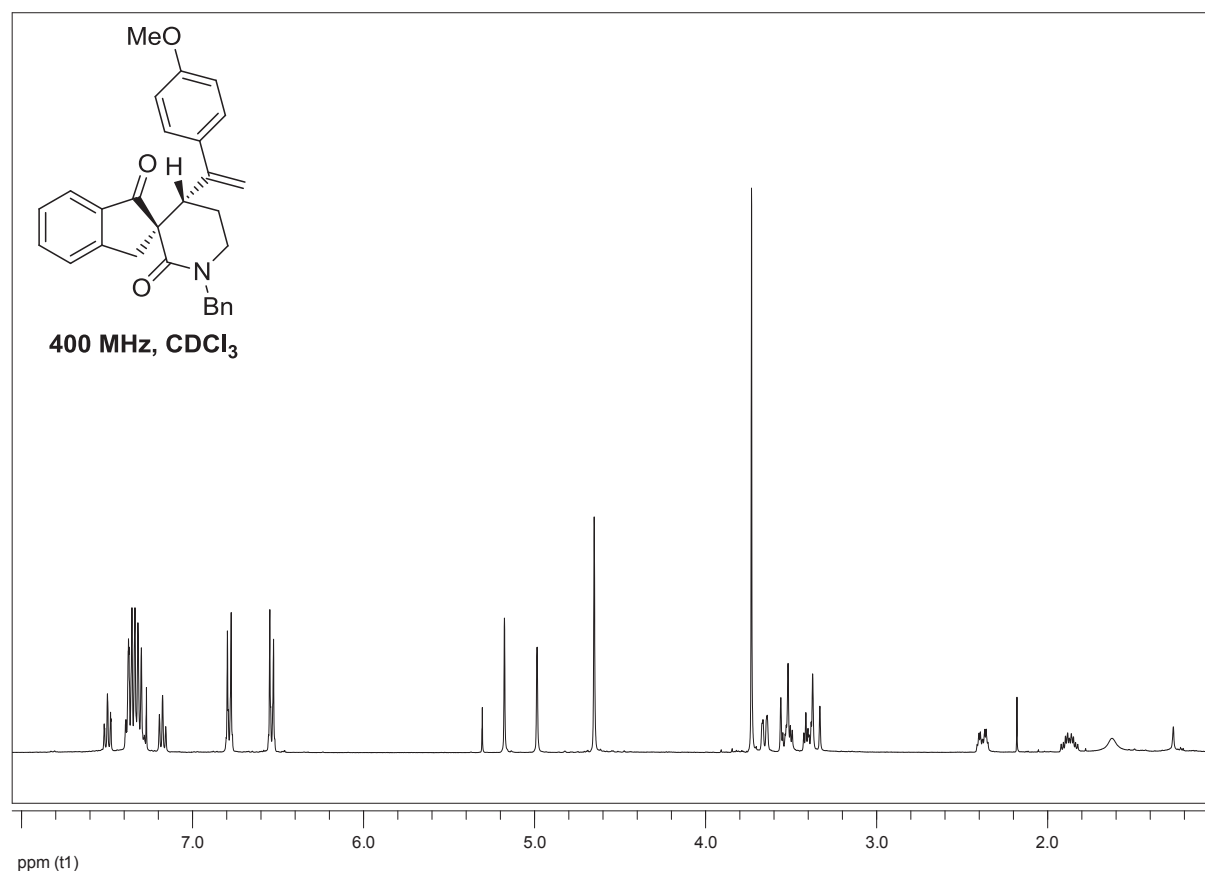

$^{13}\text{C}$  NMR spectrum of **2c**

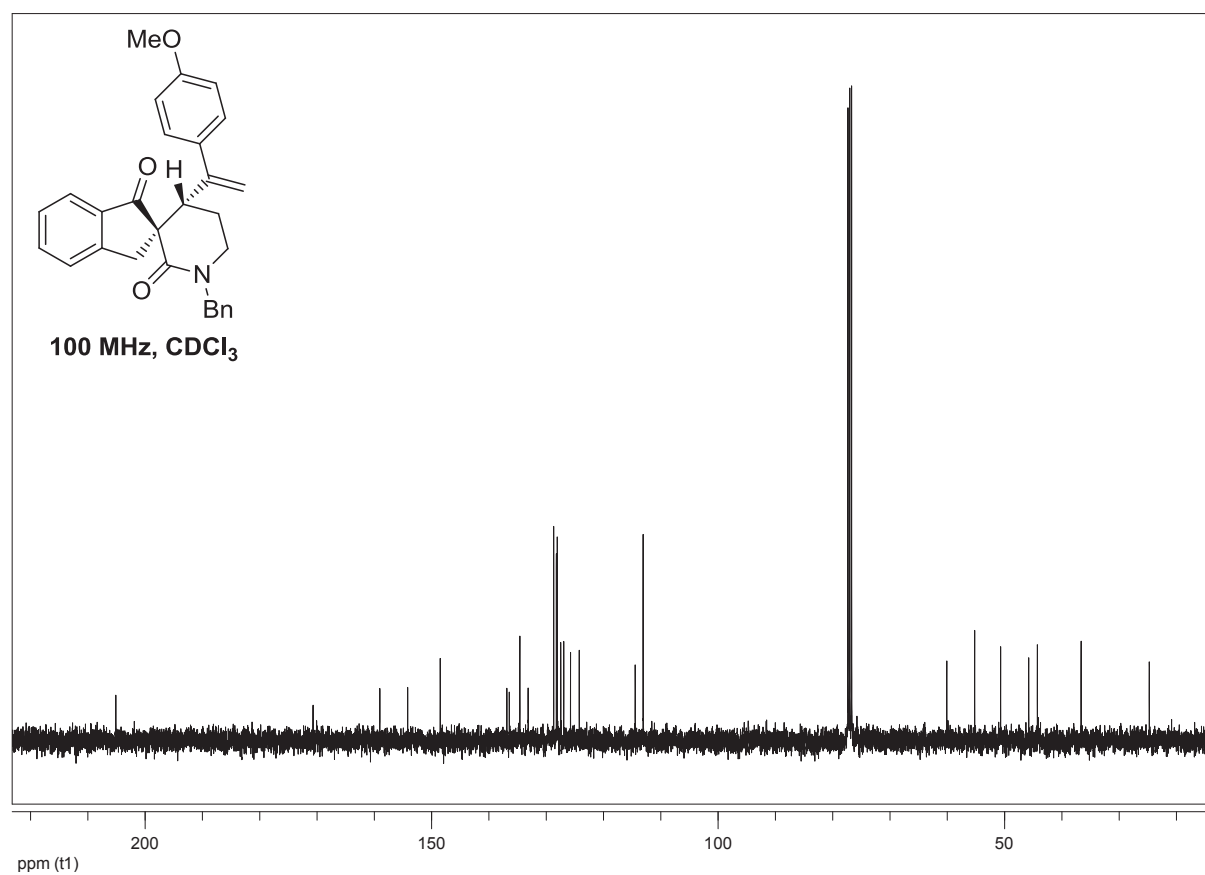

**2c** HPLC: Chiralcel AD; hexane/isopropanol 60:40; 1.0 mL/min

Racemic

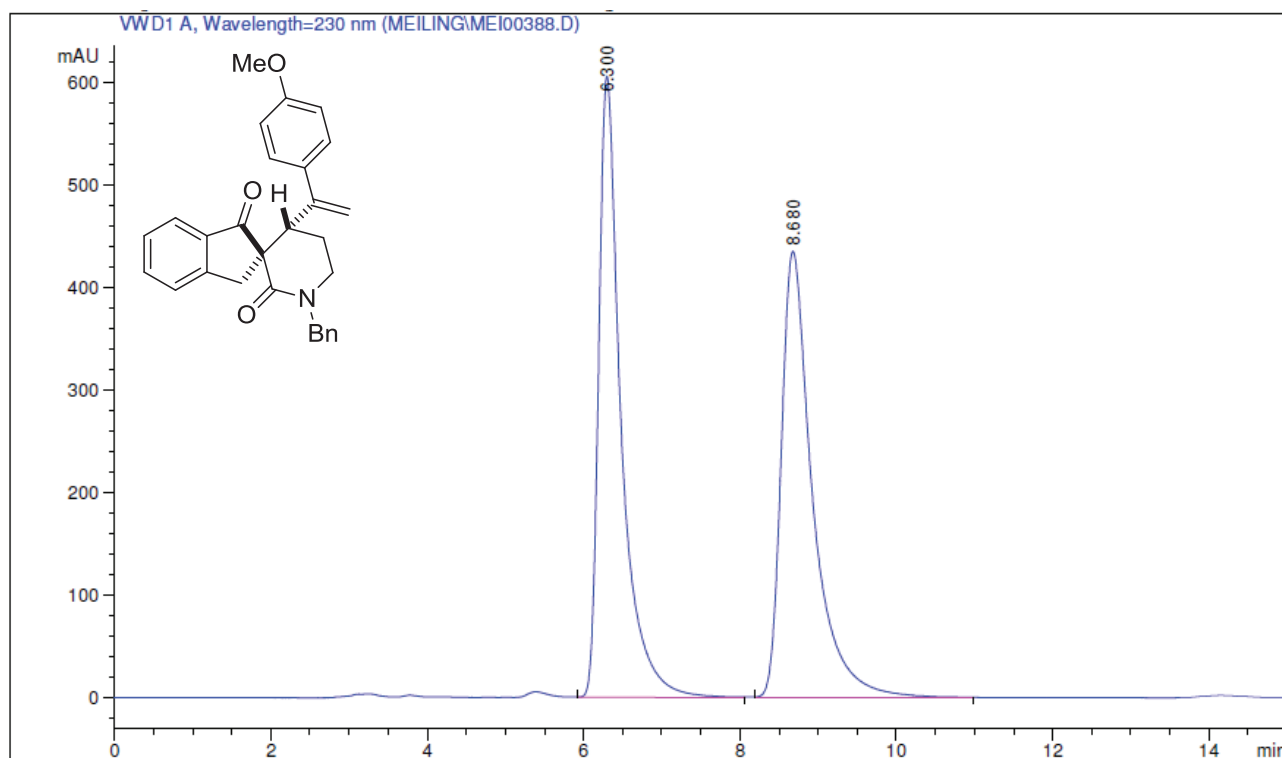

=====  
Area Percent Report  
=====

Sorted By : Signal  
Multiplier : 1.0000  
Dilution : 1.0000  
Use Multiplier & Dilution Factor with ISTDs

Signal 1: VWD1 A, Wavelength=230 nm

| Peak # | RetTime [min] | Type | Width [min] | Area [mAU*s] | Height [mAU] | Area %  |
|--------|---------------|------|-------------|--------------|--------------|---------|
| 1      | 6.300         | VB   | 0.2925      | 1.20695e4    | 605.66840    | 49.9327 |
| 2      | 8.680         | BB   | 0.4104      | 1.21021e4    | 435.17255    | 50.0673 |

Totals : 2.41716e4 1040.84094

2c HPLC: Chiralcel AD; hexane/isopropanol 60:40; 1.0 mL/min

Enantioenriched

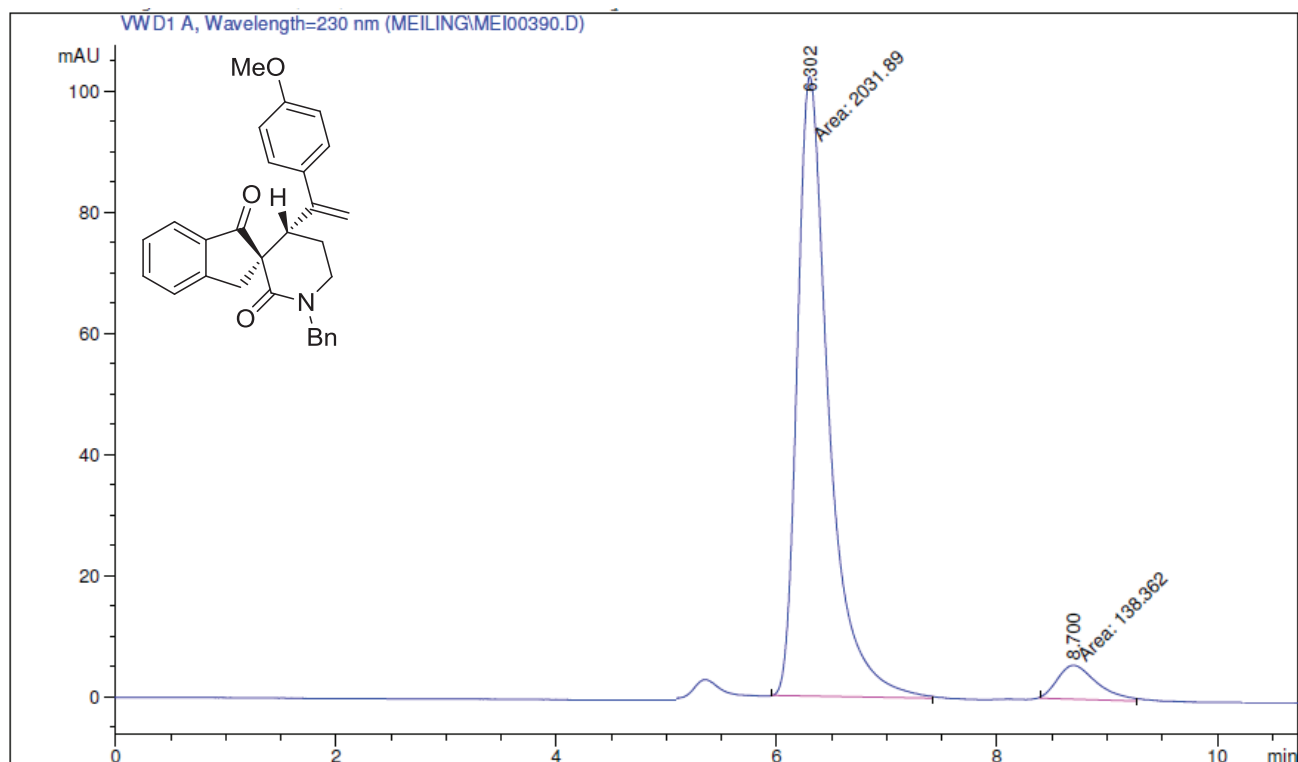

=====  
Area Percent Report  
=====

Sorted By : Signal  
Multiplier : 1.0000  
Dilution : 1.0000  
Use Multiplier & Dilution Factor with ISTDs

Signal 1: VWD1 A, Wavelength=230 nm

| Peak # | RetTime [min] | Type | Width [min] | Area [mAU*s] | Height [mAU] | Area %  |
|--------|---------------|------|-------------|--------------|--------------|---------|
| 1      | 6.302         | MM   | 0.3313      | 2031.89417   | 102.21532    | 93.6246 |
| 2      | 8.700         | MM   | 0.4136      | 138.36247    | 5.57573      | 6.3754  |

Totals : 2170.25664 107.79106

Results obtained with enhanced integrator!

=====  
\*\*\* End of Report \*\*\*

$^1\text{H}$  NMR spectrum of **2d**

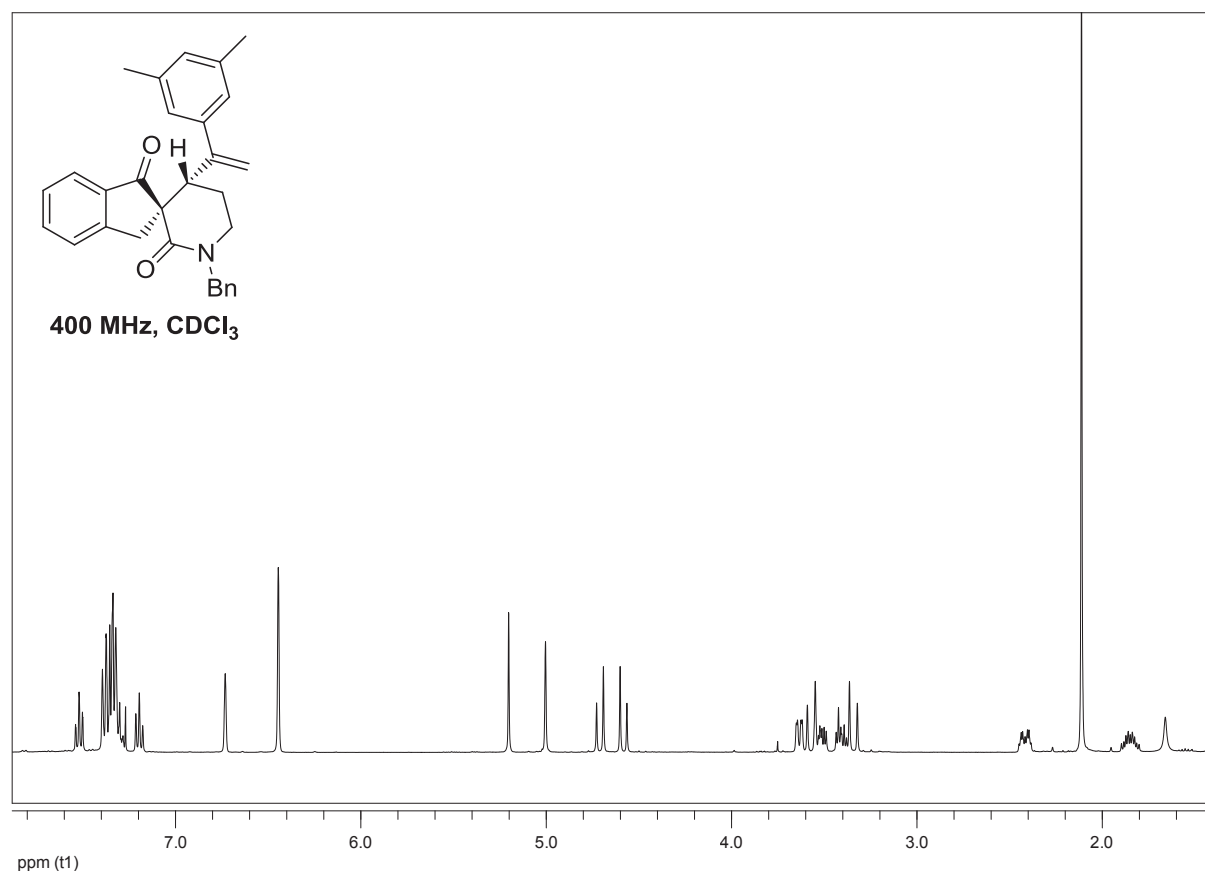

$^{13}\text{C}$  NMR spectrum of **2d**

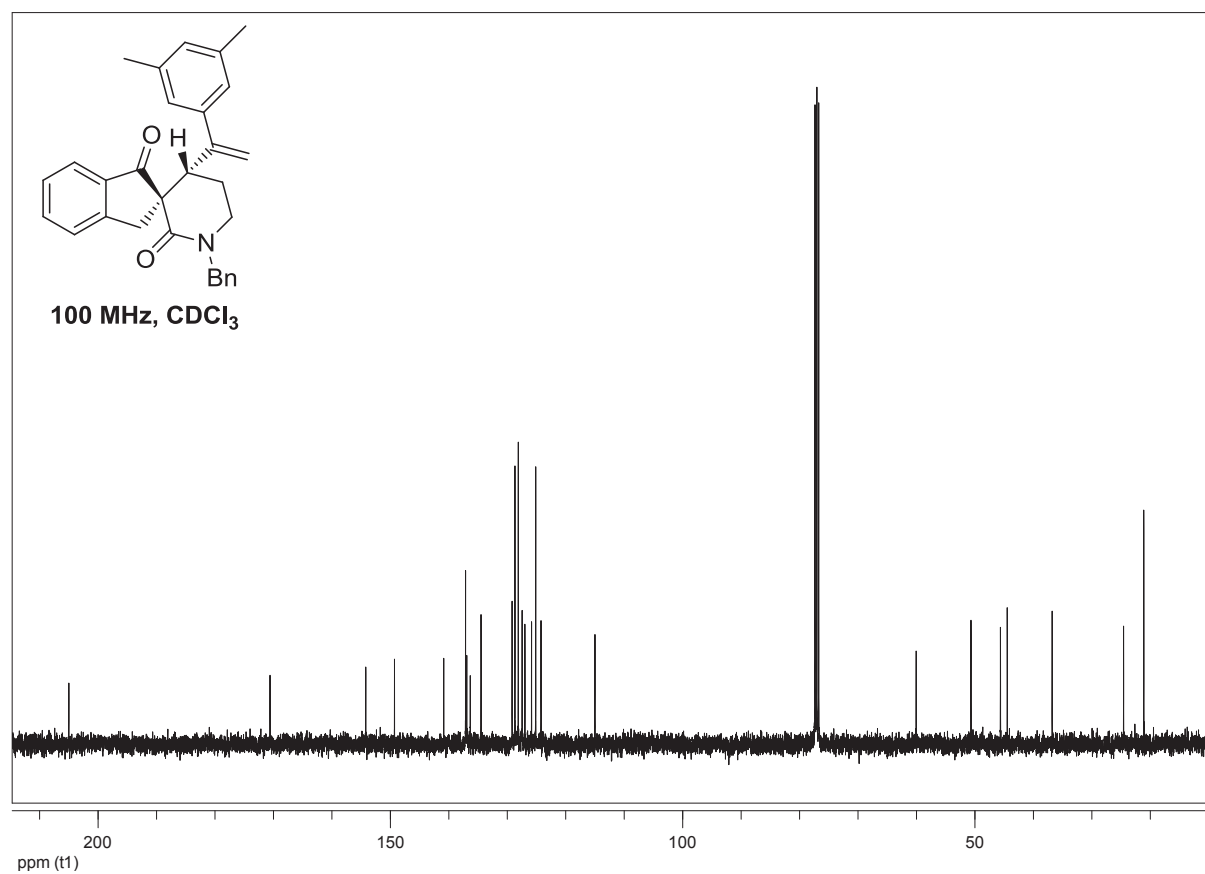



**2d** HPLC: Chiralcel AD; hexane/isopropanol 60:40; 1.0 mL/min

Racemic

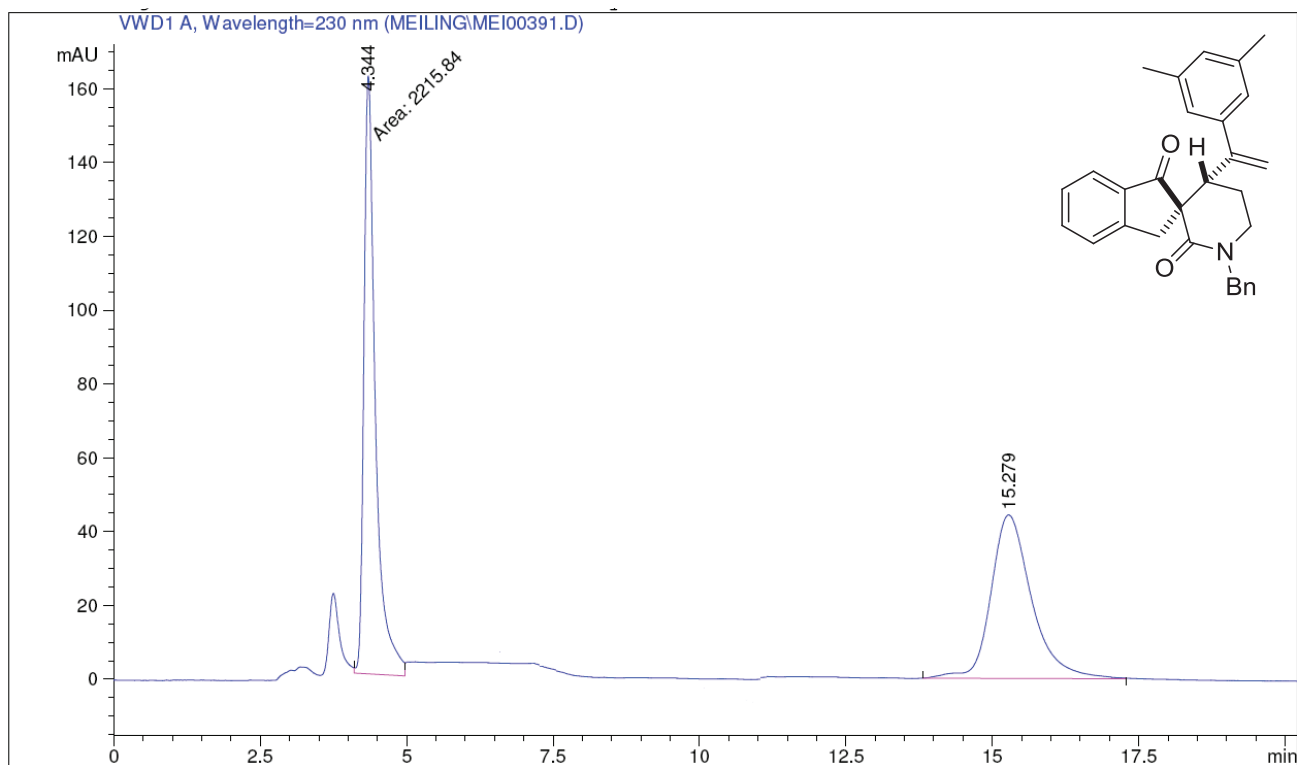

=====  
Area Percent Report  
=====

Sorted By : Signal  
Multiplier : 1.0000  
Dilution : 1.0000  
Use Multiplier & Dilution Factor with ISTDs

Signal 1: VWD1 A, Wavelength=230 nm

| Peak # | RetTime [min] | Type | Width [min] | Area [mAU*s] | Height [mAU] | Area %  |
|--------|---------------|------|-------------|--------------|--------------|---------|
| 1      | 4.344         | MM   | 0.2278      | 2215.84448   | 162.14415    | 50.7536 |
| 2      | 15.279        | BB   | 0.7299      | 2150.04419   | 44.32693     | 49.2464 |

Totals : 4365.88867 206.47108

Results obtained with enhanced integrator!

=====  
\*\*\* End of Report \*\*\*  
=====

**2d** HPLC: Chiralcel AD; hexane/isopropanol 60:40; 1.0 mL/min

Enantioenriched

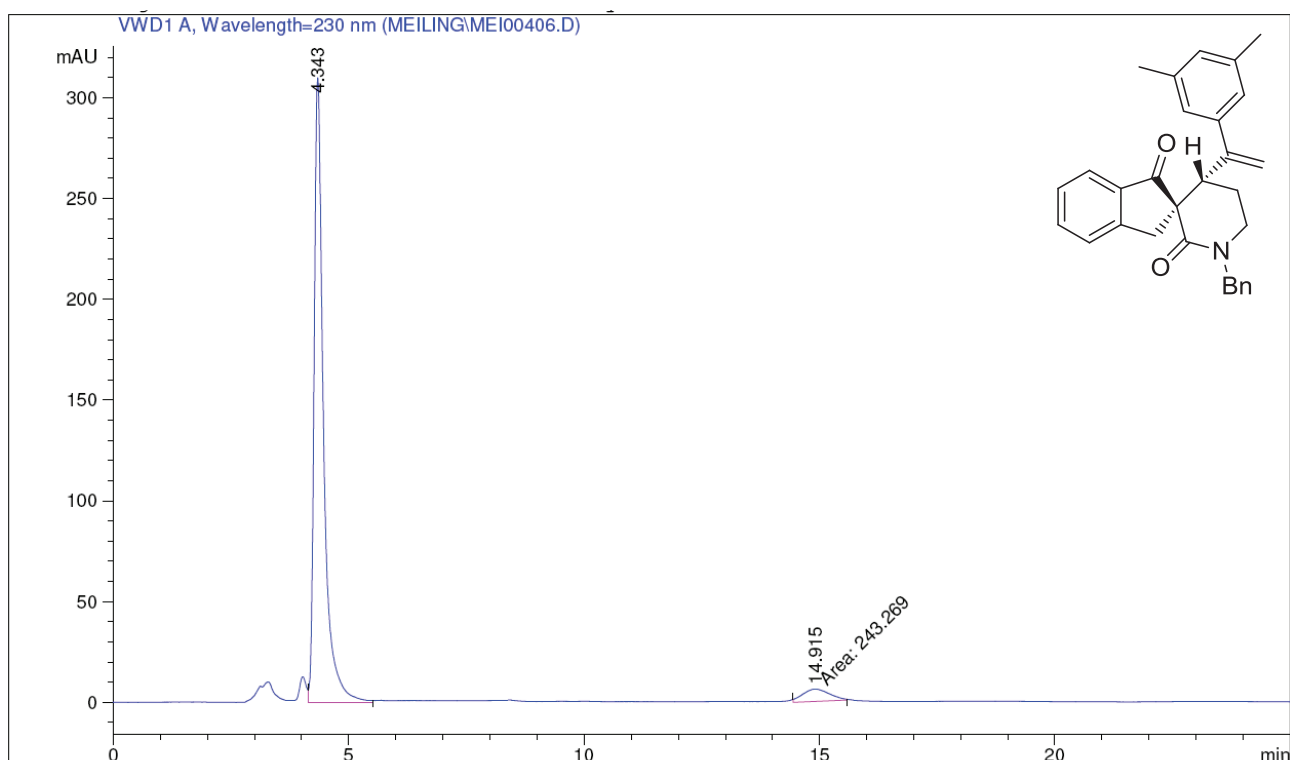

=====  
Area Percent Report  
=====

Sorted By : Signal  
Multiplier : 1.0000  
Dilution : 1.0000  
Use Multiplier & Dilution Factor with ISTDs

Signal 1: VWD1 A, Wavelength=230 nm

| Peak # | RetTime [min] | Type | Width [min] | Area [mAU*s] | Height [mAU] | Area %  |
|--------|---------------|------|-------------|--------------|--------------|---------|
| 1      | 4.343         | VB   | 0.2061      | 4306.41846   | 309.92630    | 94.6531 |
| 2      | 14.915        | MM   | 0.4766      | 243.26886    | 6.07218      | 5.3469  |

Totals : 4549.68732 315.99848

Results obtained with enhanced integrator!

=====  
\*\*\* End of Report \*\*\*

$^1\text{H}$  NMR spectrum of **2e**

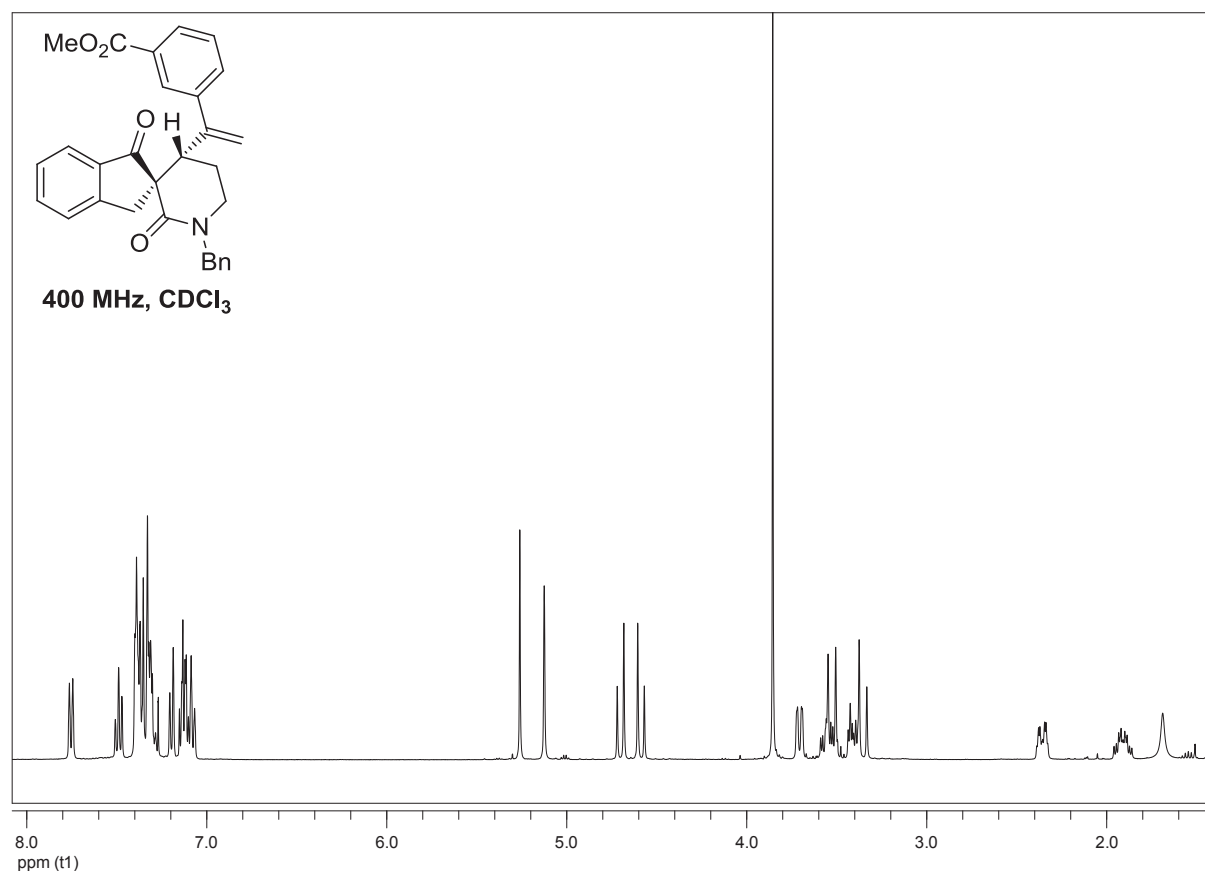

$^{13}\text{C}$  NMR spectrum of **2e**

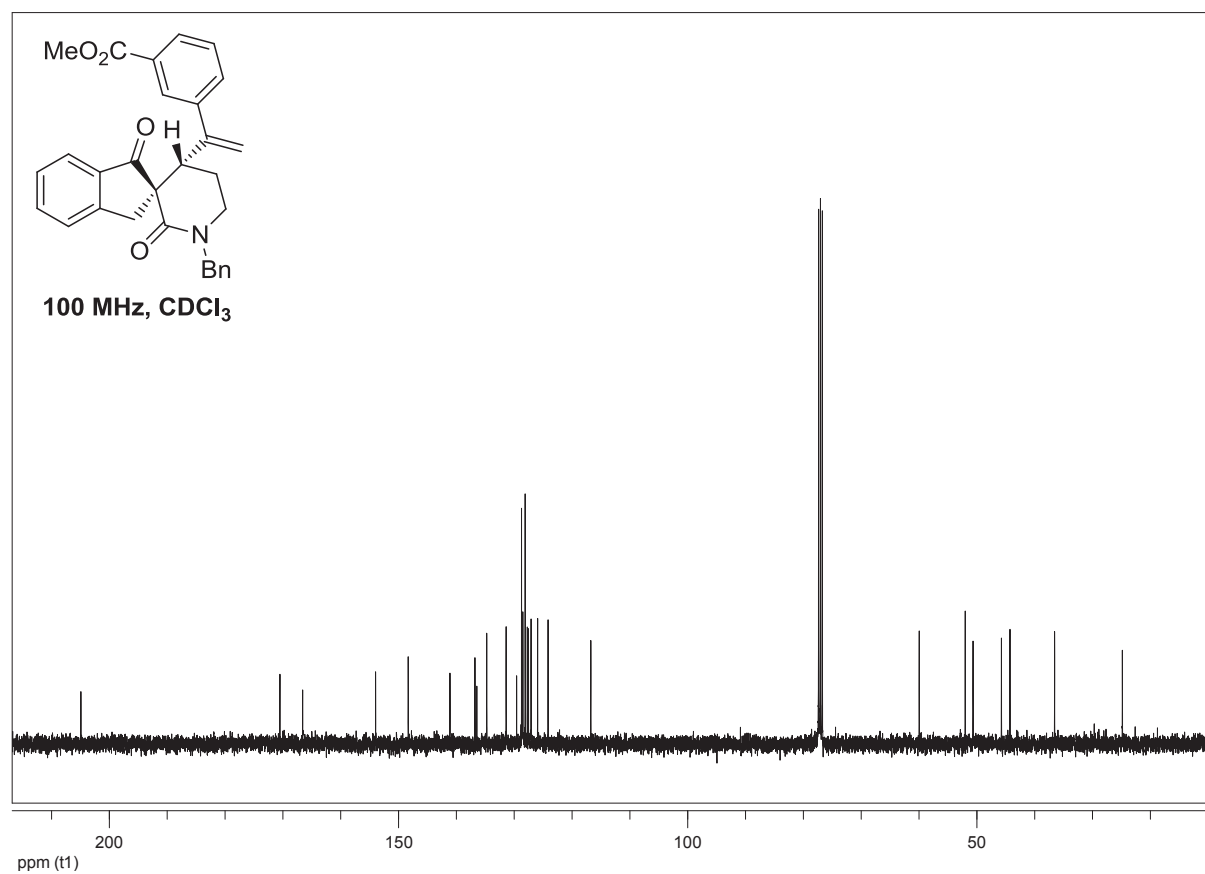

2e HPLC: Chiralcel AD; hexane/isopropanol 60:40; 1.0 mL/min

Racemic

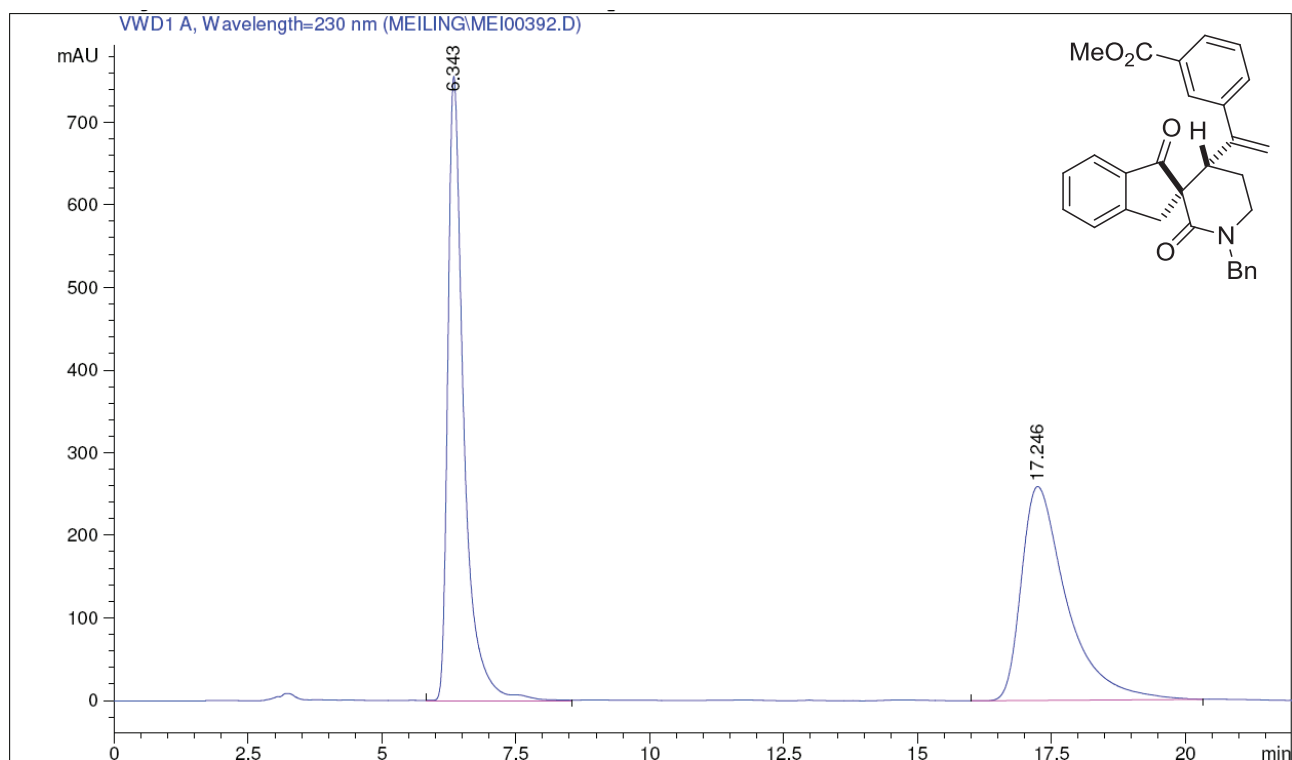

=====  
Area Percent Report  
=====

Sorted By : Signal  
Multiplier : 1.0000  
Dilution : 1.0000  
Use Multiplier & Dilution Factor with ISTDs

Signal 1: VWD1 A, Wavelength=230 nm

| Peak # | RetTime [min] | Type | Width [min] | Area [mAU*s] | Height [mAU] | Area %  |
|--------|---------------|------|-------------|--------------|--------------|---------|
| 1      | 6.343         | BB   | 0.3087      | 1.57139e4    | 755.40088    | 50.7575 |
| 2      | 17.246        | VB   | 0.8770      | 1.52449e4    | 258.88623    | 49.2425 |

Totals : 3.09588e4 1014.28711

Results obtained with enhanced integrator!

=====  
\*\*\* End of Report \*\*\*

2e HPLC: Chiralcel AD; hexane/isopropanol 60:40; 1.0 mL/min

Enantioenriched

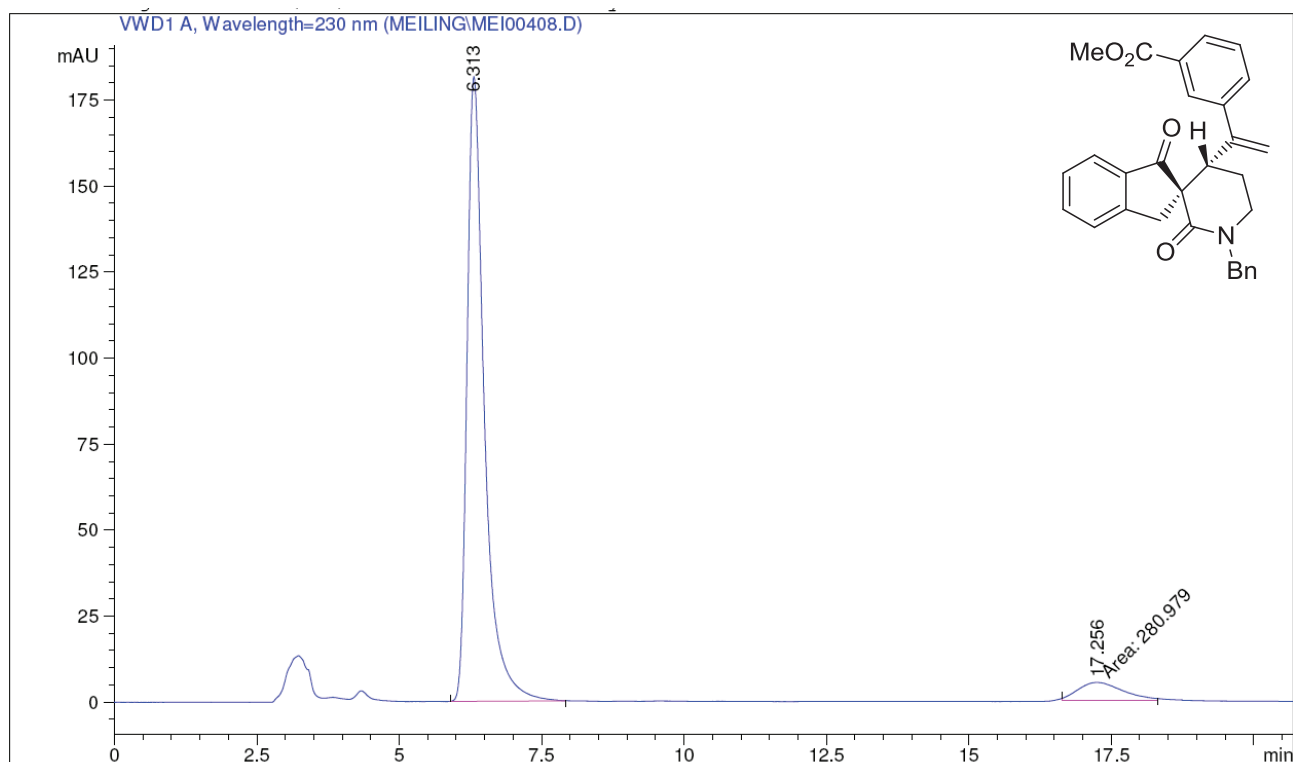

=====  
Area Percent Report  
=====

Sorted By : Signal  
Multiplier : 1.0000  
Dilution : 1.0000  
Use Multiplier & Dilution Factor with ISTDs

Signal 1: VWD1 A, Wavelength=230 nm

| Peak # | RetTime [min] | Type | Width [min] | Area [mAU*s] | Height [mAU] | Area %  |
|--------|---------------|------|-------------|--------------|--------------|---------|
| 1      | 6.313         | BB   | 0.3181      | 3860.28247   | 181.52113    | 93.2151 |
| 2      | 17.256        | MM   | 0.9065      | 280.97888    | 5.16583      | 6.7849  |

Totals : 4141.26135 186.68697

Results obtained with enhanced integrator!

=====  
\*\*\* End of Report \*\*\*

$^1\text{H}$  NMR spectrum of **2f**

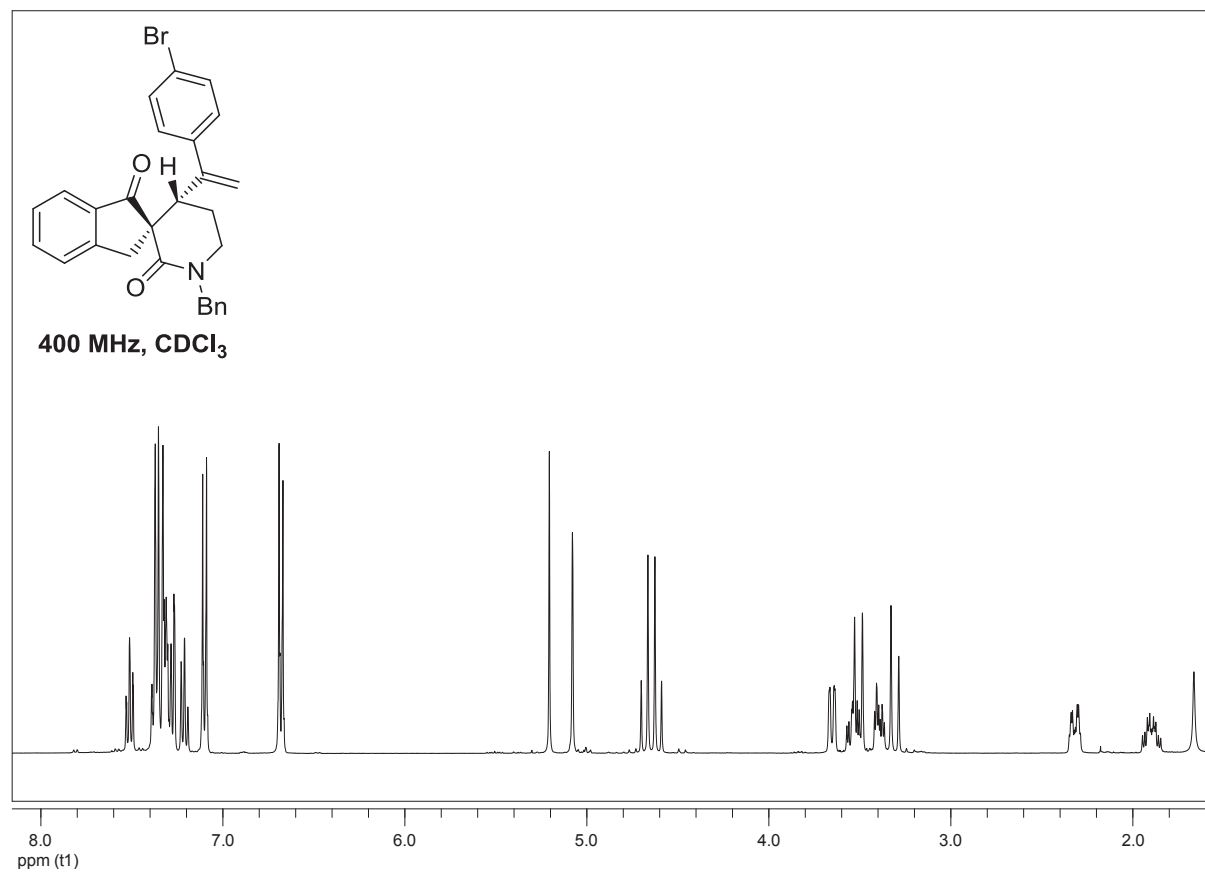

$^{13}\text{C}$  NMR spectrum of **2f**

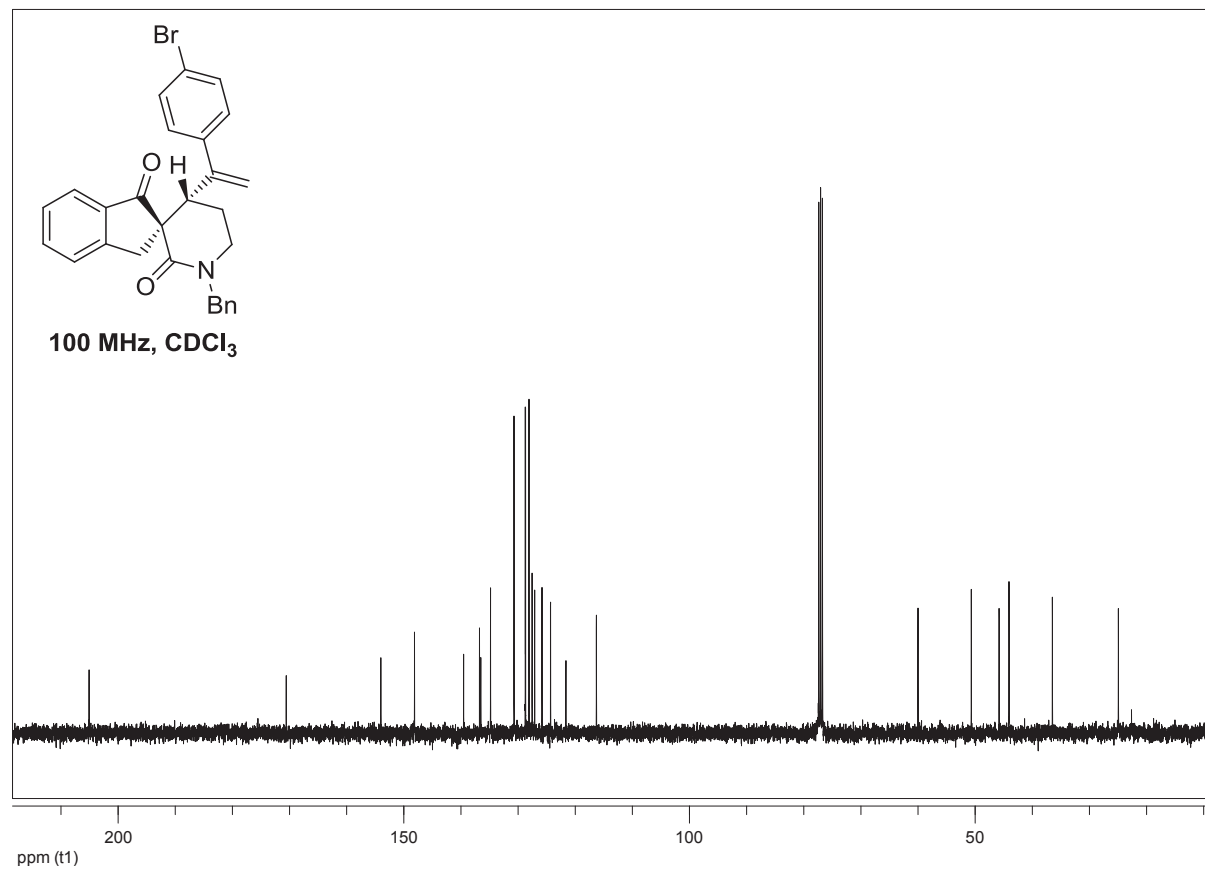

**2f** HPLC: Chiralcel AD; hexane/isopropanol 60:40; 1.0 mL/min

Racemic

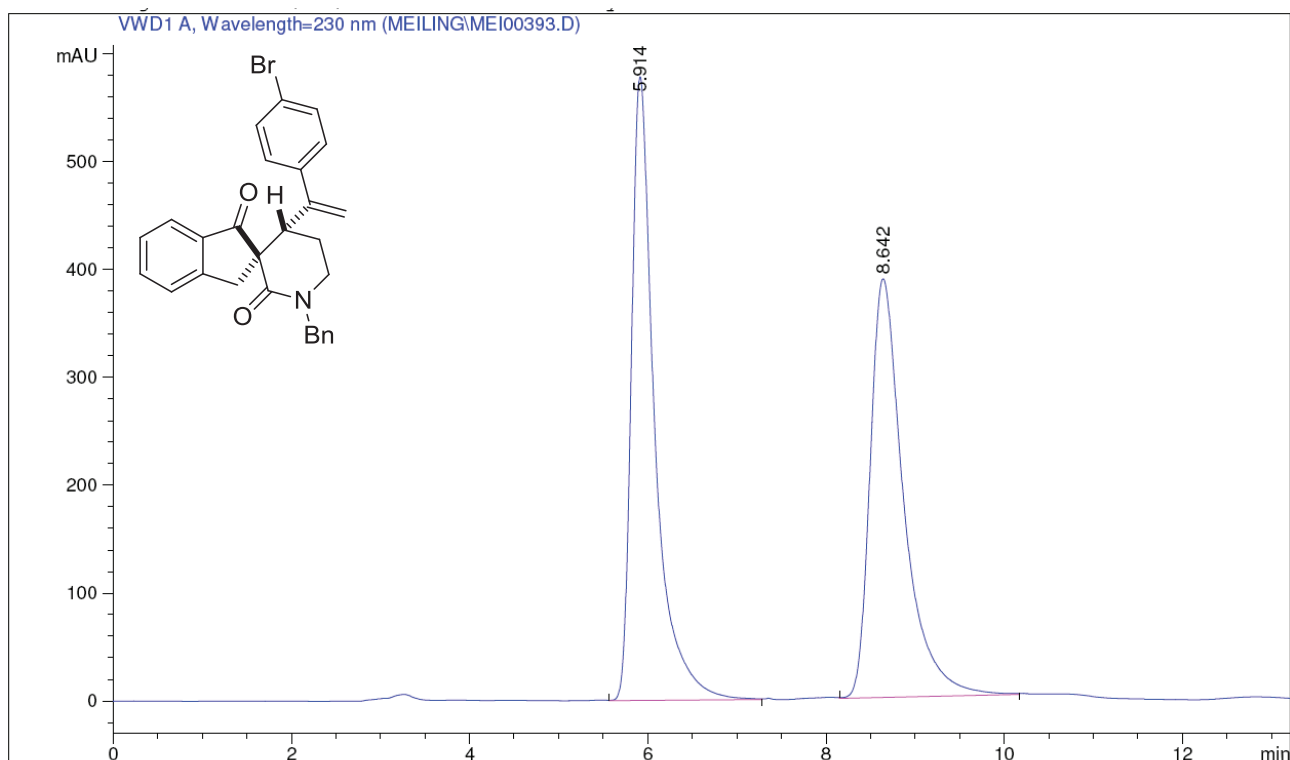

=====  
Area Percent Report  
=====

Sorted By : Signal  
Multiplier : 1.0000  
Dilution : 1.0000  
Use Multiplier & Dilution Factor with ISTDs

Signal 1: VWD1 A, Wavelength=230 nm

| Peak # | RetTime [min] | Type | Width [min] | Area [mAU*s] | Height [mAU] | Area %  |
|--------|---------------|------|-------------|--------------|--------------|---------|
| 1      | 5.914         | VV   | 0.2673      | 1.04774e4    | 578.38678    | 50.7740 |
| 2      | 8.642         | VB   | 0.3914      | 1.01580e4    | 388.08847    | 49.2260 |

Totals : 2.06354e4 966.47525

Results obtained with enhanced integrator!

=====  
\*\*\* End of Report \*\*\*

2f HPLC: Chiralcel AD; hexane/isopropanol 60:40; 1.0 mL/min

Enantioenriched

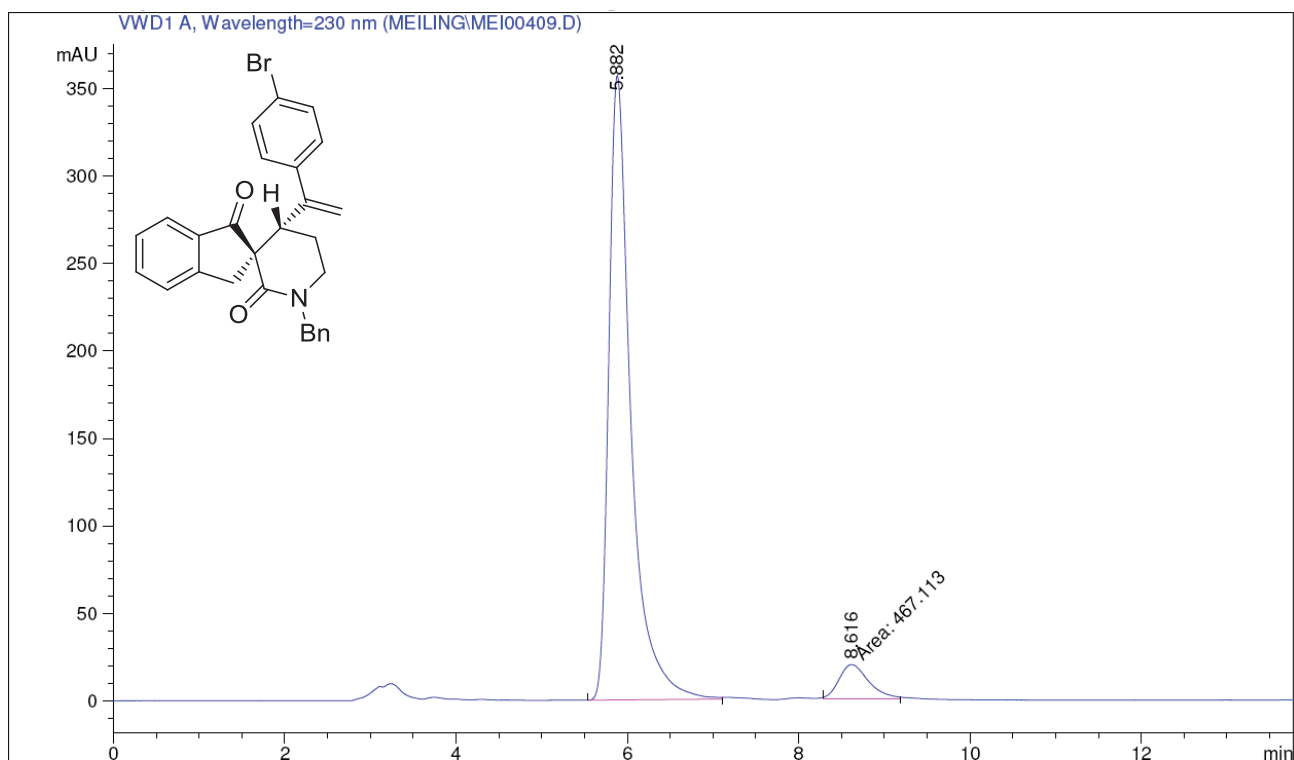

=====  
Area Percent Report  
=====

Sorted By : Signal  
Multiplier : 1.0000  
Dilution : 1.0000  
Use Multiplier & Dilution Factor with ISTDs

Signal 1: VWD1 A, Wavelength=230 nm

| Peak # | RetTime [min] | Type | Width [min] | Area [mAU*s] | Height [mAU] | Area %  |
|--------|---------------|------|-------------|--------------|--------------|---------|
| 1      | 5.882         | PB   | 0.2678      | 6414.06738   | 356.68668    | 93.2117 |
| 2      | 8.616         | MM   | 0.3993      | 467.11343    | 19.49923     | 6.7883  |

Totals : 6881.18082 376.18590

Results obtained with enhanced integrator!

=====  
\*\*\* End of Report \*\*\*



$^1\text{H}$  NMR spectrum of **2g**

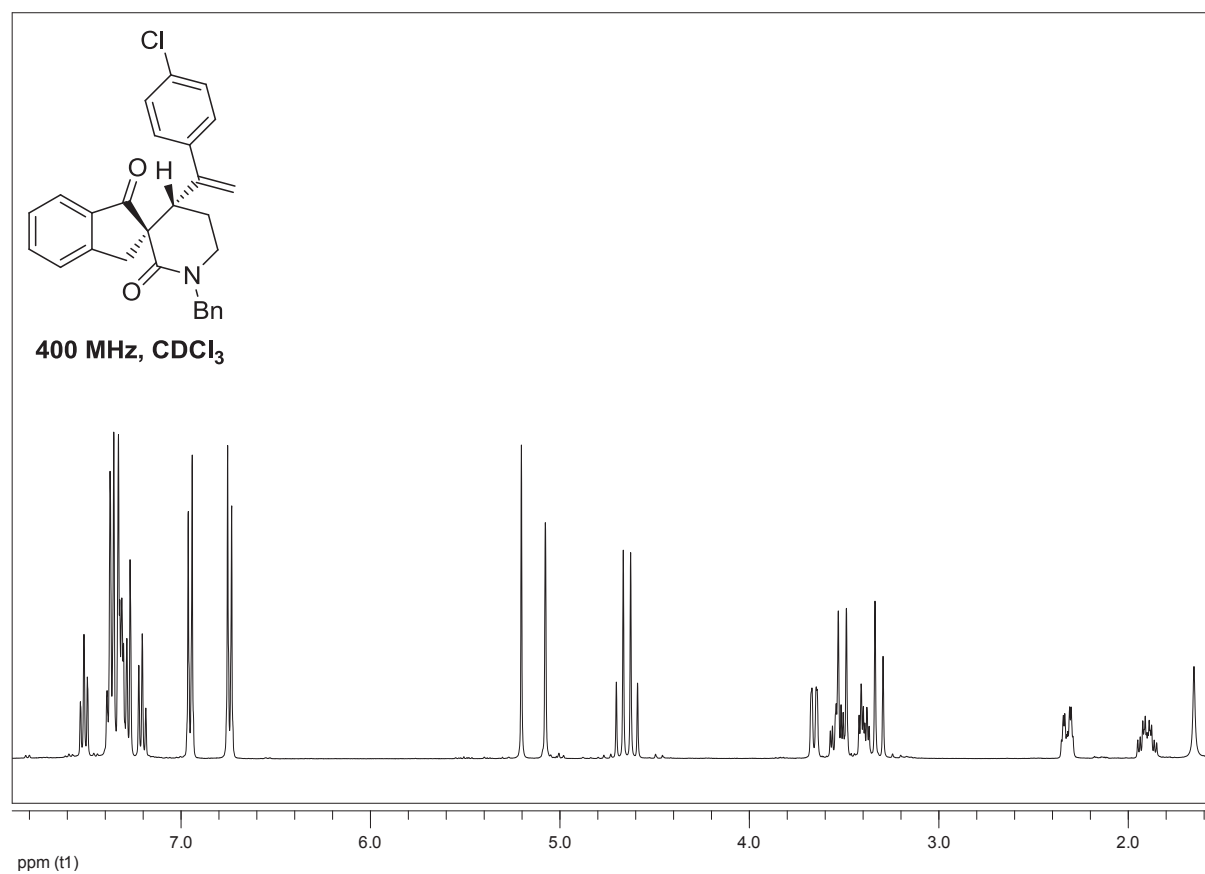

$^{13}\text{C}$  NMR spectrum of **2g**

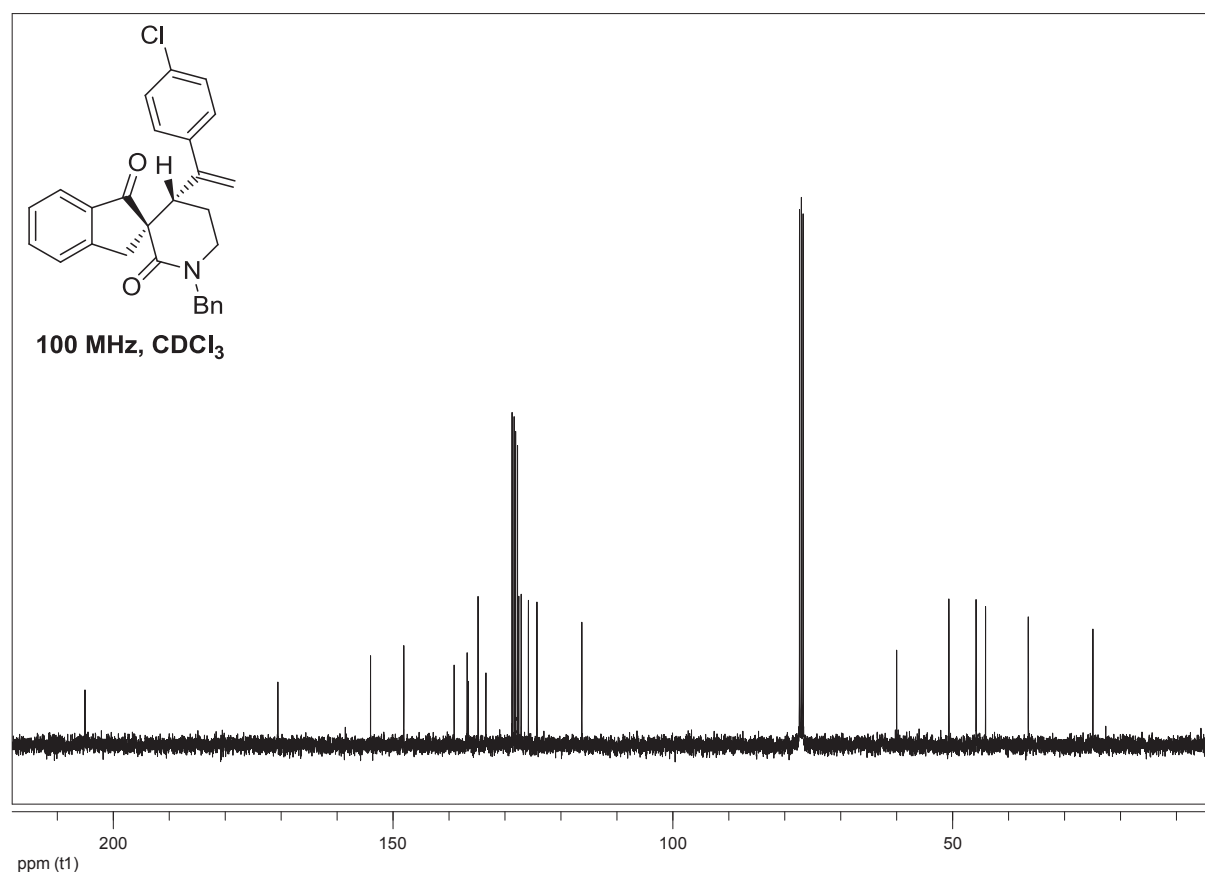

**2g** HPLC: Chiralcel AD; hexane/isopropanol 60:40; 1.0 mL/min

Racemic: Mixture of 2 diastereomers

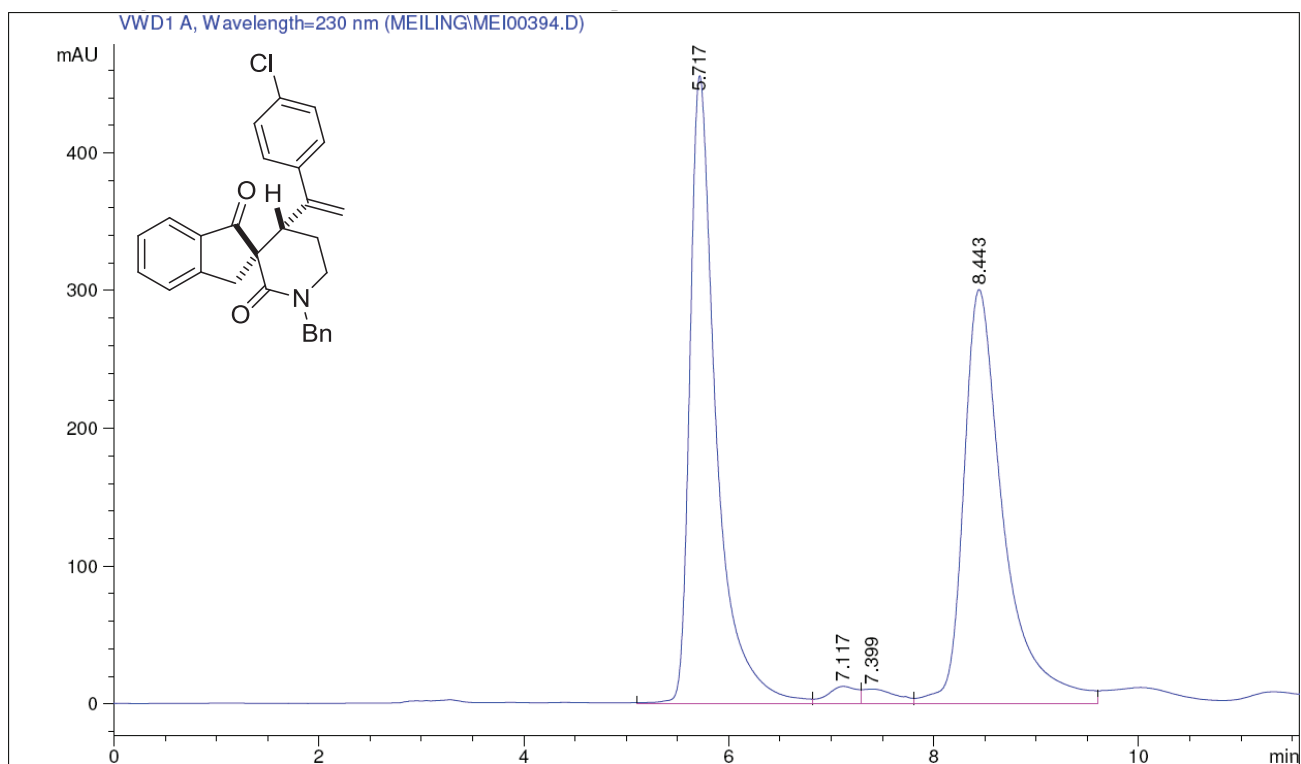

=====  
Area Percent Report  
=====

Sorted By : Signal  
Multiplier : 1.0000  
Dilution : 1.0000  
Use Multiplier & Dilution Factor with ISTDs

Signal 1: VWD1 A, Wavelength=230 nm

| Peak # | RetTime [min] | Type | Width [min] | Area [mAU*s] | Height [mAU] | Area %  |
|--------|---------------|------|-------------|--------------|--------------|---------|
| 1      | 5.717         | BV   | 0.2623      | 8136.26270   | 455.67233    | 48.5110 |
| 2      | 7.117         | VV   | 0.2897      | 247.10759    | 12.44256     | 1.4733  |
| 3      | 7.399         | VV   | 0.3291      | 237.97835    | 10.47460     | 1.4189  |
| 4      | 8.443         | VV   | 0.3985      | 8150.64746   | 300.48026    | 48.5968 |

Totals : 1.67720e4 779.06975

Results obtained with enhanced integrator!

=====  
\*\*\* End of Report \*\*\*

**2g** HPLC: Chiralcel AD; hexane/isopropanol 60:40; 1.0 mL/min

Enantioenriched: Major diastereomer

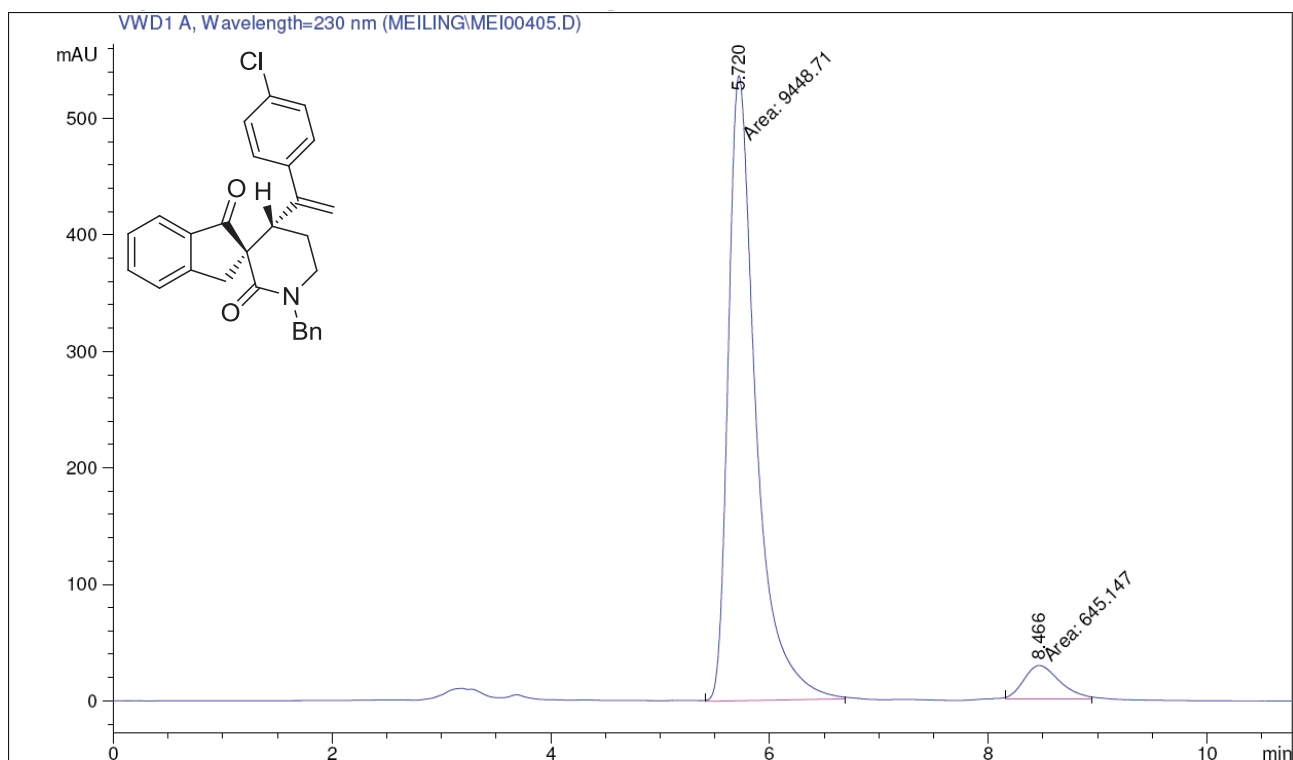

=====  
Area Percent Report  
=====

Sorted By : Signal  
Multiplier : 1.0000  
Dilution : 1.0000  
Use Multiplier & Dilution Factor with ISTDs

Signal 1: VWD1 A, Wavelength=230 nm

| Peak # | RetTime [min] | Type | Width [min] | Area [mAU*s] | Height [mAU] | Area %  |
|--------|---------------|------|-------------|--------------|--------------|---------|
| 1      | 5.720         | MM   | 0.2934      | 9448.71191   | 536.76563    | 93.6085 |
| 2      | 8.466         | MM   | 0.3775      | 645.14722    | 28.48247     | 6.3915  |

Totals : 1.00939e4 565.24809

Results obtained with enhanced integrator!

=====  
\*\*\* End of Report \*\*\*

$^1\text{H}$  NMR spectrum of **2h**

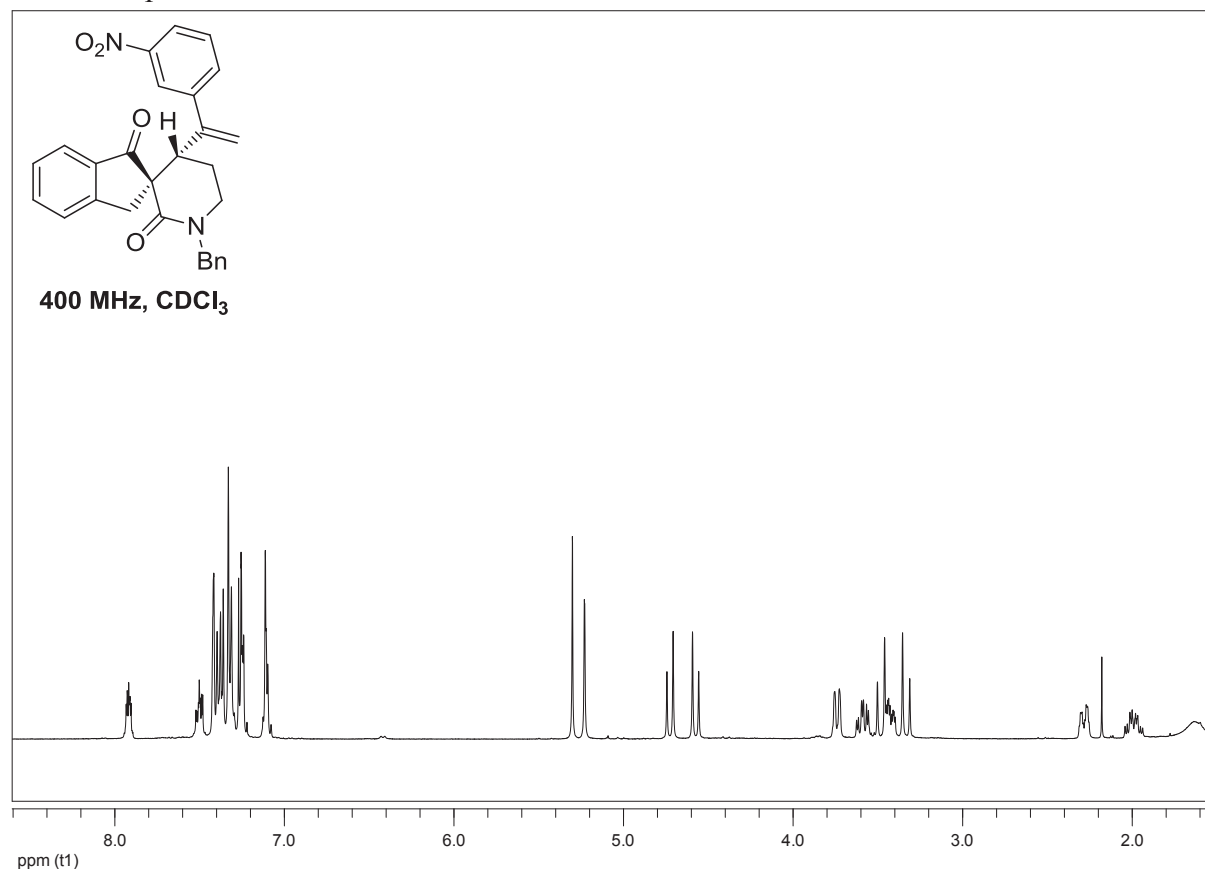

$^{13}\text{C}$  NMR spectrum of **2h**

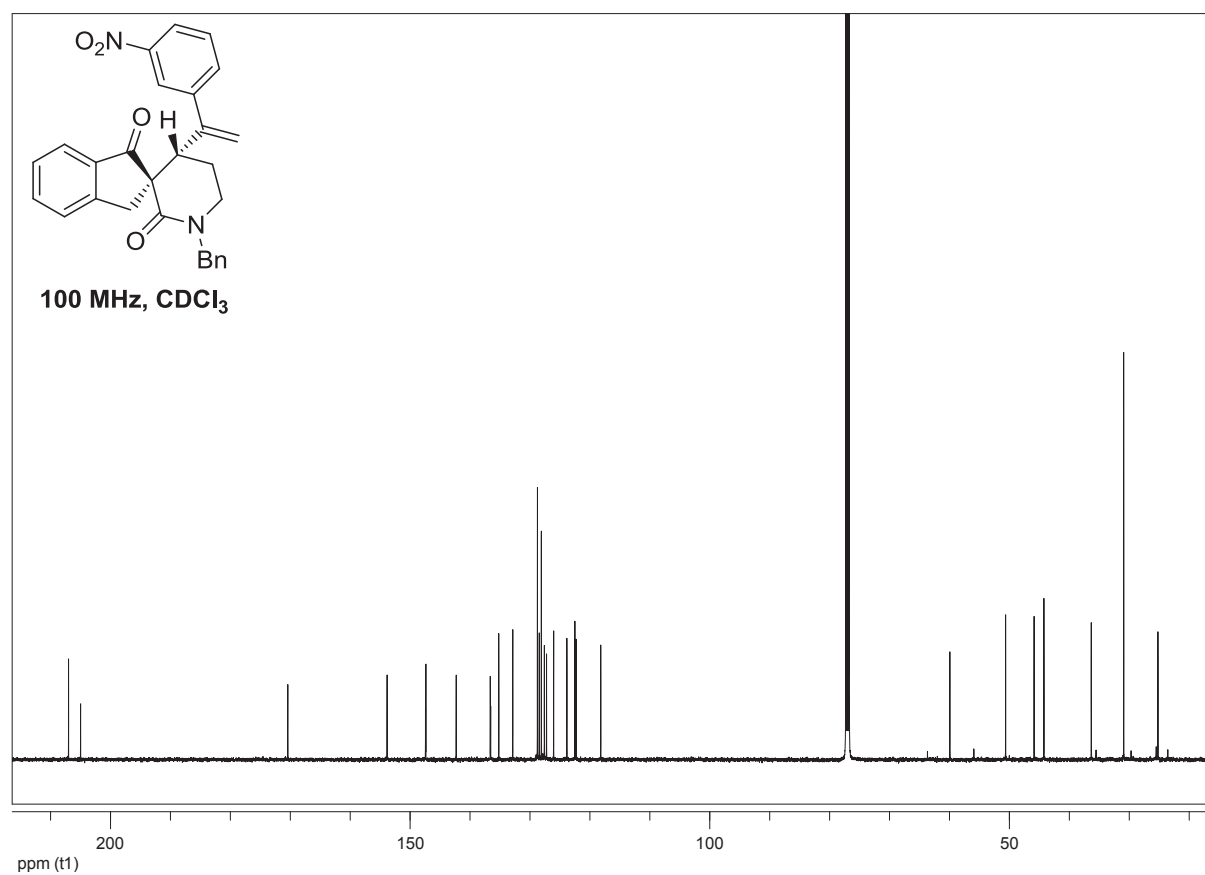

**2h** HPLC: Chiralcel AD; hexane/isopropanol 60:40; 1.0 mL/min

Racemic: Mixture of 2 diastereomers

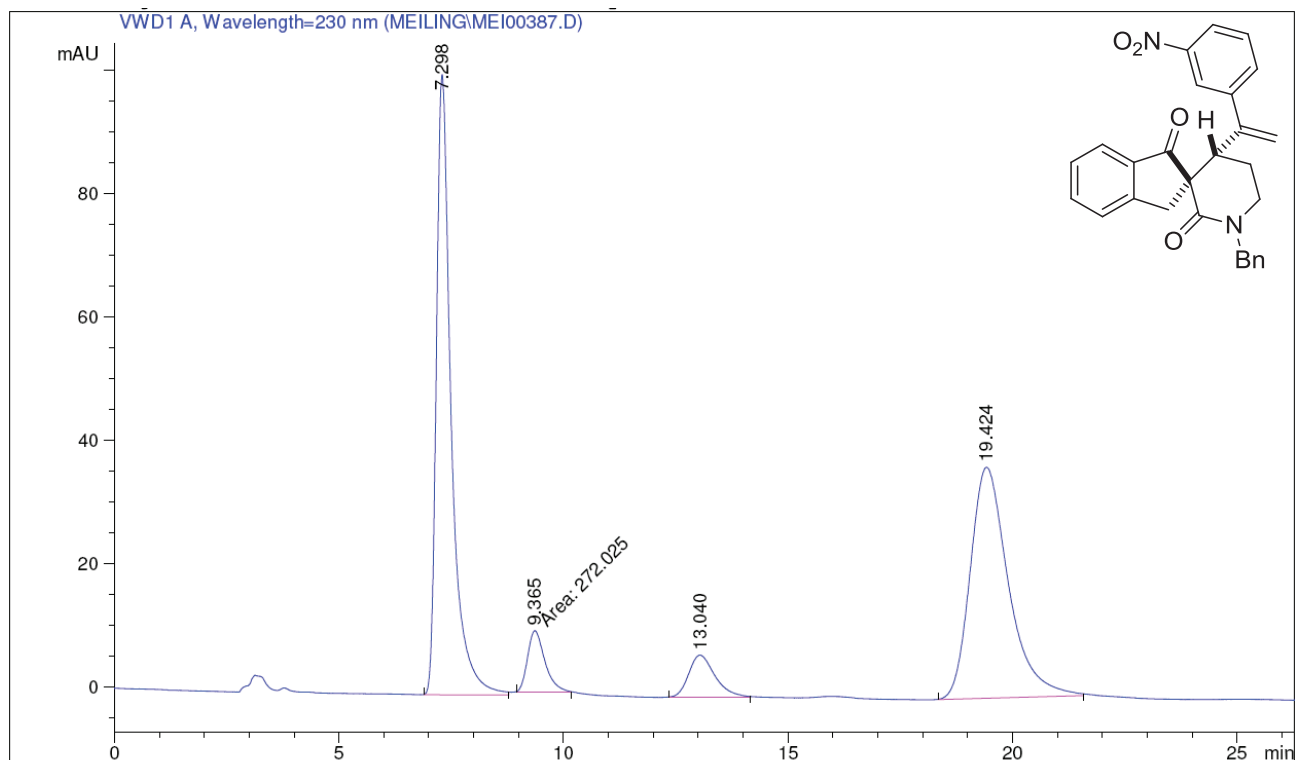

=====  
Area Percent Report  
=====

Sorted By : Signal  
Multiplier : 1.0000  
Dilution : 1.0000  
Use Multiplier & Dilution Factor with ISTDs

Signal 1: VWD1 A, Wavelength=230 nm

| Peak # | RetTime [min] | Type | Width [min] | Area [mAU*s] | Height [mAU] | Area %  |
|--------|---------------|------|-------------|--------------|--------------|---------|
| 1      | 7.298         | BB   | 0.3416      | 2305.01953   | 100.48466    | 45.4246 |
| 2      | 9.365         | MM   | 0.4529      | 272.02536    | 10.01124     | 5.3607  |
| 3      | 13.040        | BB   | 0.6059      | 278.71246    | 6.83253      | 5.4925  |
| 4      | 19.424        | BB   | 0.8876      | 2218.63403   | 37.42518     | 43.7222 |

Totals : 5074.39139 154.75362

Results obtained with enhanced integrator!

=====  
\*\*\* End of Report \*\*\*

**2h** HPLC: Chiralcel AD; hexane/isopropanol 60:40; 1.0 mL/min

Enantioenriched: Major diastereomers

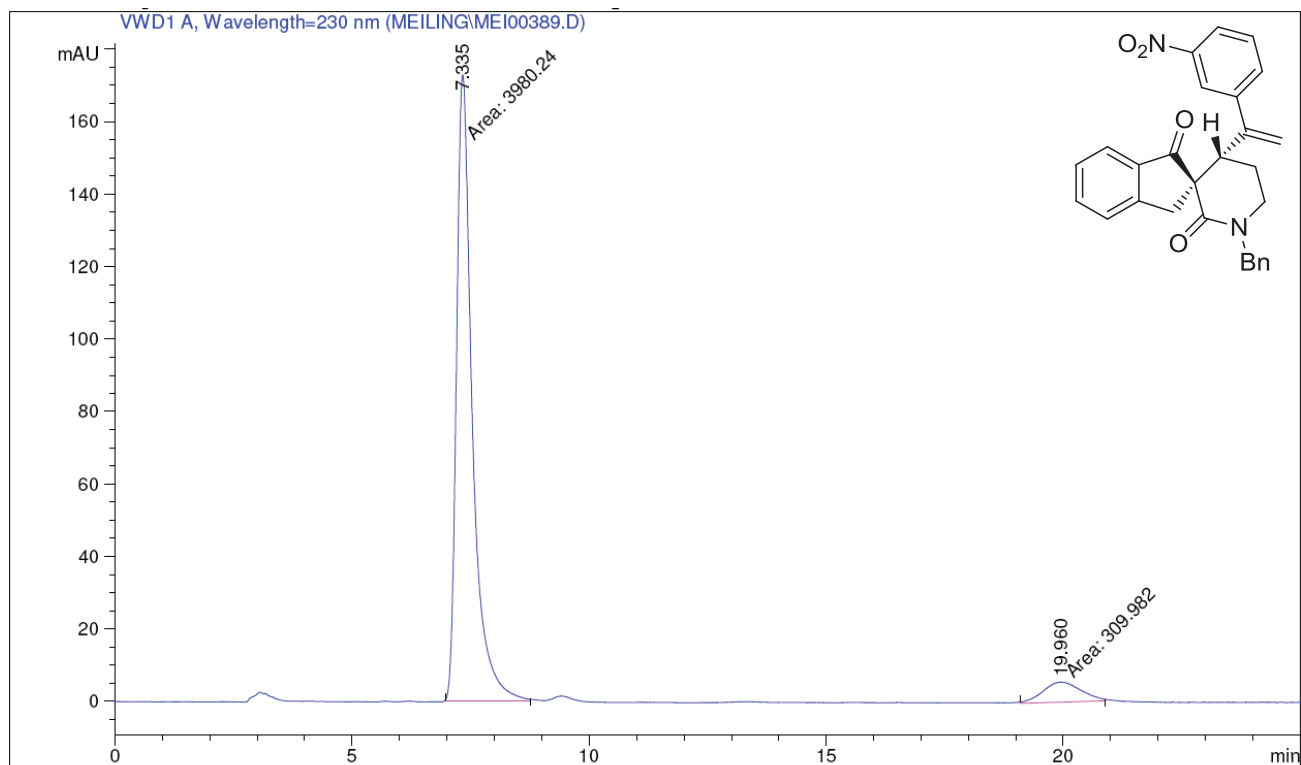

=====  
Area Percent Report  
=====

Sorted By : Signal  
Multiplier : 1.0000  
Dilution : 1.0000  
Use Multiplier & Dilution Factor with ISTDs

Signal 1: VWD1 A, Wavelength=230 nm

| Peak # | RetTime [min] | Type | Width [min] | Area [mAU*s] | Height [mAU] | Area %  |
|--------|---------------|------|-------------|--------------|--------------|---------|
| 1      | 7.335         | MM   | 0.3840      | 3980.24463   | 172.73393    | 92.7747 |
| 2      | 19.960        | MM   | 0.9304      | 309.98196    | 5.55270      | 7.2253  |

Totals : 4290.22659 178.28663

Results obtained with enhanced integrator!

=====  
\*\*\* End of Report \*\*\*

$^1\text{H}$  NMR spectrum of **2i**

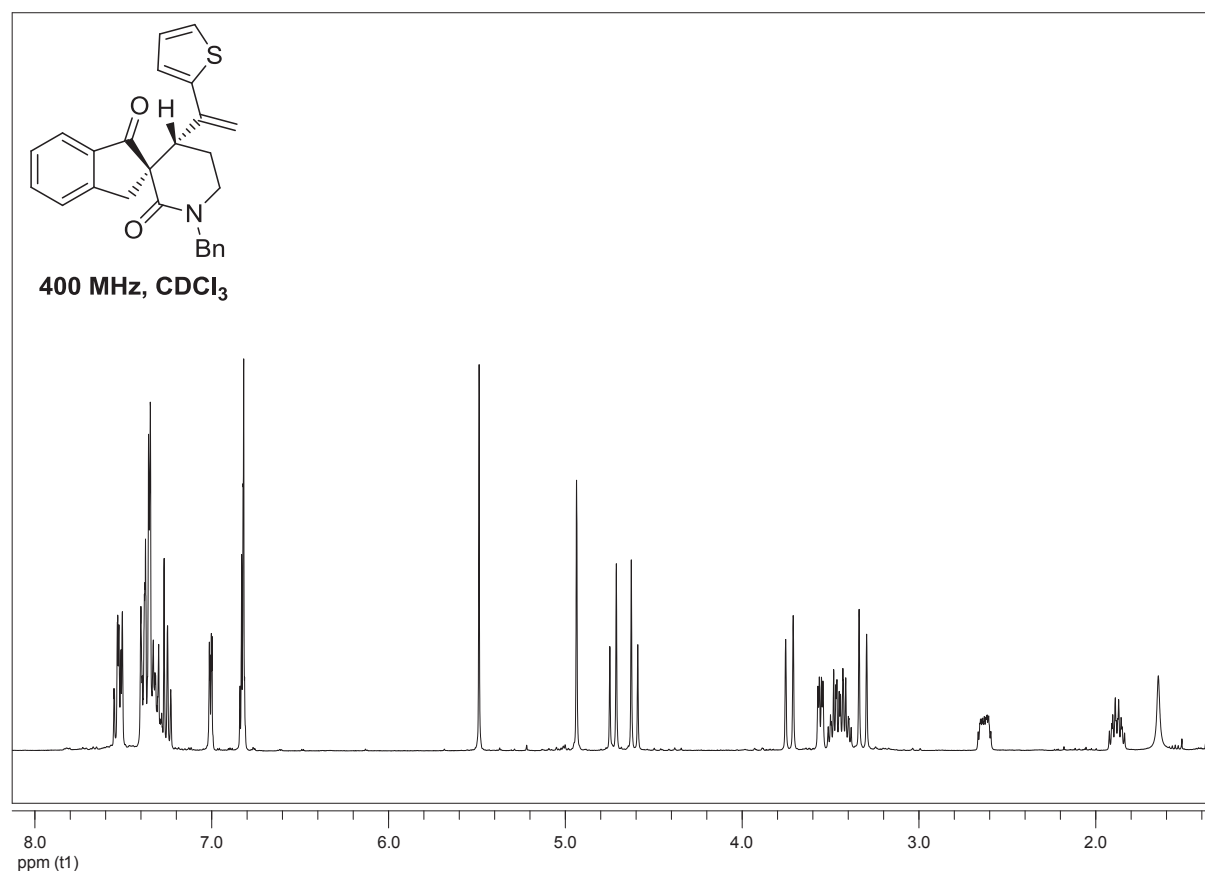

$^{13}\text{C}$  NMR spectrum of **2i**

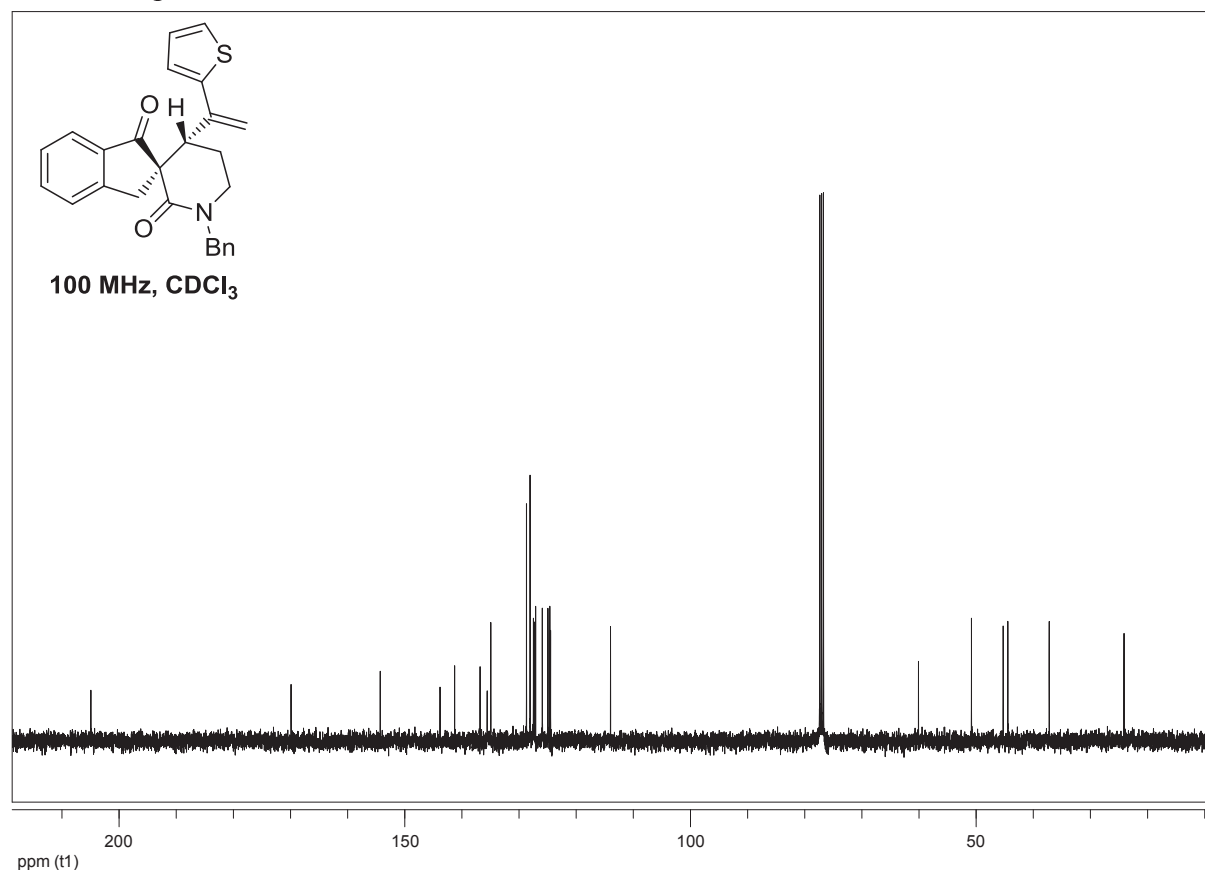

2i HPLC: Chiralcel AD; hexane/isopropanol 60:40; 1.0 mL/min

Racemic

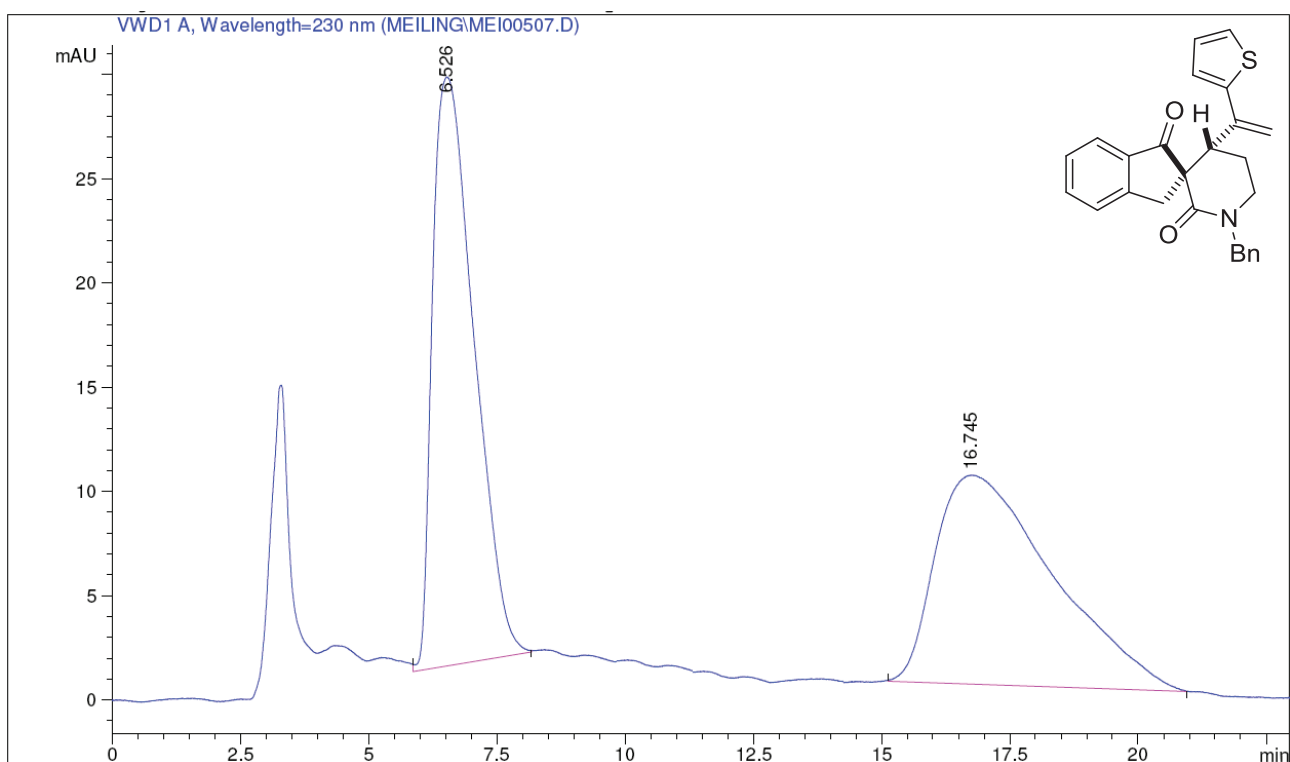

=====  
Area Percent Report  
=====

Sorted By : Signal  
Multiplier : 1.0000  
Dilution : 1.0000  
Use Multiplier & Dilution Factor with ISTDs

Signal 1: VWD1 A, Wavelength=230 nm

| Peak # | RetTime [min] | Type | Width [min] | Area [mAU*s] | Height [mAU] | Area %  |
|--------|---------------|------|-------------|--------------|--------------|---------|
| 1      | 6.526         | BB   | 0.8490      | 1590.69617   | 28.24532     | 49.8209 |
| 2      | 16.745        | BB   | 1.8760      | 1602.13586   | 10.02752     | 50.1791 |

Totals : 3192.83203 38.27284

Results obtained with enhanced integrator!

=====  
\*\*\* End of Report \*\*\*



2i HPLC: Chiralcel AD; hexane/isopropanol 60:40; 1.0 mL/min

Enantioenriched

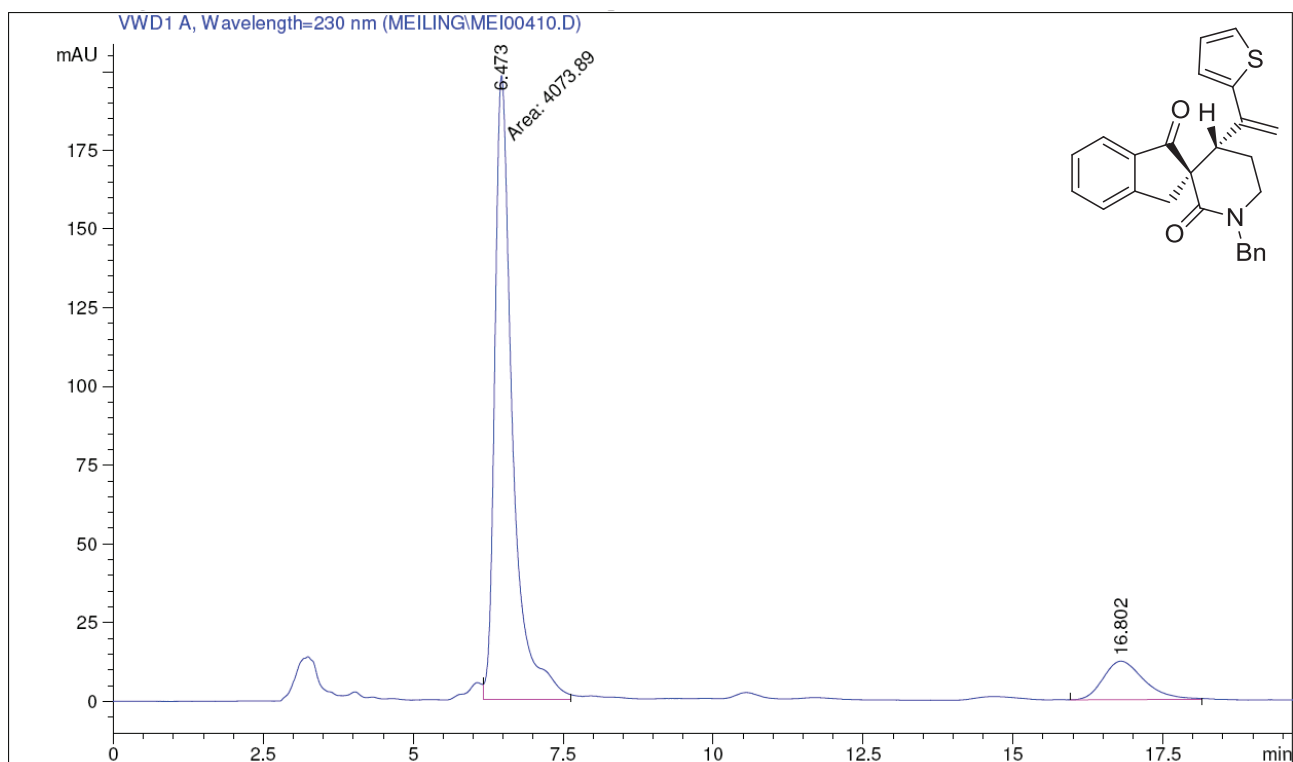

=====  
Area Percent Report  
=====

Sorted By : Signal  
Multiplier : 1.0000  
Dilution : 1.0000  
Use Multiplier & Dilution Factor with ISTDs

Signal 1: VWD1 A, Wavelength=230 nm

| Peak # | RetTime [min] | Type | Width [min] | Area [mAU*s] | Height [mAU] | Area %  |
|--------|---------------|------|-------------|--------------|--------------|---------|
| 1      | 6.473         | MM   | 0.3428      | 4073.88989   | 198.09509    | 87.5908 |
| 2      | 16.802        | BB   | 0.7108      | 577.15833    | 12.18167     | 12.4092 |

Totals : 4651.04822 210.27676

Results obtained with enhanced integrator!

=====  
\*\*\* End of Report \*\*\*

$^1\text{H}$  NMR spectra of **2j**

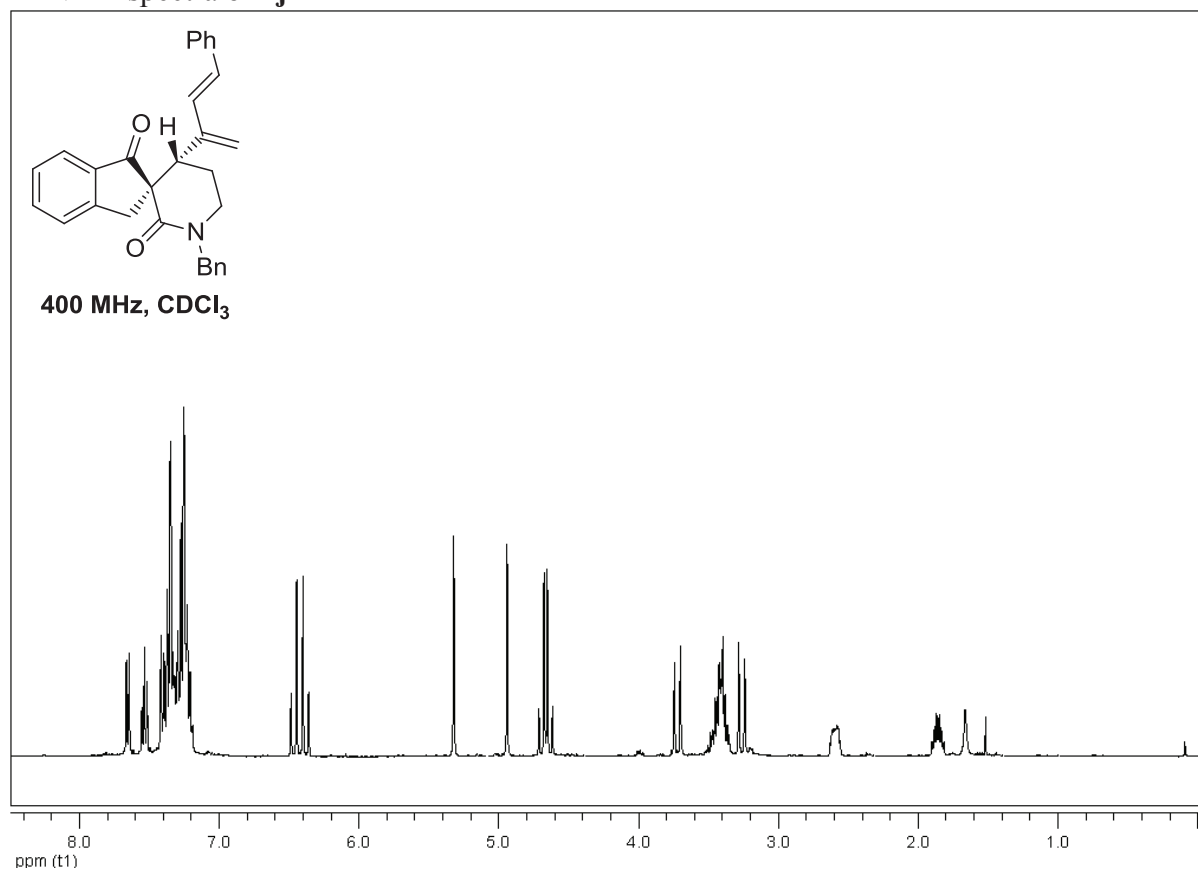

$^{13}\text{C}$  NMR spectra of **2j**

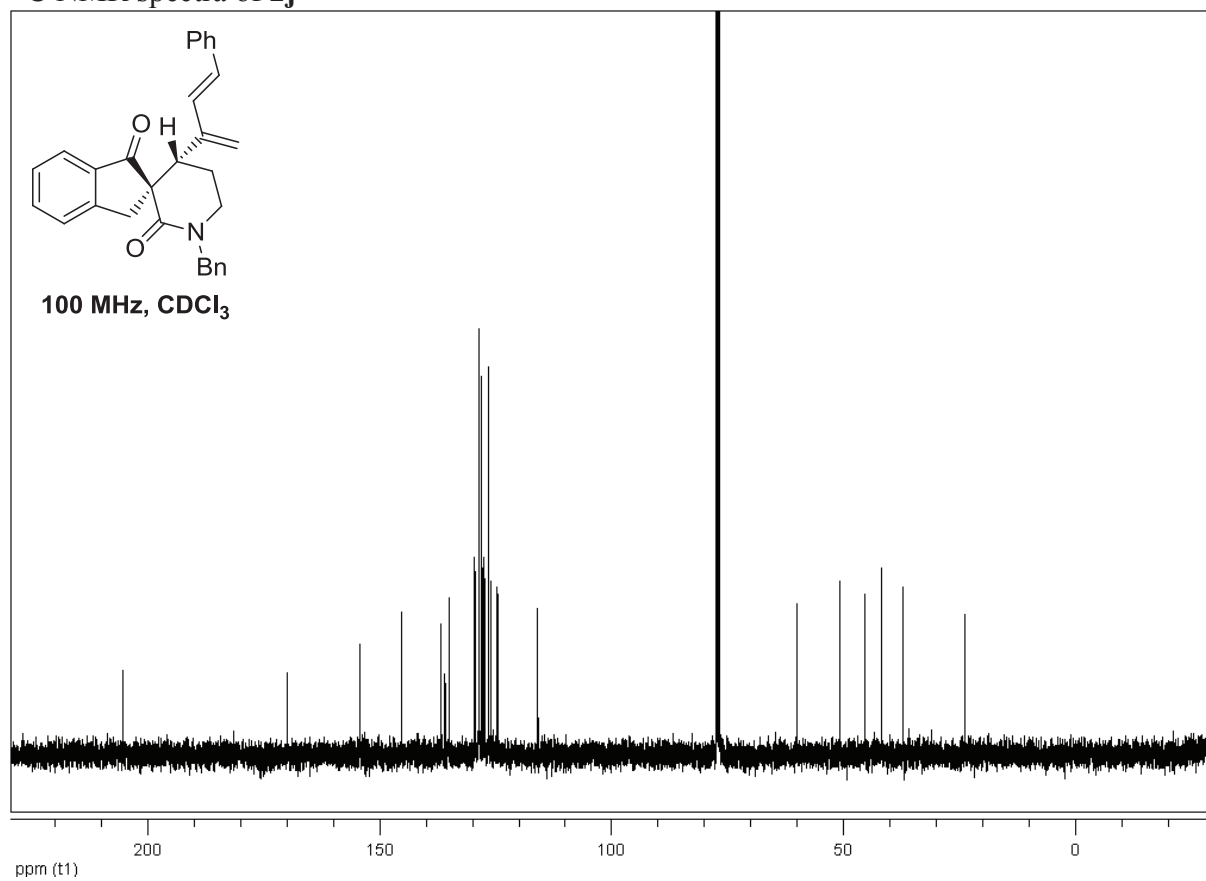

2j HPLC: Chiralcel AD; hexane/isopropanol 60:40; 1.0 mL/min

Racemic

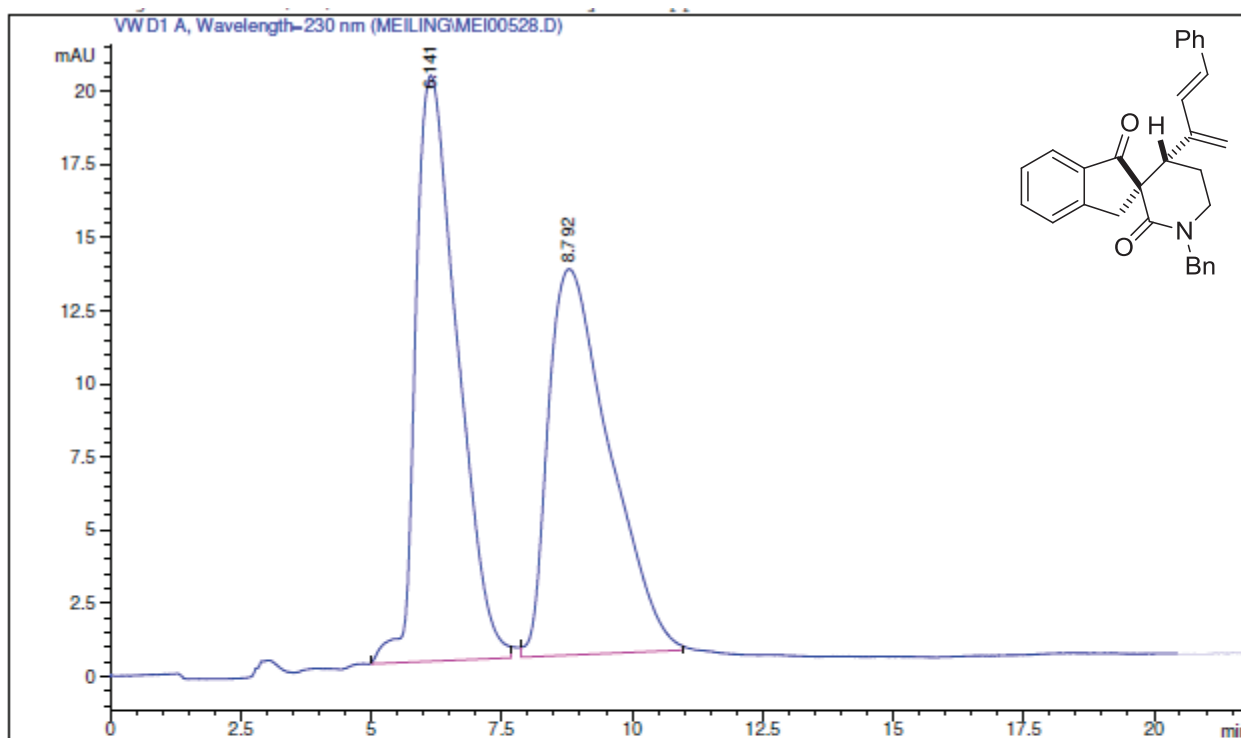

-----  
Area Percent Report  
-----

Sorted By : Signal  
Multiplier : 1.0000  
Dilution : 1.0000  
Use Multiplier & Dilution Factor with ISTDs

Signal 1: VWD1 A, Wavelength=230 nm

| Peak # | RetTime [min] | Type | Width [min] | Area [mAU*s] | Height [mAU] | Area %  |
|--------|---------------|------|-------------|--------------|--------------|---------|
| 1      | 6.141         | BB   | 0.8308      | 1113.48547   | 20.02211     | 50.8738 |
| 2      | 8.792         | BB   | 1.1848      | 1075.23462   | 13.19364     | 49.1262 |

Totals : 2188.72009 33.21574

Results obtained with enhanced integrator!

-----  
\*\*\* End of Report \*\*\*

2j HPLC: Chiralcel AD; hexane/isopropanol 60:40; 1.0 mL/min

Enantioenriched

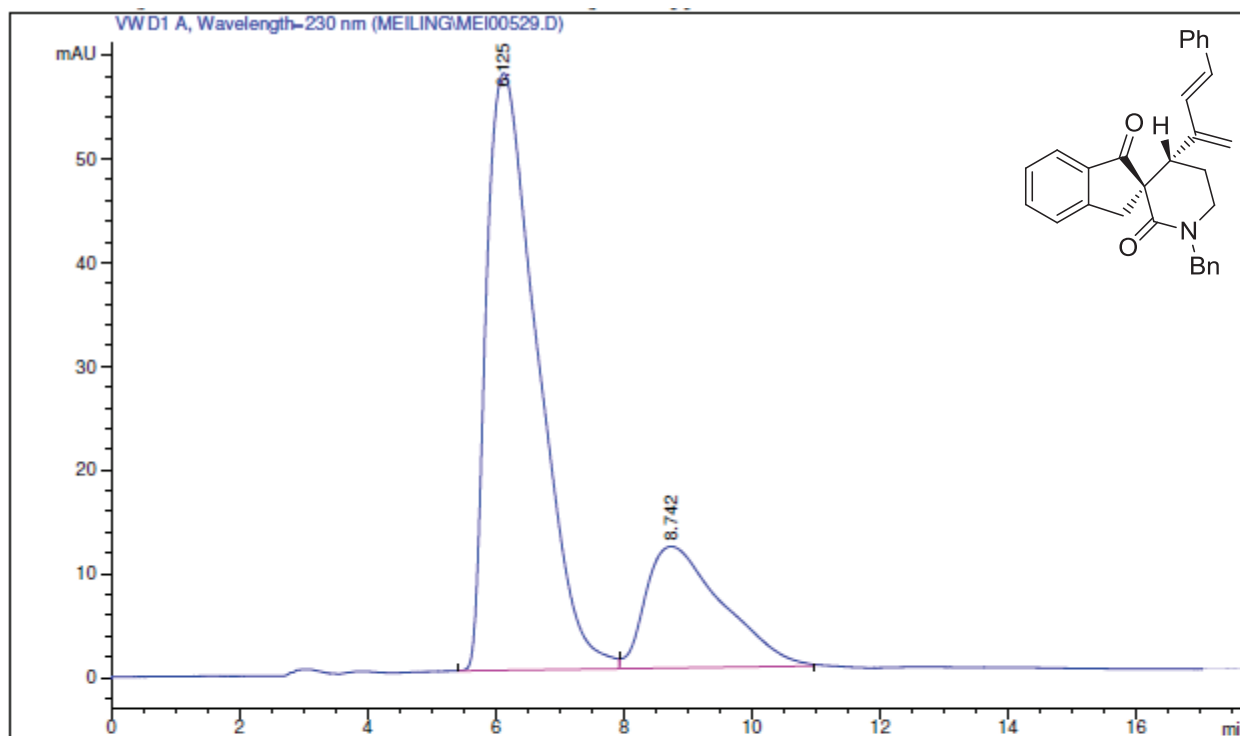

-----  
Area Percent Report  
-----

Sorted By : Signal  
Multiplier : 1.0000  
Dilution : 1.0000  
Use Multiplier & Dilution Factor with ISTDs

Signal 1: VWD1 A, Wavelength-230 nm

| Peak # | RetTime [min] | Type | Width [min] | Area [mAU*s] | Height [mAU] | Area %  |
|--------|---------------|------|-------------|--------------|--------------|---------|
| 1      | 6.125         | BV   | 0.8209      | 3181.31592   | 57.54797     | 76.5919 |
| 2      | 8.742         | VB   | 1.1703      | 972.27789    | 11.71471     | 23.4081 |

Totals : 4153.59381 69.26268

Results obtained with enhanced integrator!

-----  
\*\*\* End of Report \*\*\*  
-----

$^1\text{H}$  NMR spectra of **2k**

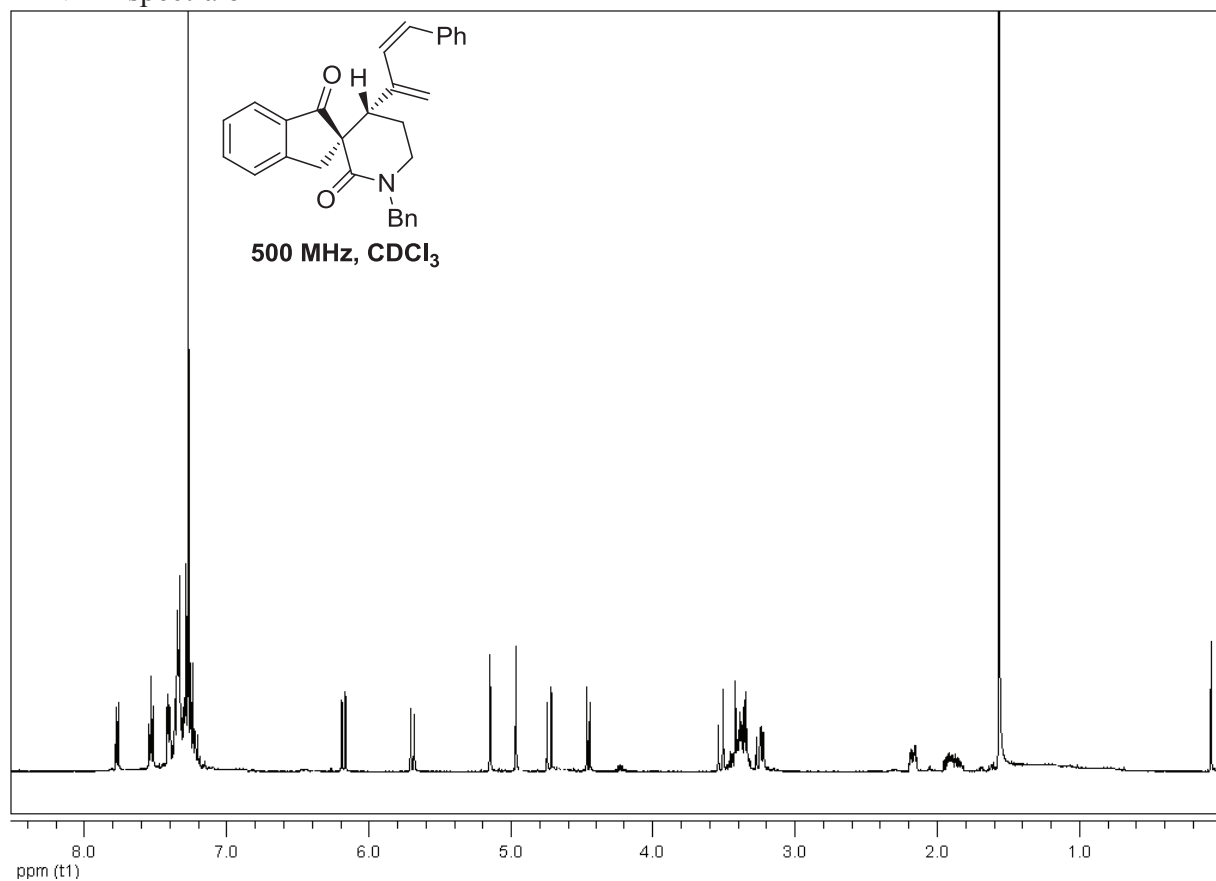

$^{13}\text{C}$  NMR spectra of **2k**

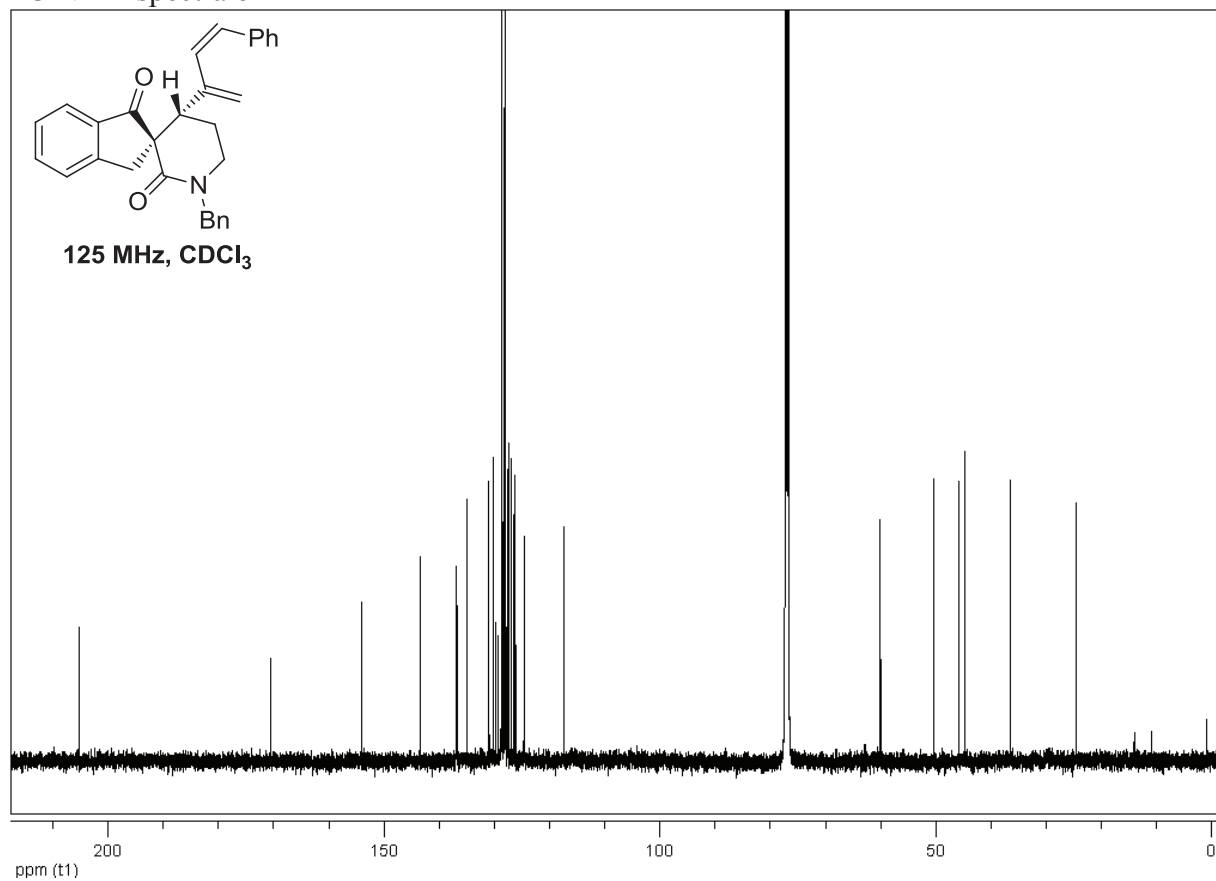

2k HPLC: Chiralcel AD; hexane/isopropanol 60:40; 1.0 mL/min

Racemic

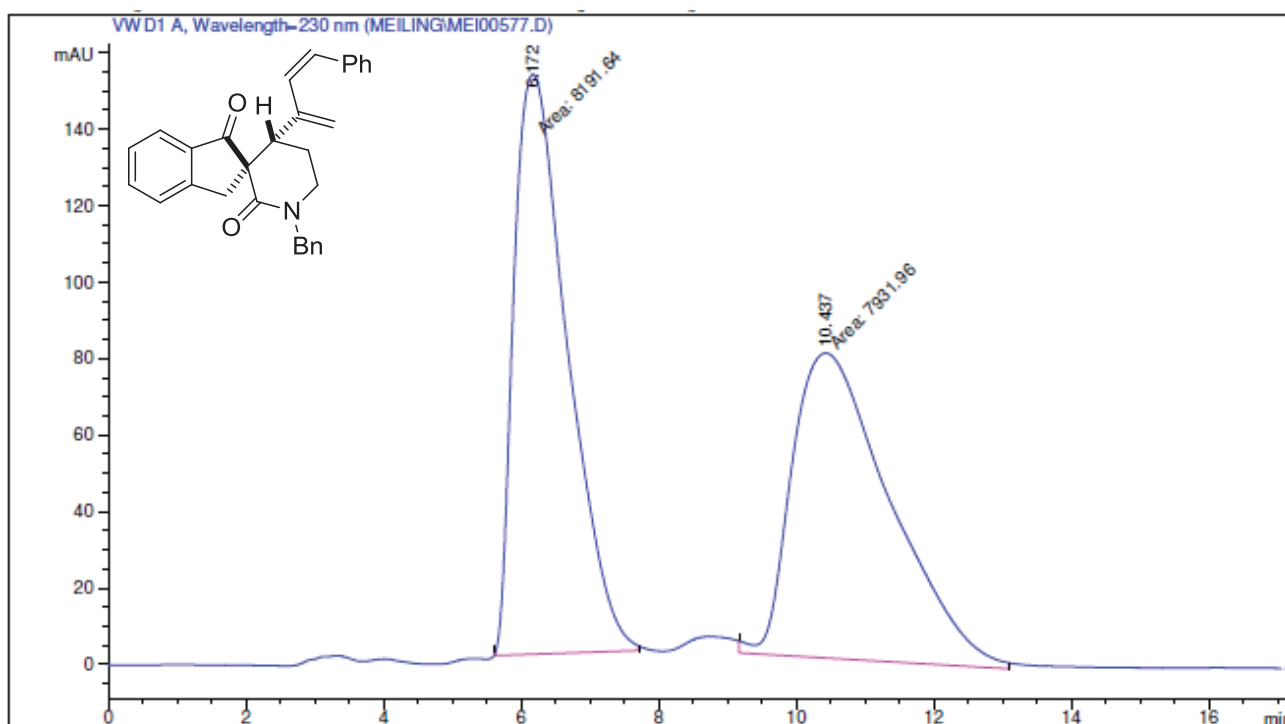

Area Percent Report

Sorted By : Signal  
Multiplier : 1.0000  
Dilution : 1.0000  
Use Multiplier & Dilution Factor with ISTDs

Signal 1: VWD1 A, Wavelength-230 nm

| Peak # | RetTime [min] | Type | Width [min] | Area [mAU*s] | Height [mAU] | Area %  |
|--------|---------------|------|-------------|--------------|--------------|---------|
| 1      | 6.172         | MM   | 0.9001      | 8191.64355   | 151.67474    | 50.8053 |
| 2      | 10.437        | MM   | 1.6574      | 7931.95605   | 79.76170     | 49.1947 |

Totals : 1.61236e4 231.43644

Results obtained with enhanced integrator!

\*\*\* End of Report \*\*\*

**2k** HPLC: Chiralcel AD; hexane/isopropanol 60:40; 1.0 mL/min

Enantioenriched

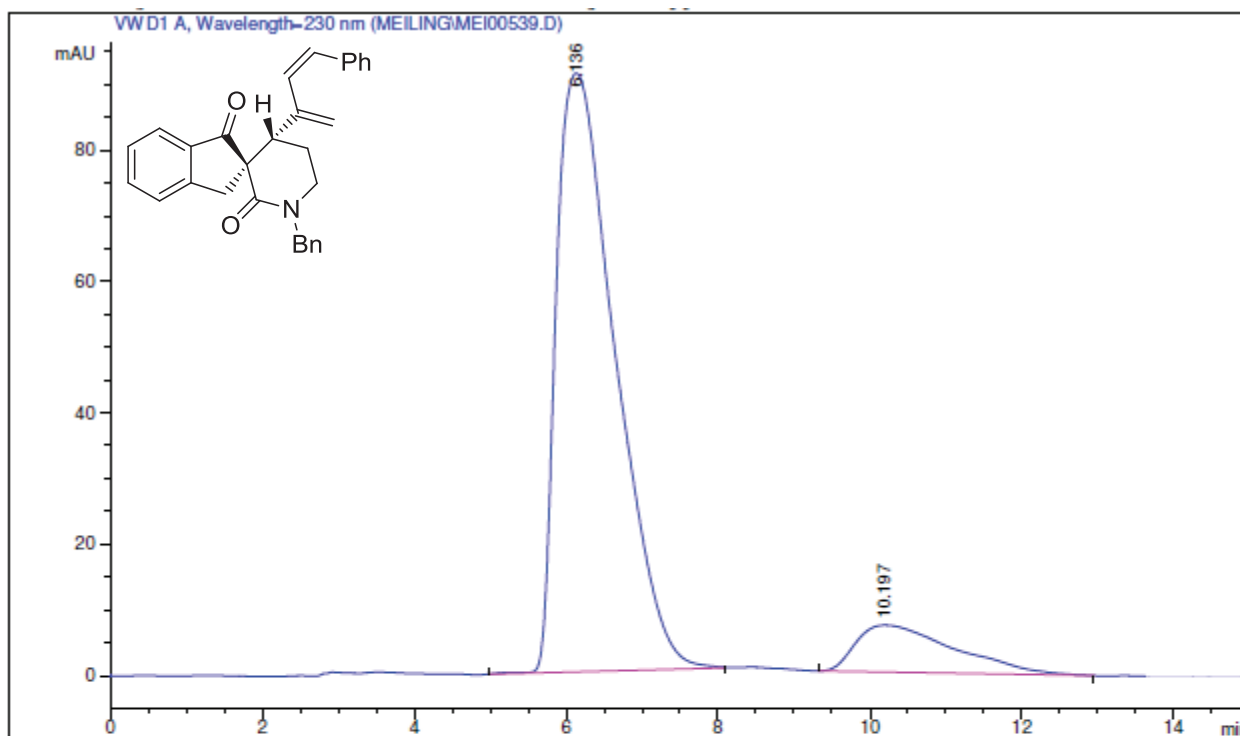

-----  
Area Percent Report  
-----

Sorted By : Signal  
Multiplier : 1.0000  
Dilution : 1.0000  
Use Multiplier & Dilution Factor with ISTDs

Signal 1: VWD1 A, Wavelength-230 nm

| Peak # | RetTime [min] | Type | Width [min] | Area [mAU*s] | Height [mAU] | Area %  |
|--------|---------------|------|-------------|--------------|--------------|---------|
| 1      | 6.136         | PB   | 0.8137      | 4887.21973   | 91.12161     | 88.3431 |
| 2      | 10.197        | PP   | 1.0749      | 644.87280    | 7.15886      | 11.6569 |

Totals : 5532.09253 98.28047

Results obtained with enhanced integrator!

-----  
\*\*\* End of Report \*\*\*

$^1\text{H}$  NMR spectra of **21**

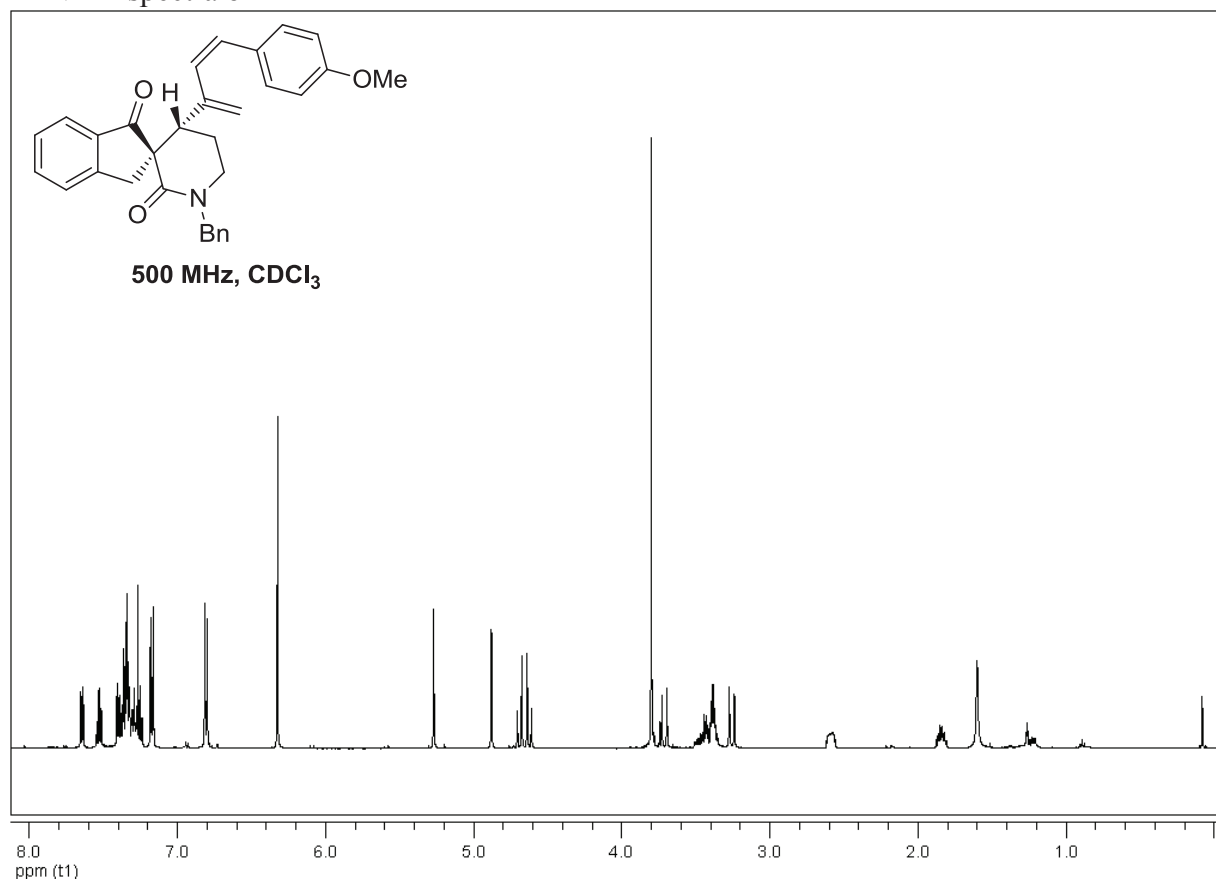

$^{13}\text{C}$  NMR spectra of **21**

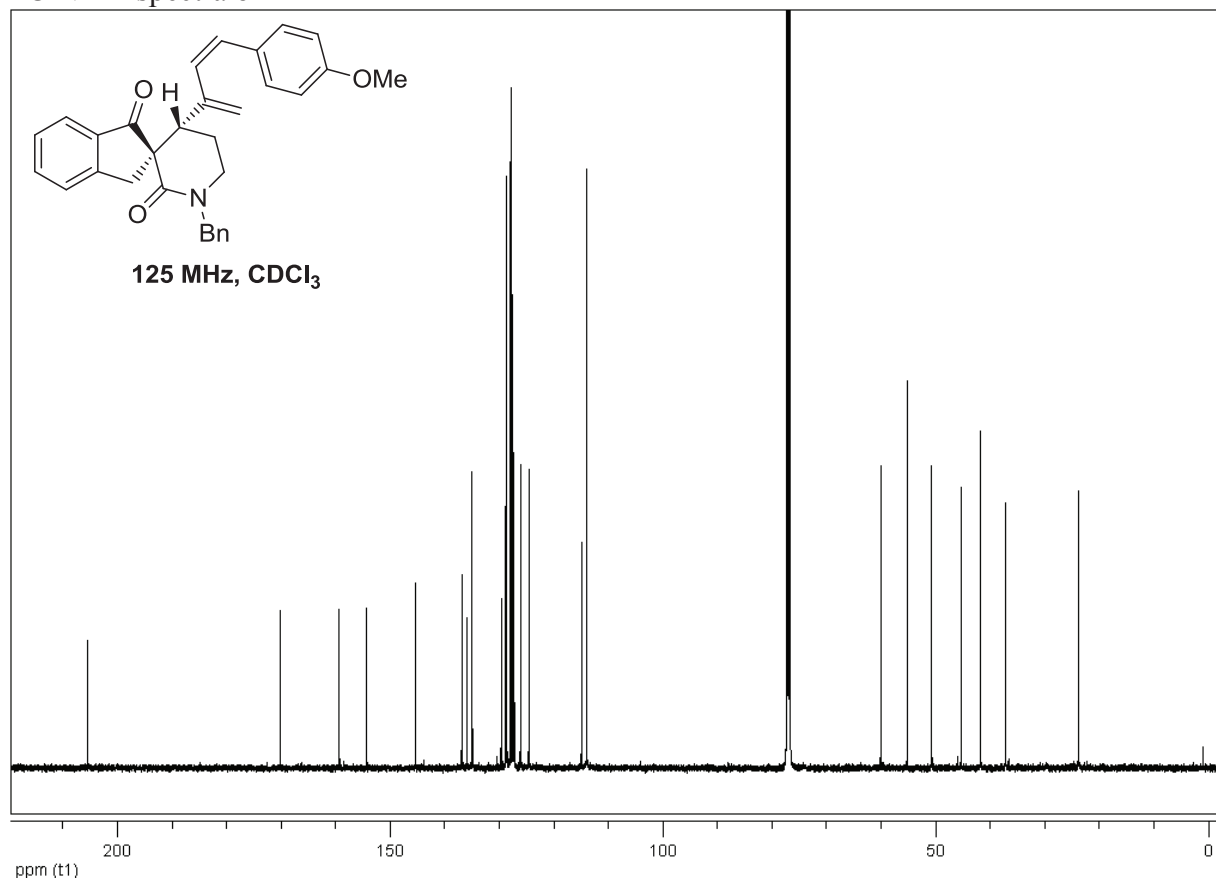



21 HPLC: Chiralcel AD; hexane/isopropanol 60:40; 1.0 mL/min

Racemic

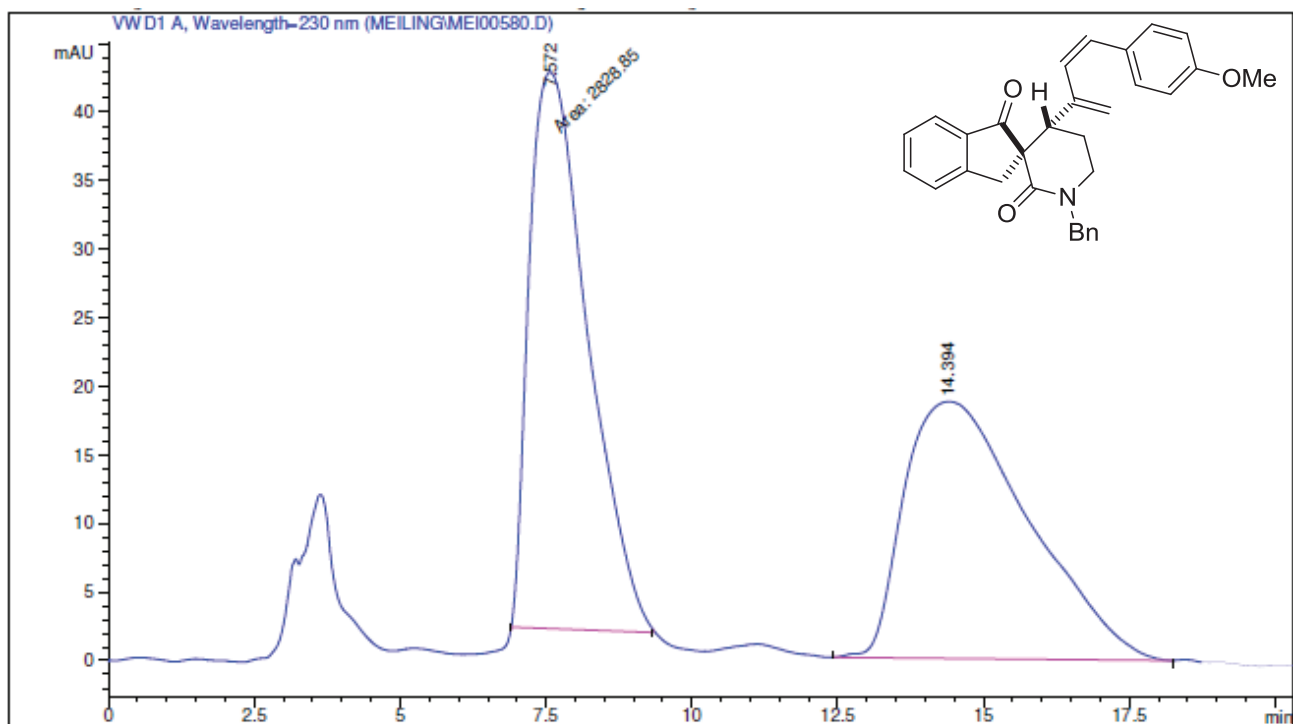

Area Percent Report

Sorted By : Signal  
Multiplier : 1.0000  
Dilution : 1.0000  
Use Multiplier & Dilution Factor with ISTDs

Signal 1: VWD1 A, Wavelength-230 nm

| Peak # | RetTime [min] | Type | Width [min] | Area [mAU*s] | Height [mAU] | Area %  |
|--------|---------------|------|-------------|--------------|--------------|---------|
| 1      | 7.572         | MM   | 1.1623      | 2828.85156   | 40.56512     | 50.4575 |
| 2      | 14.394        | PP   | 1.7396      | 2777.55273   | 18.73517     | 49.5425 |

Totals : 5606.40430 59.30029

Results obtained with enhanced integrator!

\*\*\* End of Report \*\*\*

21 HPLC: Chiralcel AD; hexane/isopropanol 60:40; 1.0 mL/min

Enantioenriched

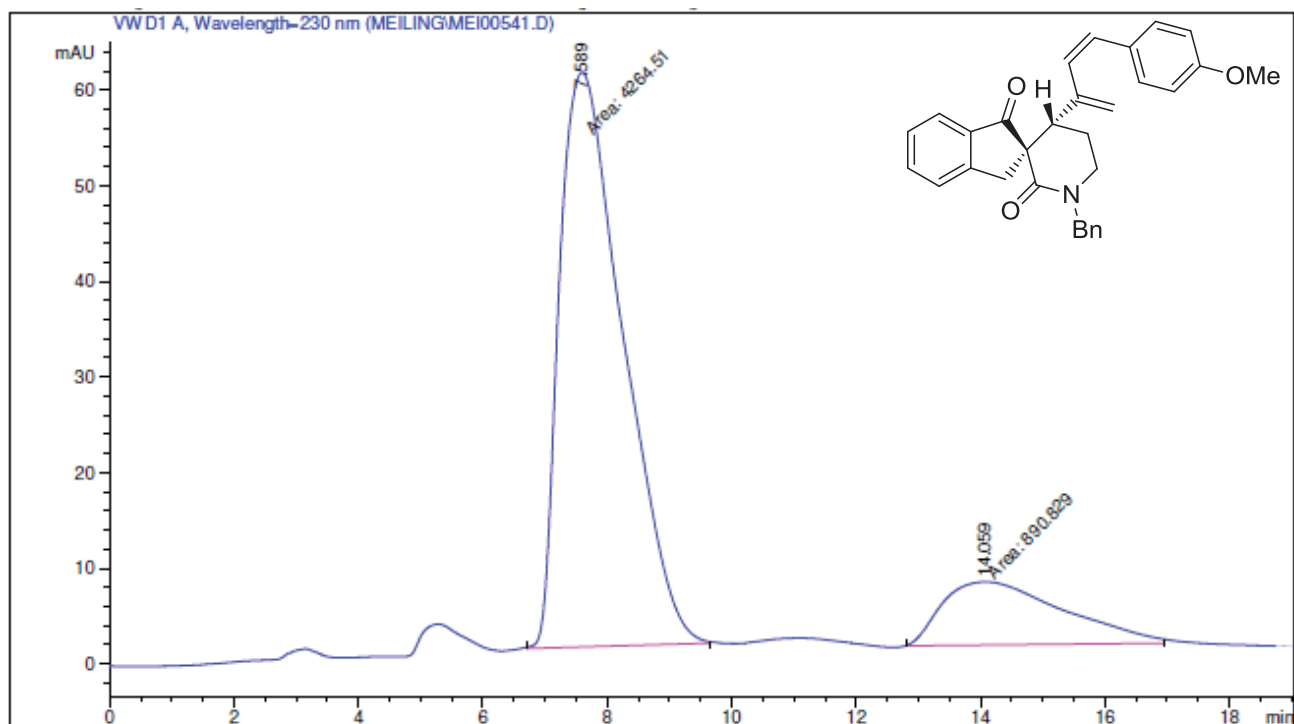

Area Percent Report

Sorted By : Signal  
Multiplier : 1.0000  
Dilution : 1.0000  
Use Multiplier & Dilution Factor with ISTDs

Signal 1: VWD1 A, Wavelength-230 nm

| Peak # | RetTime [min] | Type | Width [min] | Area [mAU*s] | Height [mAU] | Area %  |
|--------|---------------|------|-------------|--------------|--------------|---------|
| 1      | 7.589         | MM   | 1.1834      | 4264.51367   | 60.05998     | 82.7203 |
| 2      | 14.059        | MM   | 2.2504      | 890.82867    | 6.59764      | 17.2797 |

Totals : 5155.34235 66.65762

Results obtained with enhanced integrator!

\*\*\* End of Report \*\*\*

$^1\text{H}$  NMR spectra of **2m**

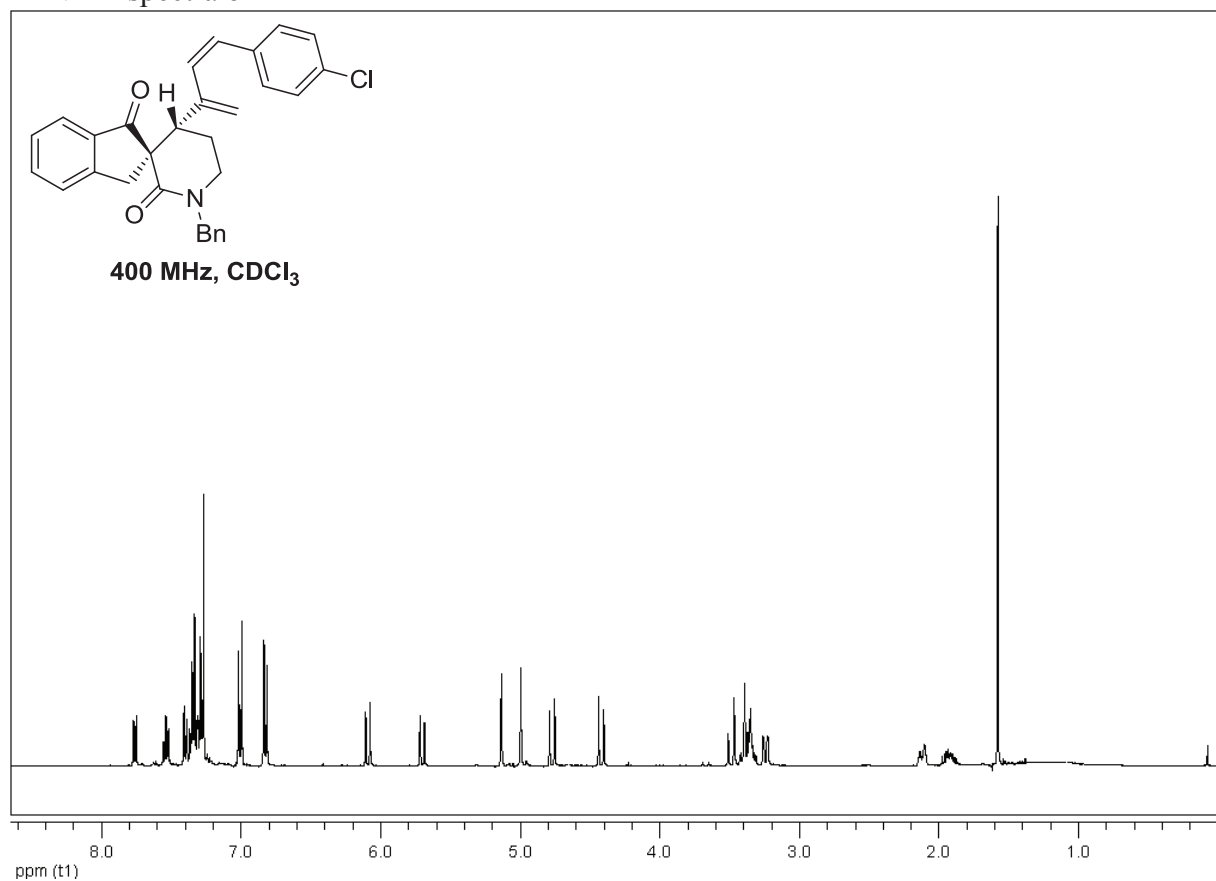

$^{13}\text{C}$  NMR spectra of **2m**

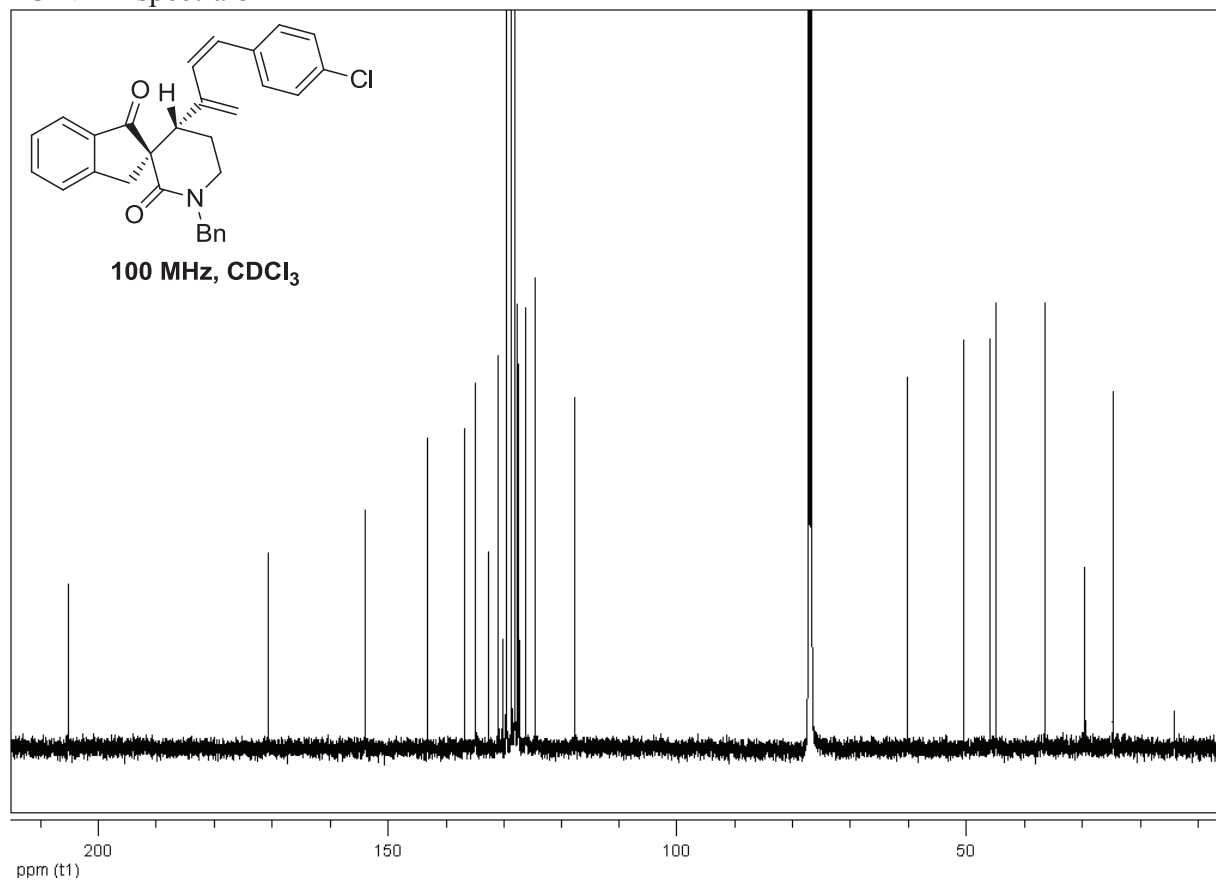

**2m** HPLC: Chiralcel AD; hexane/isopropanol 70:30; 1.0 mL/min

Racemic

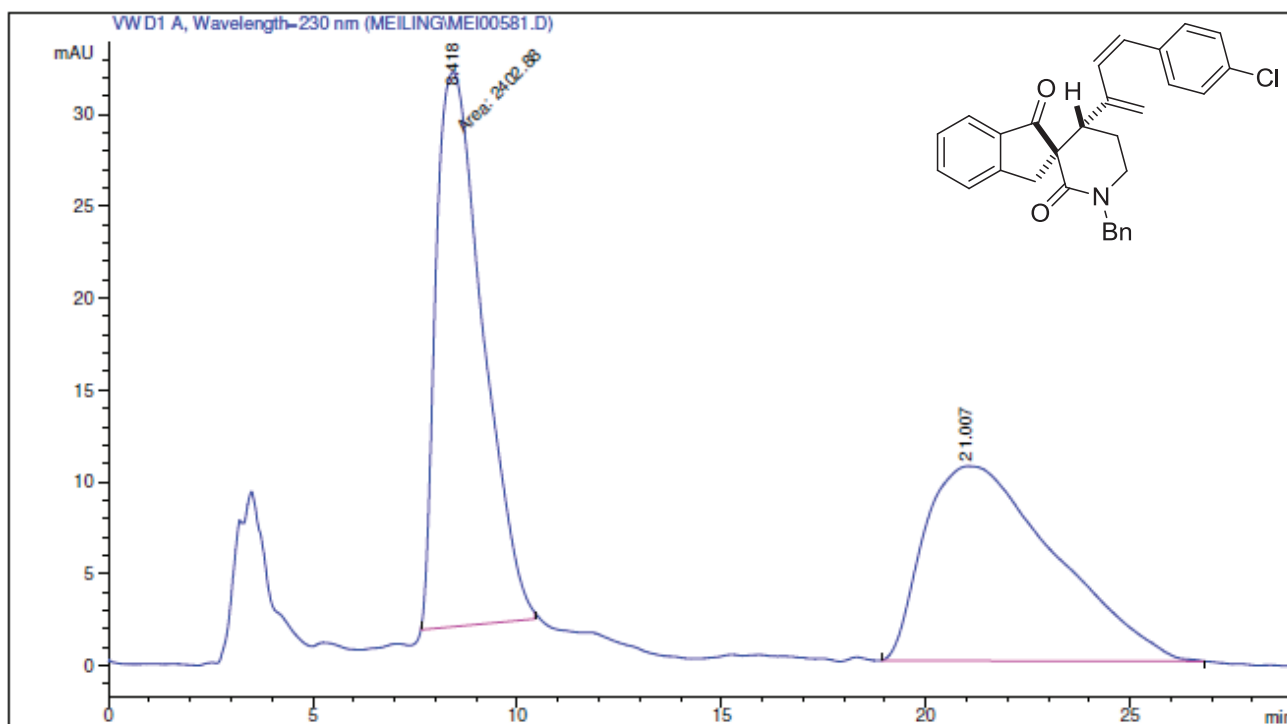

-----  
Area Percent Report  
-----

Sorted By : Signal  
Multiplier : 1.0000  
Dilution : 1.0000  
Use Multiplier & Dilution Factor with ISTDs

Signal 1: VWD1 A, Wavelength-230 nm

| Peak # | RetTime [min] | Type | Width [min] | Area [mAU*s] | Height [mAU] | Area %  |
|--------|---------------|------|-------------|--------------|--------------|---------|
| 1      | 8.418         | MM   | 1.3267      | 2402.87817   | 30.18527     | 50.4327 |
| 2      | 21.007        | BB   | 2.6005      | 2361.64941   | 10.60714     | 49.5673 |

Totals : 4764.52759 40.79241

Results obtained with enhanced integrator!

-----  
\*\*\* End of Report \*\*\*

**2m** HPLC: Chiralcel AD; hexane/isopropanol 70:30; 1.0 mL/min

Enantioenriched

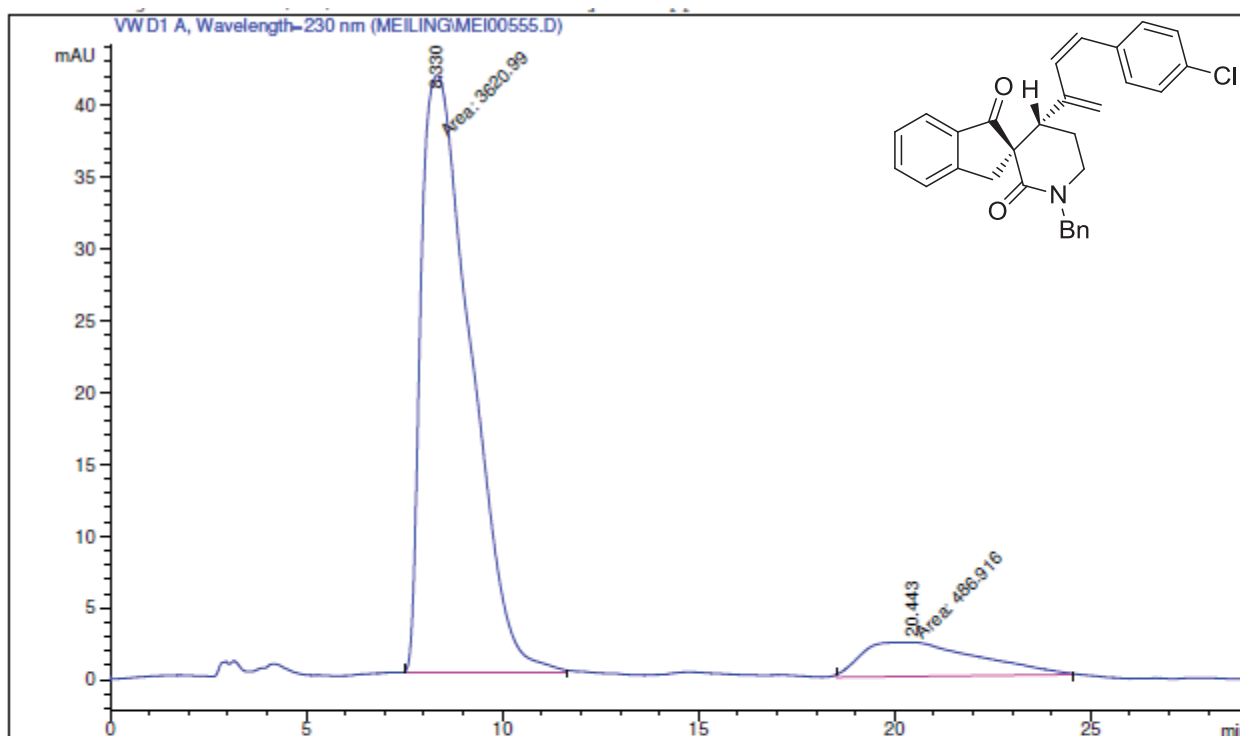

-----  
Area Percent Report  
-----

Sorted By : Signal  
Multiplier : 1.0000  
Dilution : 1.0000  
Use Multiplier & Dilution Factor with ISTDs

Signal 1: VWD1 A, Wavelength=230 nm

| Peak # | RetTime [min] | Type | Width [min] | Area [mAU*s] | Height [mAU] | Area %  |
|--------|---------------|------|-------------|--------------|--------------|---------|
| 1      | 8.330         | MM   | 1.4546      | 3620.98975   | 41.48933     | 88.1469 |
| 2      | 20.443        | MM   | 3.4284      | 486.91556    | 2.36707      | 11.8531 |

Totals : 4107.90530 43.85640

Results obtained with enhanced integrator!

-----  
\*\*\* End of Report \*\*\*

$^1\text{H}$  NMR spectra of **2n**

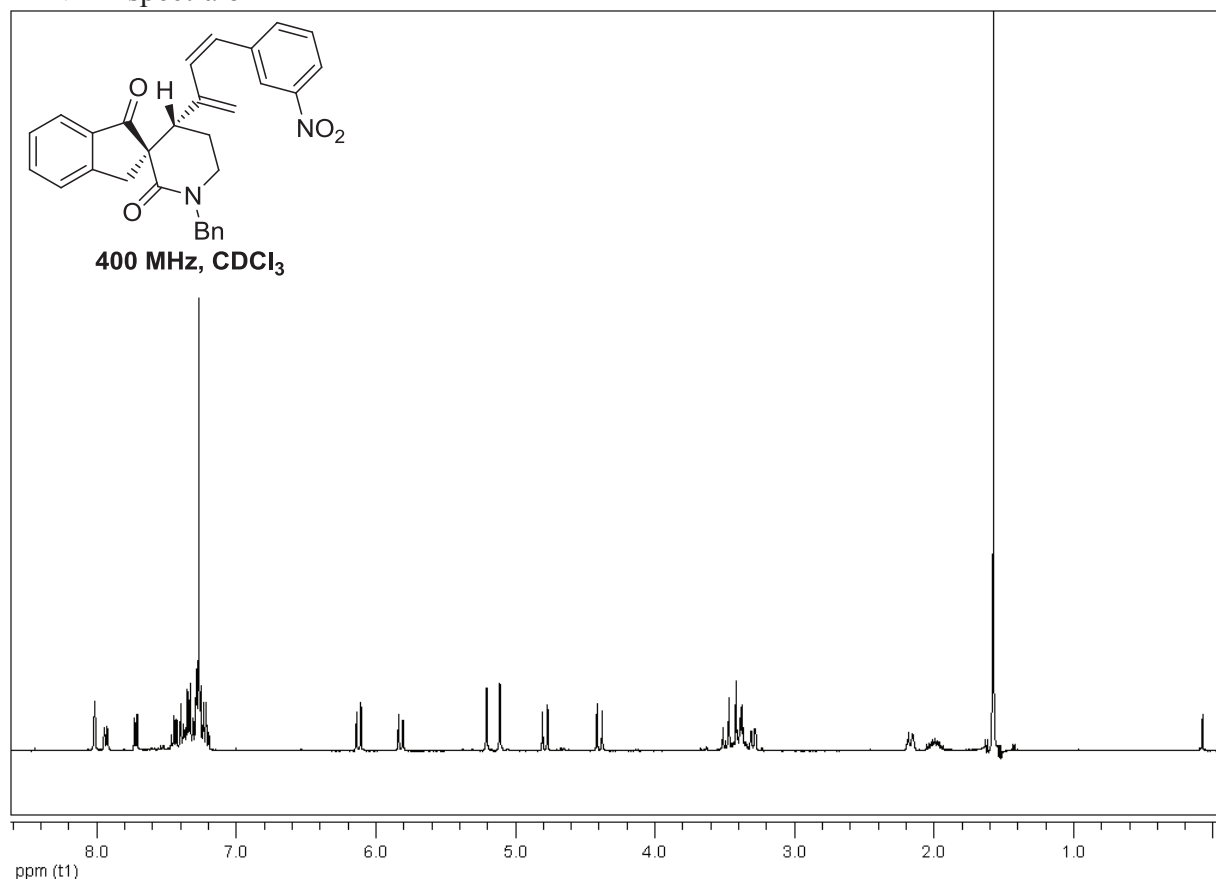

$^{13}\text{C}$  NMR spectra of **2n**

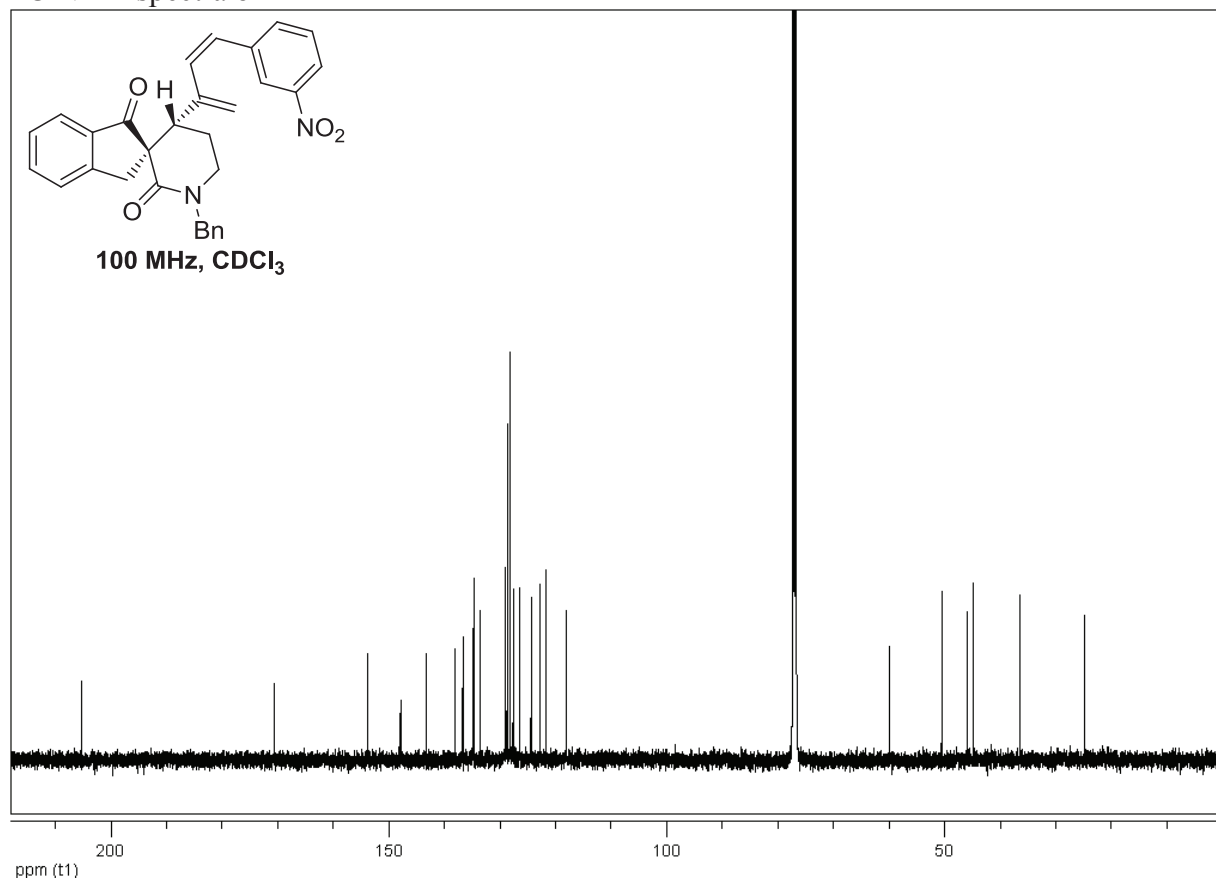

**2n** HPLC: Chiralcel AD; hexane/isopropanol 60:40; 1.0 mL/min

Racemic

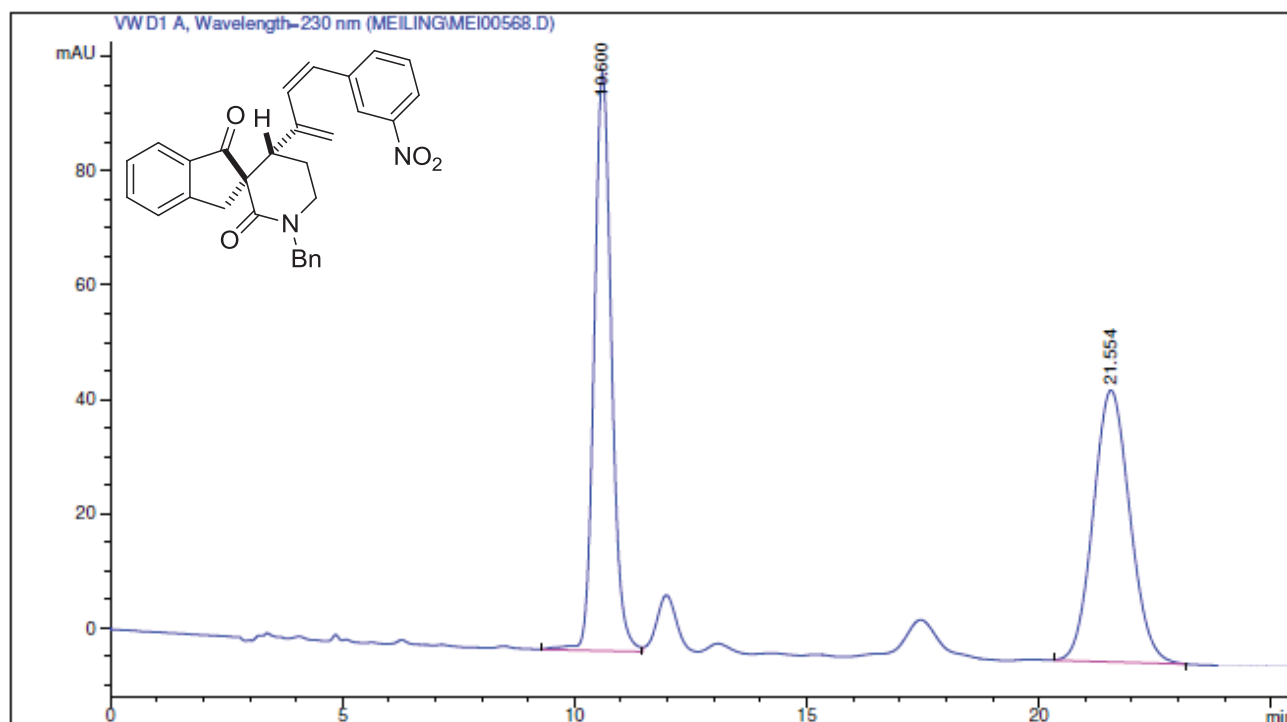

-----  
Area Percent Report  
-----

Sorted By : Signal  
Multiplier : 1.0000  
Dilution : 1.0000  
Use Multiplier & Dilution Factor with ISTDs

Signal 1: VWD1 A, Wavelength-230 nm

| Peak # | RetTime [min] | Type | Width [min] | Area [mAU*s] | Height [mAU] | Area %  |
|--------|---------------|------|-------------|--------------|--------------|---------|
| 1      | 10.600        | BB   | 0.3945      | 2634.79565   | 101.28857    | 50.2120 |
| 2      | 21.554        | BB   | 0.6805      | 2612.54712   | 47.58736     | 49.7880 |

Totals : 5247.34277 148.87593

Results obtained with enhanced integrator!

-----  
\*\*\* End of Report \*\*\*

**2n** HPLC: Chiralcel AD; hexane/isopropanol 60:40; 1.0 mL/min

Enantioenriched

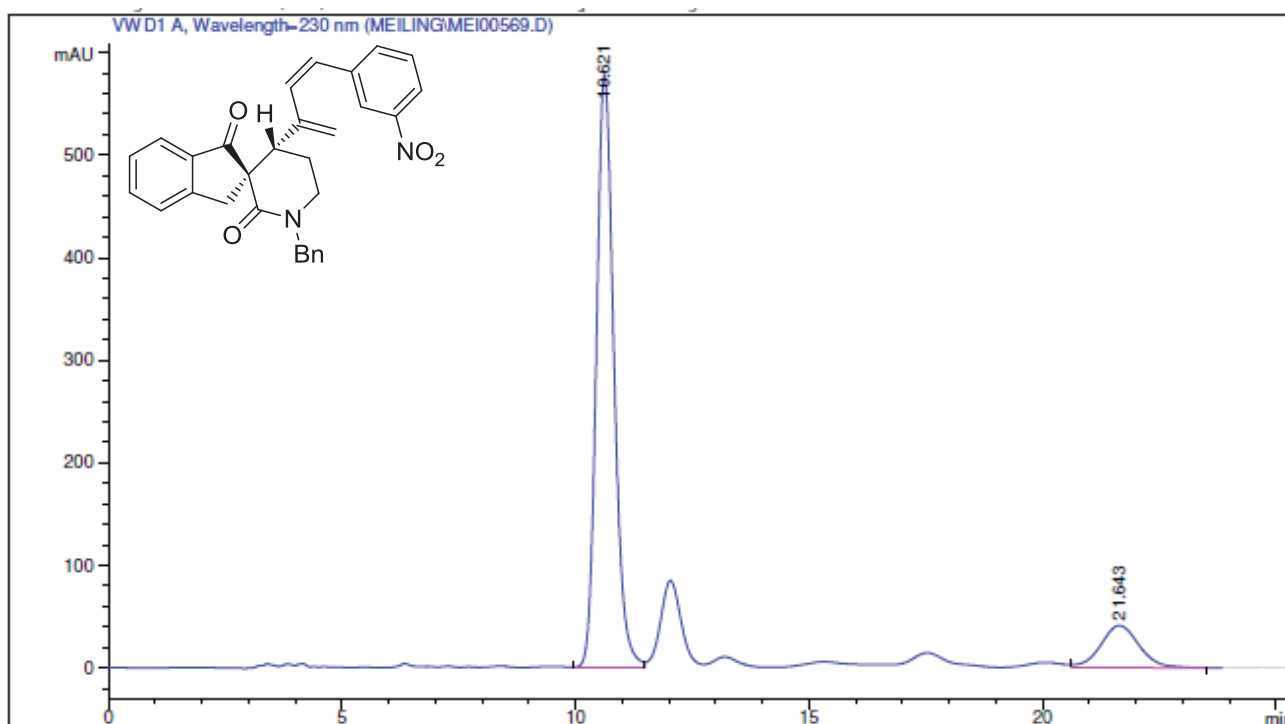

-----  
Area Percent Report  
-----

Sorted By : Signal  
Multiplier : 1.0000  
Dilution : 1.0000  
Use Multiplier & Dilution Factor with ISTDs

Signal 1: VWD1 A, Wavelength-230 nm

| Peak # | RetTime [min] | Type | Width [min] | Area [mAU*s] | Height [mAU] | Area %  |
|--------|---------------|------|-------------|--------------|--------------|---------|
| 1      | 10.621        | VV   | 0.4020      | 1.50271e4    | 578.69391    | 86.3312 |
| 2      | 21.643        | VB   | 0.7034      | 2379.22778   | 41.28006     | 13.6688 |

Totals : 1.74063e4 619.97397

Results obtained with enhanced integrator!

-----  
\*\*\* End of Report \*\*\*



$^1\text{H}$  NMR spectra of **2o**

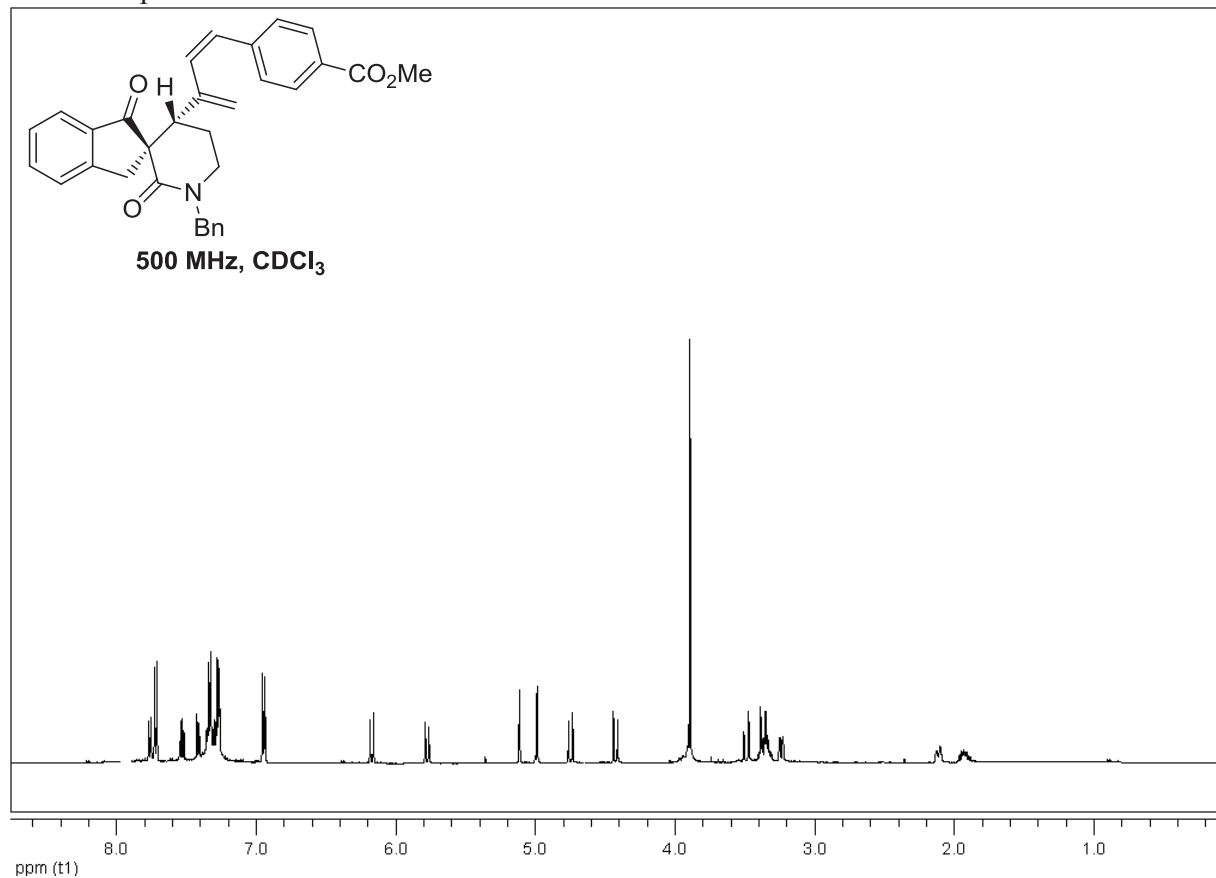

$^{13}\text{C}$  NMR spectra of **2o**

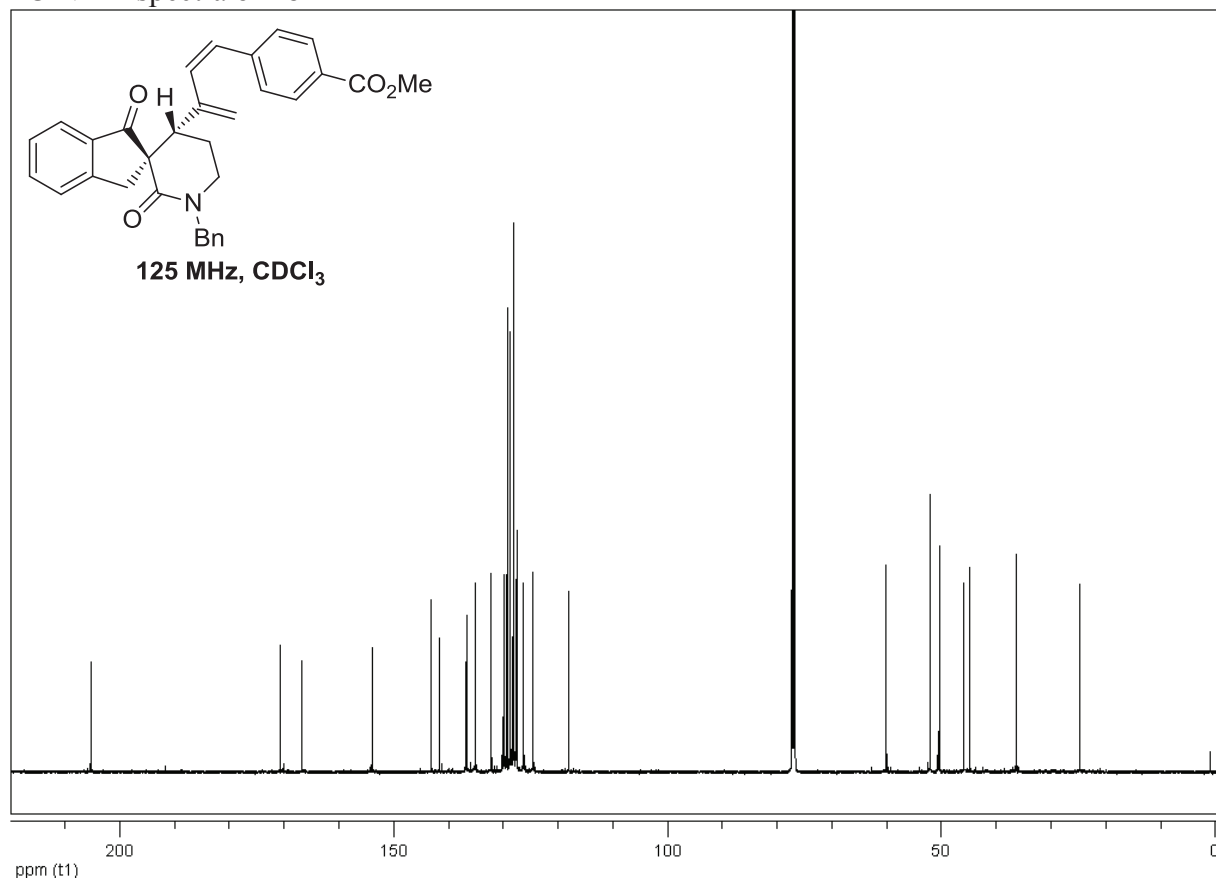

2o HPLC: Chiralcel AD; hexane/isopropanol 70:30; 1.0 mL/min

Racemic

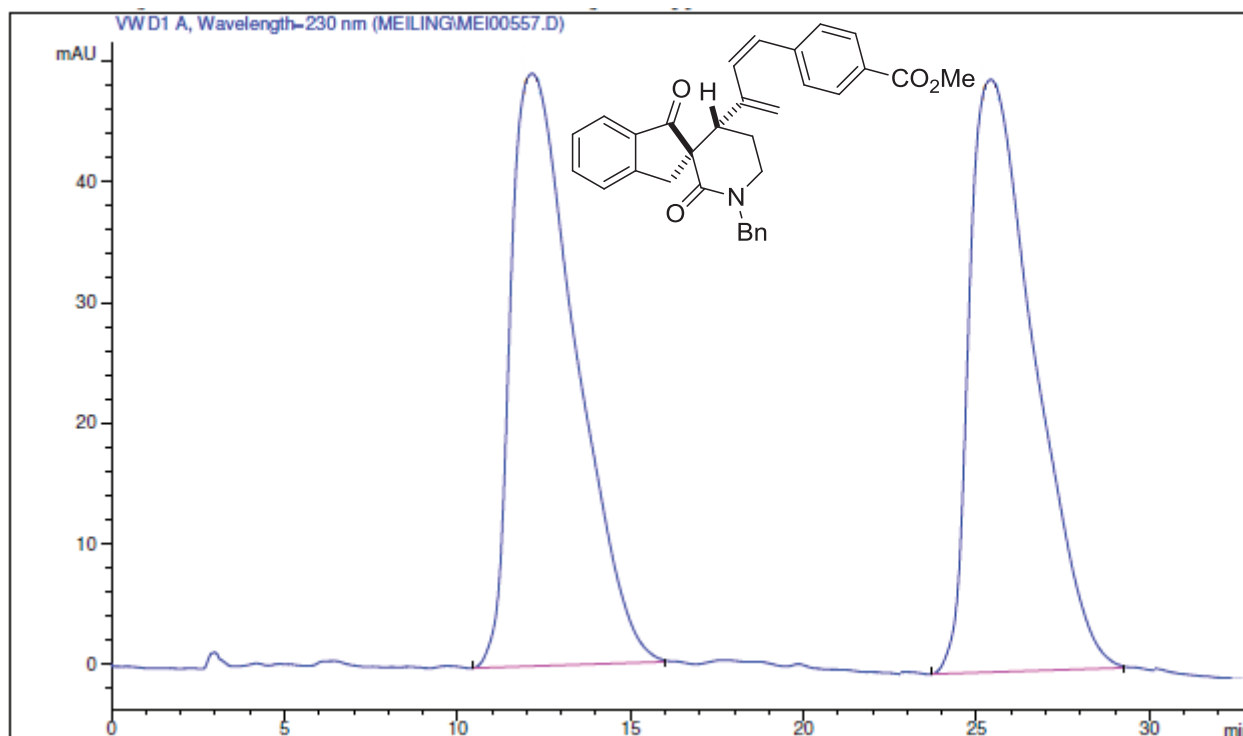

=====  
Area Percent Report  
=====

Sorted By : Signal  
Multiplier : 1.0000  
Dilution : 1.0000  
Use Multiplier & Dilution Factor with ISTDs

Signal 1: VWD1 A, Wavelength=230 nm

| Peak # | RetTime [min] | Type | Width [min] | Area [mAU*s] | Height [mAU] | Area %  |
|--------|---------------|------|-------------|--------------|--------------|---------|
| 1      | 12.156        | PB   | 1.8330      | 3500.56494   | 49.09288     | 50.7575 |
| 2      | 25.428        | BB   | 2.5722      | 3510.34579   | 49.10059     | 49.2425 |

Totals : 7070.05457 52.02750

Results obtained with enhanced integrator!

=====  
\*\*\* End of Report \*\*\*

2o HPLC: Chiralcel AD; hexane/isopropanol 70:30; 1.0 mL/min

Enantioenriched

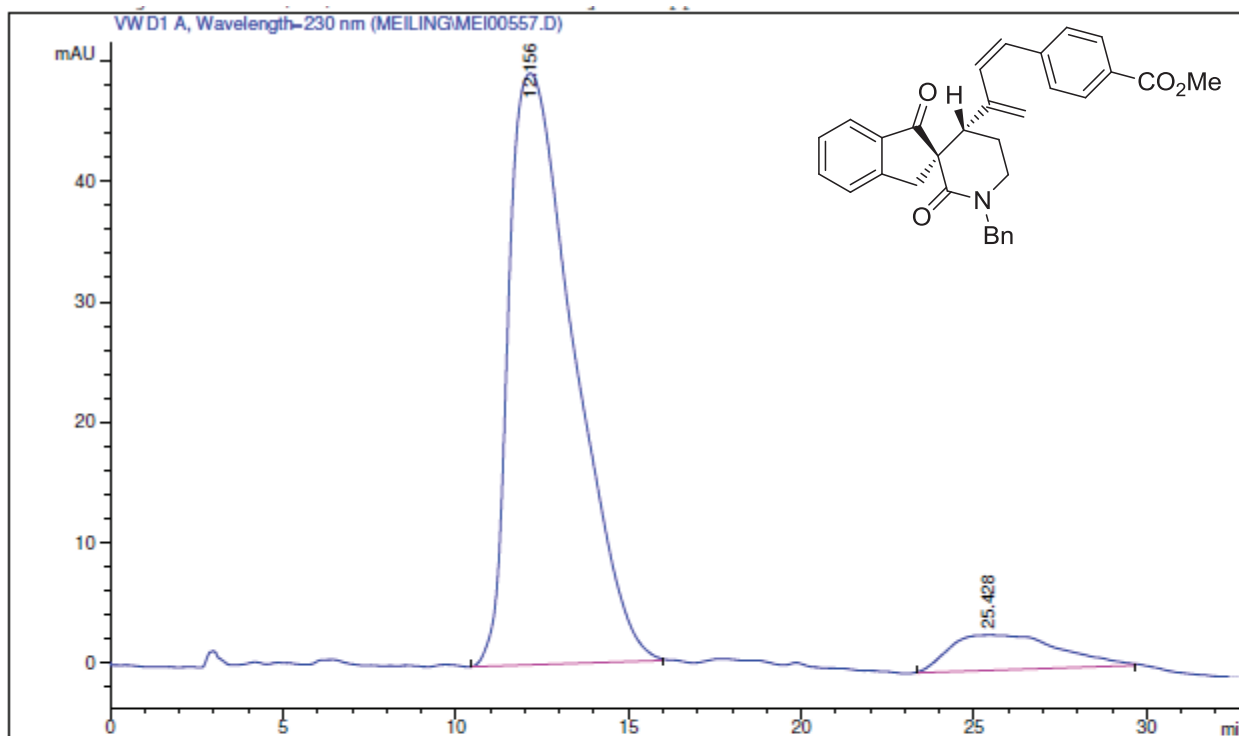

-----  
Area Percent Report  
-----

Sorted By : Signal  
Multiplier : 1.0000  
Dilution : 1.0000  
Use Multiplier & Dilution Factor with ISTDs

Signal 1: VWD1 A, Wavelength=230 nm

| Peak # | RetTime [min] | Type | Width [min] | Area [mAU*s] | Height [mAU] | Area %  |
|--------|---------------|------|-------------|--------------|--------------|---------|
| 1      | 12.156        | PB   | 1.8330      | 6425.56494   | 49.09288     | 90.8842 |
| 2      | 25.428        | BB   | 2.5722      | 644.48962    | 2.93461      | 9.1158  |

Totals : 7070.05457 52.02750

Results obtained with enhanced integrator!

-----  
\*\*\* End of Report \*\*\*

$^1\text{H}$  NMR spectra of **2p**

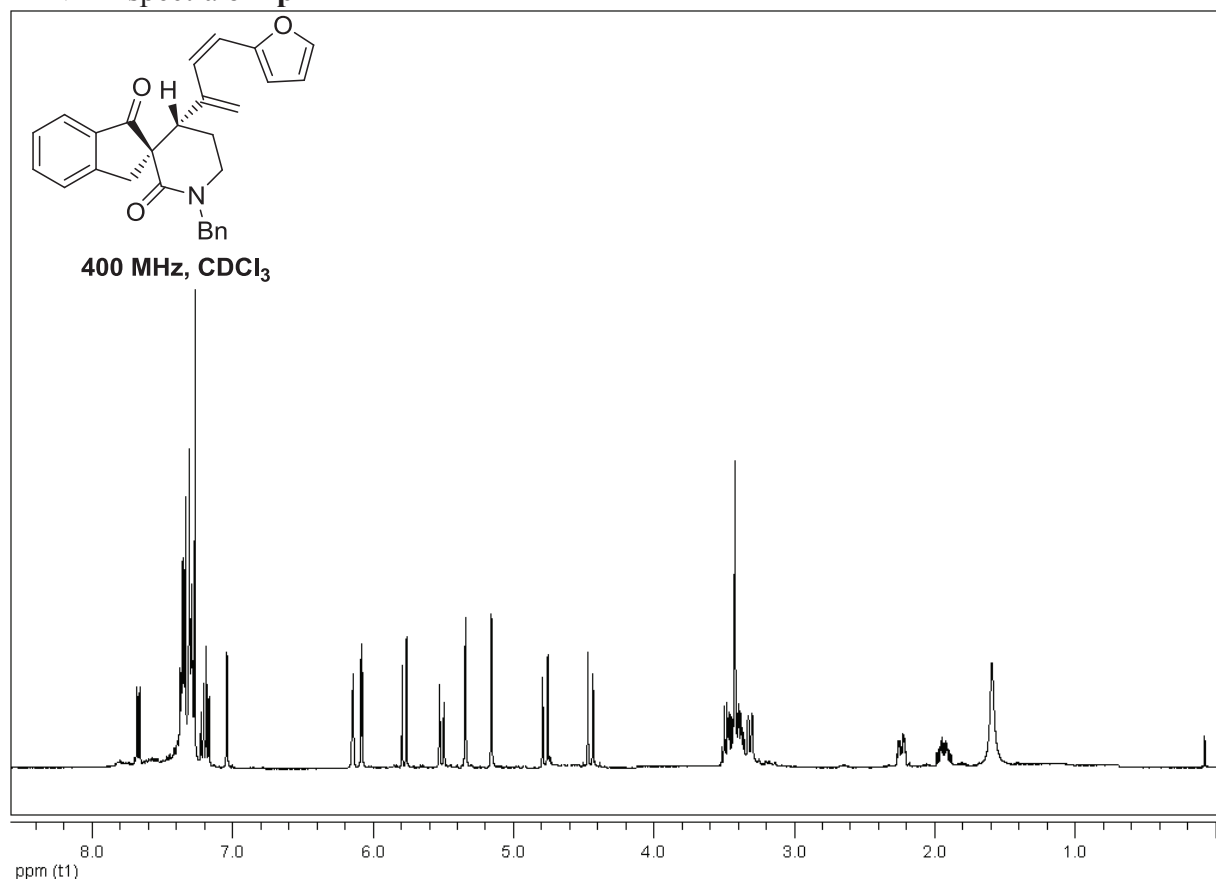

$^{13}\text{C}$  NMR spectra of **2p**

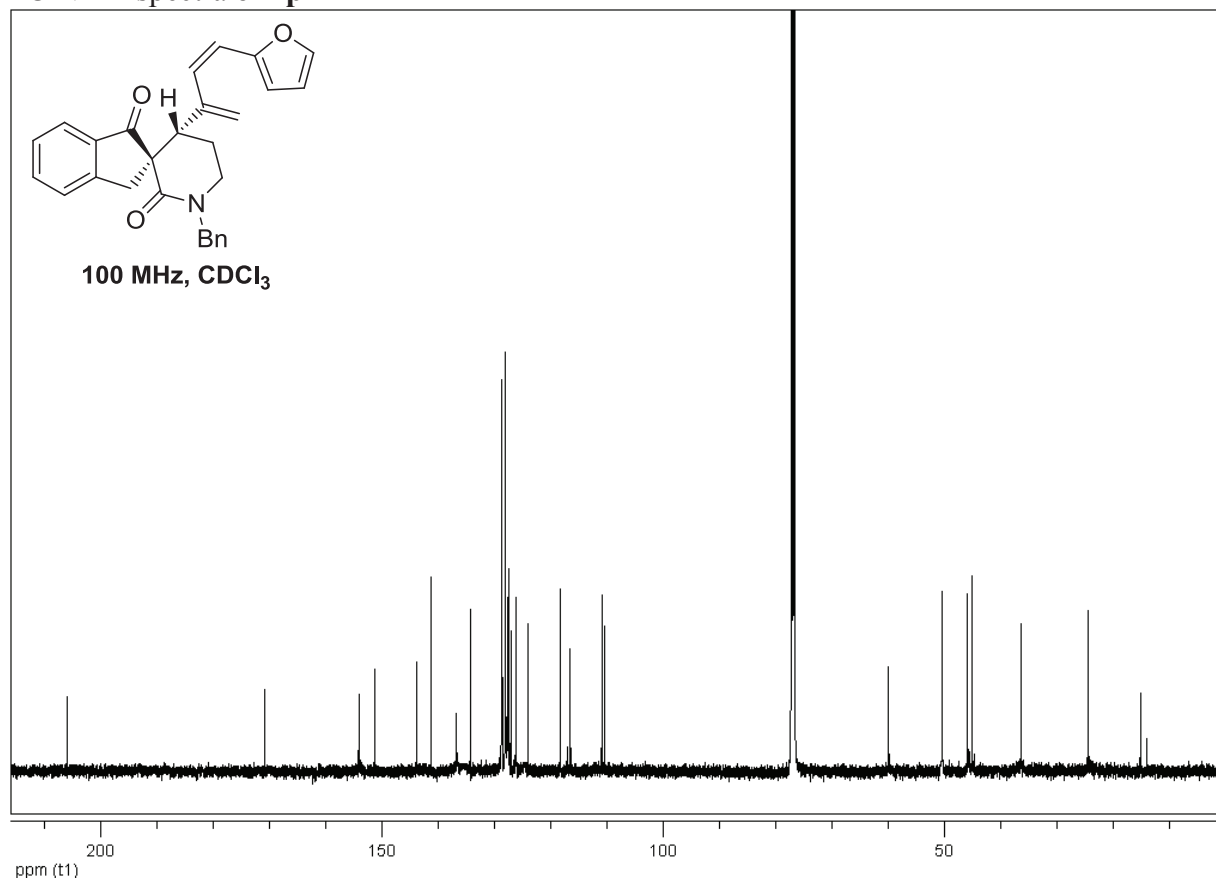

**2p** HPLC: Chiralcel AD; hexane/isopropanol 70:30; 1.0 mL/min

Racemic

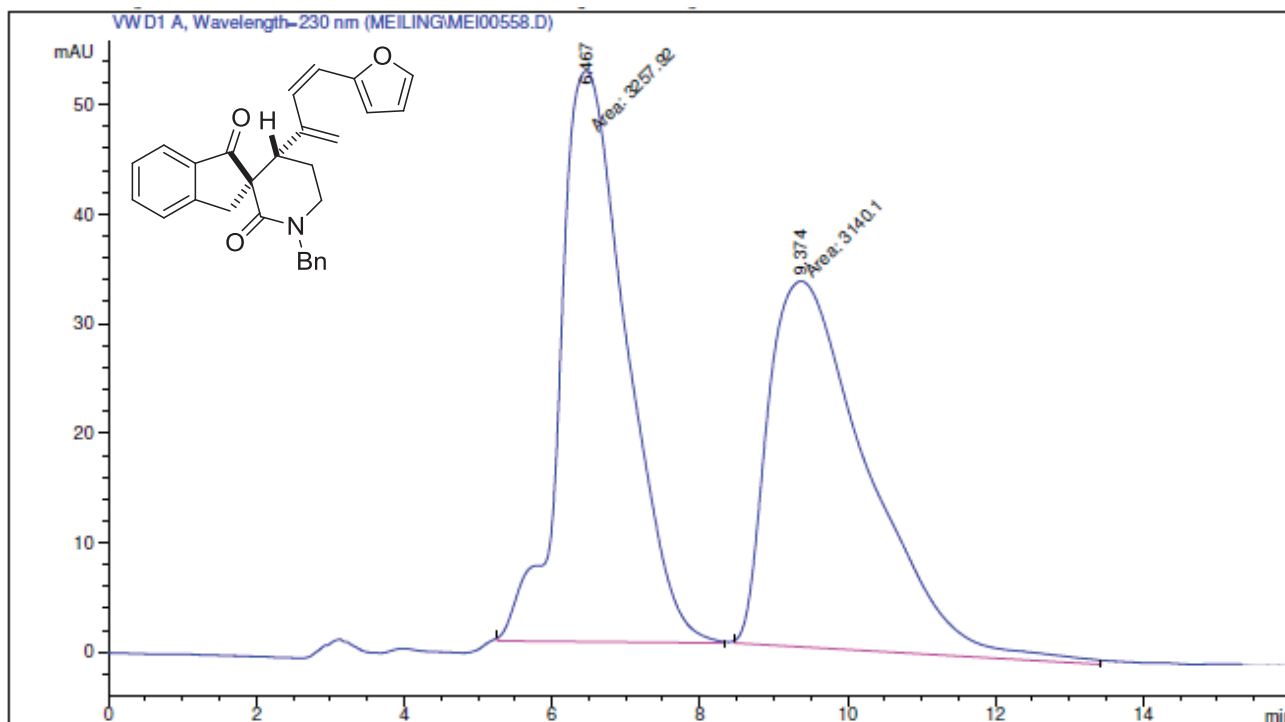

Area Percent Report

Sorted By : Signal  
Multiplier : 1.0000  
Dilution : 1.0000  
Use Multiplier & Dilution Factor with ISTDs

Signal 1: VWD1 A, Wavelength=230 nm

| Peak # | RetTime [min] | Type | Width [min] | Area [mAU*s] | Height [mAU] | Area %  |
|--------|---------------|------|-------------|--------------|--------------|---------|
| 1      | 6.467         | MM   | 1.0422      | 3257.91797   | 52.10023     | 50.9207 |
| 2      | 9.374         | MM   | 1.5662      | 3140.09937   | 33.41520     | 49.0793 |

Totals : 6398.01733 85.51543

Results obtained with enhanced integrator!

\*\*\* End of Report \*\*\*

**2p** HPLC: Chiralcel AD; hexane/isopropanol 70:30; 1.0 mL/min

Enantioenriched

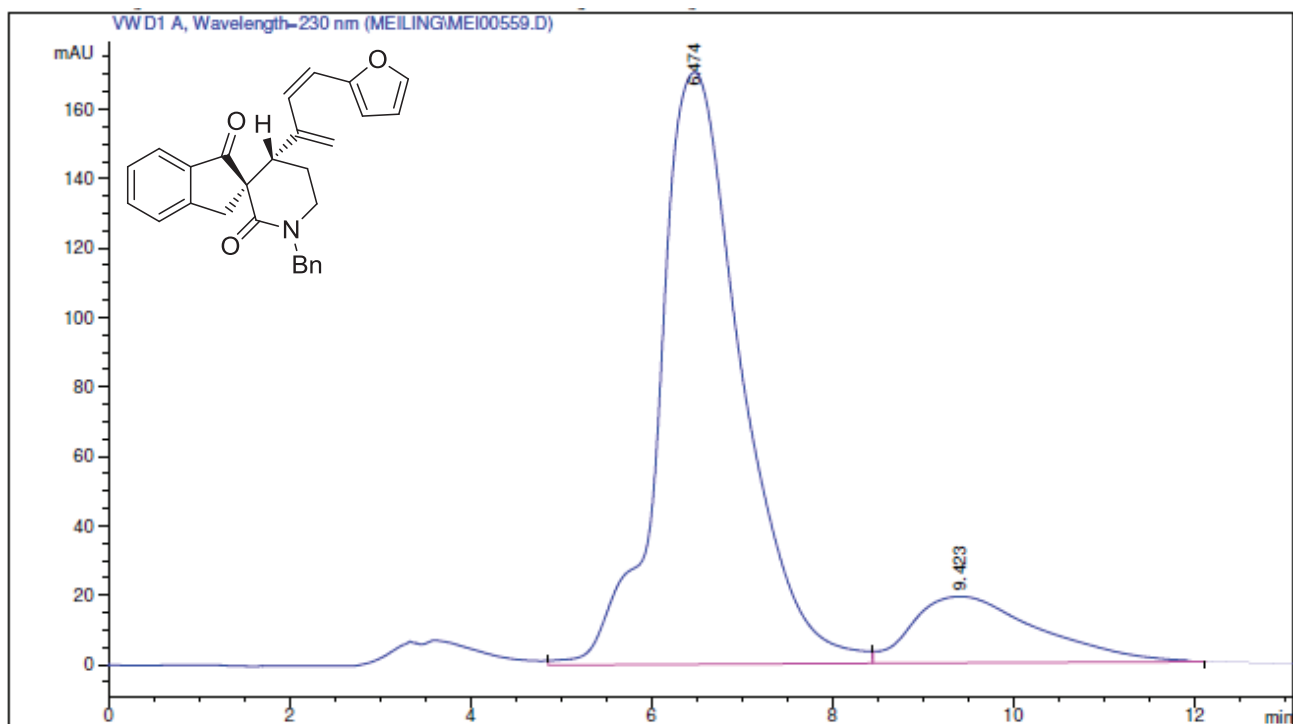

-----  
Area Percent Report  
-----

Sorted By : Signal  
Multiplier : 1.0000  
Dilution : 1.0000  
Use Multiplier & Dilution Factor with ISTDs

Signal 1: VWD1 A, Wavelength-230 nm

| Peak # | RetTime [min] | Type | Width [min] | Area [mAU*s] | Height [mAU] | Area %  |
|--------|---------------|------|-------------|--------------|--------------|---------|
| 1      | 6.474         | BB   | 0.8909      | 1.08010e4    | 170.53583    | 85.3514 |
| 2      | 9.423         | BB   | 1.1337      | 1853.75073   | 19.12747     | 14.6486 |

Totals : 1.26548e4 189.66330

Results obtained with enhanced integrator!

-----  
\*\*\* End of Report \*\*\*

$^1\text{H}$  NMR spectra of **2q**

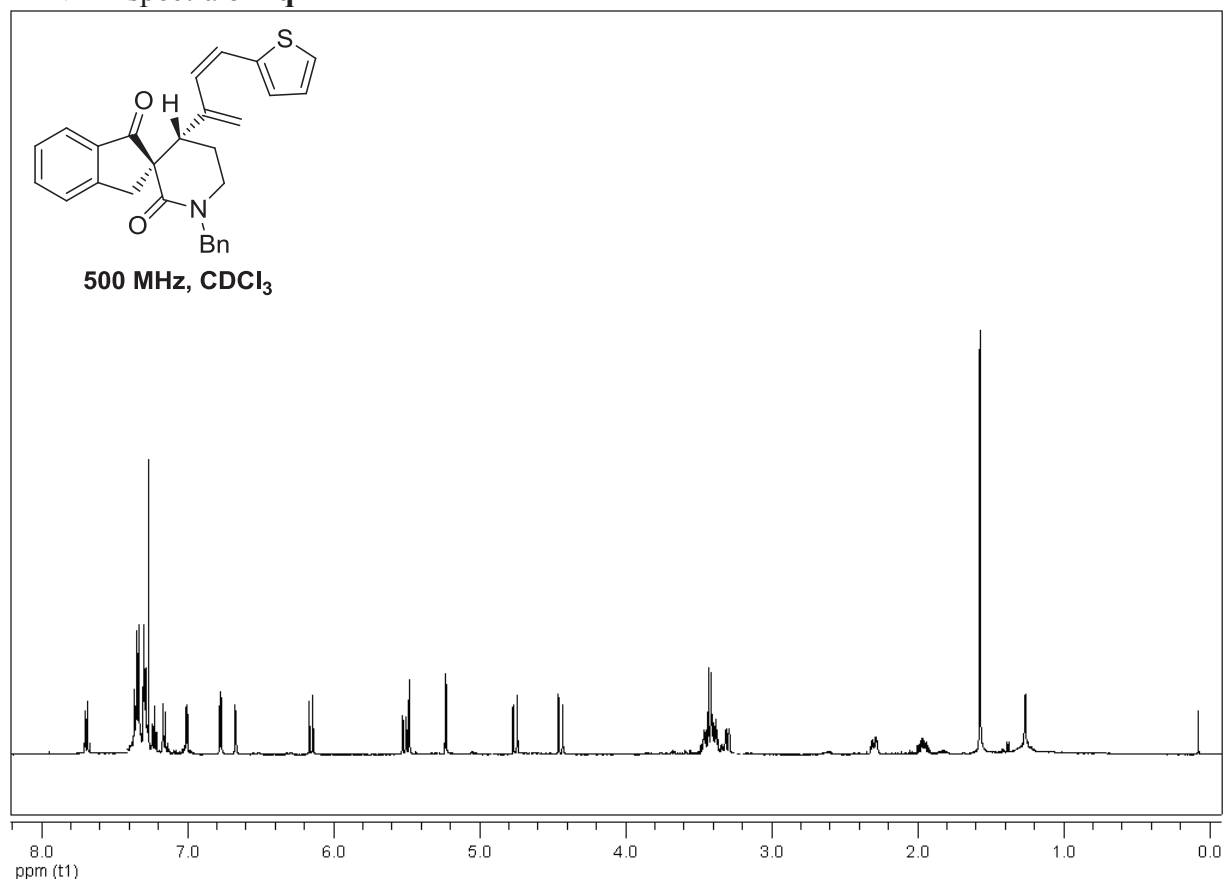

$^{13}\text{C}$  NMR spectra of **2q**

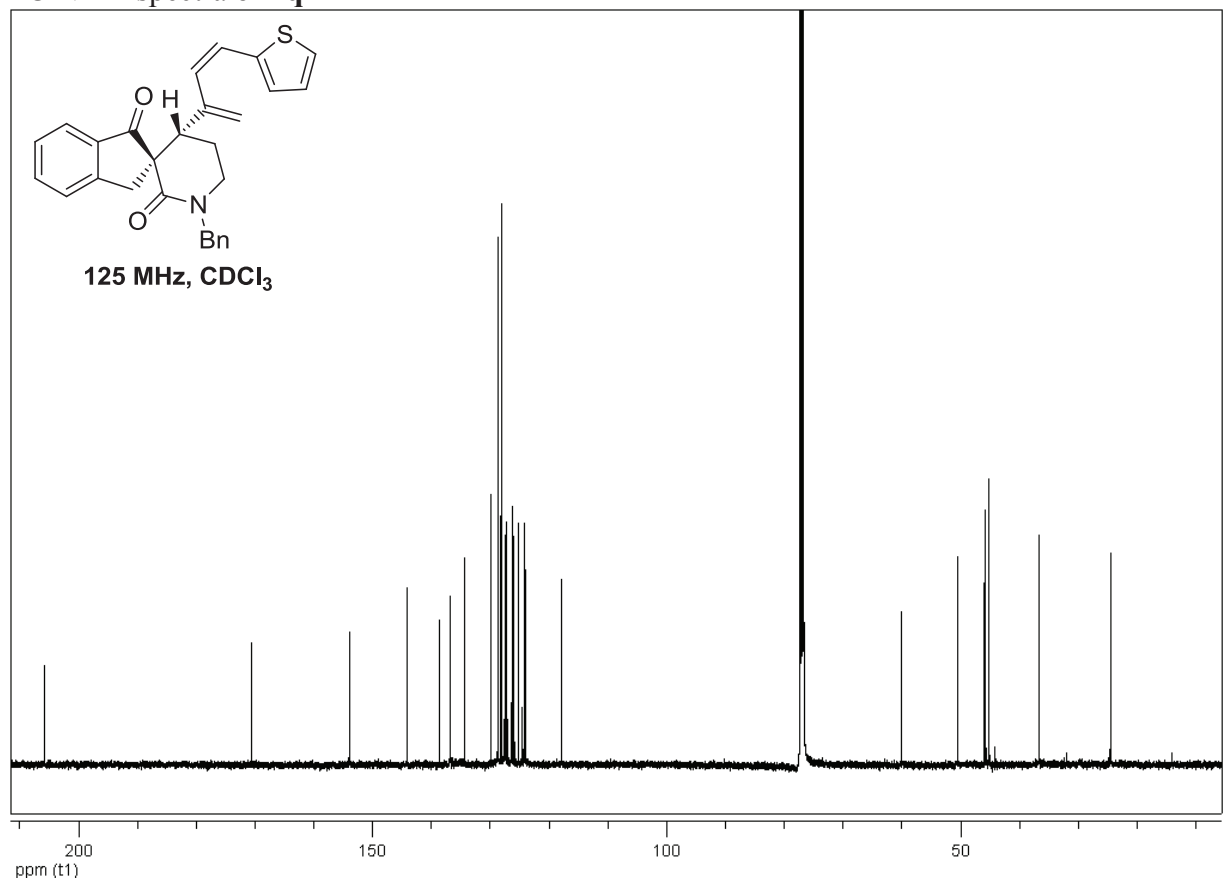

**2q** HPLC: Chiralcel AD; hexane/isopropanol 60:40; 1.0 mL/min

Racemic

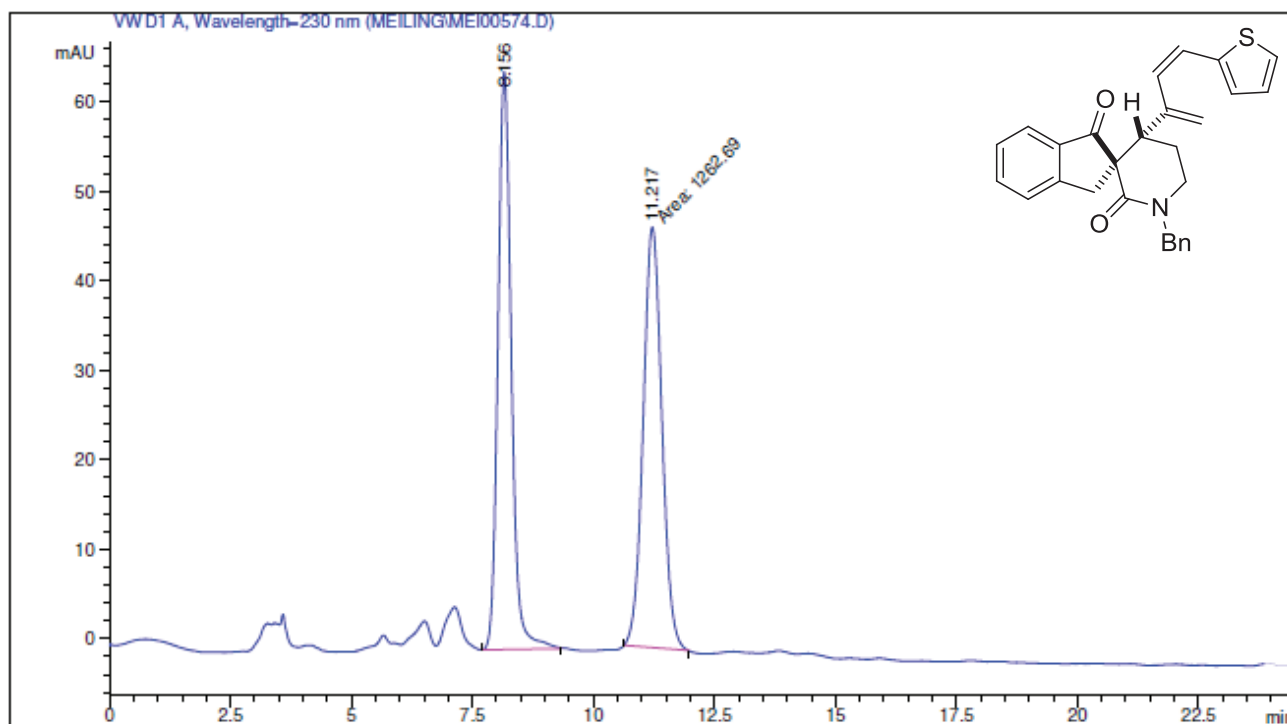

-----  
Area Percent Report  
-----

Sorted By : Signal  
Multiplier : 1.0000  
Dilution : 1.0000  
Use Multiplier & Dilution Factor with ISTDs

Signal 1: VWD1 A, Wavelength-230 nm

| Peak # | RetTime [min] | Type | Width [min] | Area [mAU*s] | Height [mAU] | Area %  |
|--------|---------------|------|-------------|--------------|--------------|---------|
| 1      | 8.156         | VB   | 0.2945      | 1241.73877   | 64.53635     | 49.5817 |
| 2      | 11.217        | MM   | 0.4481      | 1262.68860   | 46.96820     | 50.4183 |

Totals : 2504.42737 111.50455

Results obtained with enhanced integrator!

-----  
\*\*\* End of Report \*\*\*



**2q** HPLC: Chiralcel AD; hexane/isopropanol 60:40; 1.0 mL/min

Enantioenriched

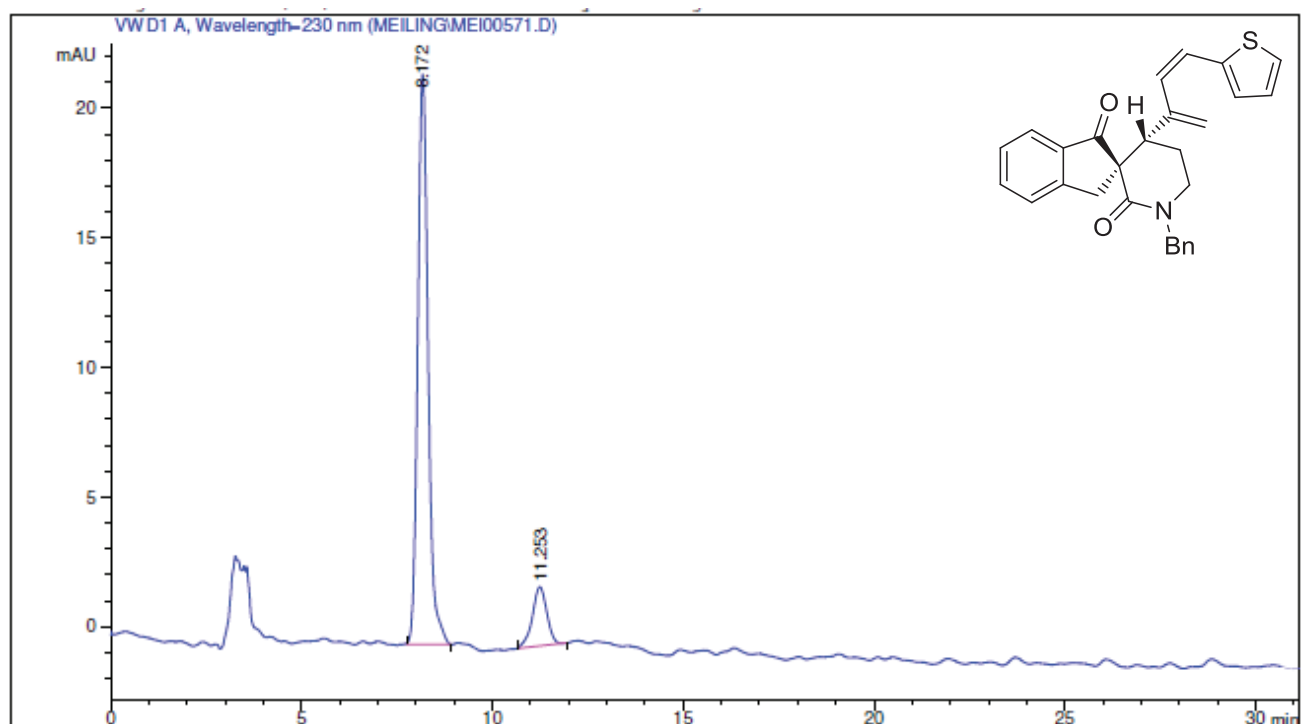

-----  
Area Percent Report  
-----

Sorted By : Signal  
Multiplier : 1.0000  
Dilution : 1.0000  
Use Multiplier & Dilution Factor with ISTDs

Signal 1: WVD1 A, Wavelength-230 nm

| Peak # | RetTime [min] | Type | Width [min] | Area [mAU*s] | Height [mAU] | Area %  |
|--------|---------------|------|-------------|--------------|--------------|---------|
| 1      | 8.172         | BP   | 0.2894      | 415.32596    | 21.98704     | 87.3919 |
| 2      | 11.253        | BP   | 0.3136      | 59.91946     | 2.28006      | 12.6081 |

Totals : 475.24541 24.26710

Results obtained with enhanced integrator!

-----  
\*\*\* End of Report \*\*\*  
-----

$^1\text{H}$  NMR spectrum of **4a**

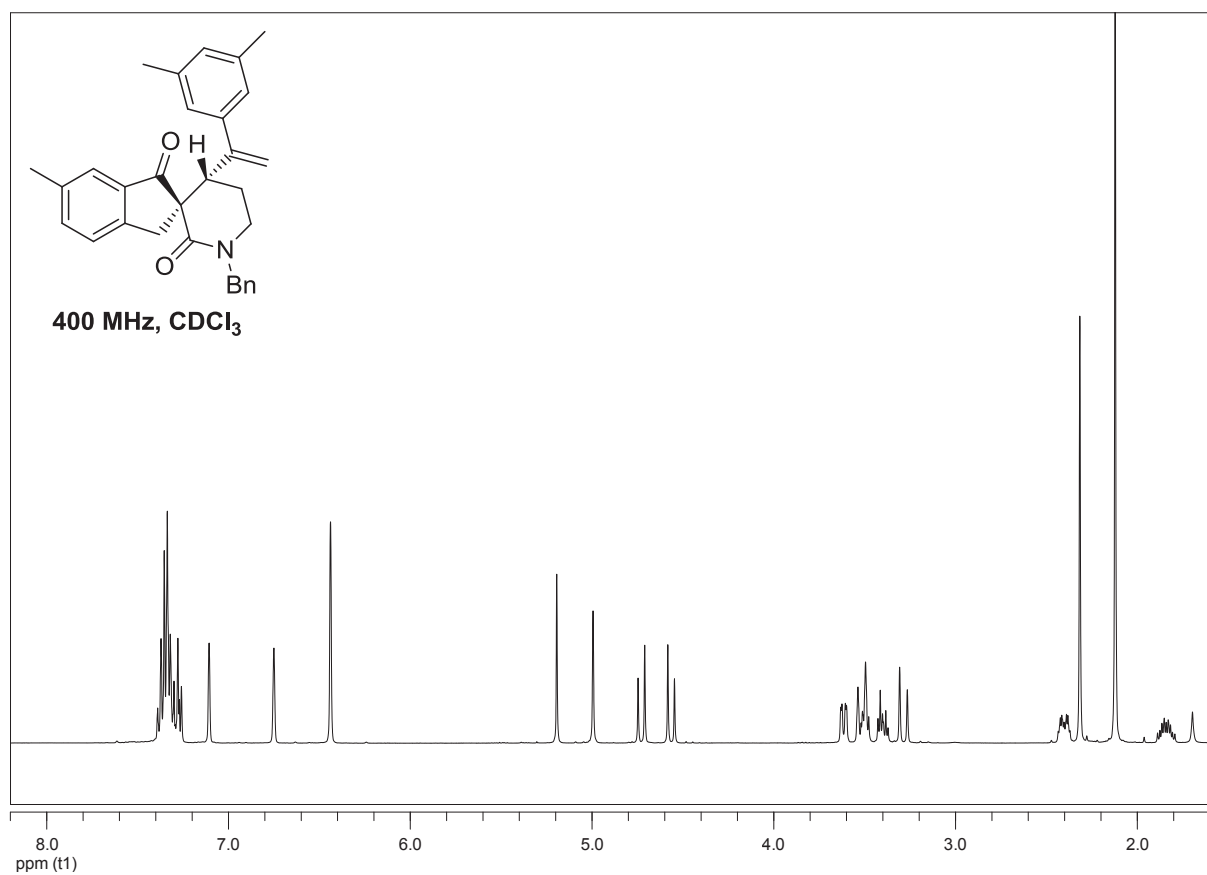

$^{13}\text{C}$  NMR spectrum of **4a**

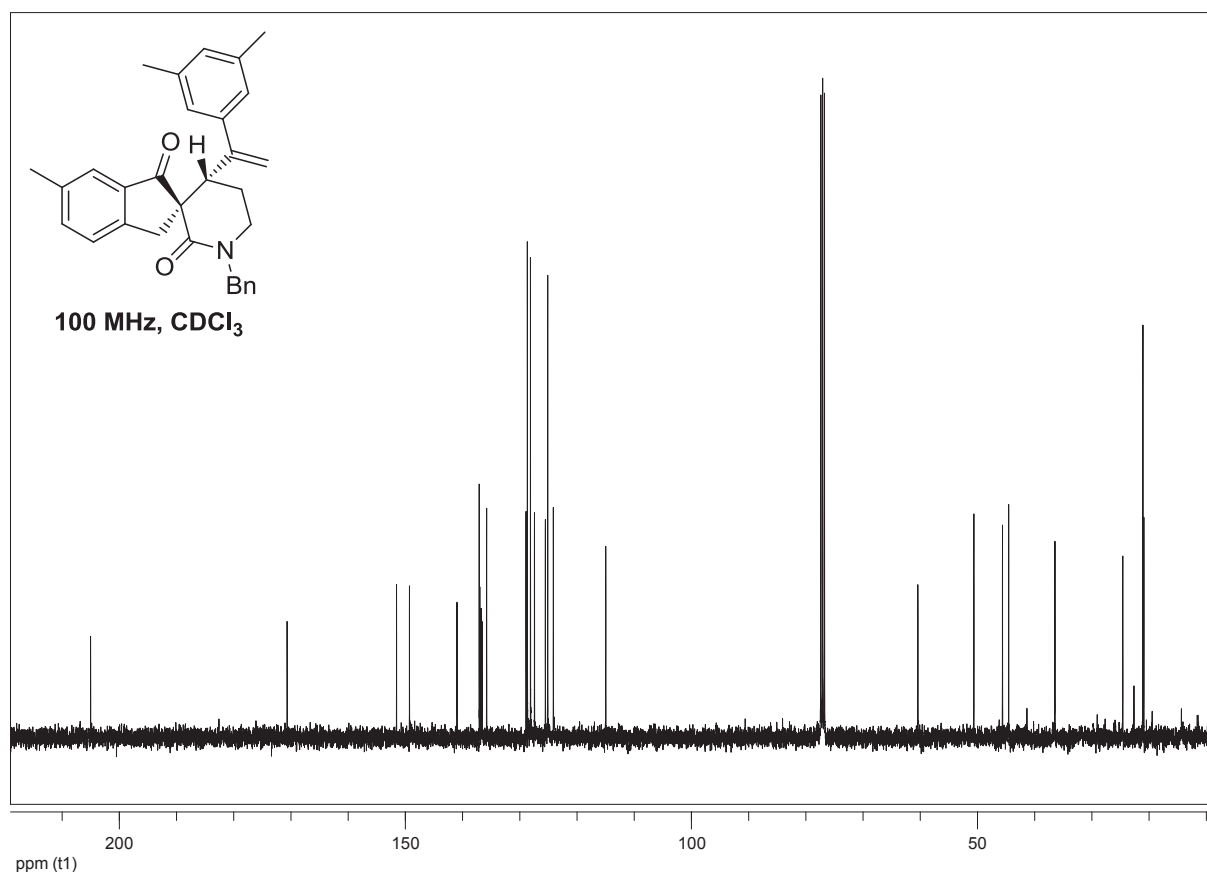

4a HPLC: Chiralcel AD; hexane/isopropanol 60:40; 1.0 mL/min

Racemic: Mixture of 2 diastereomers

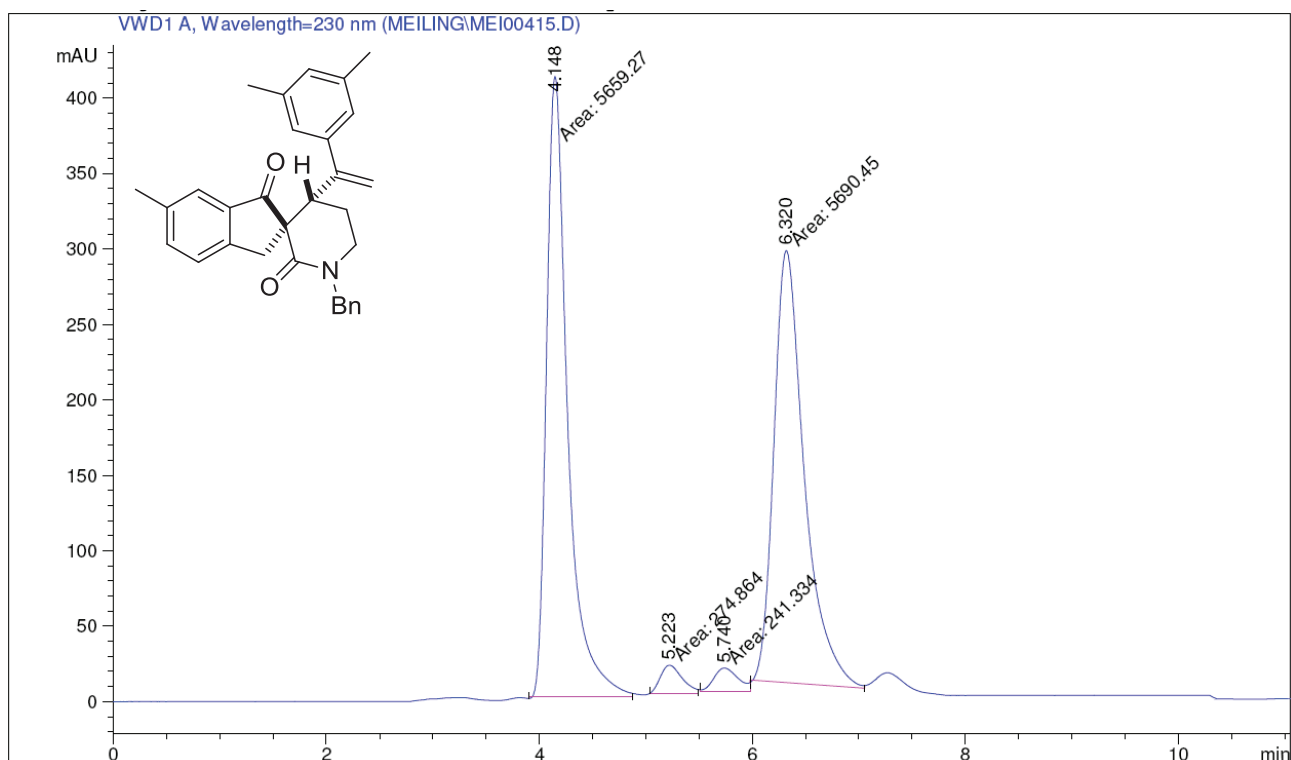

=====  
Area Percent Report  
=====

Sorted By : Signal  
Multiplier : 1.0000  
Dilution : 1.0000  
Use Multiplier & Dilution Factor with ISTDs

Signal 1: VWD1 A, Wavelength=230 nm

| Peak # | RetTime [min] | Type | Width [min] | Area [mAU*s] | Height [mAU] | Area %  |
|--------|---------------|------|-------------|--------------|--------------|---------|
| 1      | 4.148         | MM   | 0.2295      | 5659.27100   | 411.05594    | 47.6935 |
| 2      | 5.223         | MM   | 0.2409      | 274.86374    | 19.01653     | 2.3164  |
| 3      | 5.740         | MM   | 0.2630      | 241.33392    | 15.29310     | 2.0338  |
| 4      | 6.320         | MM   | 0.3313      | 5690.45117   | 286.25748    | 47.9563 |

Totals : 1.18659e4 731.62304

Results obtained with enhanced integrator!

=====  
\*\*\* End of Report \*\*\*

**4a** HPLC: Chiralcel AD; hexane/isopropanol 60:40; 1.0 mL/min

Enantioenriched

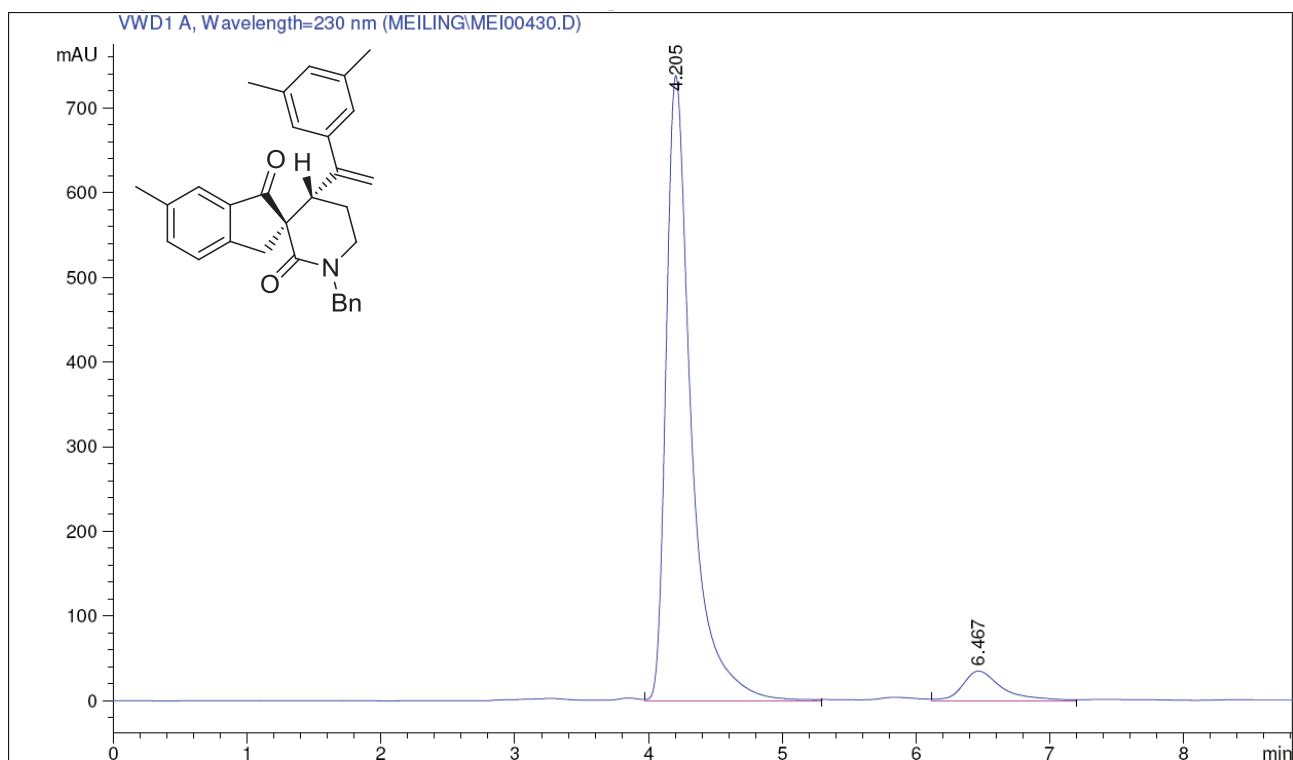

=====  
Area Percent Report  
=====

Sorted By : Signal  
Multiplier : 1.0000  
Dilution : 1.0000  
Use Multiplier & Dilution Factor with ISTDs

Signal 1: VWD1 A, Wavelength=230 nm

| Peak # | RetTime [min] | Type | Width [min] | Area [mAU*s] | Height [mAU] | Area %  |
|--------|---------------|------|-------------|--------------|--------------|---------|
| 1      | 4.205         | VB   | 0.1951      | 9693.18555   | 738.70569    | 92.9223 |
| 2      | 6.467         | VV   | 0.3086      | 738.30811    | 35.22147     | 7.0777  |

Totals : 1.04315e4 773.92715

Results obtained with enhanced integrator!

=====  
\*\*\* End of Report \*\*\*

$^1\text{H}$  NMR spectrum of **4b**

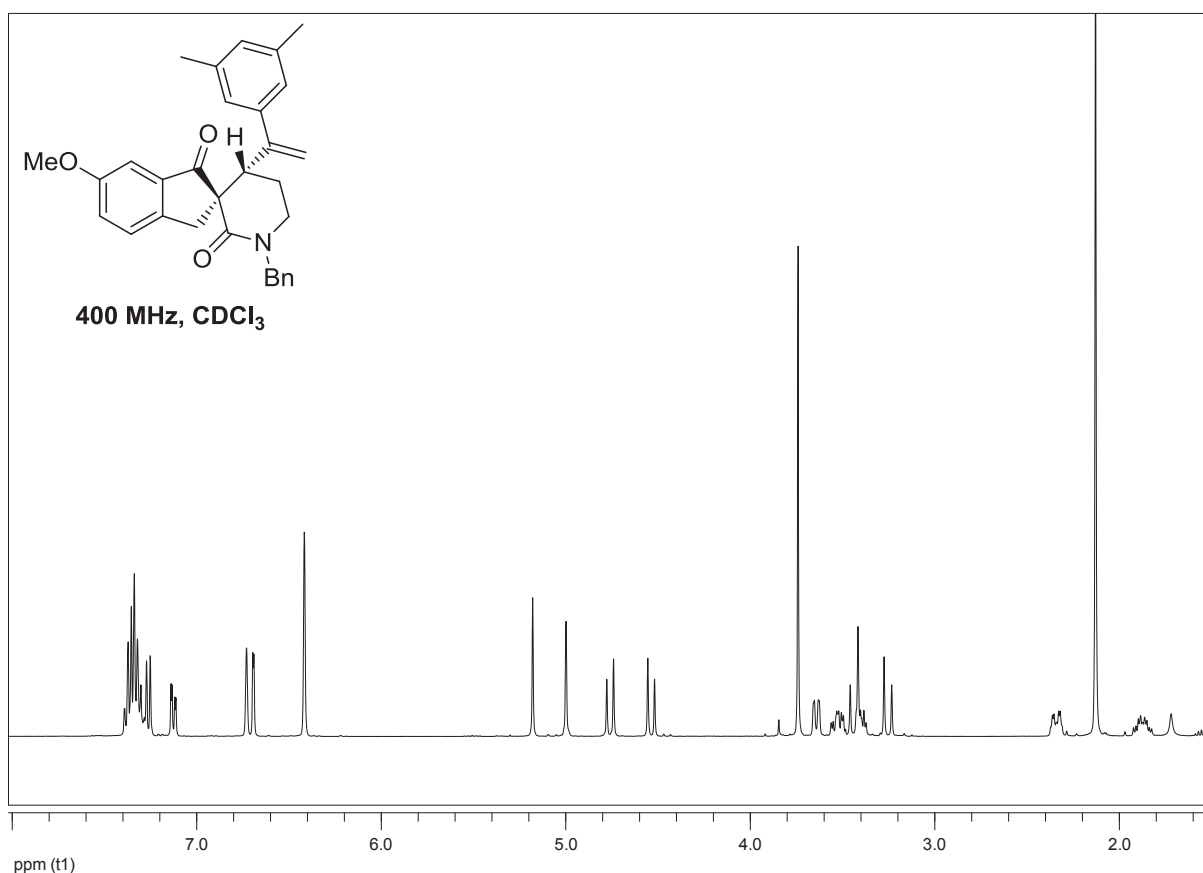

$^{13}\text{C}$  NMR spectrum of **4b**

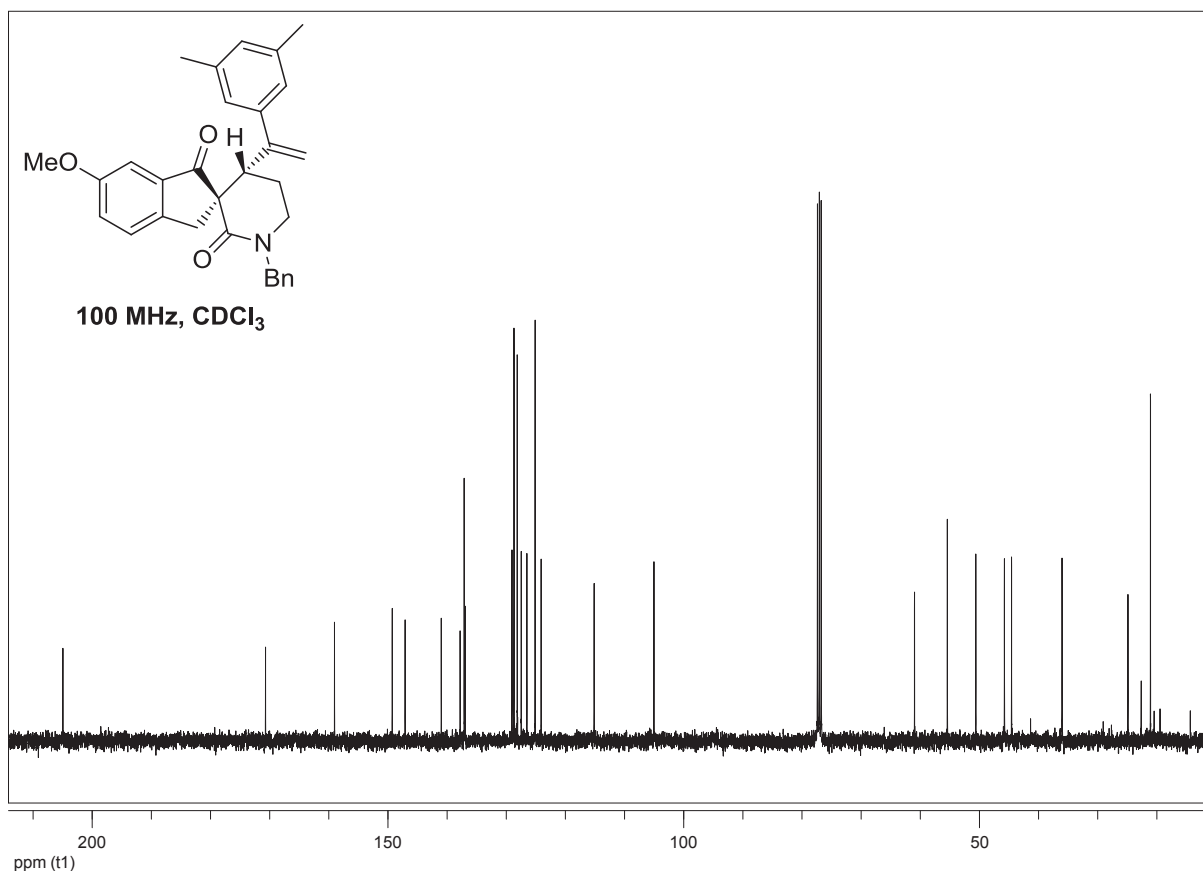

**4b** HPLC: Chiralcel AD; hexane/isopropanol 60:40; 1.0 mL/min

Racemic

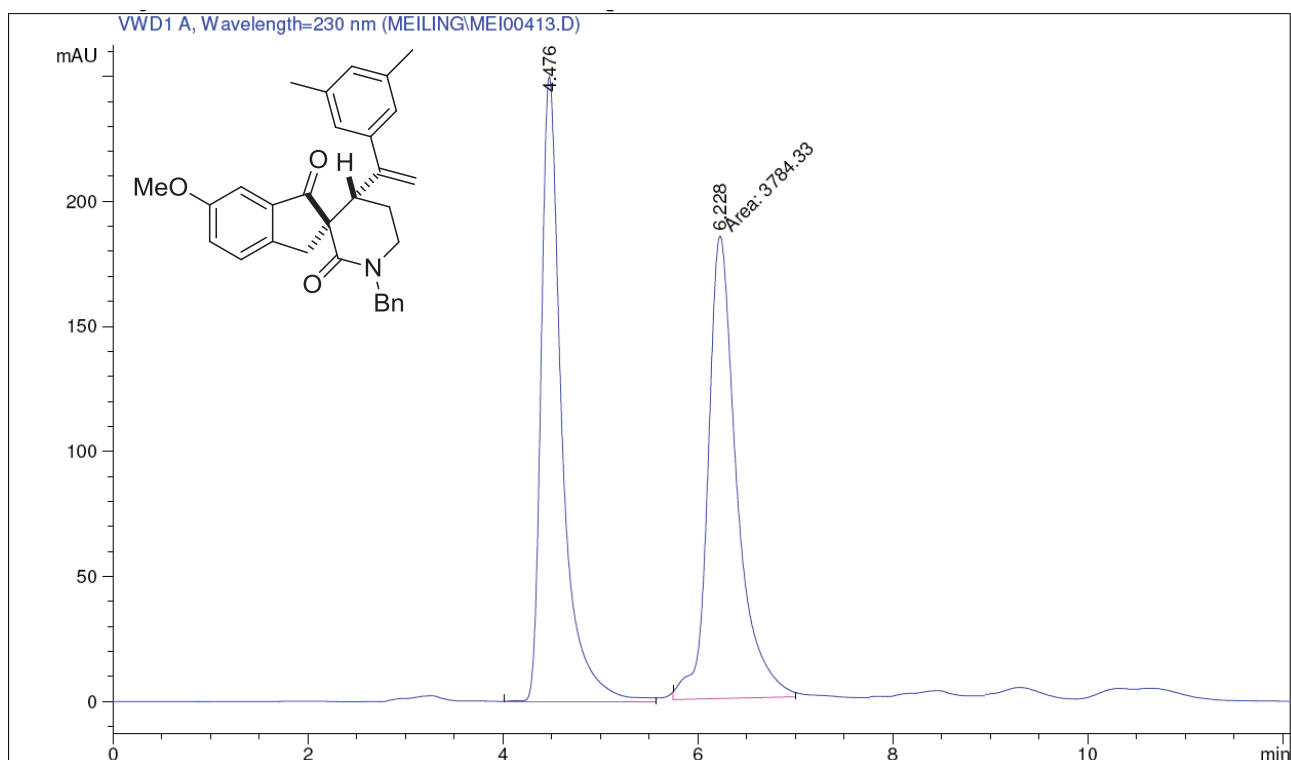

=====  
Area Percent Report  
=====

Sorted By : Signal  
Multiplier : 1.0000  
Dilution : 1.0000  
Use Multiplier & Dilution Factor with ISTDs

Signal 1: VWD1 A, Wavelength=230 nm

| Peak # | RetTime [min] | Type | Width [min] | Area [mAU*s] | Height [mAU] | Area %  |
|--------|---------------|------|-------------|--------------|--------------|---------|
| 1      | 4.476         | BV   | 0.2218      | 3722.85571   | 249.92801    | 49.5906 |
| 2      | 6.228         | MM   | 0.3410      | 3784.33057   | 184.98912    | 50.4094 |

Totals : 7507.18628 434.91713

Results obtained with enhanced integrator!

=====  
\*\*\* End of Report \*\*\*

**4b HPLC:** Chiralcel AD; hexane/isopropanol 60:40; 1.0 mL/min

Enantioenriched

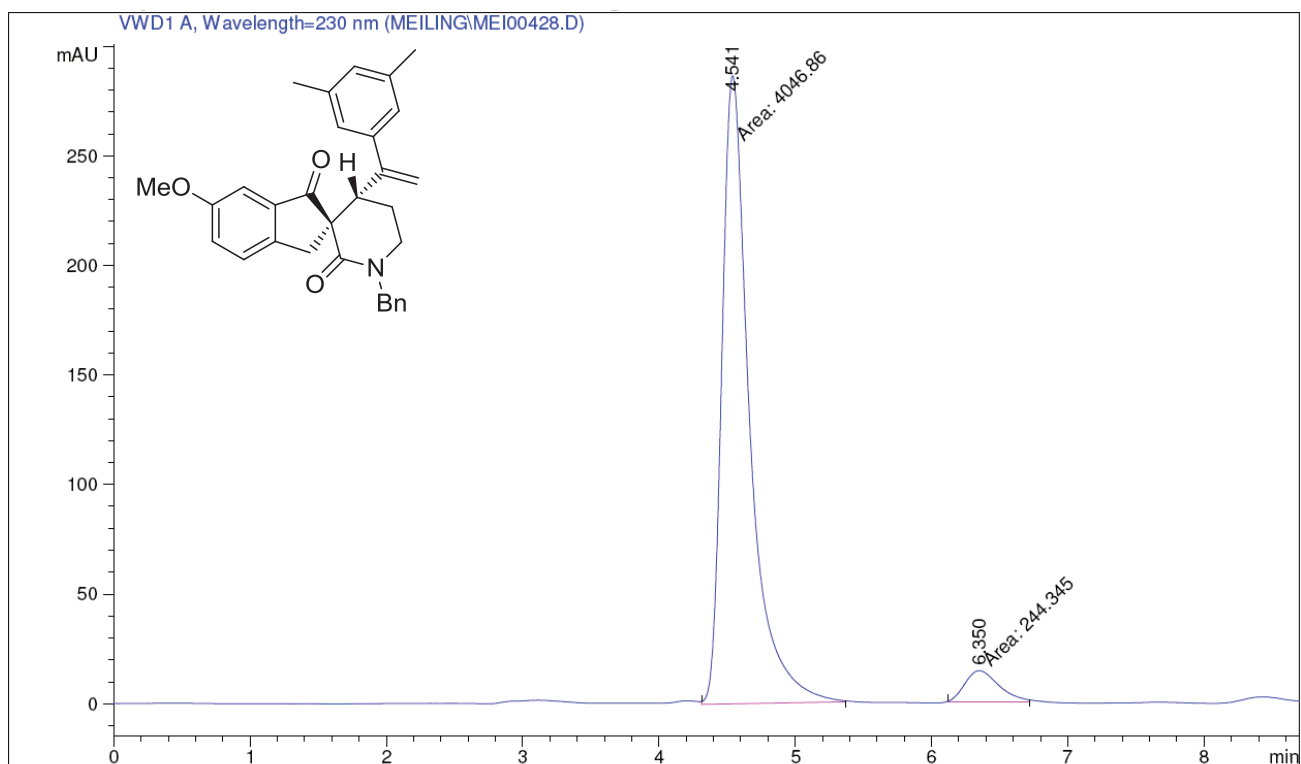

=====  
Area Percent Report  
=====

Sorted By : Signal  
Multiplier : 1.0000  
Dilution : 1.0000  
Use Multiplier & Dilution Factor with ISTDs

Signal 1: VWD1 A, Wavelength=230 nm

| Peak # | RetTime [min] | Type | Width [min] | Area [mAU*s] | Height [mAU] | Area %  |
|--------|---------------|------|-------------|--------------|--------------|---------|
| 1      | 4.541         | MM   | 0.2353      | 4046.85742   | 286.67120    | 94.3059 |
| 2      | 6.350         | MM   | 0.2870      | 244.34535    | 14.19119     | 5.6941  |

Totals : 4291.20277 300.86239

Results obtained with enhanced integrator!

=====  
\*\*\* End of Report \*\*\*

$^1\text{H}$  NMR spectrum of **4c**

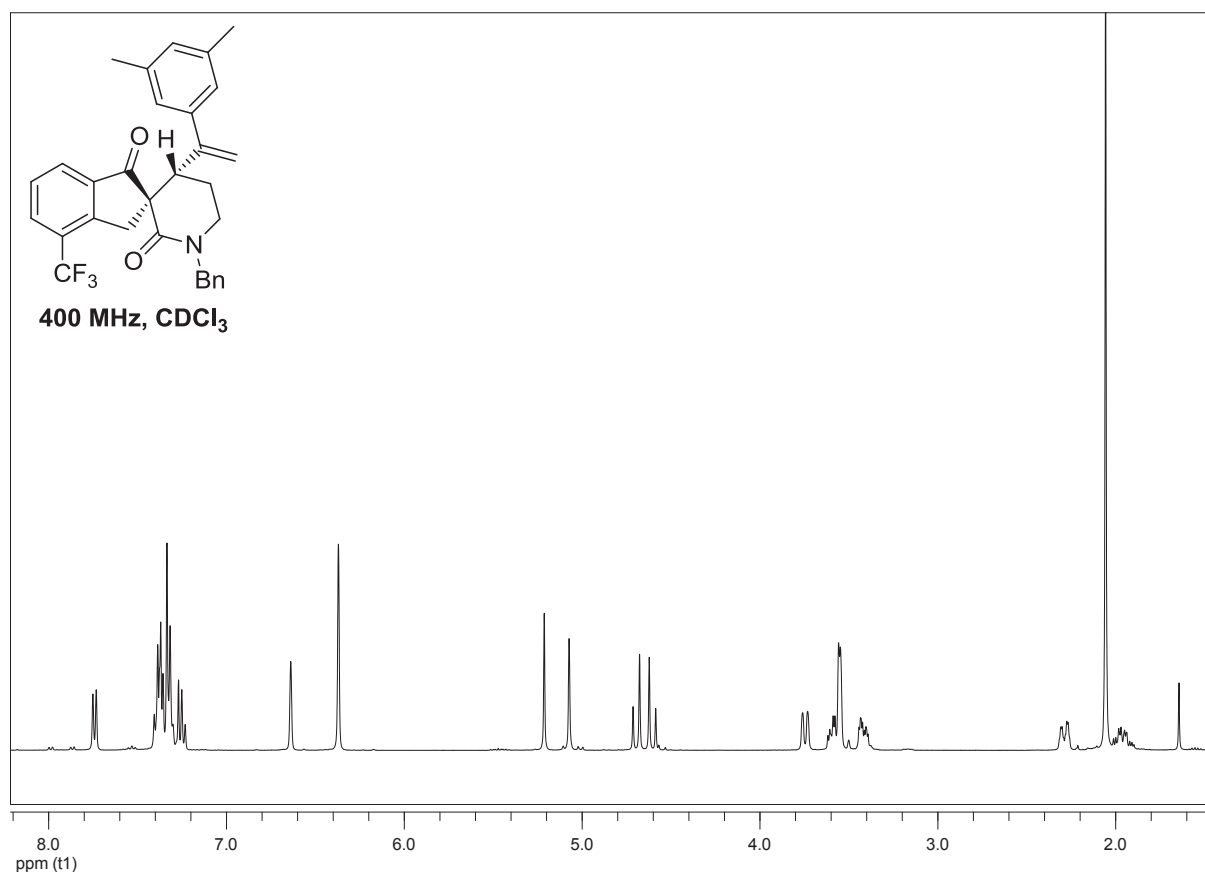

$^{13}\text{C}$  NMR spectrum of **4c**

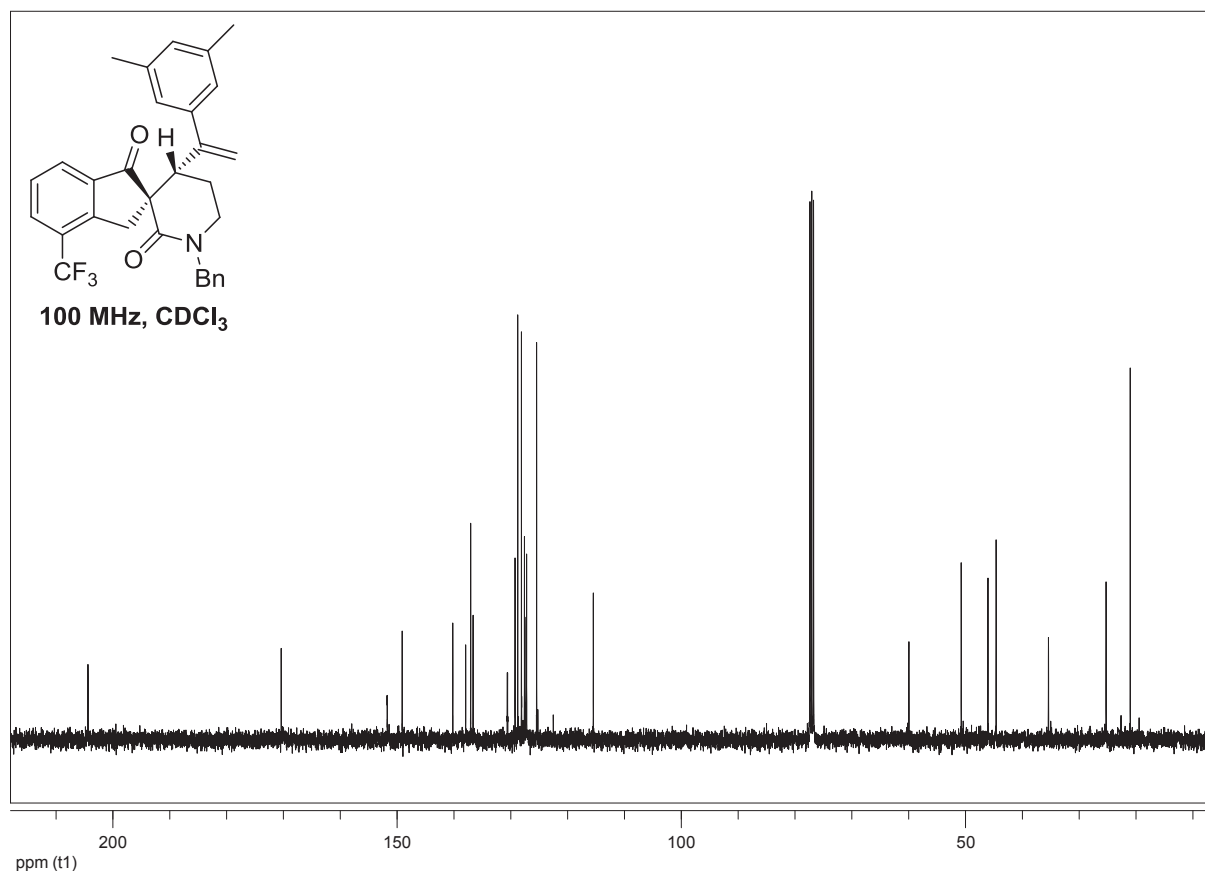



4c HPLC: Chiralcel AD; hexane/isopropanol 60:40; 1.0 mL/min

Racemic

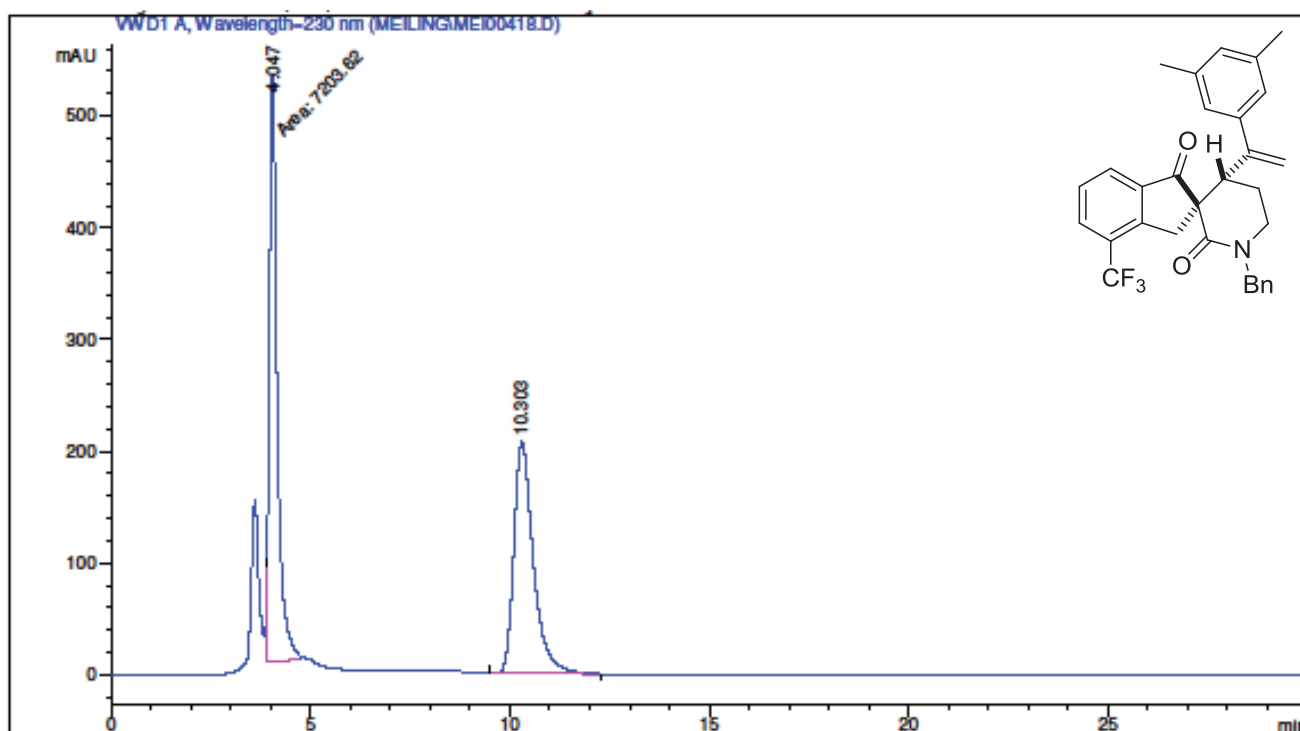

=====  
Area Percent Report  
=====

Sorted By : Signal  
Multiplier : 1.0000  
Dilution : 1.0000  
Use Multiplier & Dilution Factor with ISTDs

Signal 1: VWD1 A, Wavelength=230 nm

| Peak # | RetTime [min] | Type | Width [min] | Area [mAU*s] | Height [mAU] | Area %  |
|--------|---------------|------|-------------|--------------|--------------|---------|
| 1      | 4.047         | MM   | 0.2288      | 7203.61963   | 524.84137    | 50.5337 |
| 2      | 10.303        | PB   | 0.5043      | 7051.45605   | 207.08084    | 49.4663 |

Totals : 1.42551e4 731.92221

**4c** HPLC: Chiralcel AD; hexane/isopropanol 60:40; 1.0 mL/min

Enantioenriched

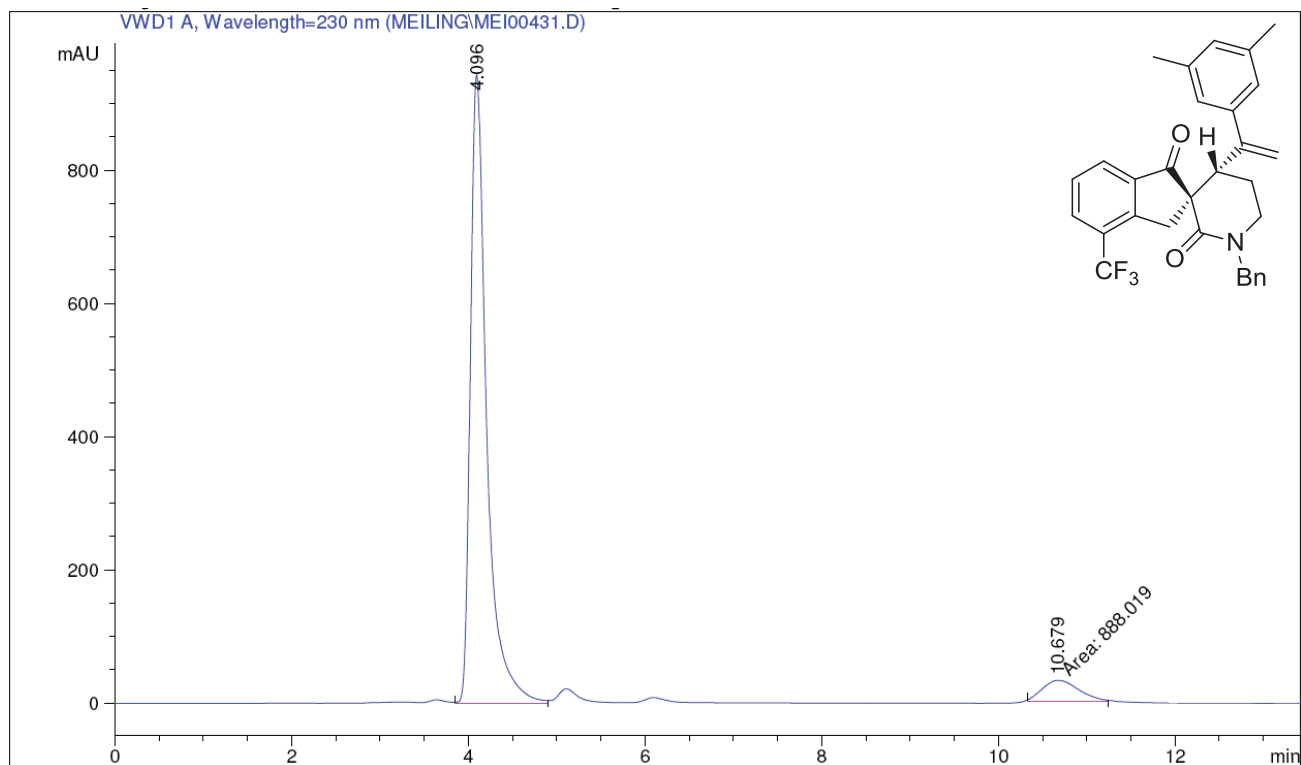

=====  
Area Percent Report  
=====

Sorted By : Signal  
Multiplier : 1.0000  
Dilution : 1.0000  
Use Multiplier & Dilution Factor with ISTDs

Signal 1: VWD1 A, Wavelength=230 nm

| Peak # | RetTime [min] | Type | Width [min] | Area [mAU*s] | Height [mAU] | Area %  |
|--------|---------------|------|-------------|--------------|--------------|---------|
| 1      | 4.096         | VV   | 0.1913      | 1.20677e4    | 943.10663    | 93.1458 |
| 2      | 10.679        | MM   | 0.4727      | 888.01855    | 31.30884     | 6.8542  |

Totals : 1.29558e4 974.41547

Results obtained with enhanced integrator!

=====  
\*\*\* End of Report \*\*\*

$^1\text{H}$  NMR spectrum of **4d**

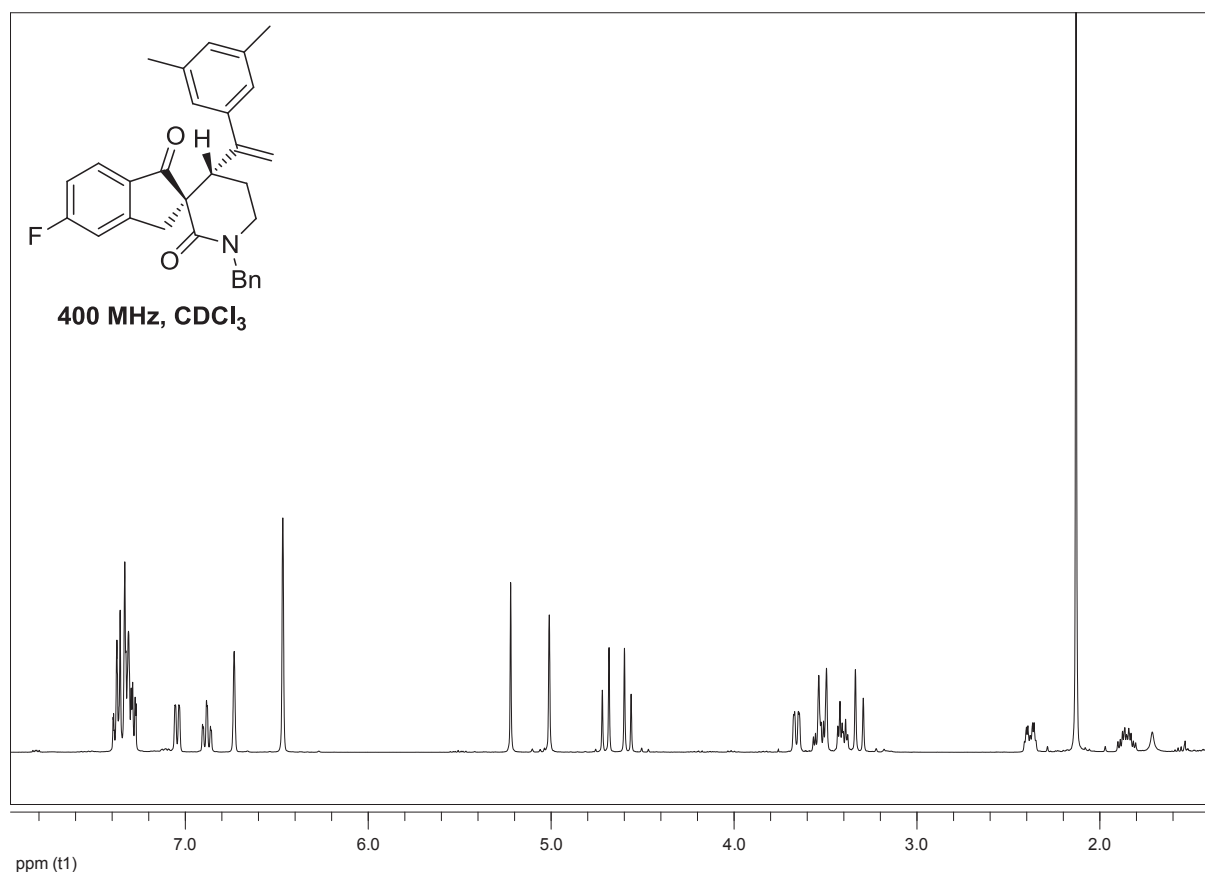

$^{13}\text{C}$  NMR spectrum of **4d**

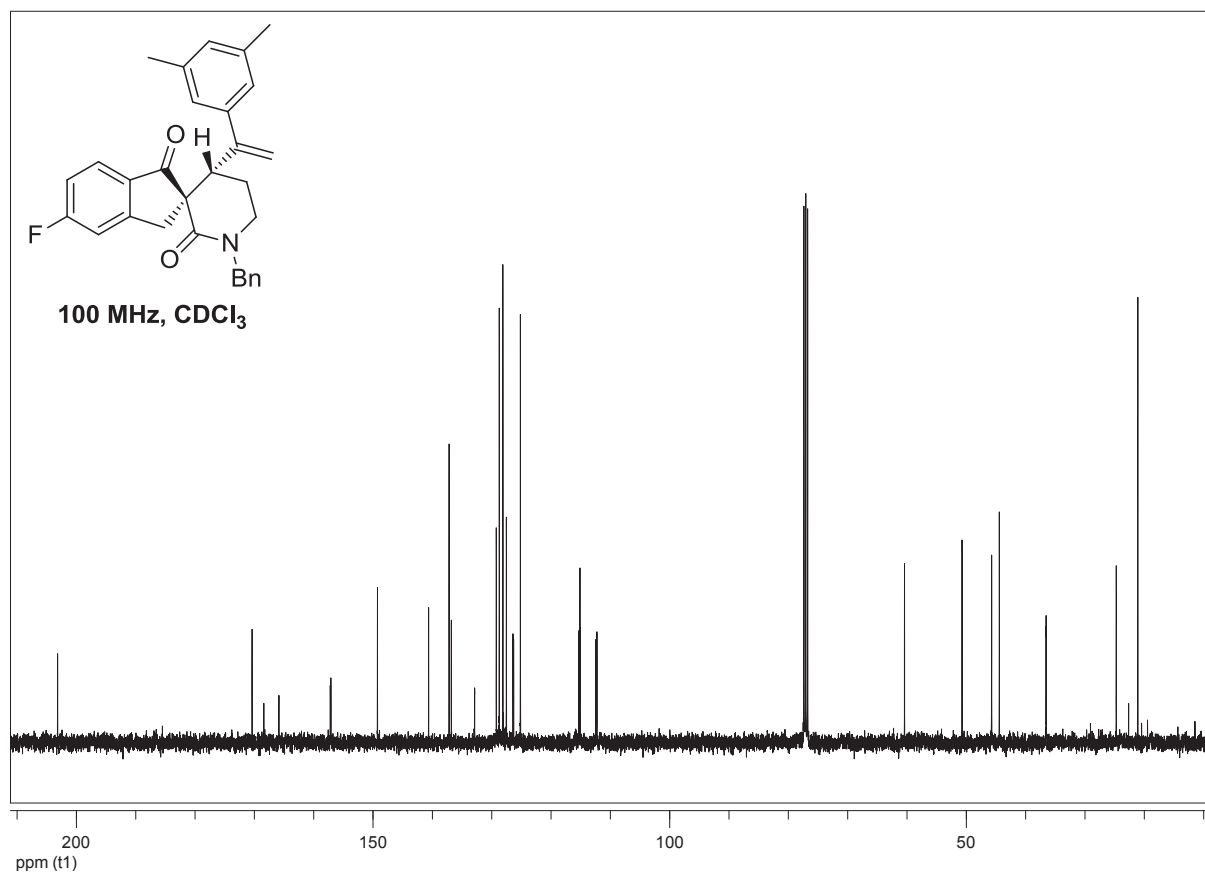

**4d** HPLC: Chiralcel AD; hexane/isopropanol 60:40; 1.0 mL/min

Racemic

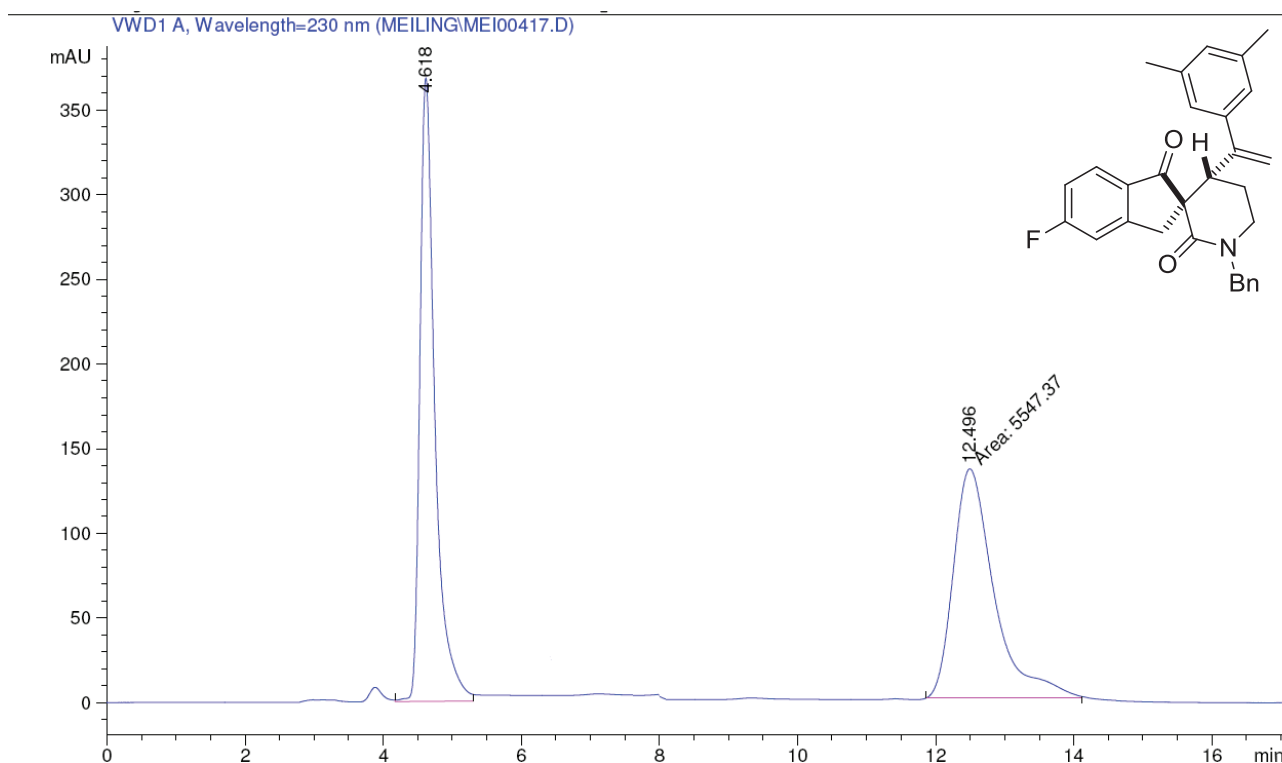

=====  
Area Percent Report  
=====

Sorted By : Signal  
Multiplier : 1.0000  
Dilution : 1.0000  
Use Multiplier & Dilution Factor with ISTDs

Signal 1: VWD1 A, Wavelength=230 nm

| Peak # | RetTime [min] | Type | Width [min] | Area [mAU*s] | Height [mAU] | Area %  |
|--------|---------------|------|-------------|--------------|--------------|---------|
| 1      | 4.618         | VV   | 0.2268      | 5582.42969   | 368.31384    | 50.1575 |
| 2      | 12.496        | MM   | 0.6837      | 5547.37207   | 135.22995    | 49.8425 |

Totals : 1.11298e4 503.54379

Results obtained with enhanced integrator!

=====  
\*\*\* End of Report \*\*\*

**4d** HPLC: Chiralcel AD; hexane/isopropanol 60:40; 1.0 mL/min

Enantioenriched

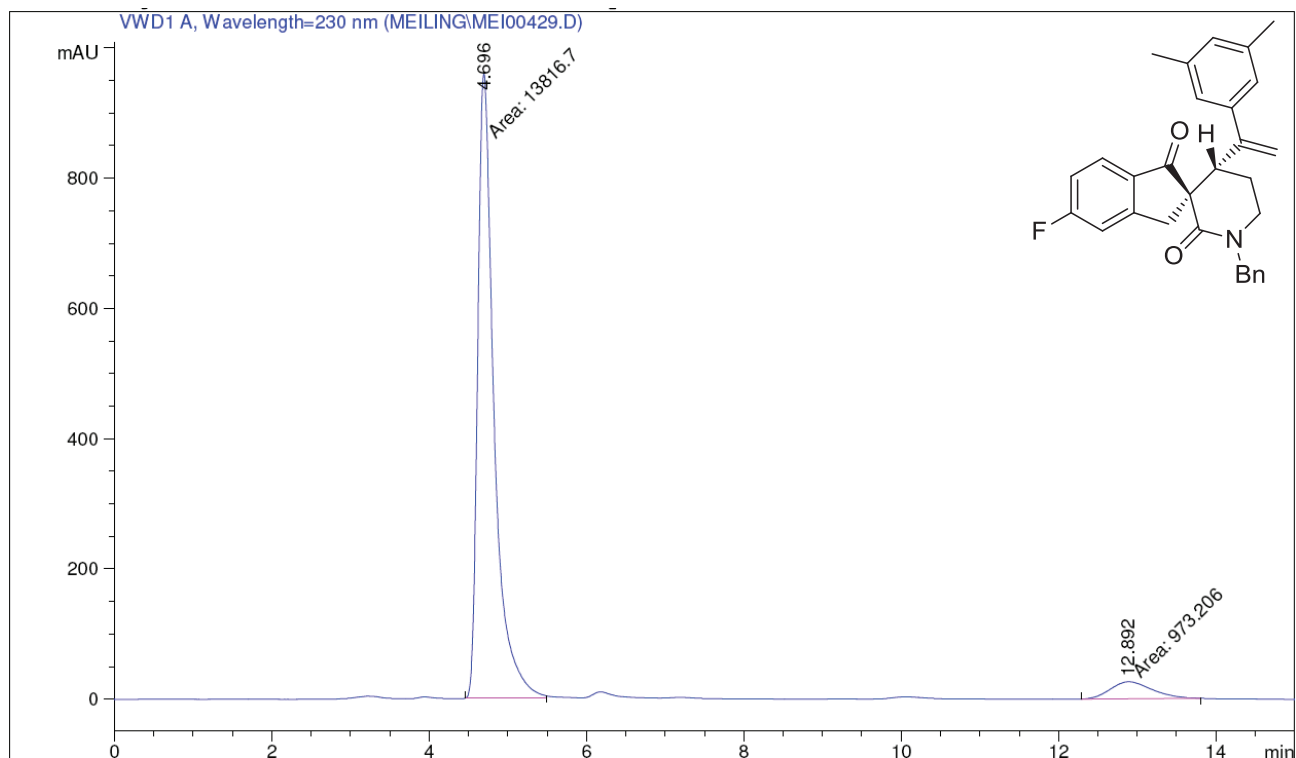

=====  
Area Percent Report  
=====

Sorted By : Signal  
Multiplier : 1.0000  
Dilution : 1.0000  
Use Multiplier & Dilution Factor with ISTDs

Signal 1: VWD1 A, Wavelength=230 nm

| Peak # | RetTime [min] | Type | Width [min] | Area [mAU*s] | Height [mAU] | Area %  |
|--------|---------------|------|-------------|--------------|--------------|---------|
| 1      | 4.696         | MM   | 0.2402      | 1.38167e4    | 958.80286    | 93.4198 |
| 2      | 12.892        | MM   | 0.6201      | 973.20599    | 26.15772     | 6.5802  |

Totals : 1.47899e4 984.96058

Results obtained with enhanced integrator!

=====  
\*\*\* End of Report \*\*\*

$^1\text{H}$  NMR spectrum of **4e**

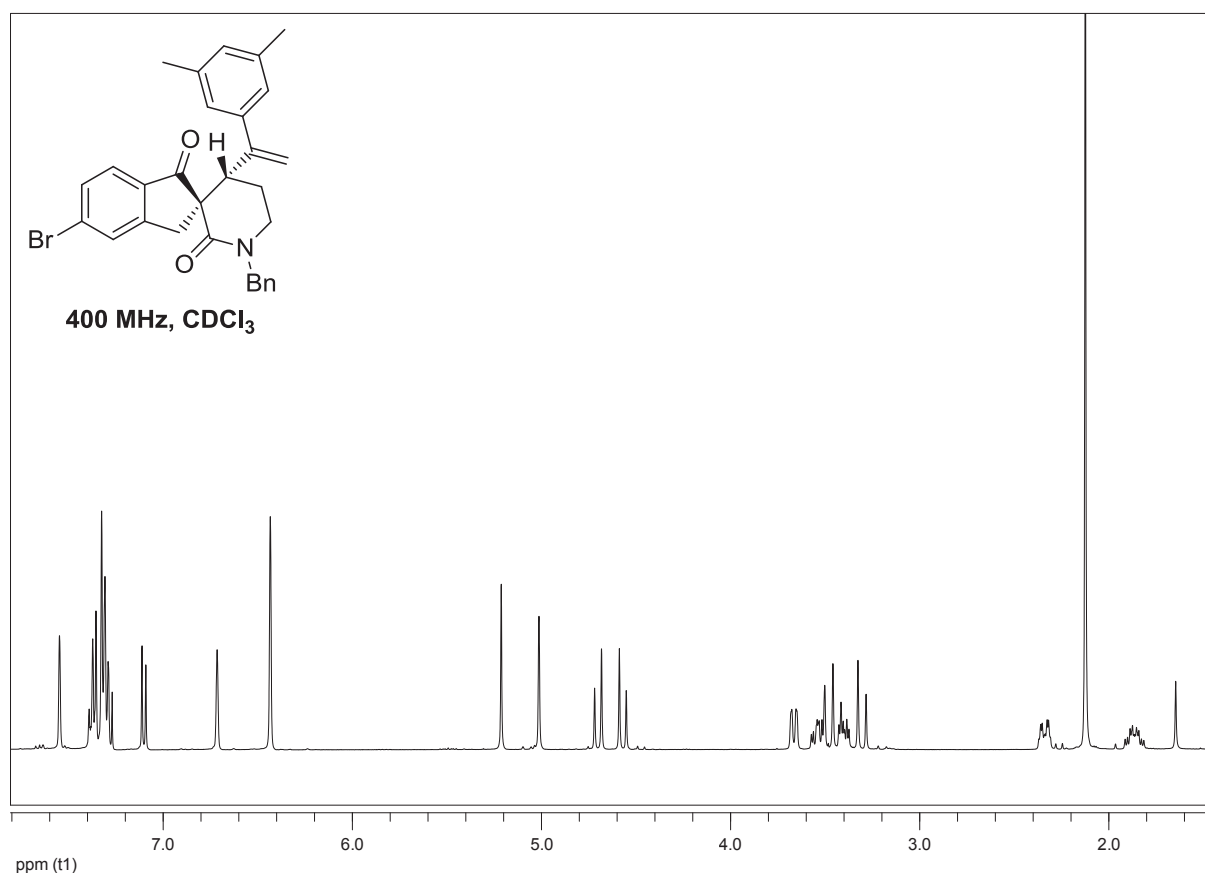

$^{13}\text{C}$  NMR spectrum of **4e**

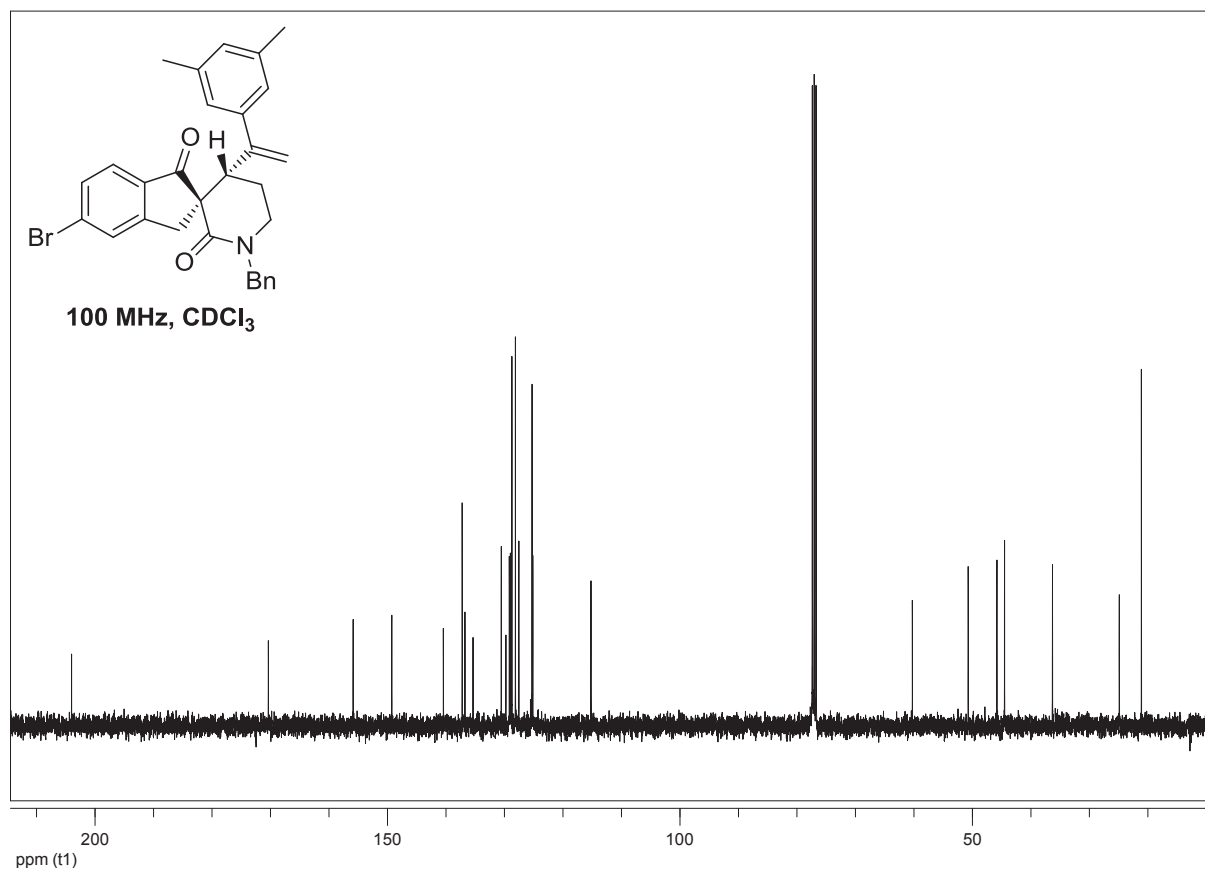

4e HPLC: Chiralcel AD; hexane/isopropanol 60:40; 1.0 mL/min

Racemic: Mixture of 2 diastereomers

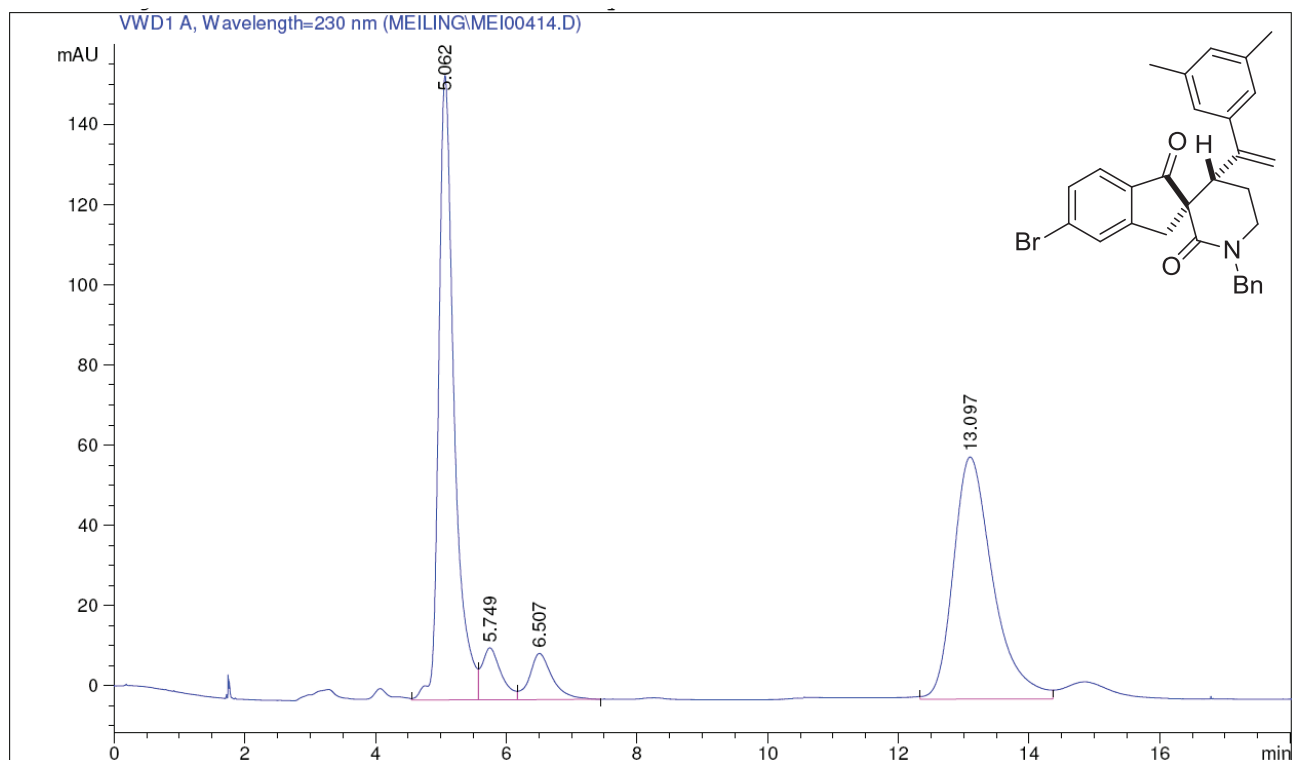

=====  
Area Percent Report  
=====

Sorted By : Signal  
Multiplier : 1.0000  
Dilution : 1.0000  
Use Multiplier & Dilution Factor with ISTDs

Signal 1: VWD1 A, Wavelength=230 nm

| Peak # | RetTime [min] | Type | Width [min] | Area [mAU*s] | Height [mAU] | Area %  |
|--------|---------------|------|-------------|--------------|--------------|---------|
| 1      | 5.062         | VV   | 0.2464      | 2566.47437   | 155.62262    | 45.4135 |
| 2      | 5.749         | VV   | 0.2981      | 266.49860    | 12.95062     | 4.7157  |
| 3      | 6.507         | VB   | 0.3498      | 279.47913    | 11.49050     | 4.9454  |
| 4      | 13.097        | VV   | 0.6347      | 2538.89648   | 60.35764     | 44.9255 |

Totals : 5651.34857 240.42137

Results obtained with enhanced integrator!

=====  
\*\*\* End of Report \*\*\*

4e HPLC: Chiralcel AD; hexane/isopropanol 60:40; 1.0 mL/min

Enantioenriched

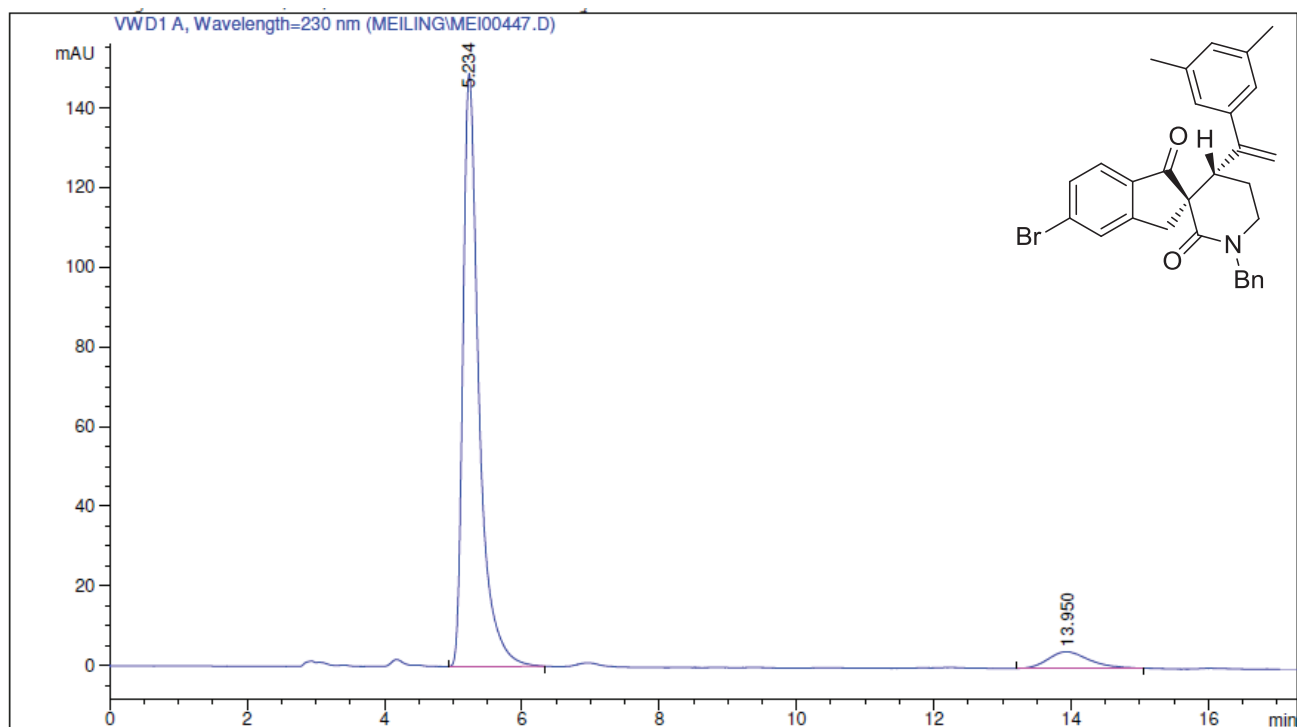

=====  
Area Percent Report  
=====

Sorted By : Signal  
Multiplier : 1.0000  
Dilution : 1.0000  
Use Multiplier & Dilution Factor with ISTDs

Signal 1: VWD1 A, Wavelength=230 nm

| Peak # | RetTime [min] | Type | Width [min] | Area [mAU*s] | Height [mAU] | Area %  |
|--------|---------------|------|-------------|--------------|--------------|---------|
| 1      | 5.234         | BB   | 0.2404      | 2402.33911   | 148.78294    | 93.0042 |
| 2      | 13.950        | PV   | 0.5057      | 180.70349    | 4.21924      | 6.9958  |

Totals : 2583.04260 153.00218



$^1\text{H}$  NMR spectrum of **4f**

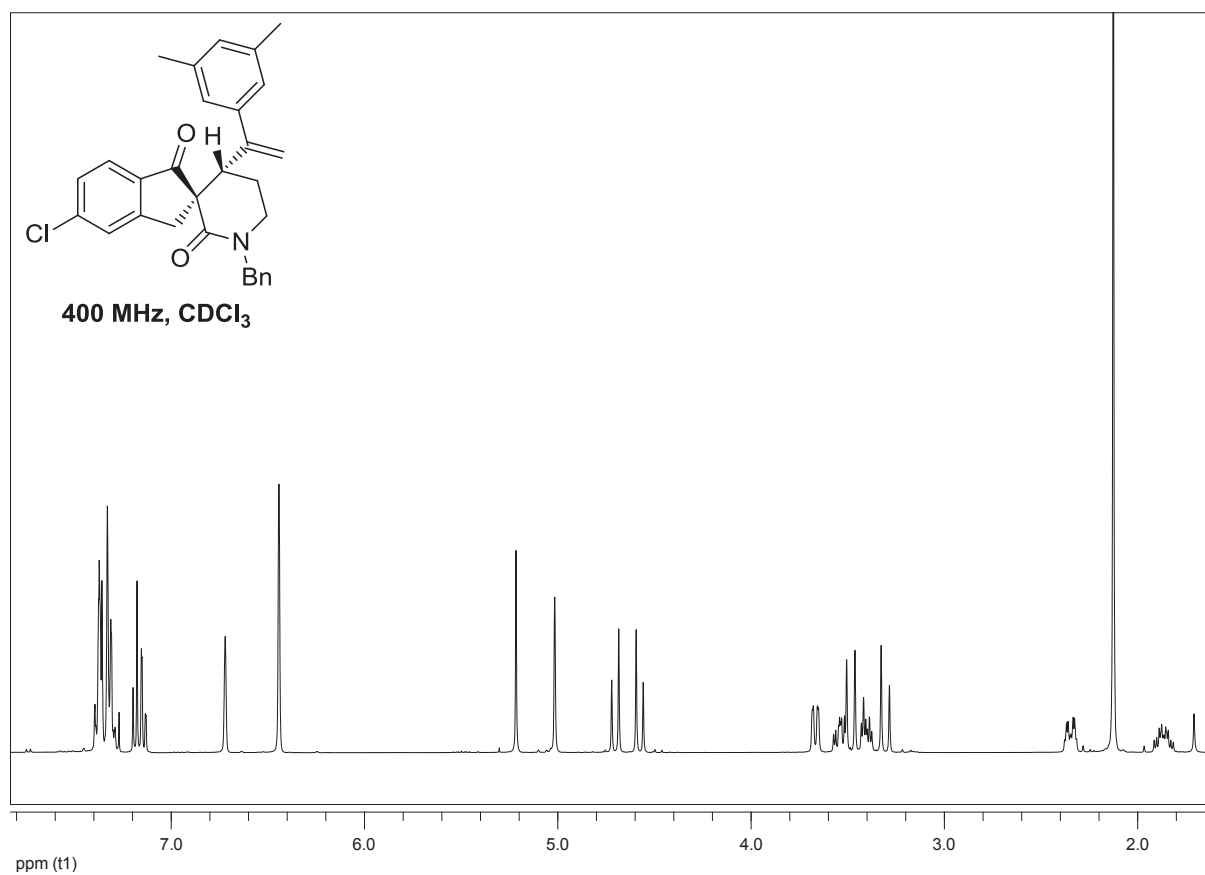

$^{13}\text{C}$  NMR spectrum of **4f**

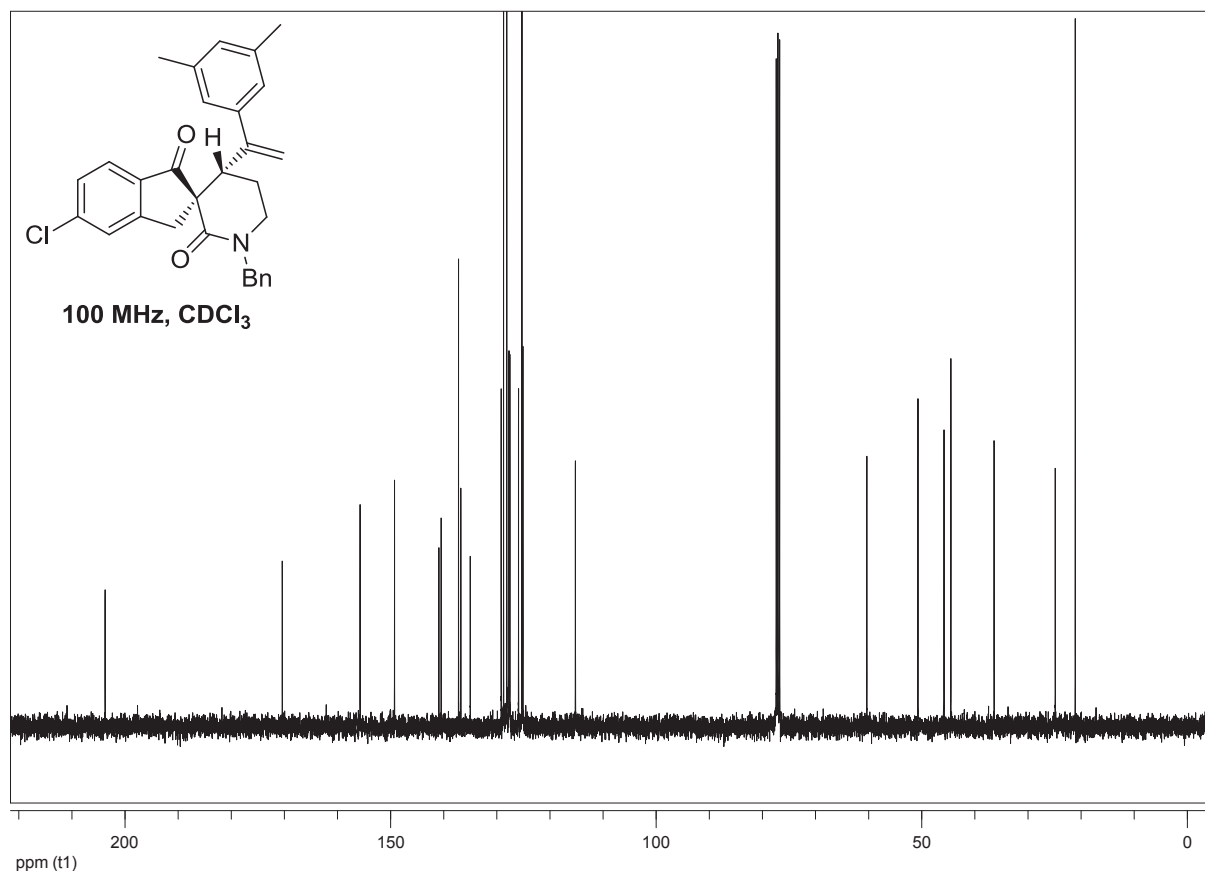

4f HPLC: Chiralcel AD; hexane/isopropanol 60:40; 1.0 mL/min

Racemic: Mixture of 2 diastereomers

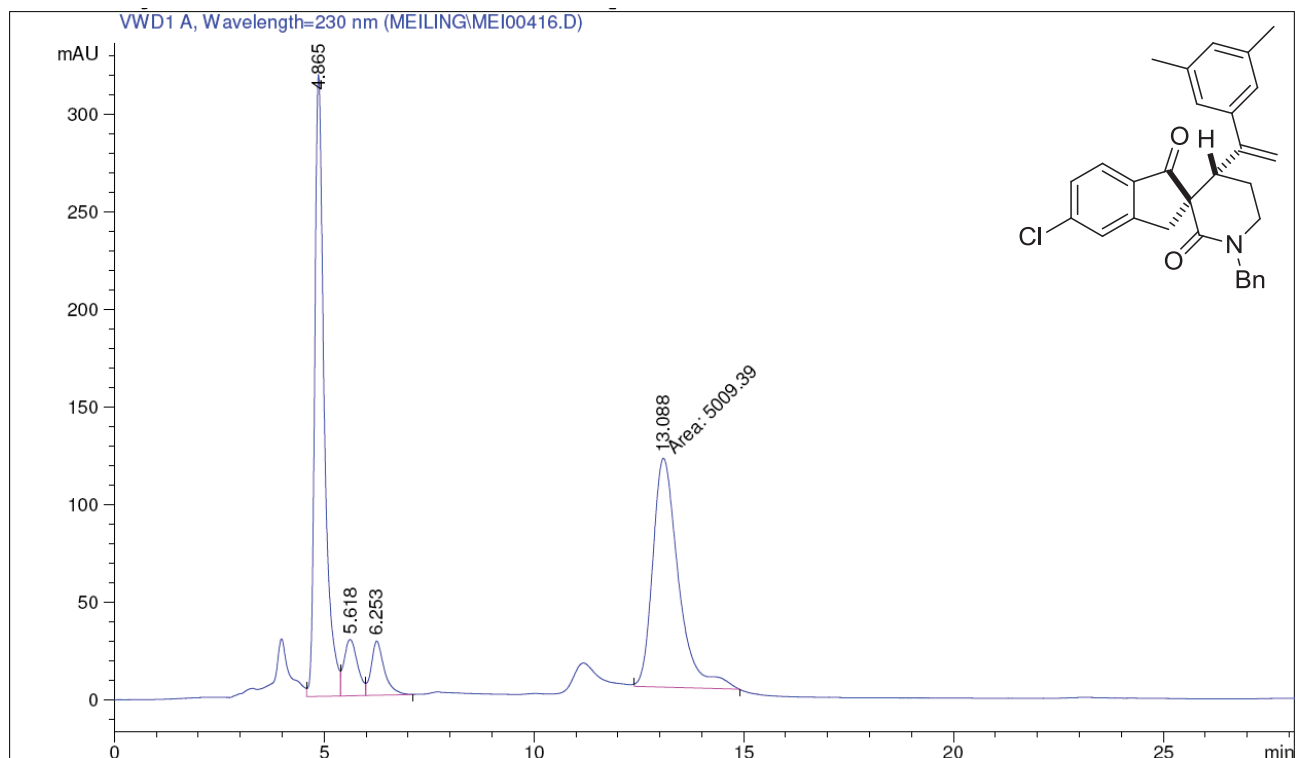

=====  
Area Percent Report  
=====

Sorted By : Signal  
Multiplier : 1.0000  
Dilution : 1.0000  
Use Multiplier & Dilution Factor with ISTDs

Signal 1: VWD1 A, Wavelength=230 nm

| Peak # | RetTime [min] | Type | Width [min] | Area [mAU*s] | Height [mAU] | Area %  |
|--------|---------------|------|-------------|--------------|--------------|---------|
| 1      | 4.865         | VV   | 0.2370      | 5050.77832   | 318.48273    | 44.5748 |
| 2      | 5.618         | VV   | 0.3493      | 662.00482    | 28.89533     | 5.8424  |
| 3      | 6.253         | VB   | 0.3212      | 608.84778    | 27.83079     | 5.3733  |
| 4      | 13.088        | MM   | 0.7114      | 5009.39160   | 117.35179    | 44.2095 |

Totals : 1.13310e4 492.56063

Results obtained with enhanced integrator!

=====  
\*\*\* End of Report \*\*\*

4f HPLC: Chiralcel AD; hexane/isopropanol 60:40; 1.0 mL/min

Enantioenriched

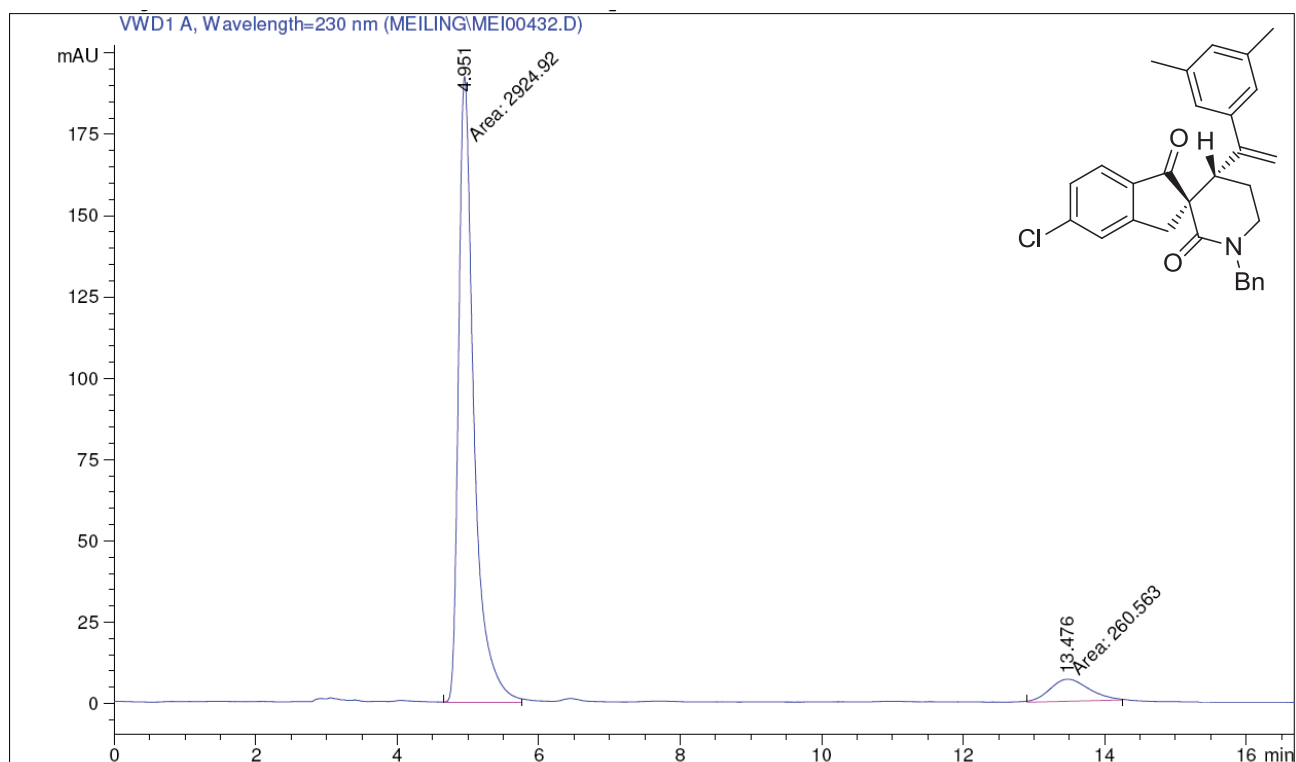

=====  
Area Percent Report  
=====

Sorted By : Signal  
Multiplier : 1.0000  
Dilution : 1.0000  
Use Multiplier & Dilution Factor with ISTDs

Signal 1: VWD1 A, Wavelength=230 nm

| Peak # | RetTime [min] | Type | Width [min] | Area [mAU*s] | Height [mAU] | Area %  |
|--------|---------------|------|-------------|--------------|--------------|---------|
| 1      | 4.951         | MM   | 0.2531      | 2924.92310   | 192.59633    | 91.8203 |
| 2      | 13.476        | MM   | 0.6384      | 260.56314    | 6.80290      | 8.1797  |

Totals : 3185.48624 199.39922

Results obtained with enhanced integrator!

=====  
\*\*\* End of Report \*\*\*

$^1\text{H}$  NMR spectrum of **4g**

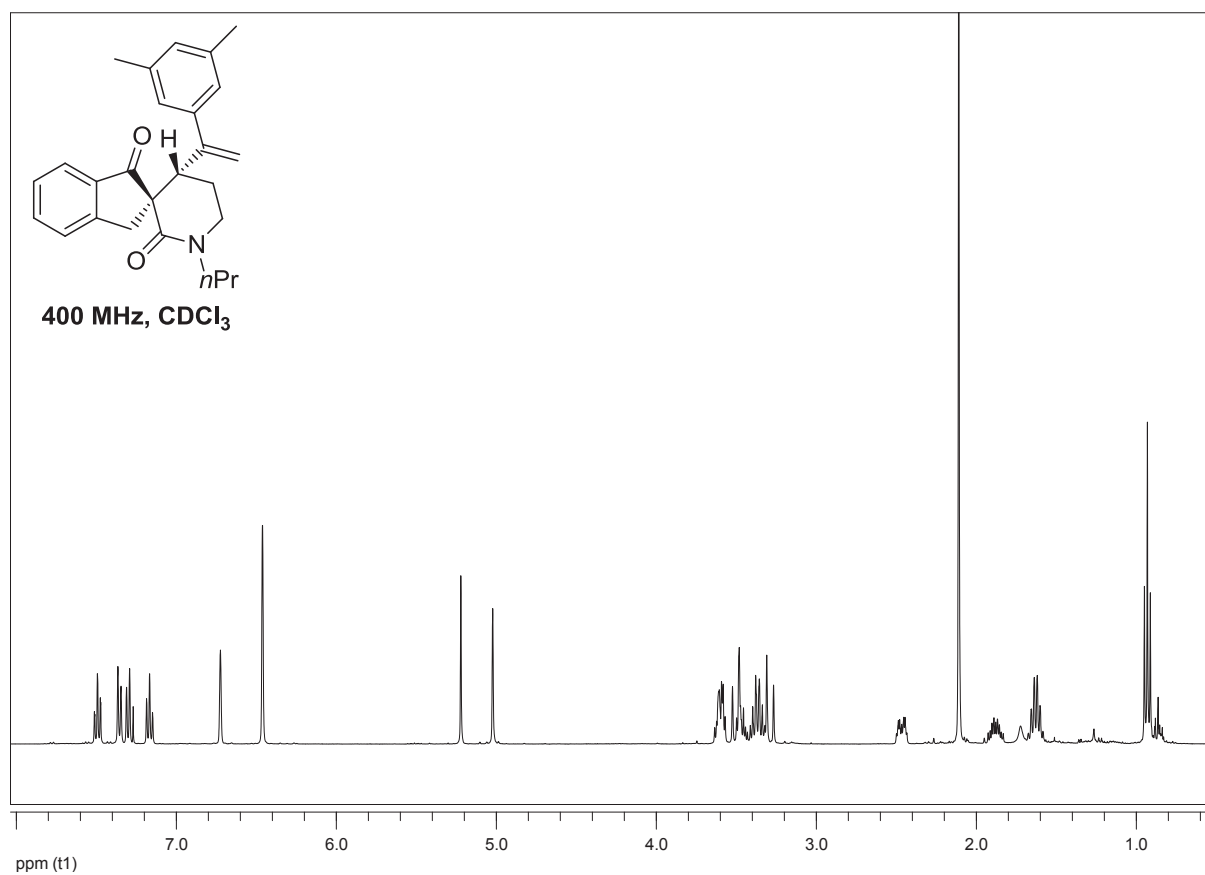

$^{13}\text{C}$  NMR spectrum of **4g**

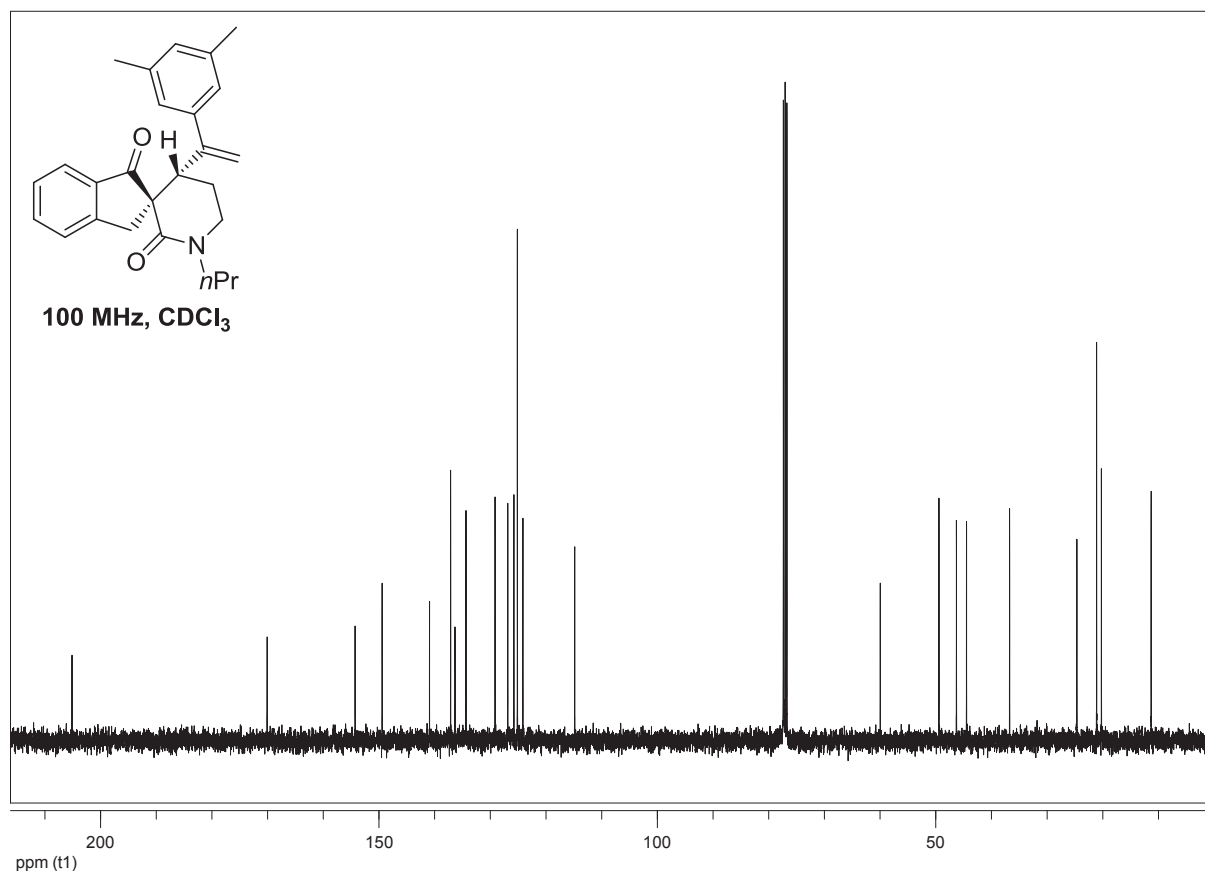

**4g** HPLC: Chiralcel AD; hexane/isopropanol 60:40; 1.0 mL/min

Racemic

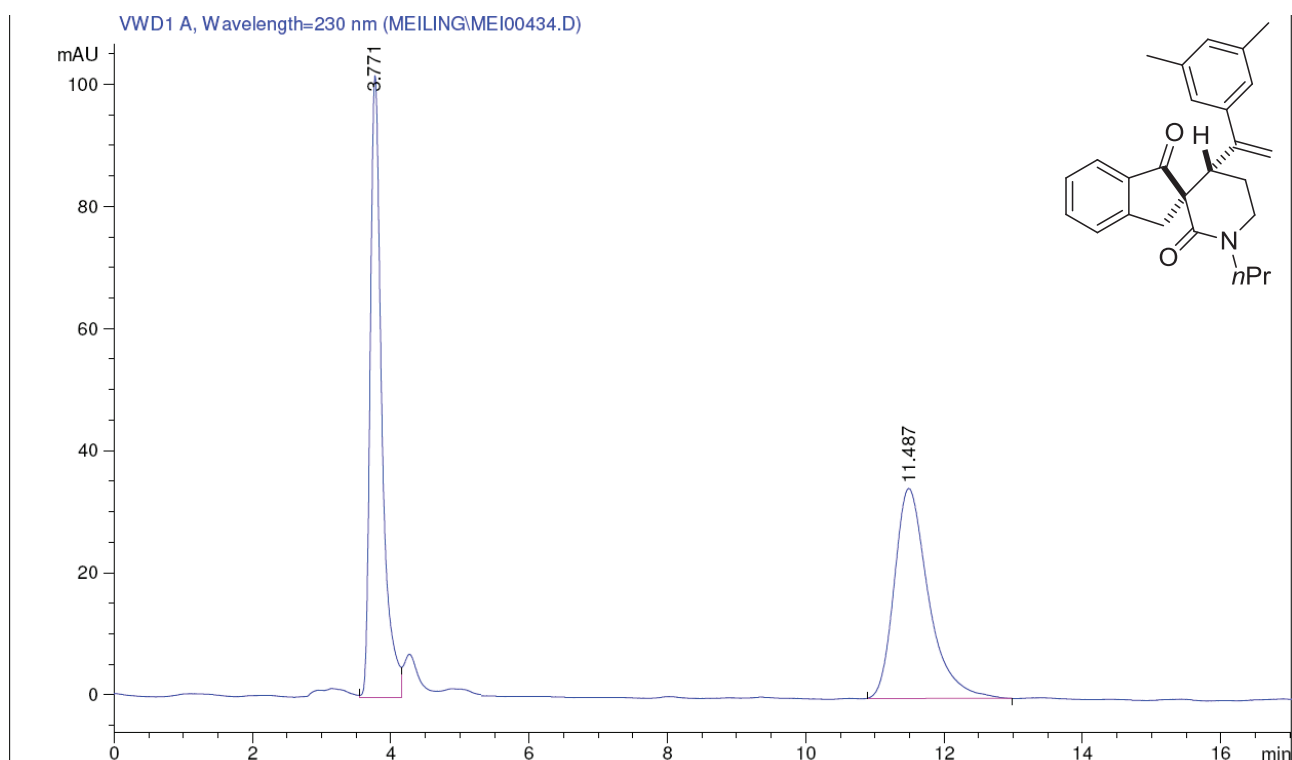

=====  
Area Percent Report  
=====

Sorted By : Signal  
Multiplier : 1.0000  
Dilution : 1.0000  
Use Multiplier & Dilution Factor with ISTDs

Signal 1: VWD1 A, Wavelength=230 nm

| Peak # | RetTime [min] | Type | Width [min] | Area [mAU*s] | Height [mAU] | Area %  |
|--------|---------------|------|-------------|--------------|--------------|---------|
| 1      | 3.771         | VV   | 0.1764      | 1189.15588   | 101.73064    | 50.1467 |
| 2      | 11.487        | BP   | 0.5171      | 1182.19604   | 34.38982     | 49.8533 |

Totals : 2371.35193 136.12046

Results obtained with enhanced integrator!

=====  
\*\*\* End of Report \*\*\*

4g HPLC: Chiralcel AD; hexane/isopropanol 60:40; 1.0 mL/min

Enantioenriched

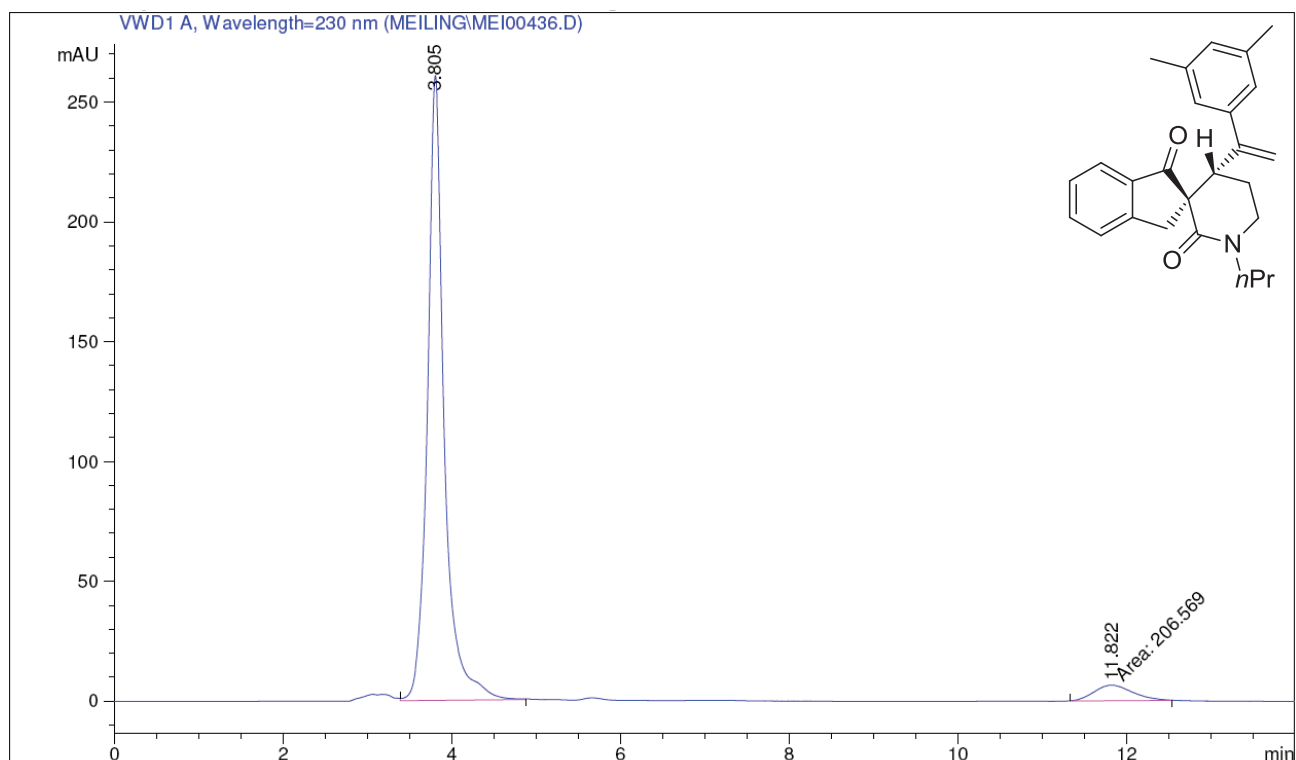

=====  
Area Percent Report  
=====

Sorted By : Signal  
Multiplier : 1.0000  
Dilution : 1.0000  
Use Multiplier & Dilution Factor with ISTDs

Signal 1: VWD1 A, Wavelength=230 nm

| Peak # | RetTime [min] | Type | Width [min] | Area [mAU*s] | Height [mAU] | Area %  |
|--------|---------------|------|-------------|--------------|--------------|---------|
| 1      | 3.805         | VB   | 0.2018      | 3616.96313   | 260.76331    | 94.5974 |
| 2      | 11.822        | MM   | 0.5320      | 206.56888    | 6.47171      | 5.4026  |

Totals : 3823.53201 267.23502

Results obtained with enhanced integrator!

=====  
\*\*\* End of Report \*\*\*

$^1\text{H}$  NMR spectrum of **4h**

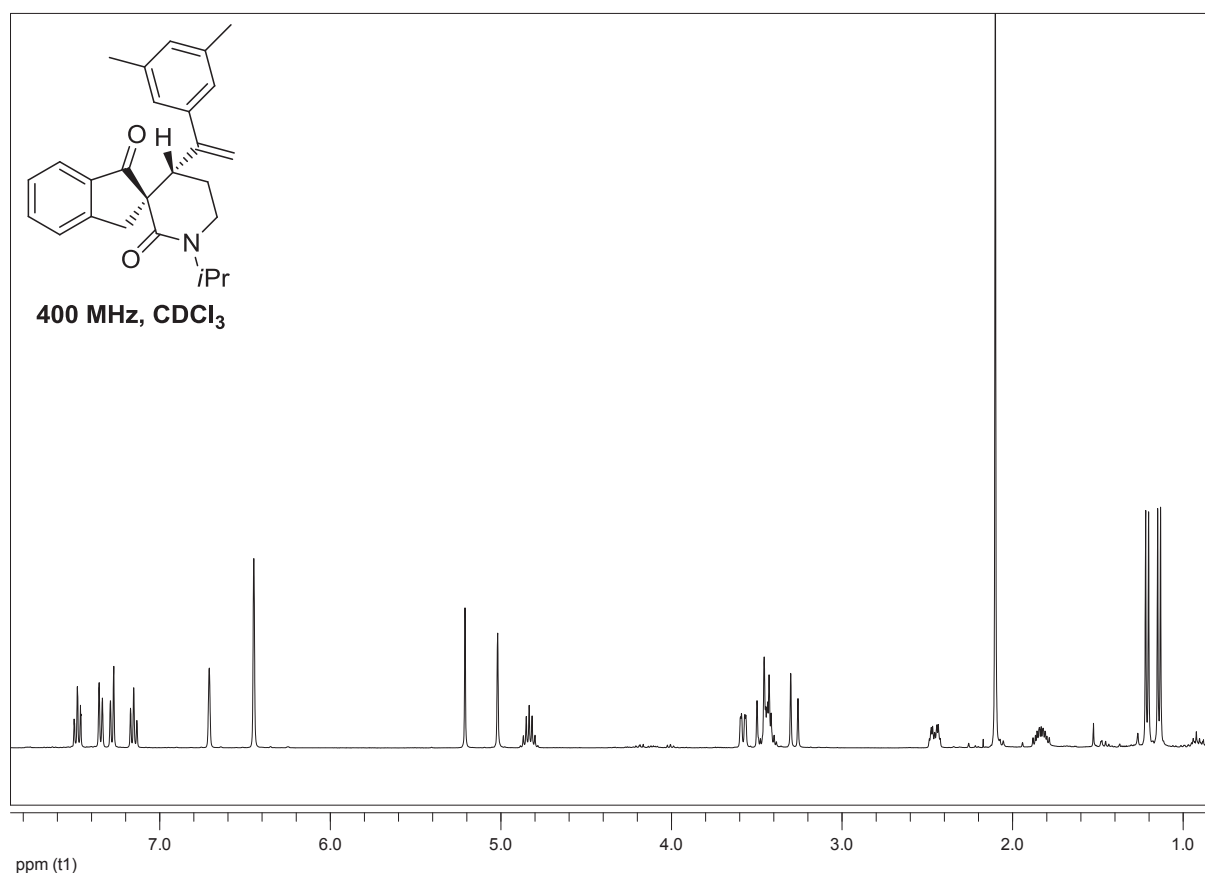

$^{13}\text{C}$  NMR spectrum of **4h**

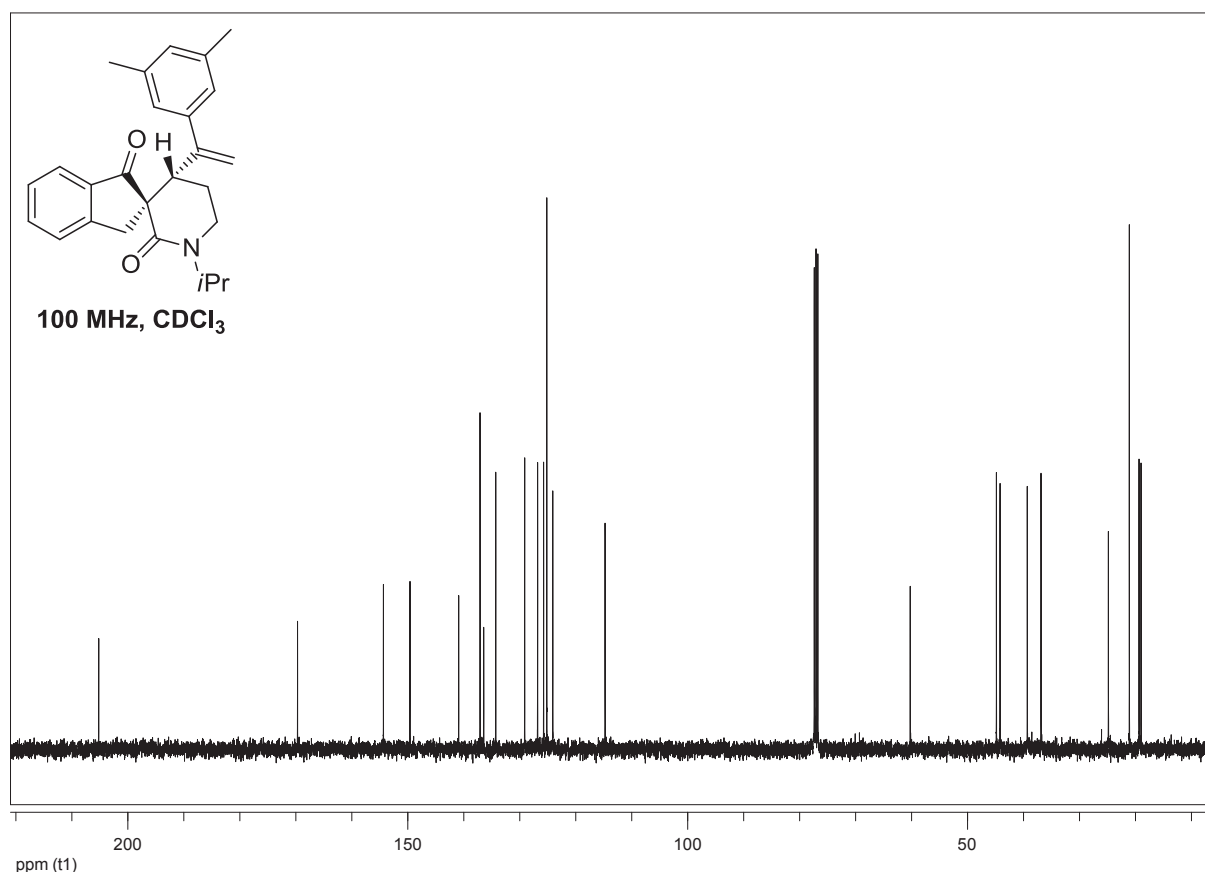

**4h** HPLC: Chiralcel AD; hexane/isopropanol 60:40; 1.0 mL/min

Racemic

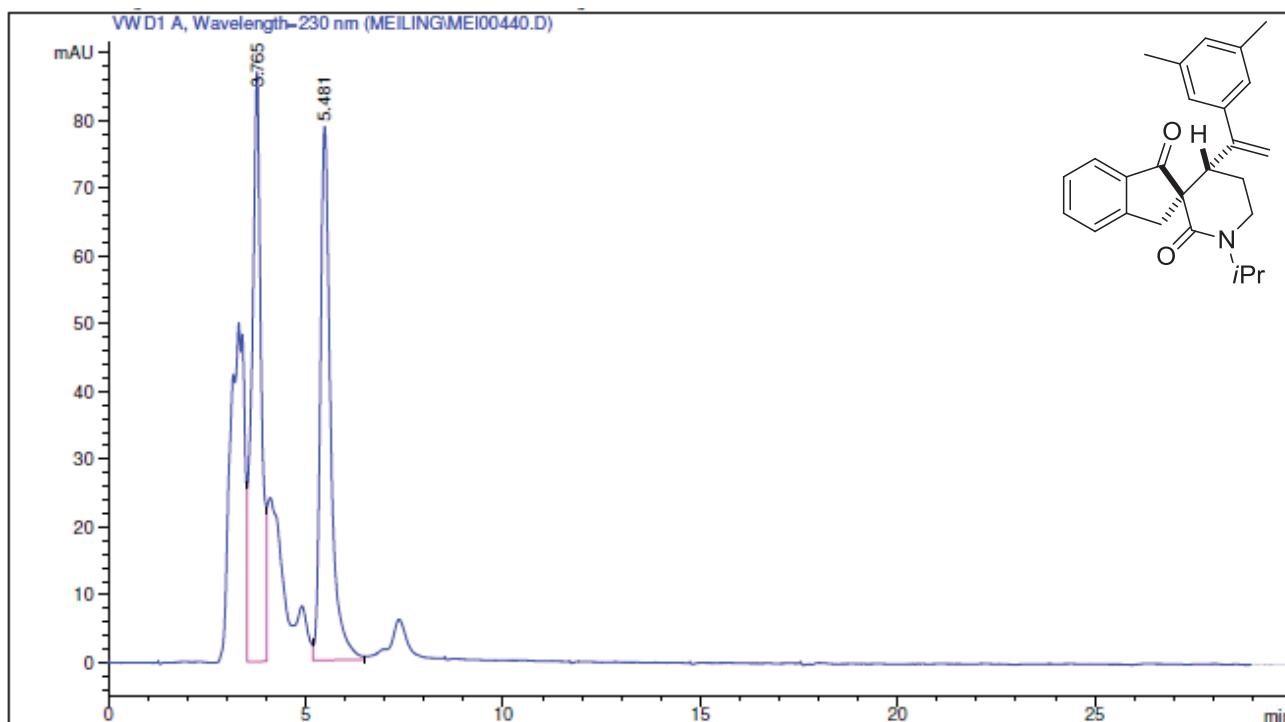

-----  
Area Percent Report  
-----

Sorted By : Signal  
Multiplier : 1.0000  
Dilution : 1.0000  
Use Multiplier & Dilution Factor with ISTDs

Signal 1: VWD1 A, Wavelength-230 nm

| Peak # | RetTime [min] | Type | Width [min] | Area [mAU*s] | Height [mAU] | Area %  |
|--------|---------------|------|-------------|--------------|--------------|---------|
| 1      | 3.765         | VV   | 0.2284      | 1428.35999   | 87.07842     | 49.9523 |
| 2      | 5.481         | VB   | 0.2709      | 1431.08606   | 78.79088     | 50.0477 |

Totals : 2859.44604 165.86930

Results obtained with enhanced integrator!

-----  
\*\*\* End of Report \*\*\*



4h HPLC: Chiralcel AD; hexane/isopropanol 60:40; 1.0 mL/min

Enantioenriched

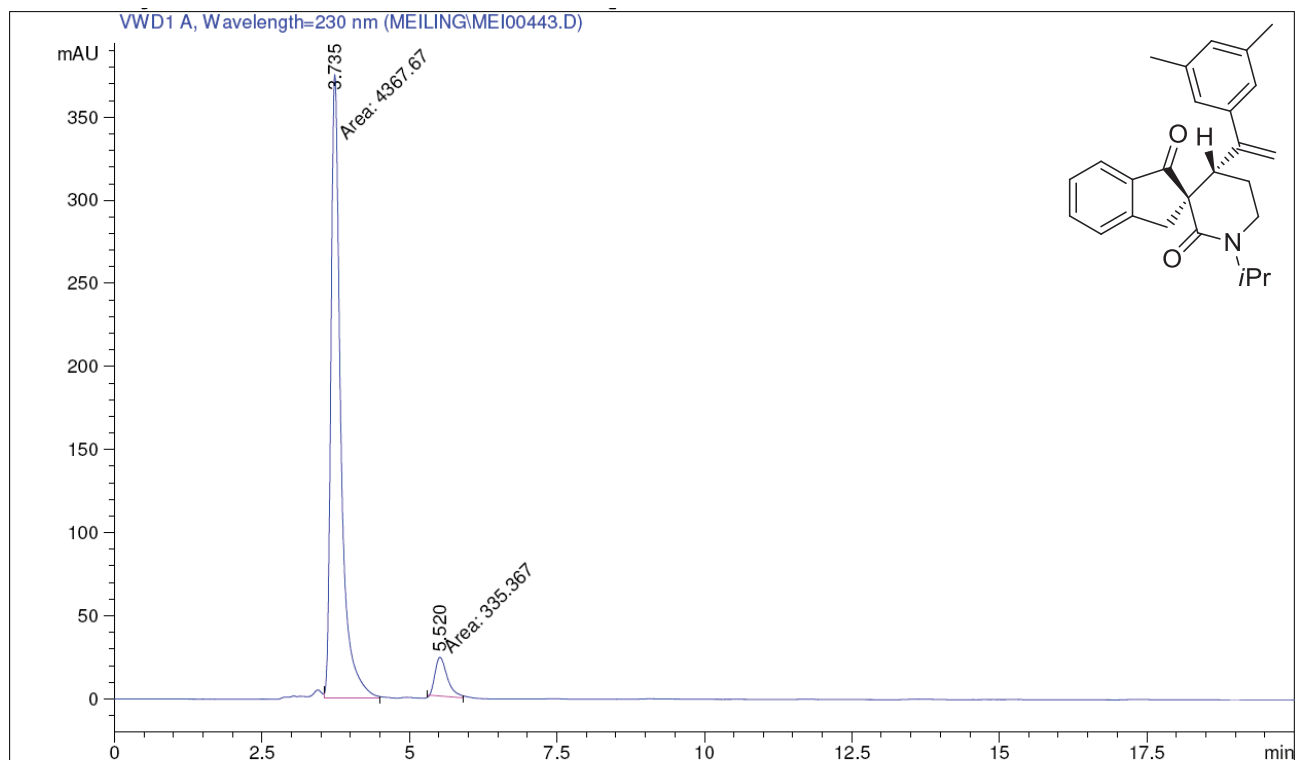

=====  
Area Percent Report  
=====

Sorted By : Signal  
Multiplier : 1.0000  
Dilution : 1.0000  
Use Multiplier & Dilution Factor with ISTDs

Signal 1: VWD1 A, Wavelength=230 nm

| Peak # | RetTime [min] | Type | Width [min] | Area [mAU*s] | Height [mAU] | Area %  |
|--------|---------------|------|-------------|--------------|--------------|---------|
| 1      | 3.735         | MM   | 0.1940      | 4367.67285   | 375.19400    | 92.8691 |
| 2      | 5.520         | MM   | 0.2403      | 335.36673    | 23.25805     | 7.1309  |

Totals : 4703.03958 398.45205

Results obtained with enhanced integrator!

=====  
\*\*\* End of Report \*\*\*

$^1\text{H}$  NMR spectrum of **4i**

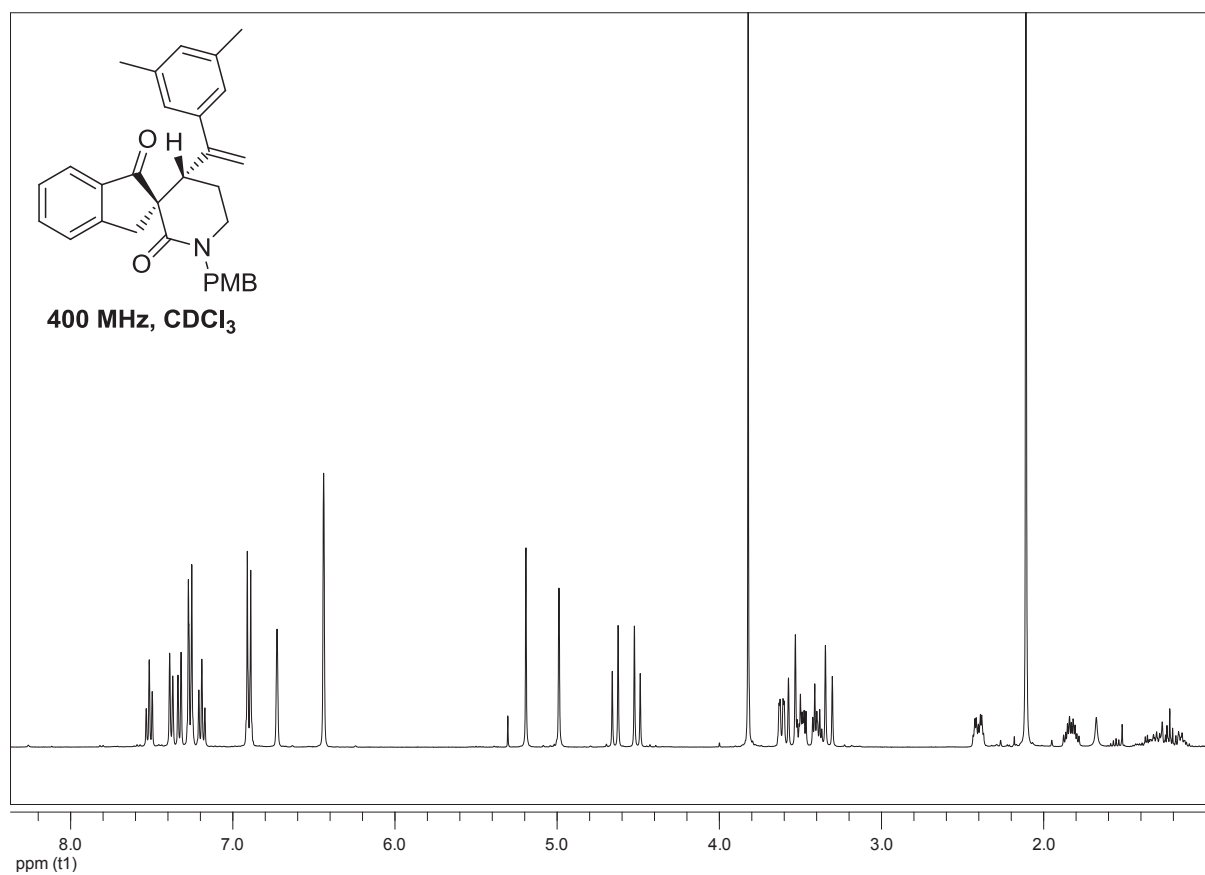

$^{13}\text{C}$  NMR spectrum of **4i**

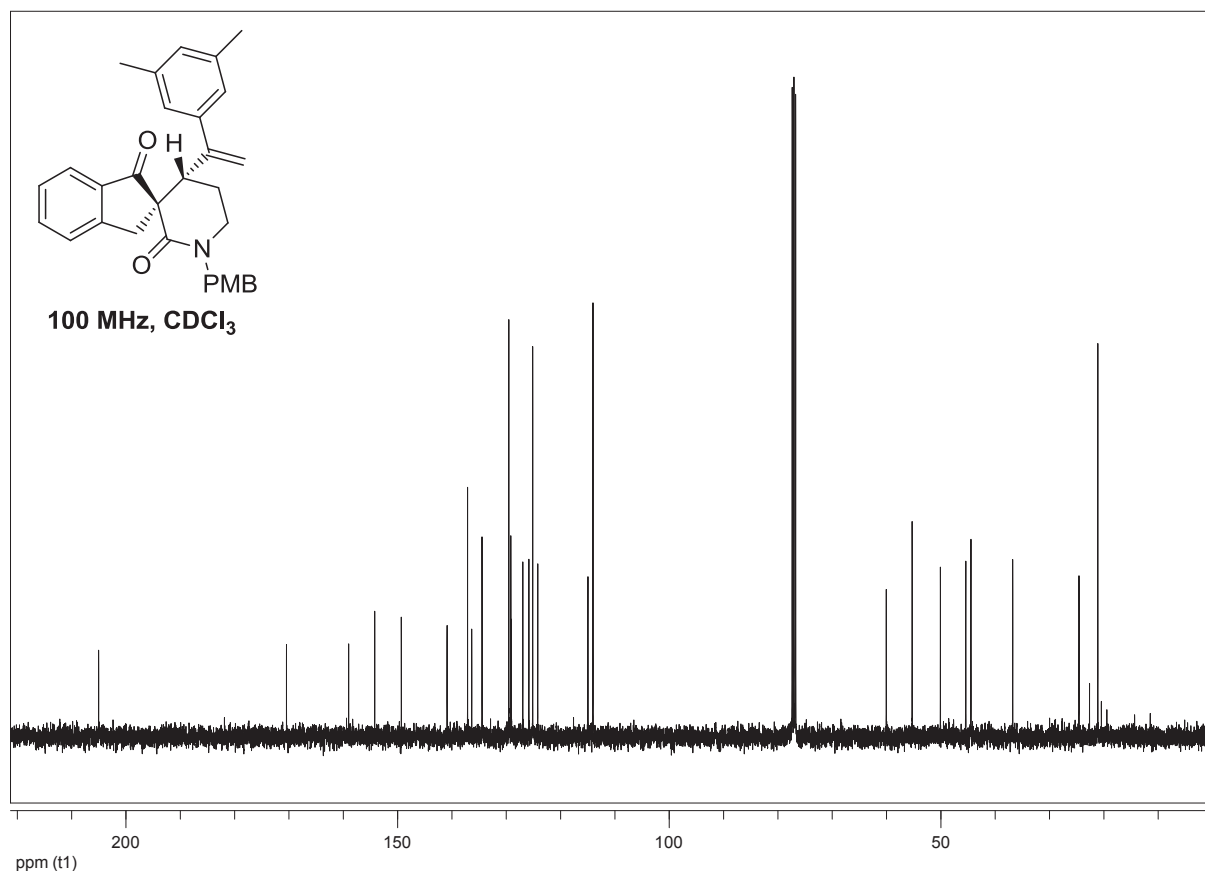

4i HPLC: Chiralcel AD; hexane/isopropanol 60:40; 1.0 mL/min

Racemic

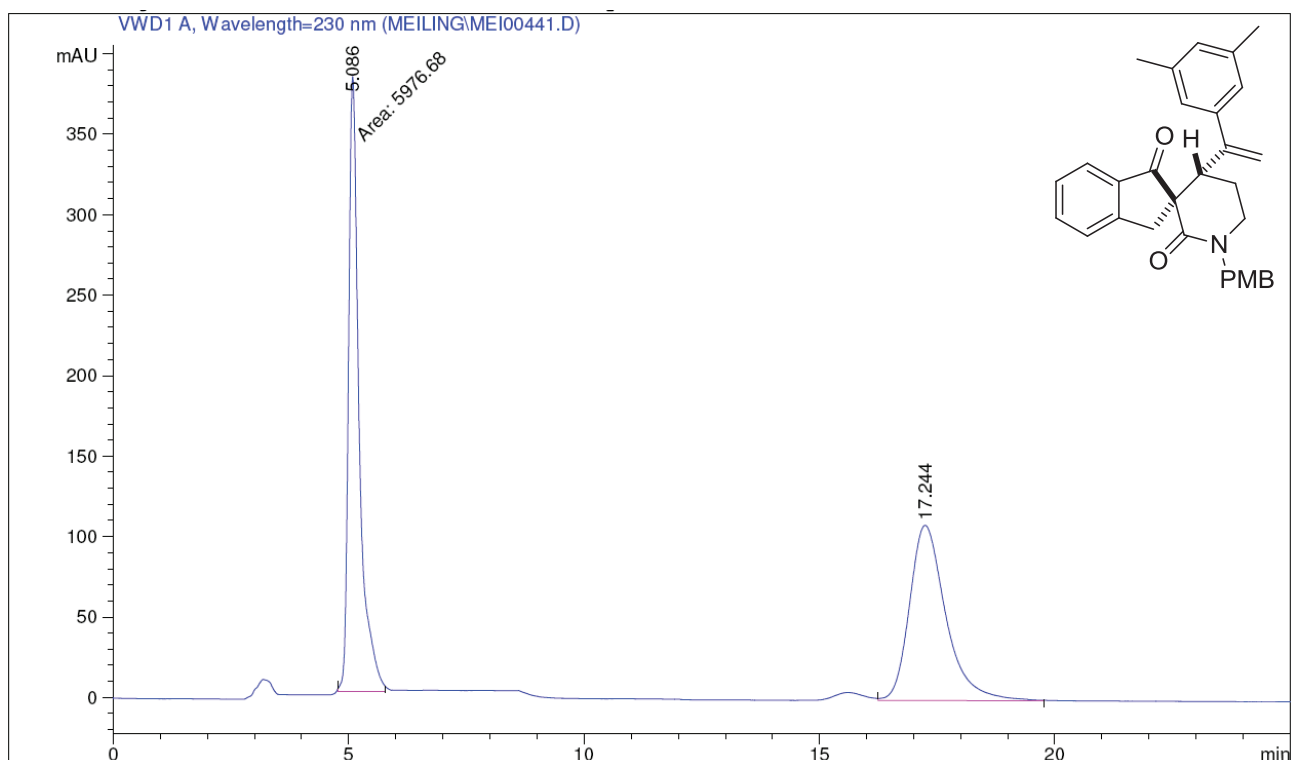

=====  
Area Percent Report  
=====

Sorted By : Signal  
Multiplier : 1.0000  
Dilution : 1.0000  
Use Multiplier & Dilution Factor with ISTDs

Signal 1: VWD1 A, Wavelength=230 nm

| Peak # | RetTime [min] | Type | Width [min] | Area [mAU*s] | Height [mAU] | Area %  |
|--------|---------------|------|-------------|--------------|--------------|---------|
| 1      | 5.086         | MM   | 0.2608      | 5976.67676   | 381.91660    | 50.6011 |
| 2      | 17.244        | VB   | 0.8135      | 5834.68750   | 108.81854    | 49.3989 |

Totals : 1.18114e4 490.73514

Results obtained with enhanced integrator!

=====  
\*\*\* End of Report \*\*\*

4i HPLC: Chiralcel AD; hexane/isopropanol 60:40; 1.0 mL/min

Enantioenriched

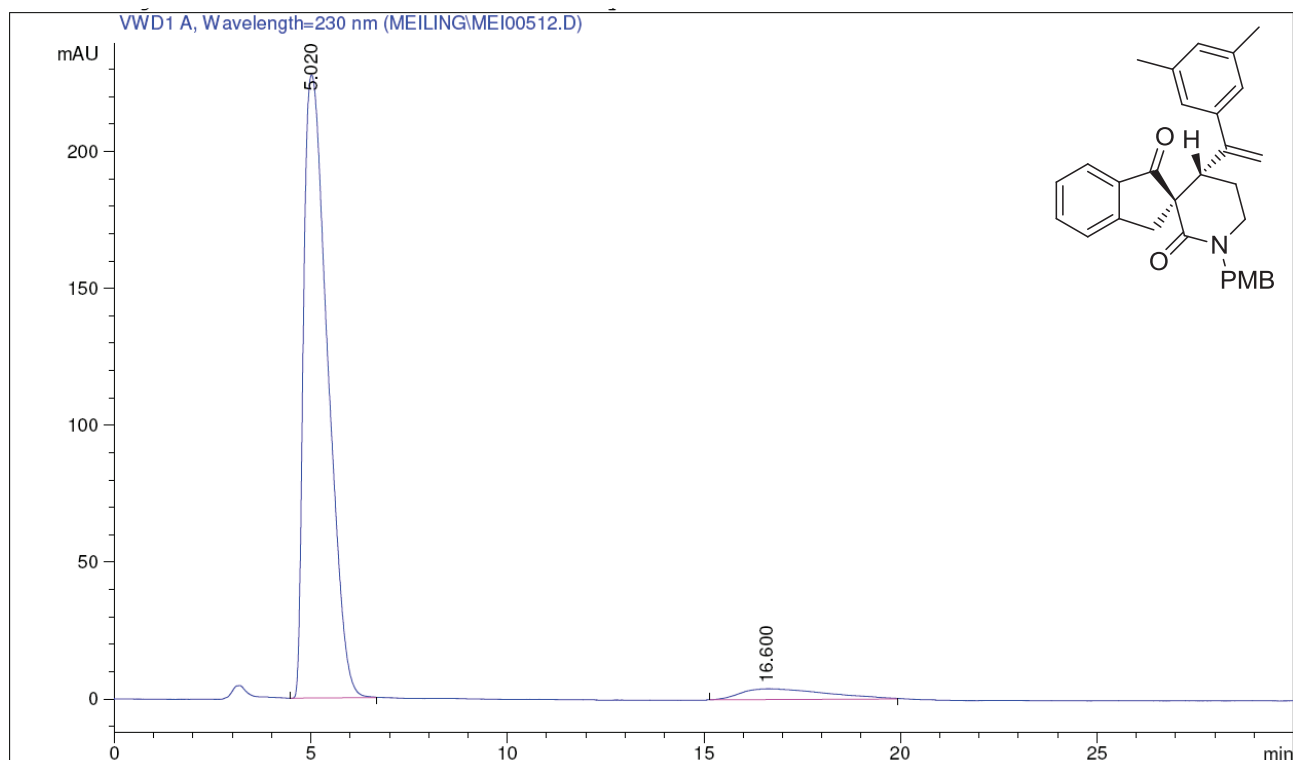

=====  
Area Percent Report  
=====

Sorted By : Signal  
Multiplier : 1.0000  
Dilution : 1.0000  
Use Multiplier & Dilution Factor with ISTDs

Signal 1: VWD1 A, Wavelength=230 nm

| Peak # | RetTime [min] | Type | Width [min] | Area [mAU*s] | Height [mAU] | Area %  |
|--------|---------------|------|-------------|--------------|--------------|---------|
| 1      | 5.020         | PB   | 0.6451      | 9619.87695   | 227.61391    | 94.0664 |
| 2      | 16.600        | BB   | 1.7918      | 606.81012    | 3.96868      | 5.9336  |

Totals : 1.02267e4 231.58259

Results obtained with enhanced integrator!

=====  
\*\*\* End of Report \*\*\*

$^1\text{H}$  NMR spectrum of **4j**

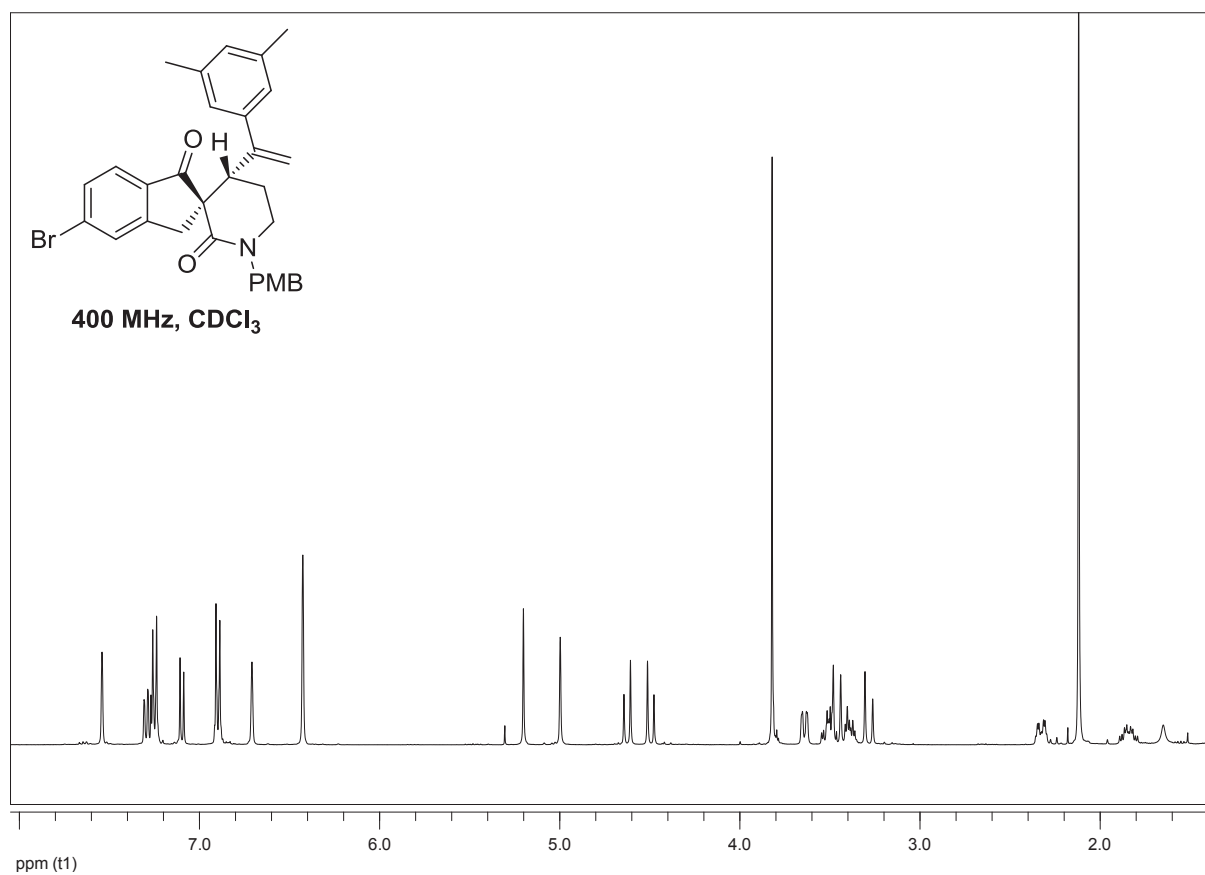

$^{13}\text{C}$  NMR spectrum of **4j**

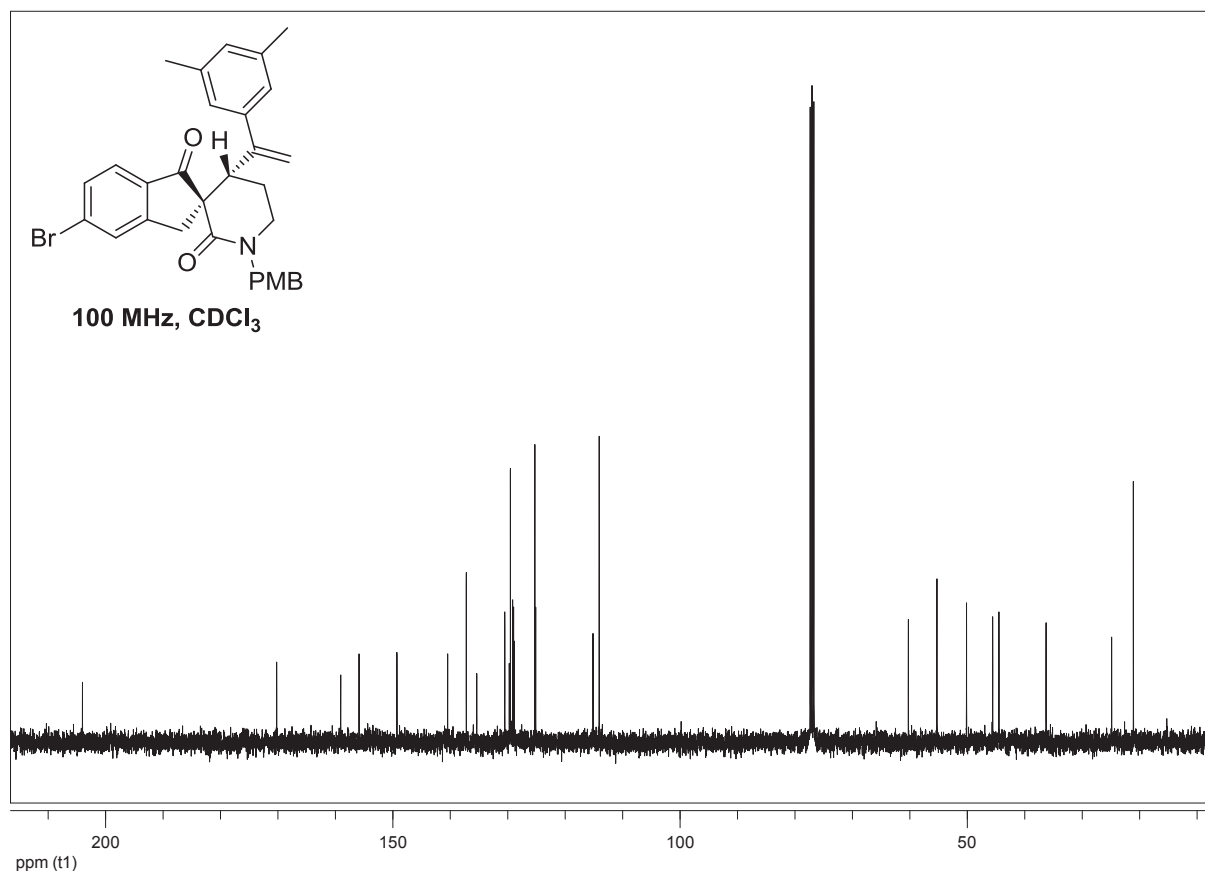

4j HPLC: Chiralcel AD; hexane/isopropanol 60:40; 1.0 mL/min

Racemic

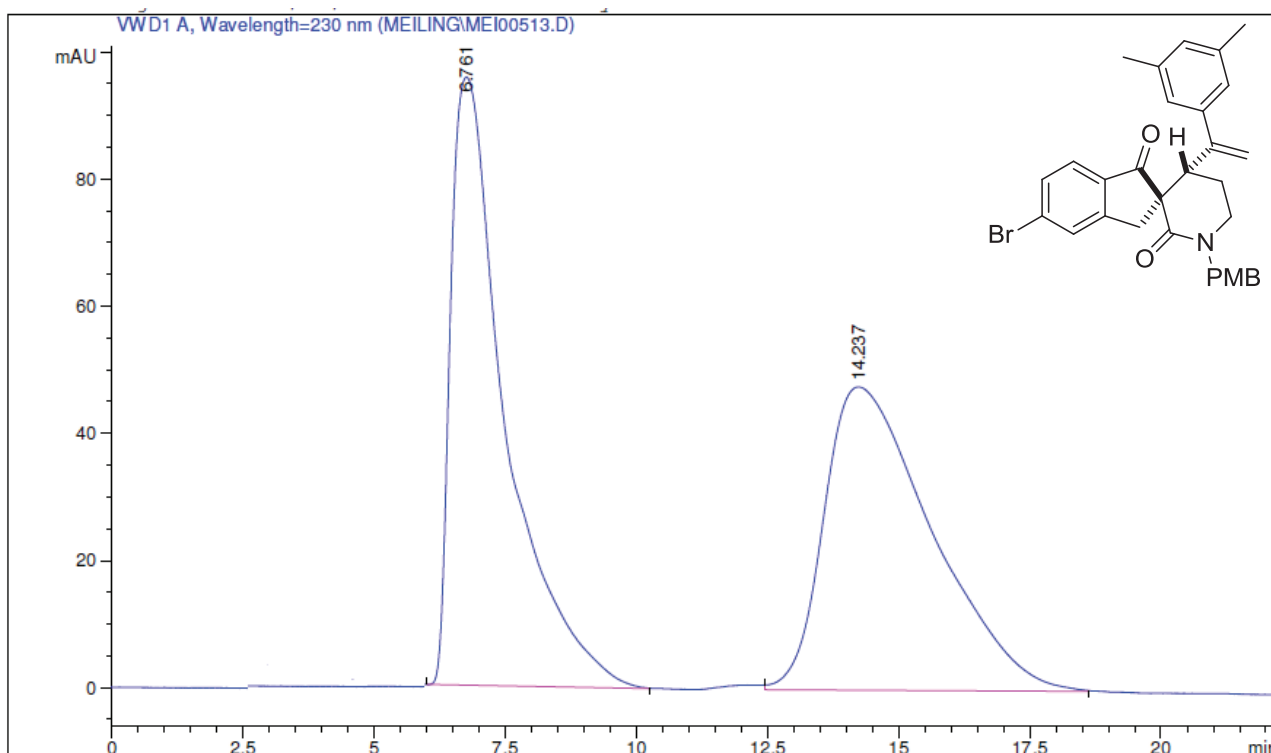

=====  
Area Percent Report  
=====

Sorted By : Signal  
Multiplier : 1.0000  
Dilution : 1.0000  
Use Multiplier & Dilution Factor with ISTDs

Signal 1: VWD1 A, Wavelength=230 nm

| Peak # | RetTime [min] | Type | Width [min] | Area [mAU*s] | Height [mAU] | Area %  |
|--------|---------------|------|-------------|--------------|--------------|---------|
| 1      | 6.761         | PB   | 1.0621      | 6939.38135   | 95.68015     | 50.4794 |
| 2      | 14.237        | BB   | 1.8914      | 6807.58057   | 47.68995     | 49.5206 |

Totals : 1.37470e4 143.37010

Results obtained with enhanced integrator!

=====  
\*\*\* End of Report \*\*\*

4j HPLC: Chiralcel AD; hexane/isopropanol 60:40; 1.0 mL/min

Enantioenriched

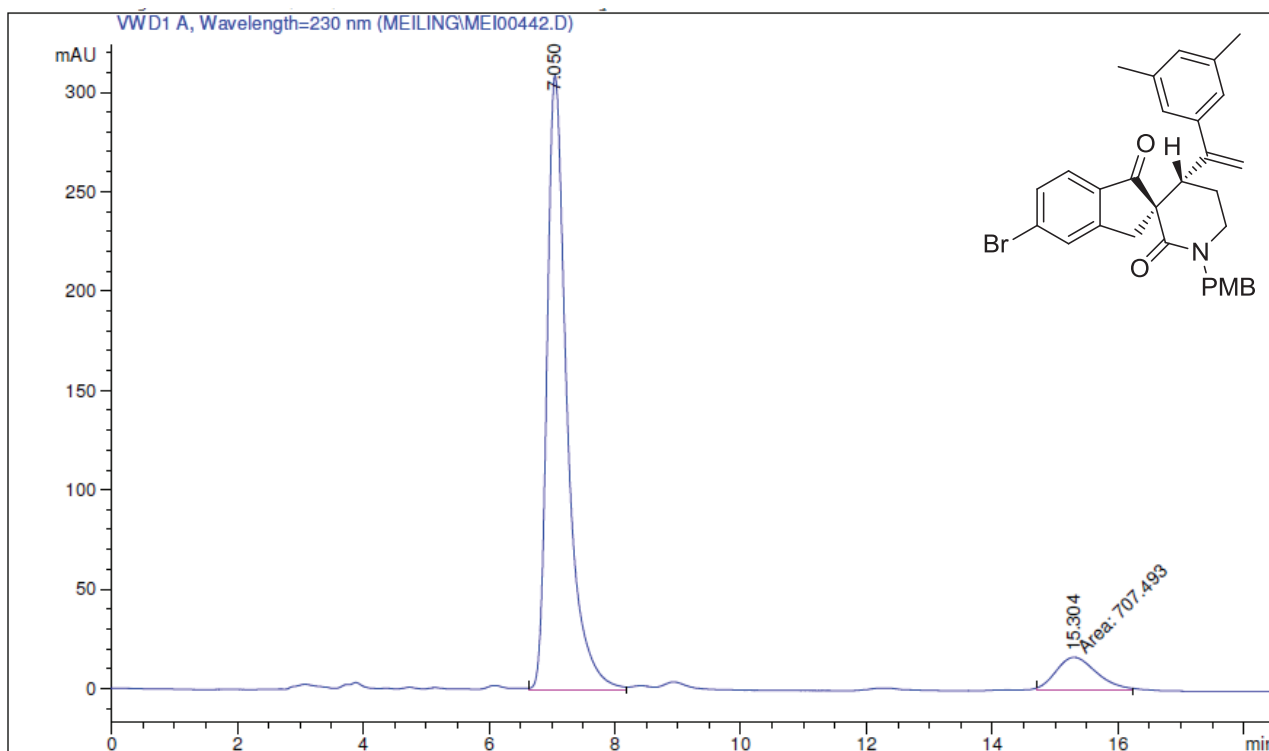

=====  
Area Percent Report  
=====

Sorted By : Signal  
Multiplier : 1.0000  
Dilution : 1.0000  
Use Multiplier & Dilution Factor with ISTDs

Signal 1: VWD1 A, Wavelength=230 nm

| Peak # | RetTime [min] | Type | Width [min] | Area [mAU*s] | Height [mAU] | Area %  |
|--------|---------------|------|-------------|--------------|--------------|---------|
| 1      | 7.050         | BV   | 0.3309      | 6807.20361   | 309.08539    | 90.5852 |
| 2      | 15.304        | MM   | 0.7316      | 707.49316    | 16.11778     | 9.4148  |

Totals : 7514.69678 325.20317

Results obtained with enhanced integrator!

=====  
\*\*\* End of Report \*\*\*

$^1\text{H}$  NMR spectrum of **4k**

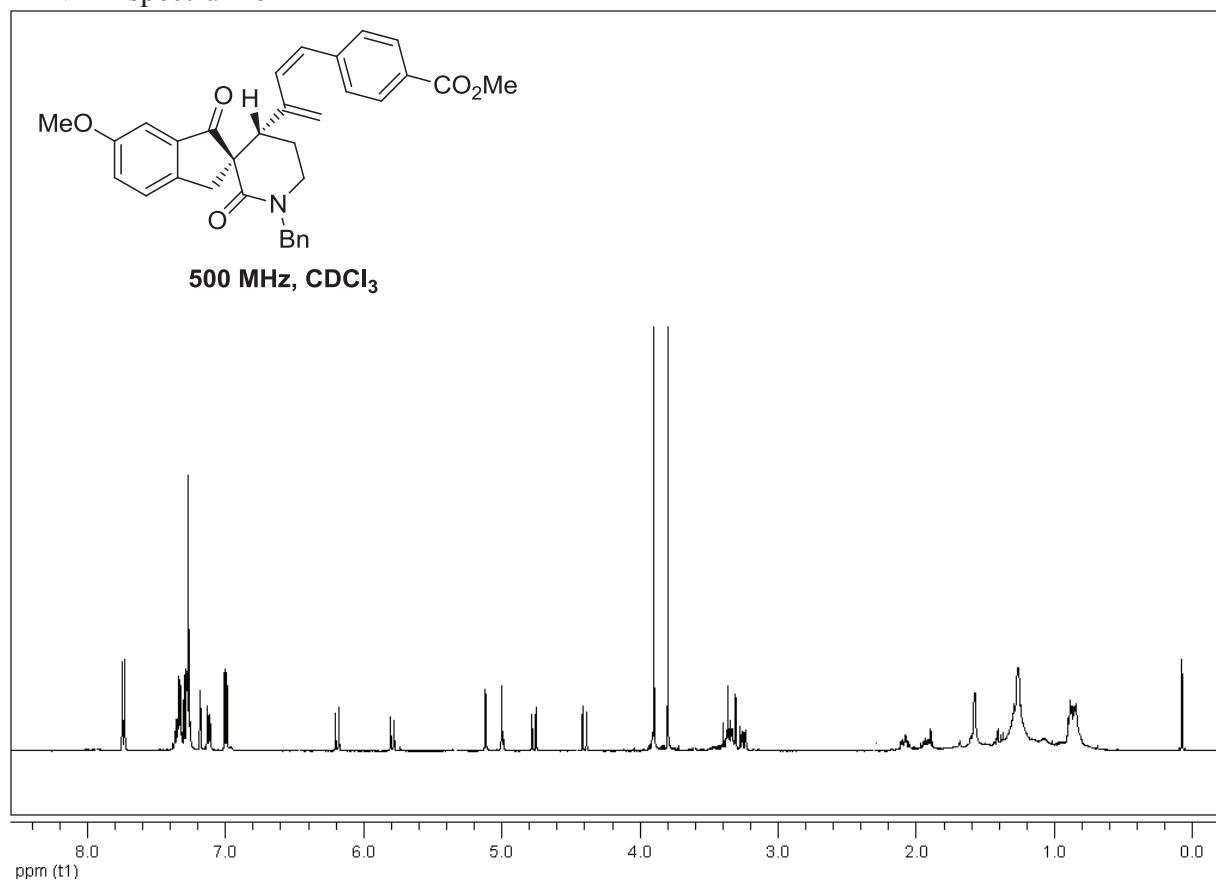

$^{13}\text{C}$  NMR spectrum of **4k**

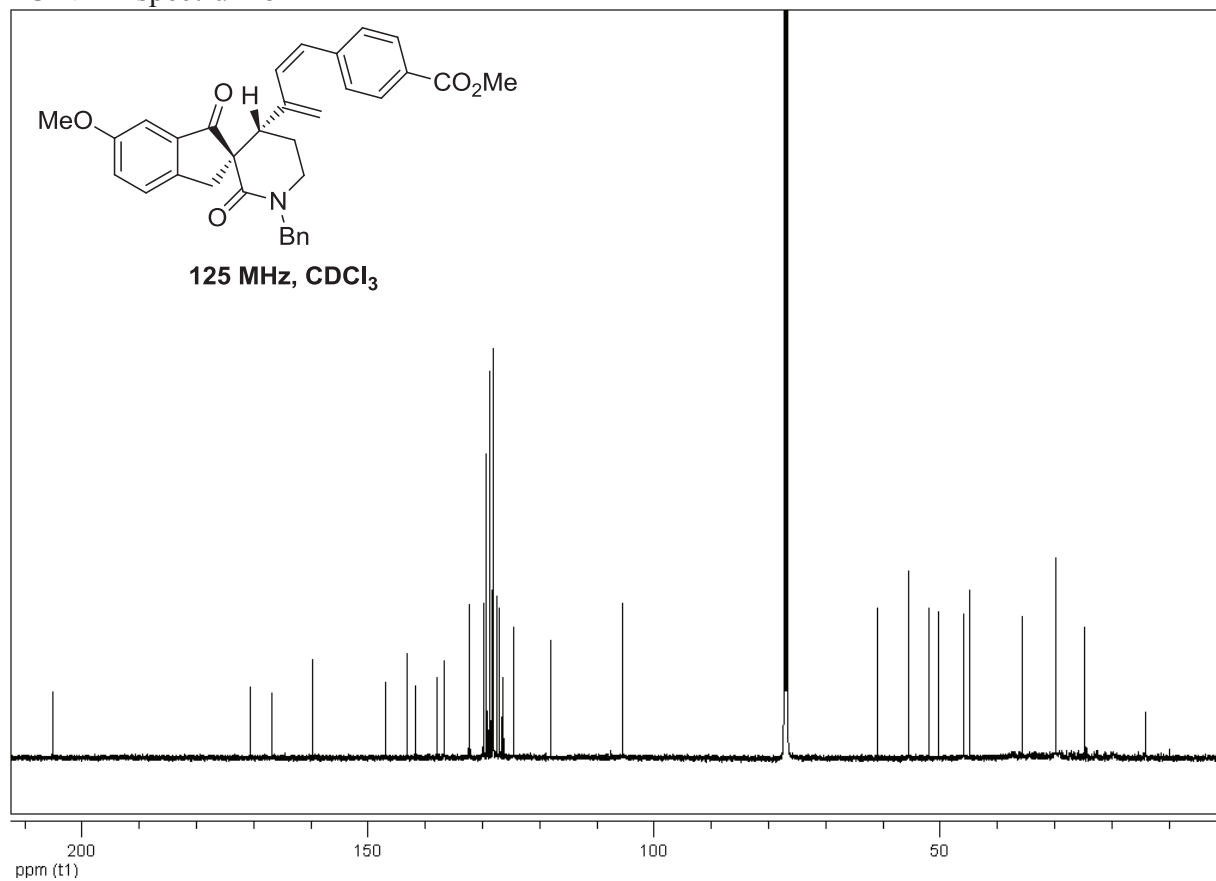



4k HPLC: Chiralcel AD; hexane/isopropanol 70:30; 1.0 mL/min

Racemic

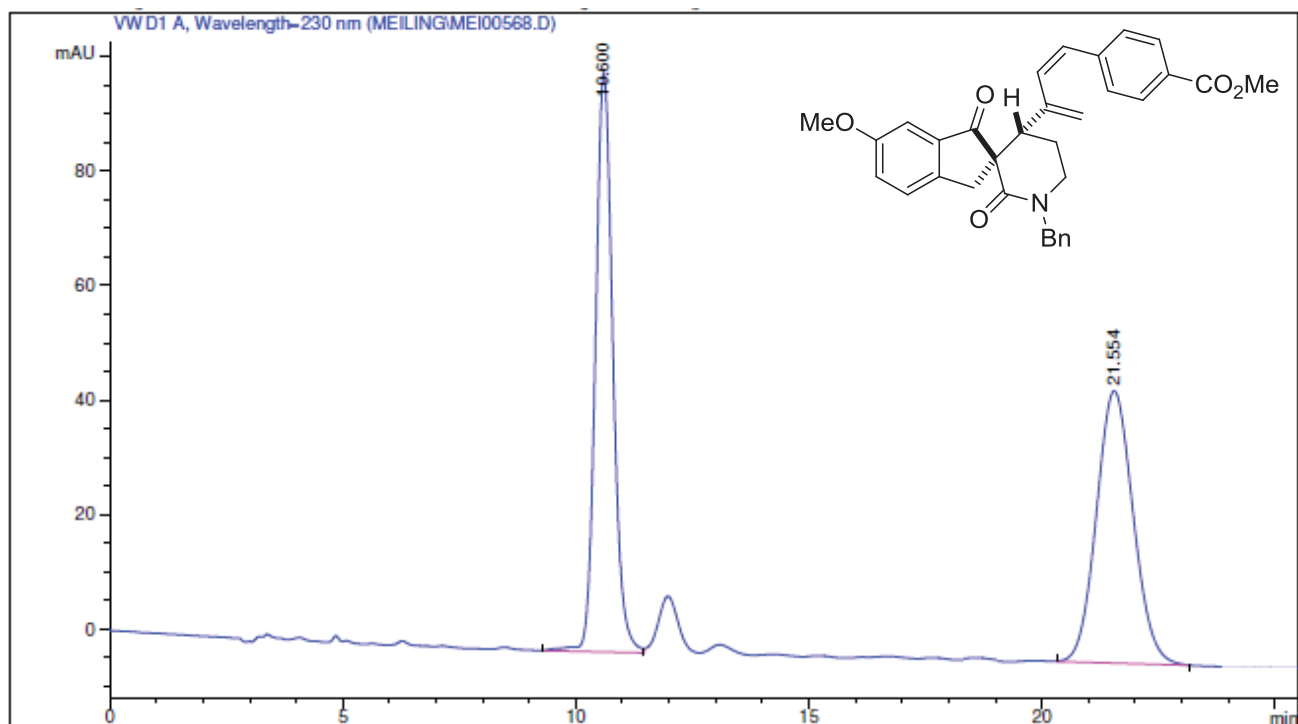

Area Percent Report

Sorted By : Signal  
Multiplier : 1.0000  
Dilution : 1.0000  
Use Multiplier & Dilution Factor with ISTDs

Signal 1: VWD1 A, Wavelength-230 nm

| Peak # | RetTime [min] | Type | Width [min] | Area [mAU*s] | Height [mAU] | Area %  |
|--------|---------------|------|-------------|--------------|--------------|---------|
| 1      | 10.600        | BB   | 0.3945      | 2634.79565   | 101.28857    | 50.2120 |
| 2      | 21.554        | BB   | 0.6805      | 2612.54712   | 47.58736     | 49.7880 |

Totals : 5247.34277 148.87593

Results obtained with enhanced integrator!

\*\*\* End of Report \*\*\*

4k HPLC: Chiralcel AD; hexane/isopropanol 70:30; 1.0 mL/min

Enantioenriched

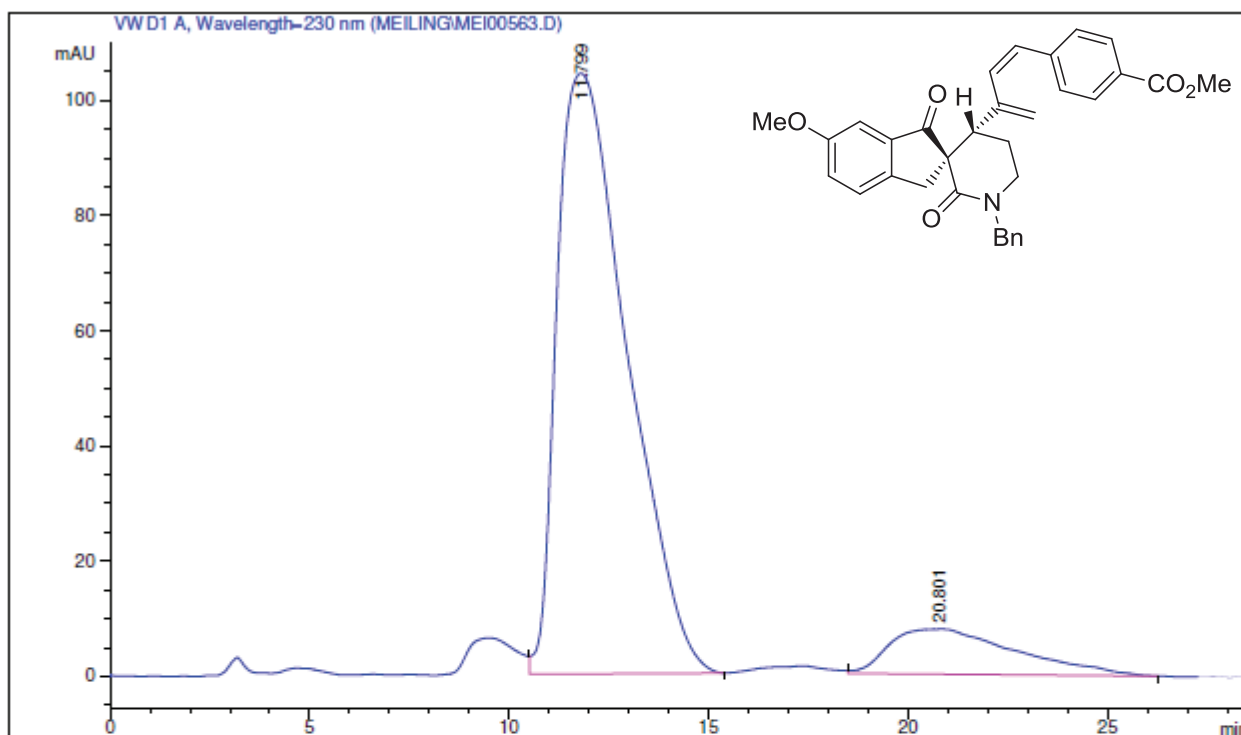

Area Percent Report

Sorted By : Signal  
Multiplier : 1.0000  
Dilution : 1.0000  
Use Multiplier & Dilution Factor with ISTDs

Signal 1: VWD1 A, Wavelength-230 nm

| Peak # | RetTime [min] | Type | Width [min] | Area [mAU*s] | Height [mAU] | Area %  |
|--------|---------------|------|-------------|--------------|--------------|---------|
| 1      | 11.799        | VP   | 1.8634      | 1.27633e4    | 104.32079    | 87.9747 |
| 2      | 20.801        | VB   | 2.5974      | 1744.61340   | 7.86037      | 12.0253 |

Totals : 1.45079e4 112.18116

Results obtained with enhanced integrator!

\*\*\* End of Report \*\*\*

$^1\text{H}$  NMR spectrum of **41**

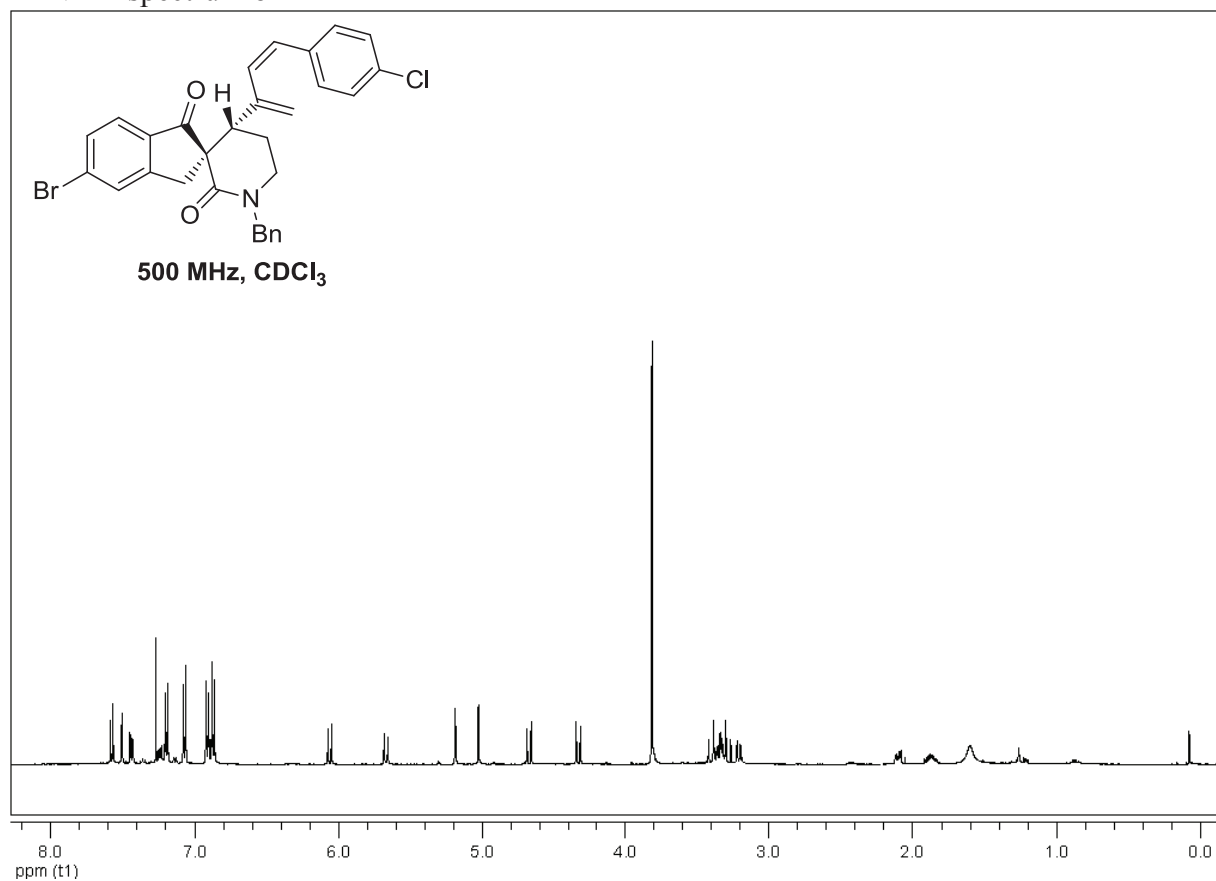

$^{13}\text{C}$  NMR spectrum of **41**

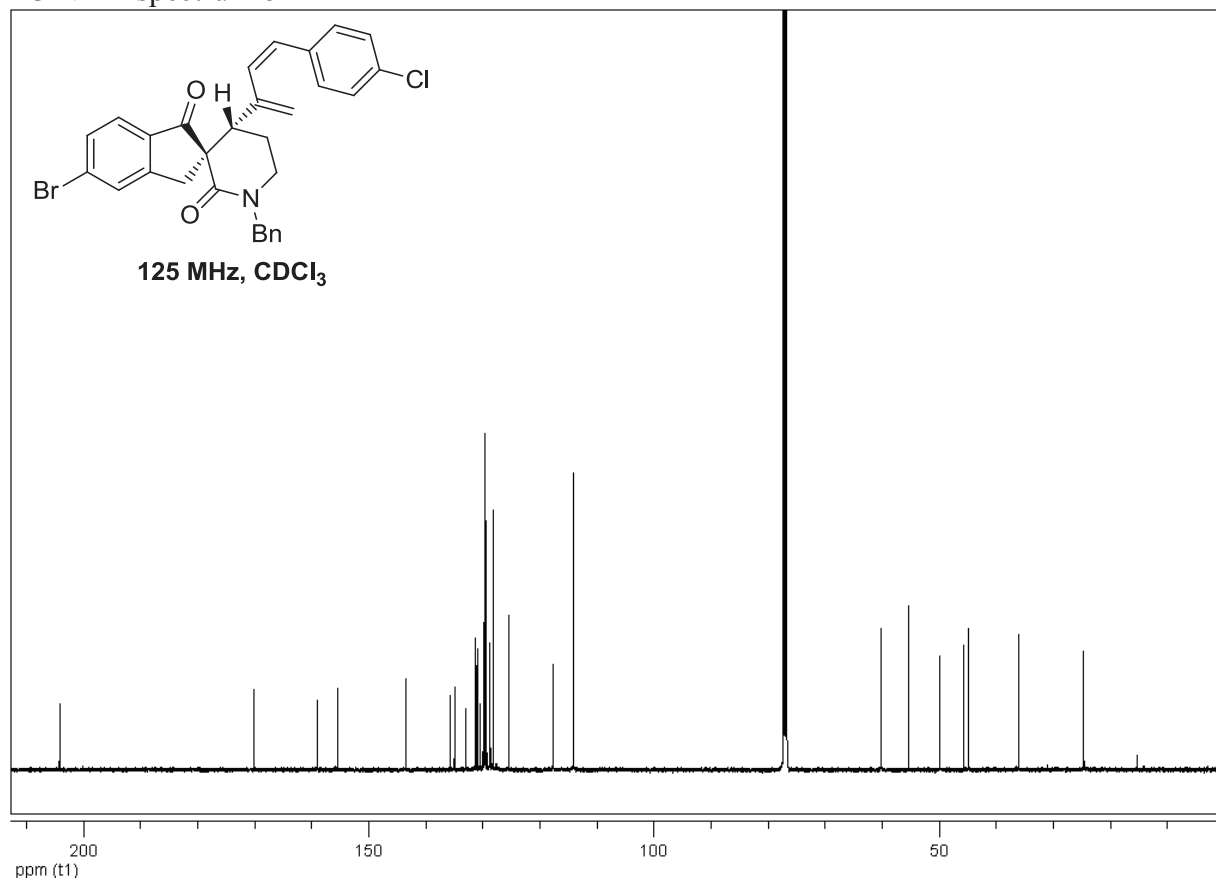

41 HPLC: Chiralcel AD; hexane/isopropanol 70:30; 1.0 mL/min

Racemic

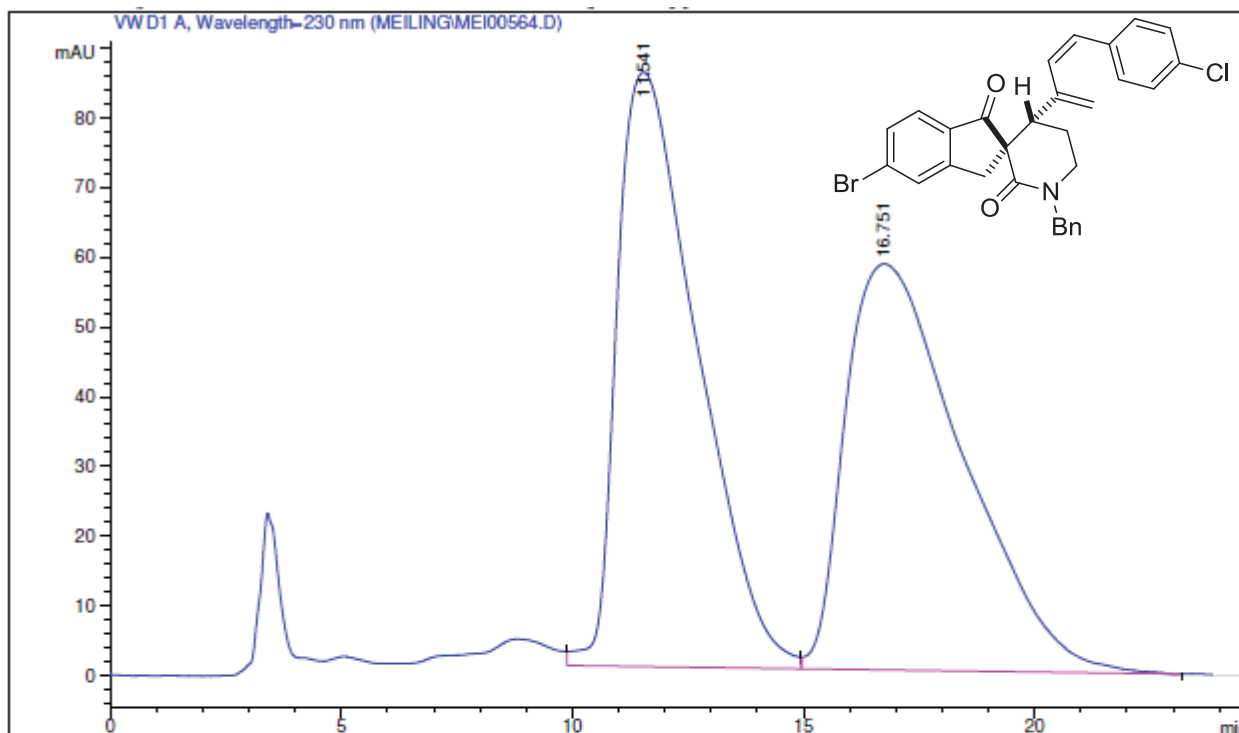

-----  
Area Percent Report  
-----

Sorted By : Signal  
Multiplier : 1.0000  
Dilution : 1.0000  
Use Multiplier & Dilution Factor with ISTDs

Signal 1: VWD1 A, Wavelength=230 nm

| Peak # | RetTime [min] | Type | Width [min] | Area [mAU*s] | Height [mAU] | Area %  |
|--------|---------------|------|-------------|--------------|--------------|---------|
| 1      | 11.541        | VV   | 1.7703      | 1.03022e4    | 85.22606     | 50.0227 |
| 2      | 16.751        | VP   | 2.4068      | 1.02928e4    | 58.21448     | 49.9773 |

Totals : 2.05950e4 143.44054

Results obtained with enhanced integrator!

-----  
\*\*\* End of Report \*\*\*

41 HPLC: Chiralcel AD; hexane/isopropanol 70:30; 1.0 mL/min

Enantioenriched

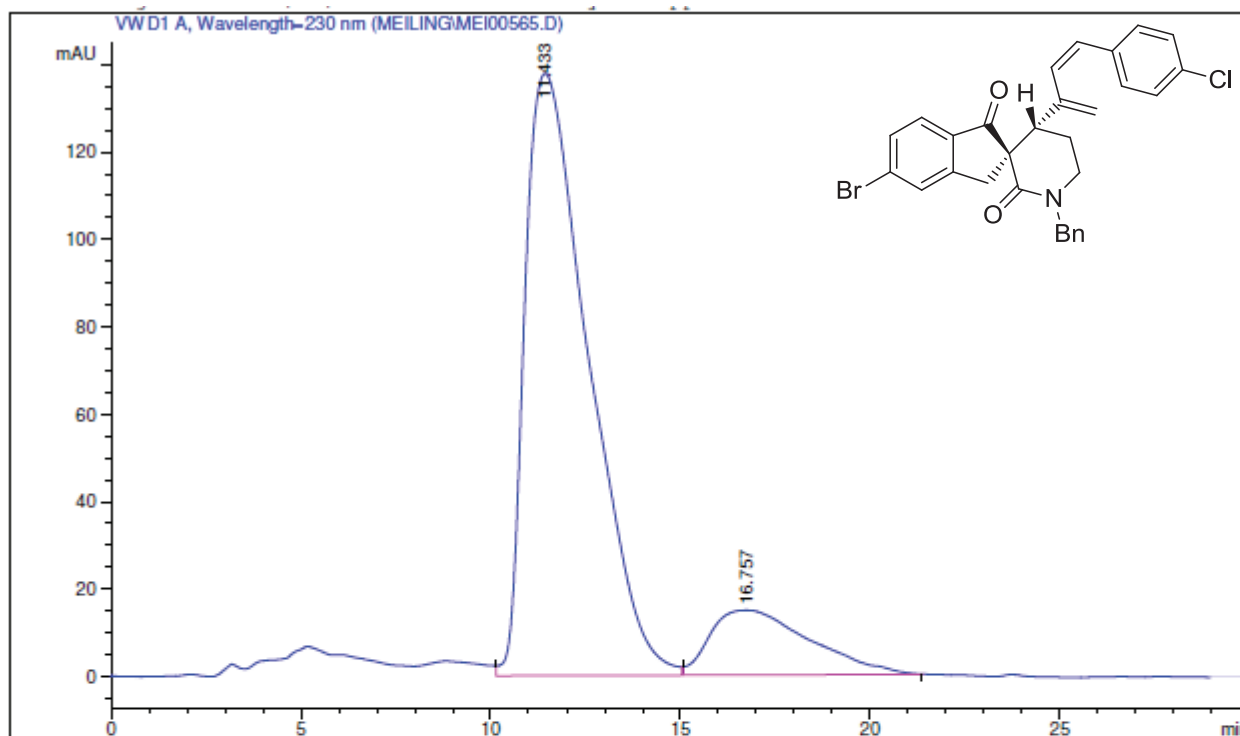

-----  
Area Percent Report  
-----

Sorted By : Signal  
Multiplier : 1.0000  
Dilution : 1.0000  
Use Multiplier & Dilution Factor with ISTDs

Signal 1: VWD1 A, Wavelength=230 nm

| Peak # | RetTime [min] | Type | Width [min] | Area [mAU*s] | Height [mAU] | Area %  |
|--------|---------------|------|-------------|--------------|--------------|---------|
| 1      | 11.433        | VB   | 1.7444      | 1.60339e4    | 137.70506    | 85.5557 |
| 2      | 16.757        | BB   | 2.1423      | 2706.98291   | 14.81083     | 14.4443 |

Totals : 1.87409e4 152.51589

Results obtained with enhanced integrator!

-----  
\*\*\* End of Report \*\*\*

$^1\text{H}$  NMR spectrum of **4m**

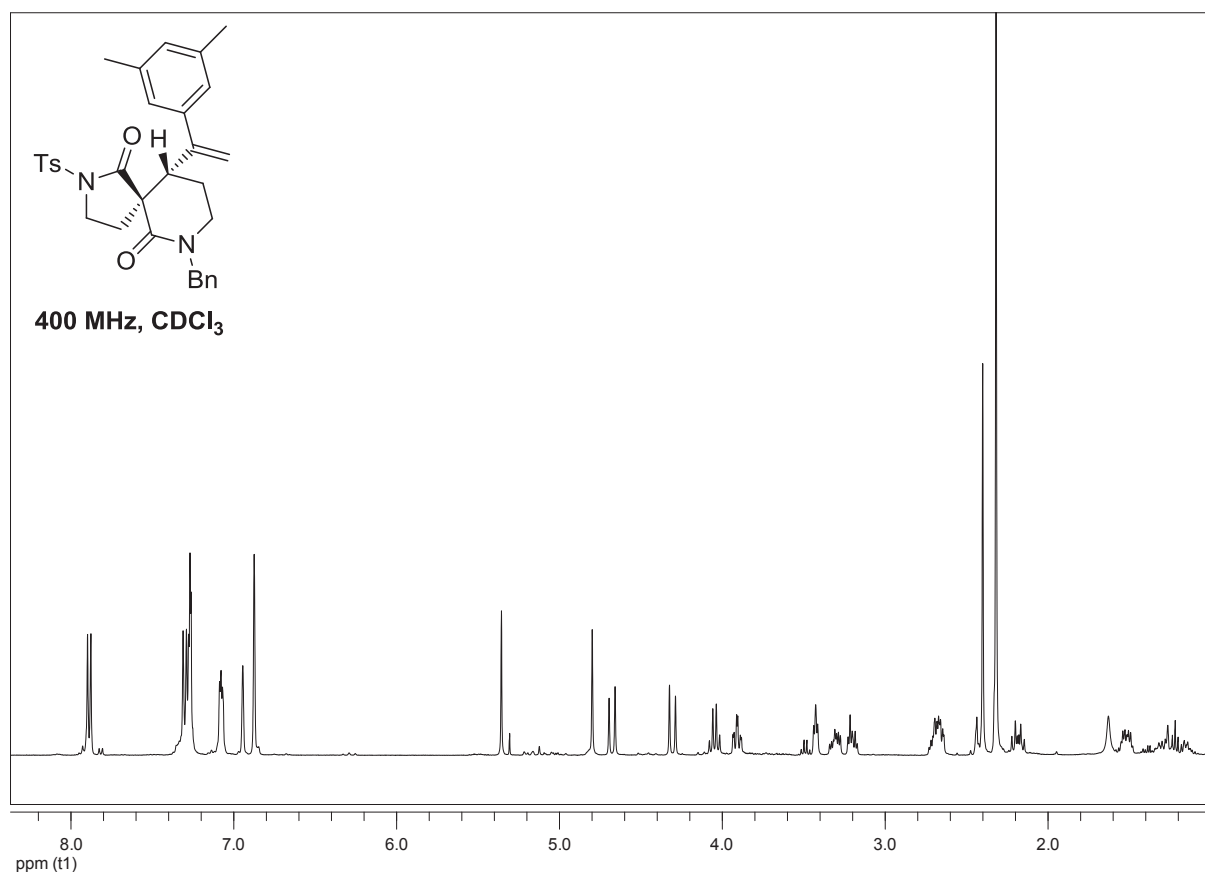

$^{13}\text{C}$  NMR spectrum of **4m**

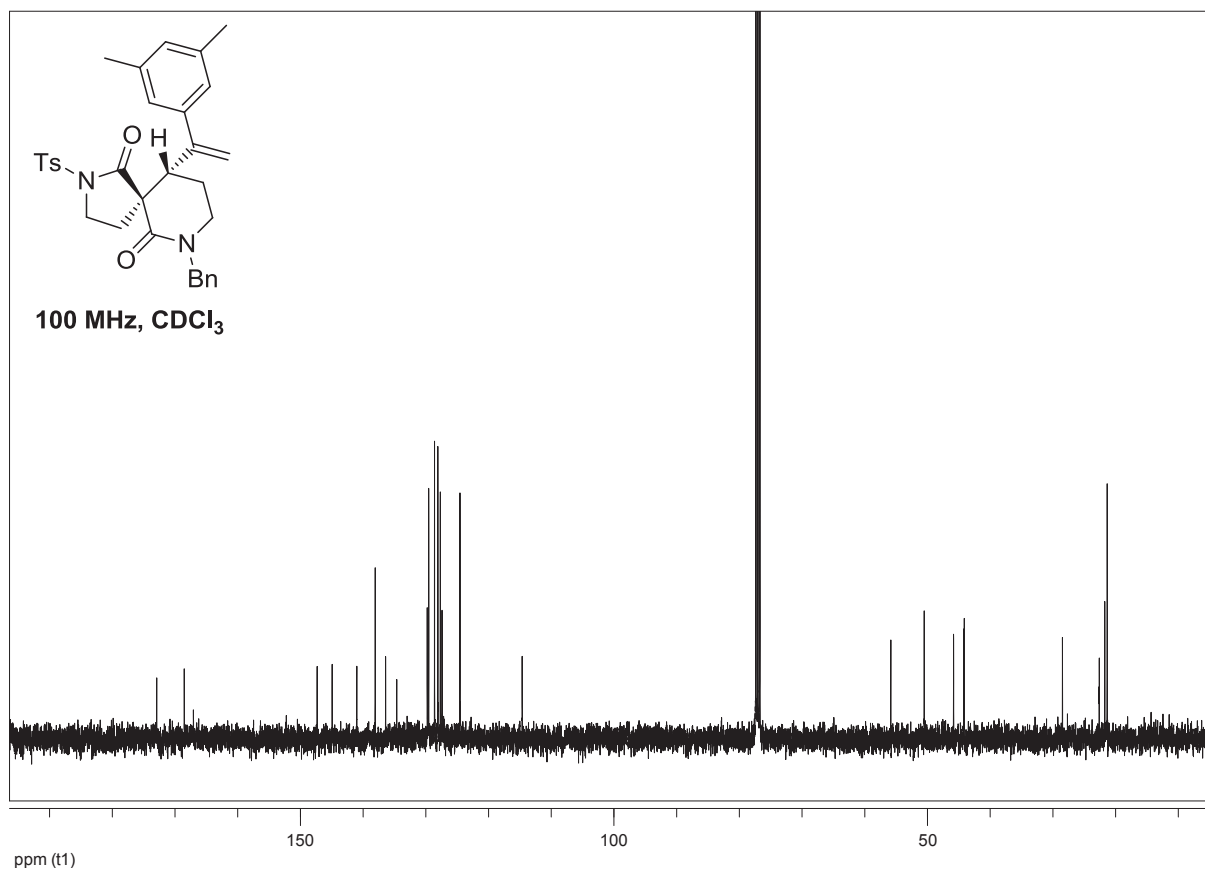

4m HPLC: Chiralcel AD; hexane/isopropanol 60:40; 1.0 mL/min

Racemic

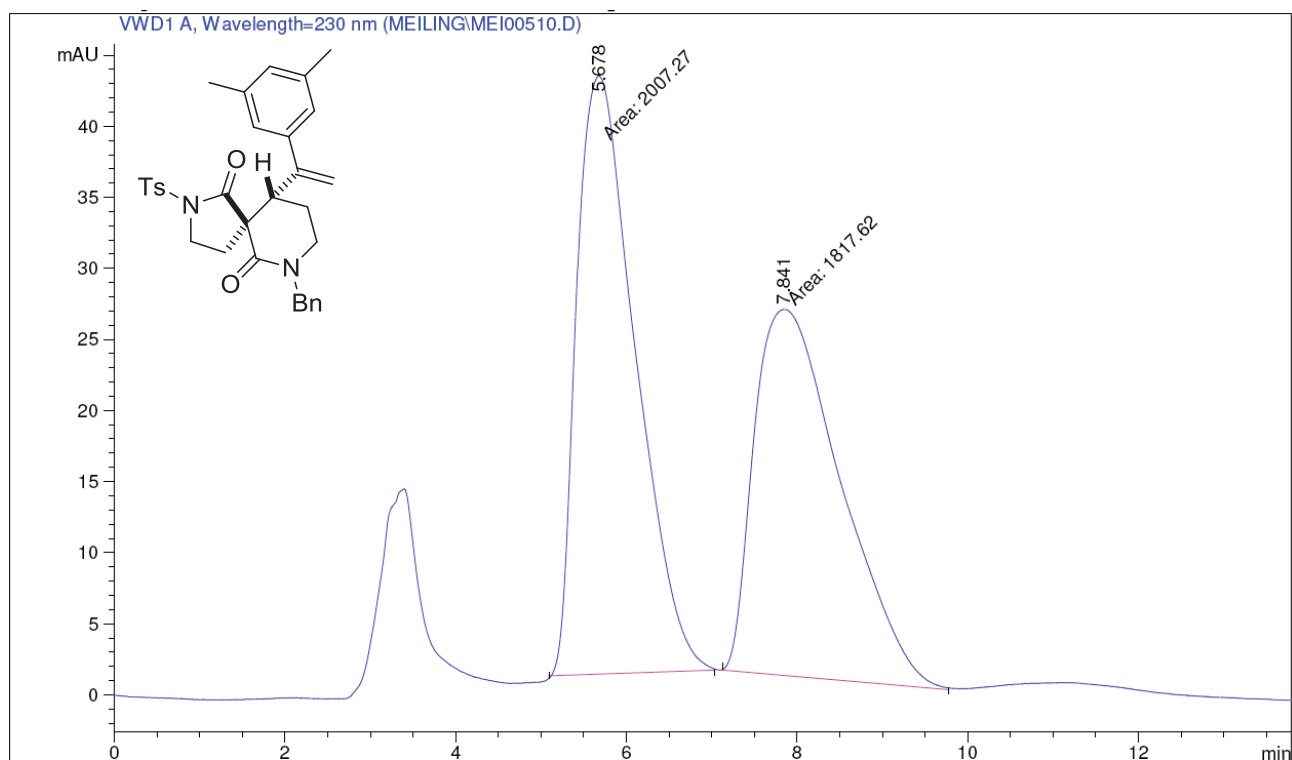

=====  
Area Percent Report  
=====

Sorted By : Signal  
Multiplier : 1.0000  
Dilution : 1.0000  
Use Multiplier & Dilution Factor with ISTDs

Signal 1: VWD1 A, Wavelength=230 nm

| Peak # | RetTime [min] | Type | Width [min] | Area [mAU*s] | Height [mAU] | Area %  |
|--------|---------------|------|-------------|--------------|--------------|---------|
| 1      | 5.678         | MM   | 0.7947      | 2007.27356   | 42.09686     | 52.4792 |
| 2      | 7.841         | MM   | 1.1759      | 1817.62085   | 25.76171     | 47.5208 |

Totals : 3824.89441 67.85857

Results obtained with enhanced integrator!

=====  
\*\*\* End of Report \*\*\*

**4m** HPLC: Chiralcel AD; hexane/isopropanol 60:40; 1.0 mL/min

Enantioenriched

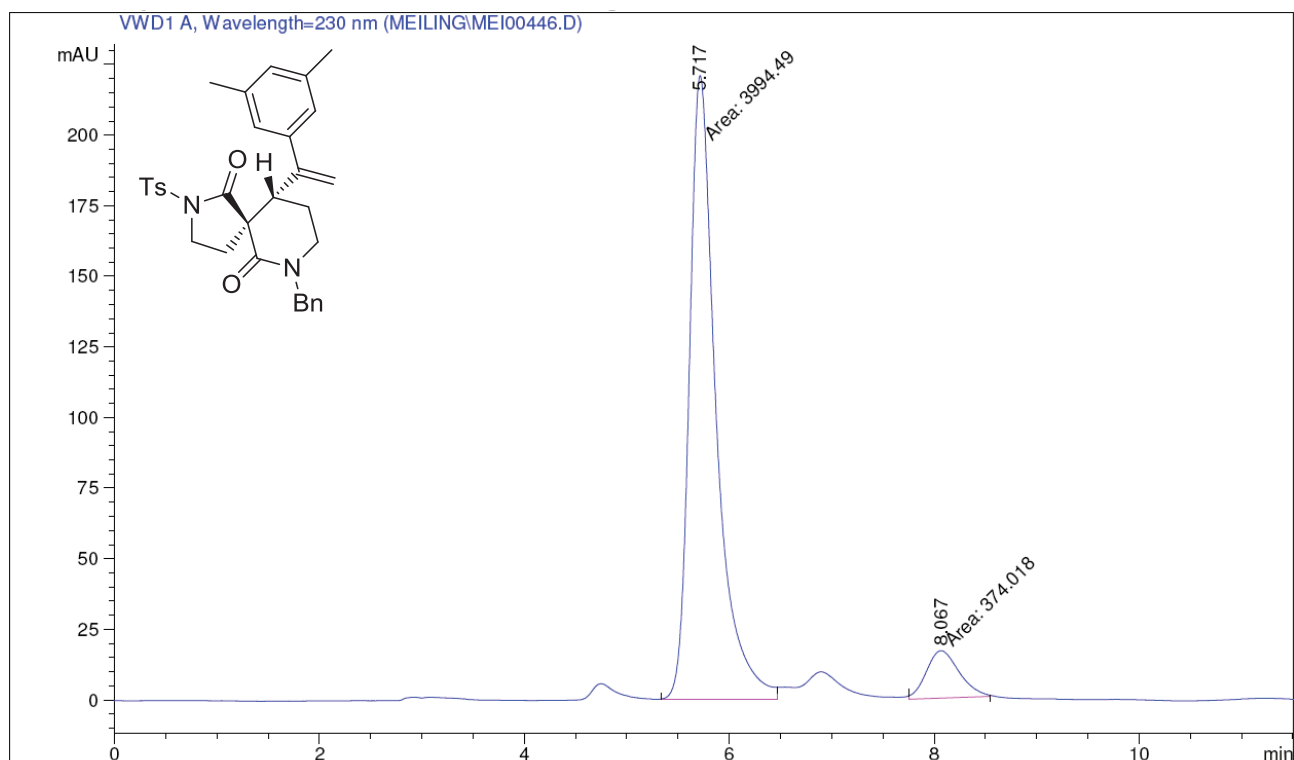

=====  
Area Percent Report  
=====

Sorted By : Signal  
Multiplier : 1.0000  
Dilution : 1.0000  
Use Multiplier & Dilution Factor with ISTDs

Signal 1: VWD1 A, Wavelength=230 nm

| Peak # | RetTime [min] | Type | Width [min] | Area [mAU*s] | Height [mAU] | Area %  |
|--------|---------------|------|-------------|--------------|--------------|---------|
| 1      | 5.717         | MM   | 0.3015      | 3994.48901   | 220.79837    | 91.4383 |
| 2      | 8.067         | MM   | 0.3722      | 374.01828    | 16.74965     | 8.5617  |

Totals : 4368.50729 237.54802

Results obtained with enhanced integrator!

=====  
\*\*\* End of Report \*\*\*



$^1\text{H}$  NMR spectrum of **4b'**

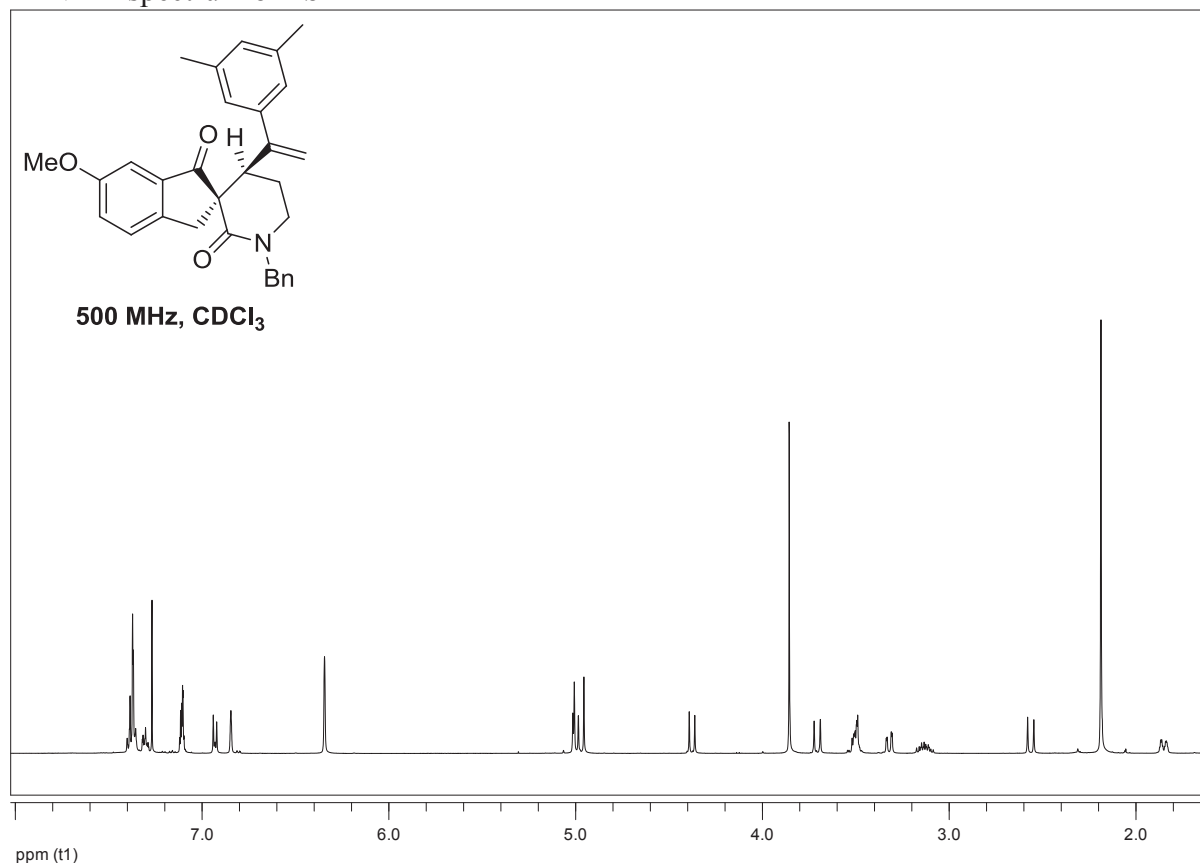

$^{13}\text{C}$  NMR spectrum of **4b'**

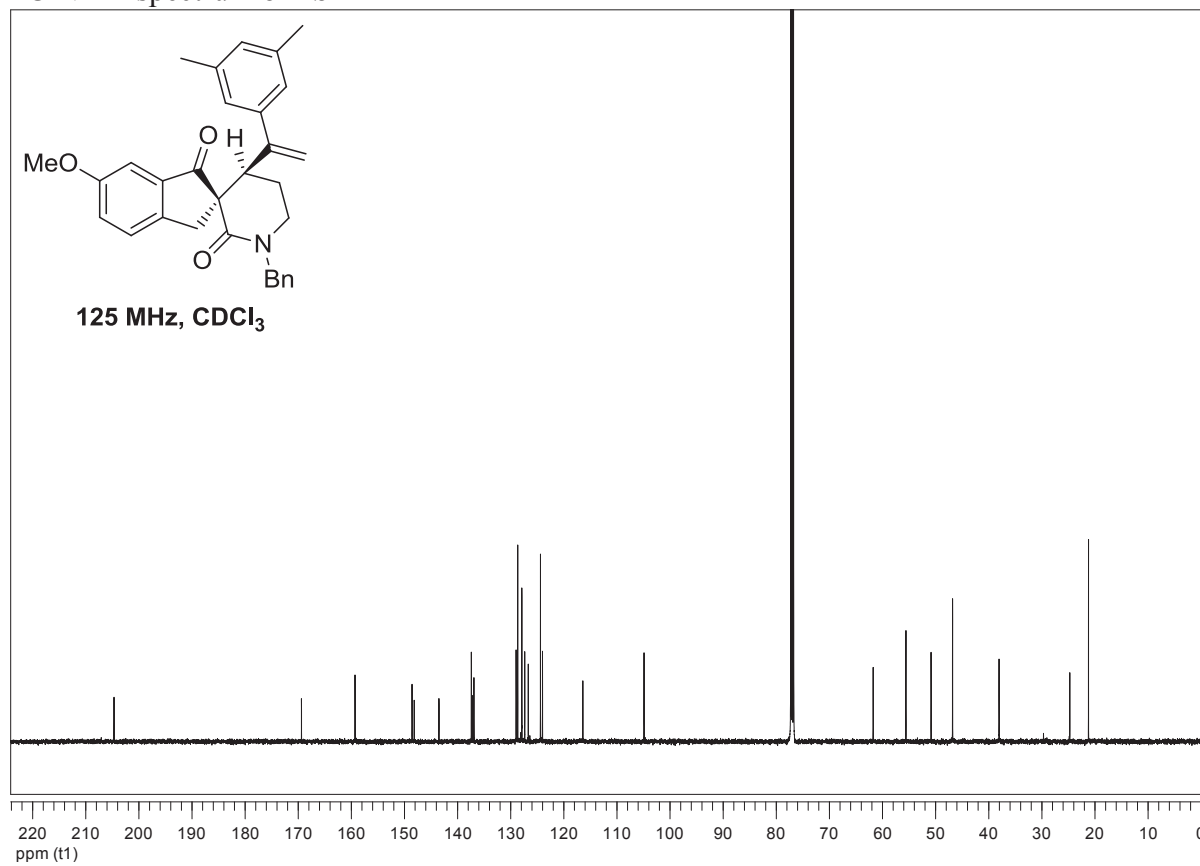

## 9. Relative stereochemistry assignment of 4b and 4b' using NOESY analysis

NOSEY of **4b** (500 MHz, CDCl<sub>3</sub>)

 = strong interaction  
 = weak interaction

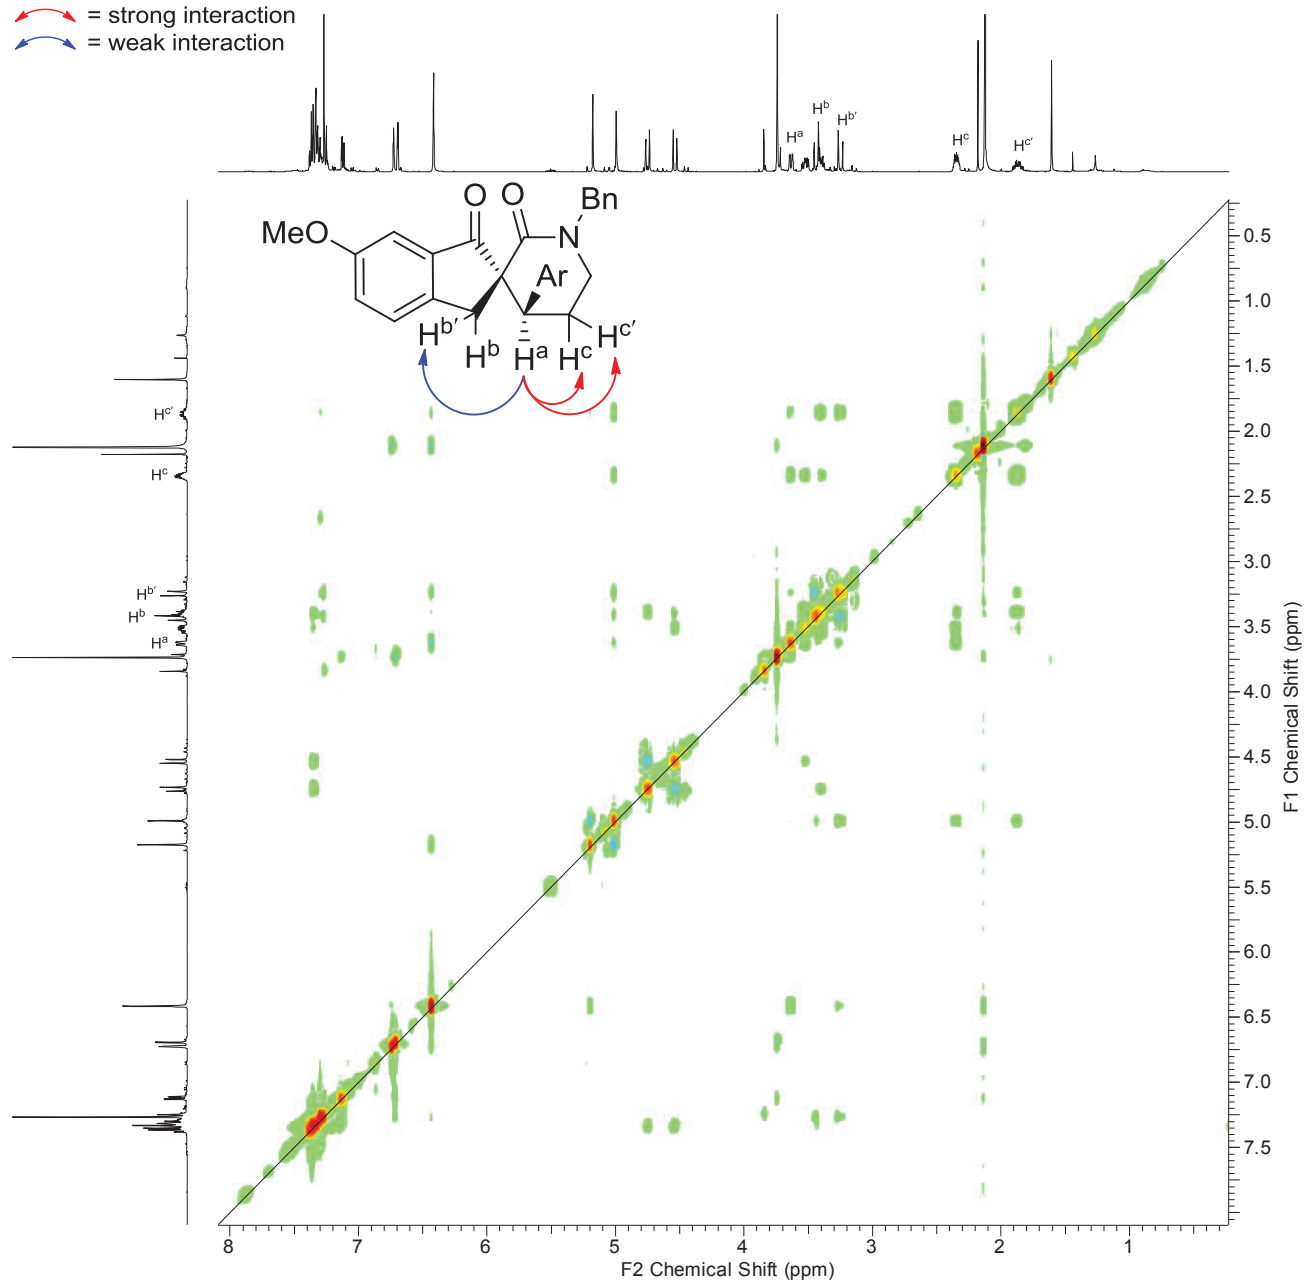

NOESY of **4b** (500 MHz, CDCl<sub>3</sub>)

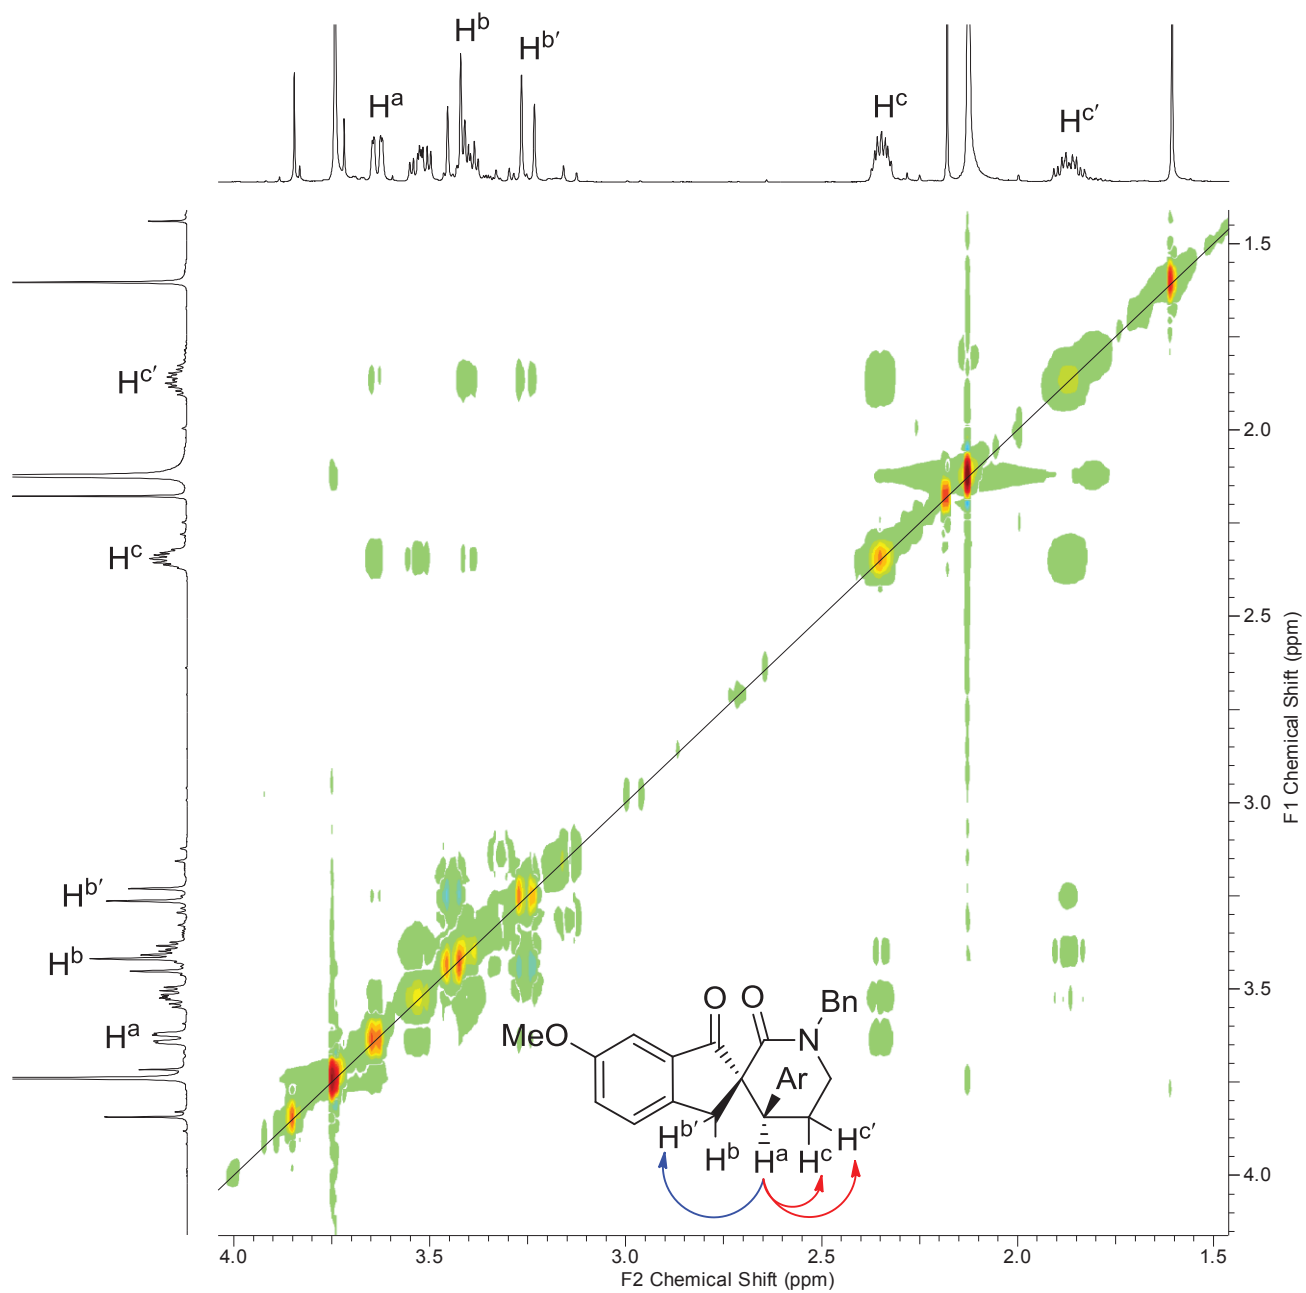

NOESY of **4b'** (500 MHz, CDCl<sub>3</sub>)

 = strong interaction  
 = weak interaction

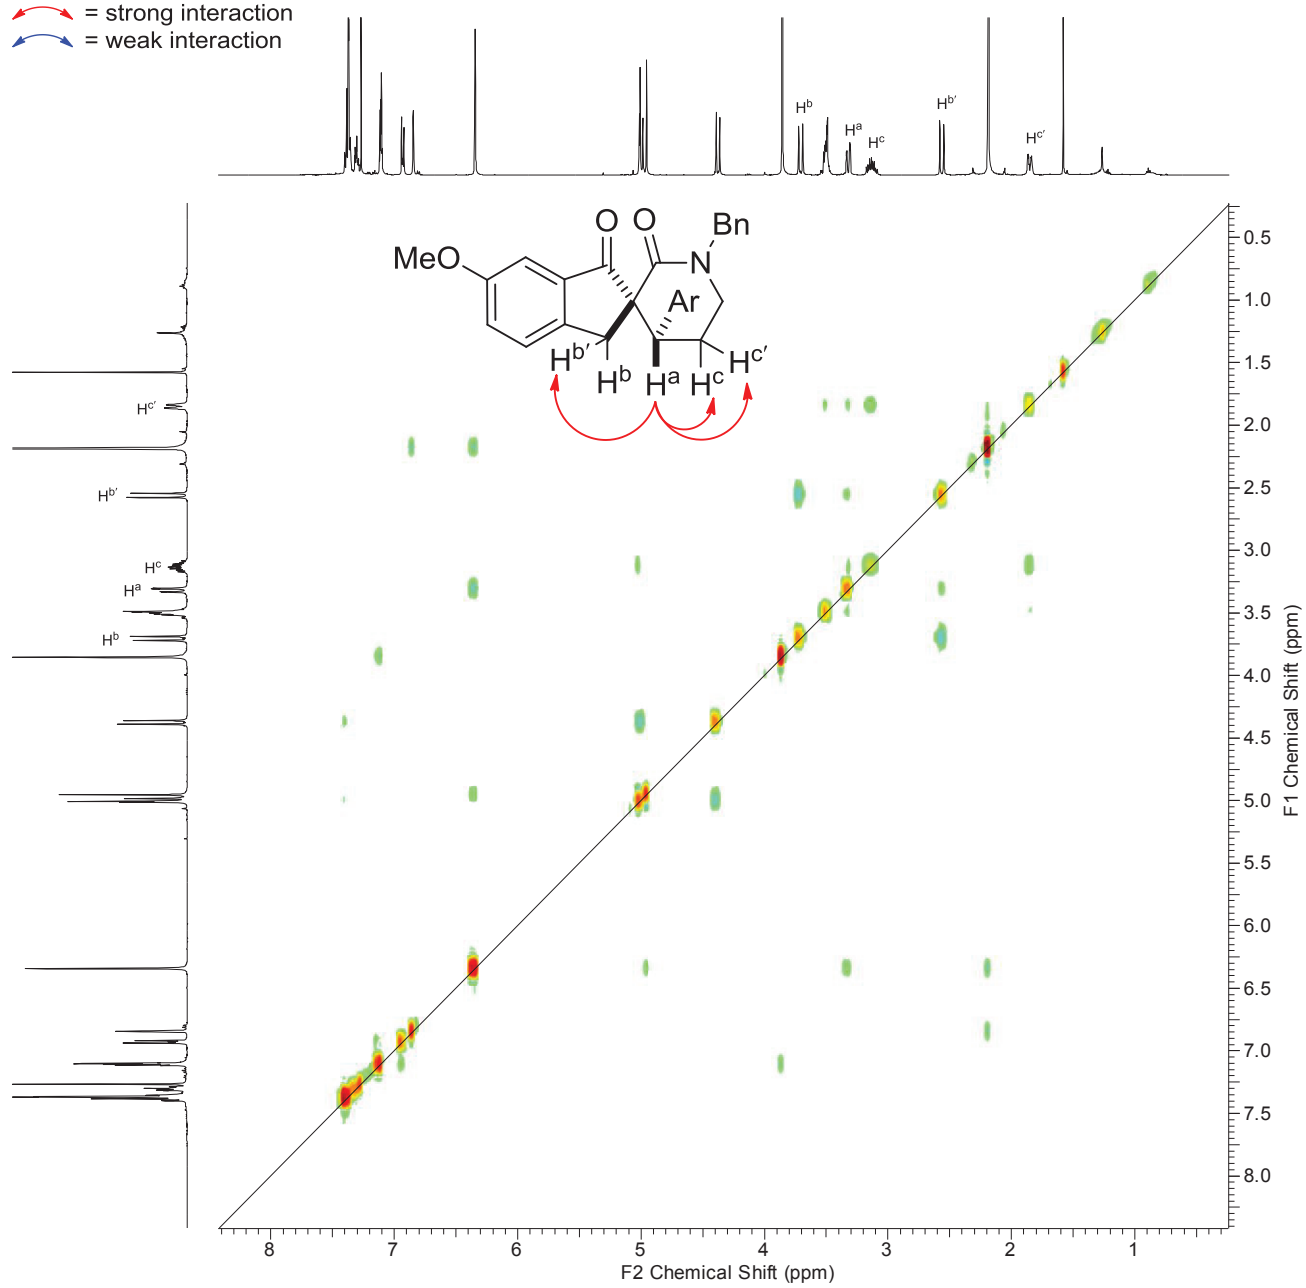

NOESY of **4b'** (500 MHz, CDCl<sub>3</sub>)

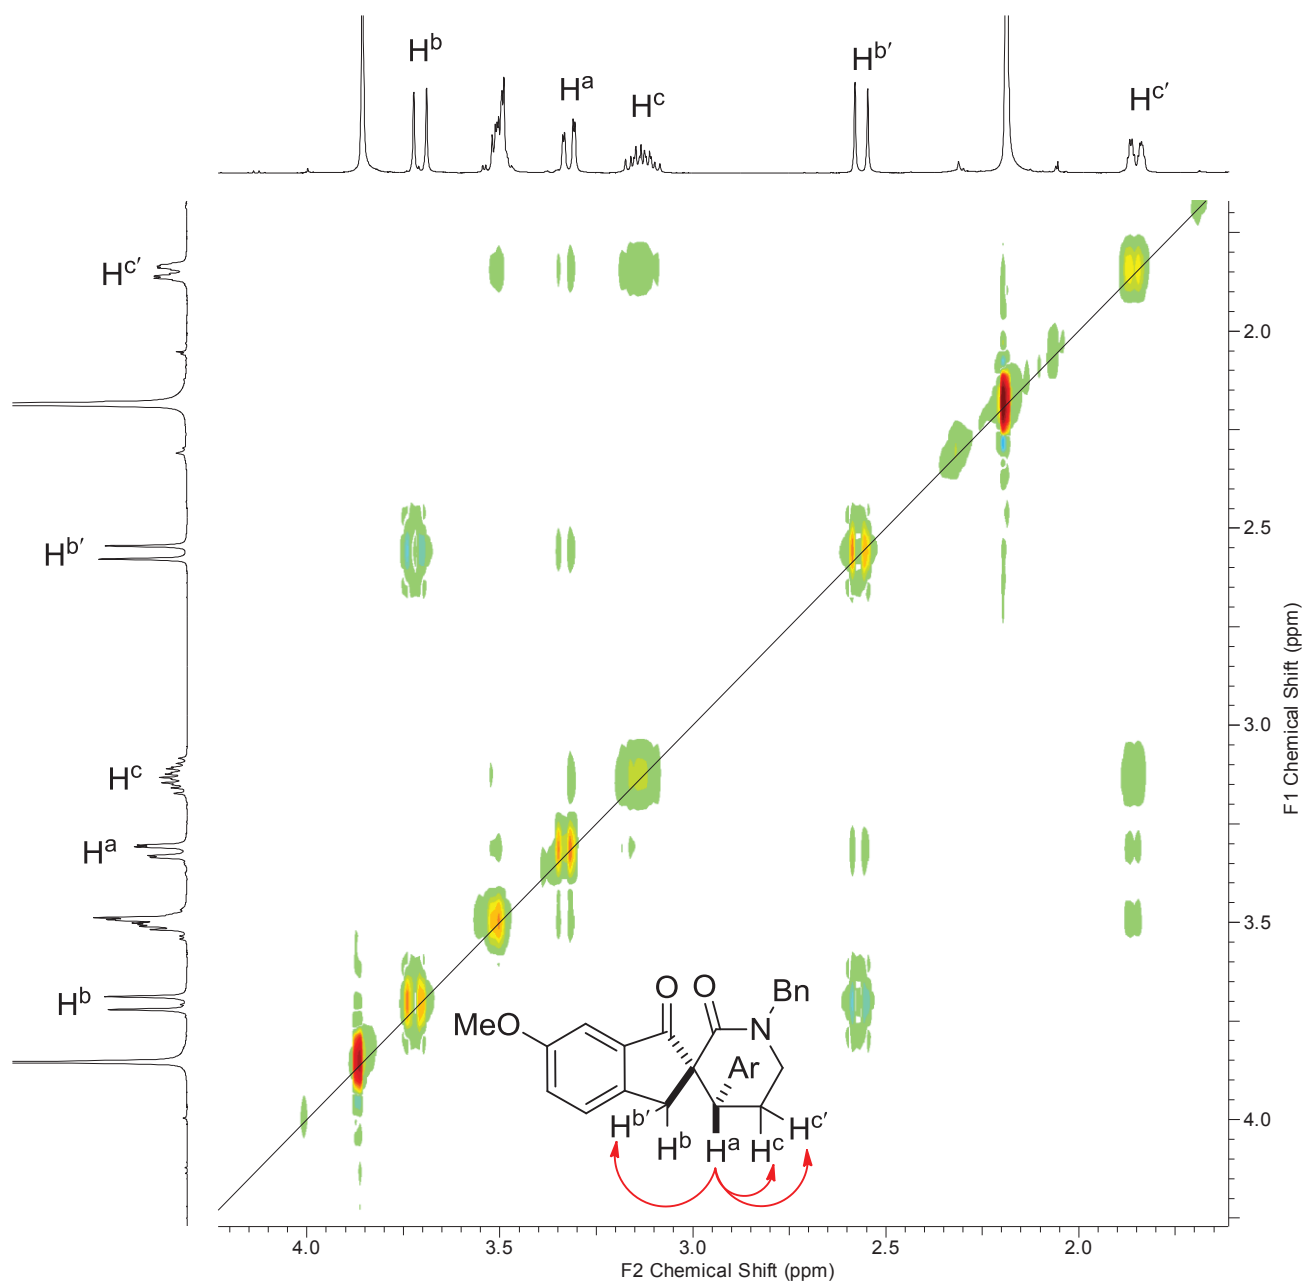

## 10. Determination of the Absolute Configuration of **4b** using Vibrational Circular Dichroism.

### *Experimental Details*

Infrared and VCD spectra of the compound under study was obtained using a BioTools ChiralIR-2X dual PEM spectrometer, as installed at the European Centre for Chirality.<sup>[1]</sup> A 0.16M solution of the sample dissolved in CDCl<sub>3</sub> was used in combination with a 100 micron liquid cell equipped with BaF<sub>2</sub> windows. Baseline corrections were obtained by using the spectra of a pure solvent. For the solution and the pure solvent, 60000 scans were recorded at 4 cm<sup>-1</sup> resolution and averaged.

### *Computational details*

The experimental spectra obtained were compared with predicted spectra derived for the (2*R*,4'*S*) stereoisomer. Conformational analyses were performed using the MMFF94S, MMFF and SYBYL force fields. The geometries derived from the molecular mechanics simulations were optimized at the B3LYP/6-31G\*, using a SCRF model to account for solvent polarization. Gaussian09<sup>[2]</sup> was used for all DFT calculations. Boltzmann weighted IR and VCD spectra were obtained by assuming Lorentzian band profiles with a FWHH of 10 cm<sup>-1</sup>. The Boltzmann populations used were based on the standard enthalpies obtained. The number of unique conformations used to calculate the Boltzmann weighted IR and VCD spectra was 31. The two most abundant conformations, with a predicted relative population of 27.5 and 12.7%, are:

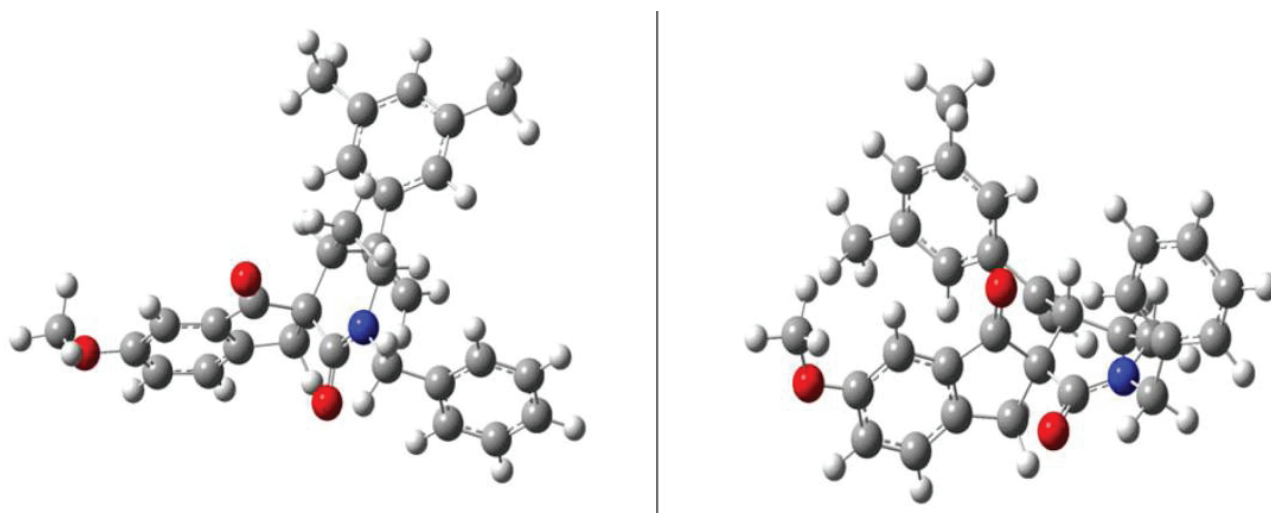

### *Absolute Configuration*

The experimental IR and VCD spectra and the predicted spectra of the (2*R*,4'*S*) stereoisomer obtained for **4b** are shown. The calculated data, based upon a uniform scaling factor of 0.968 for the frequencies, neatly reproduces the characteristic patterns in IR and VCD. The agreement between experiment and theory confirms the proposed (2*R*,4'*S*) stereochemistry.

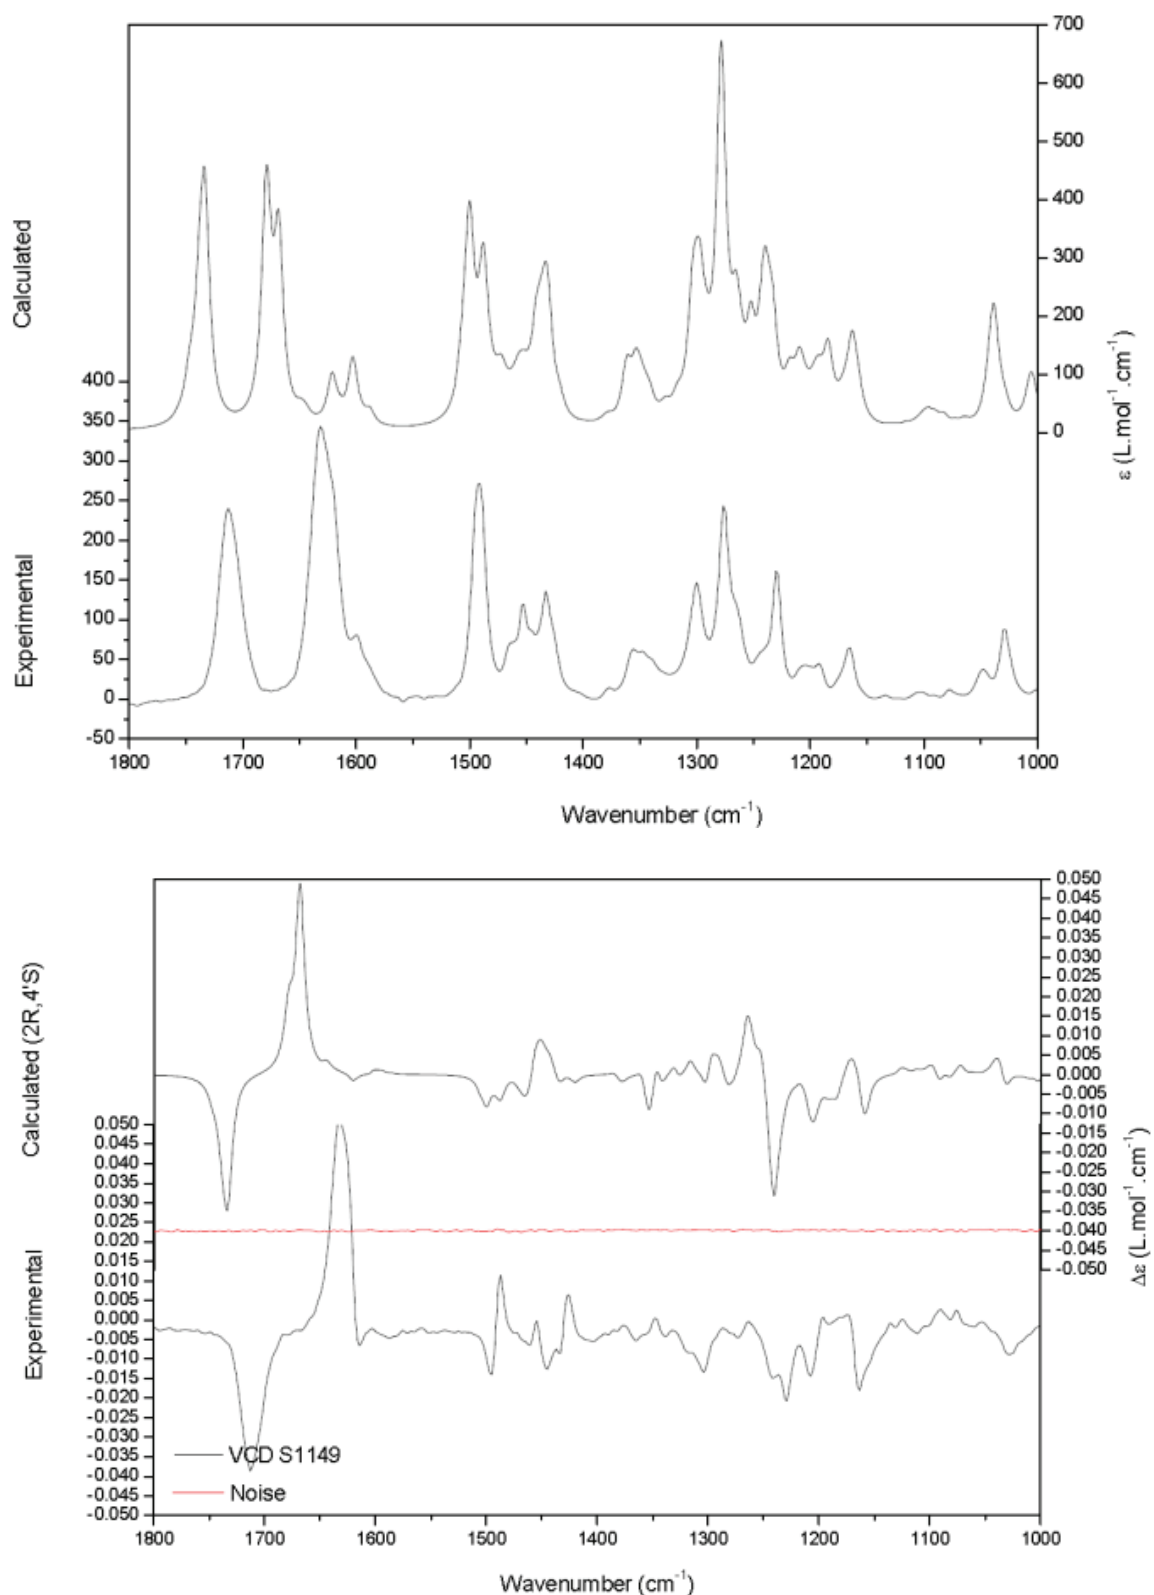

Numerical data confirming the assignment of the absolute configuration as (2*R*,4'*S*) was obtained using the CompareVOA algorithm as described in ref.<sup>[3]</sup> The IR similarity index, based upon a scaling factor of the calculated frequencies of 0.968, was determined to be 95.2%. The corresponding values for the VCD spectra obtained for the (2*R*,4'*S*) and (2*S*,4'*R*) diastereoisomers were 62.2% and 8.2%,

respectively, and lead to a enantiomeric similarity index  $\Delta$  equal to 54%. The localization of the current assignment with respect to the database of correct and incorrect assignments supporting the compareVOA algorithm is shown below. The confidence level for the assignment is 99%.

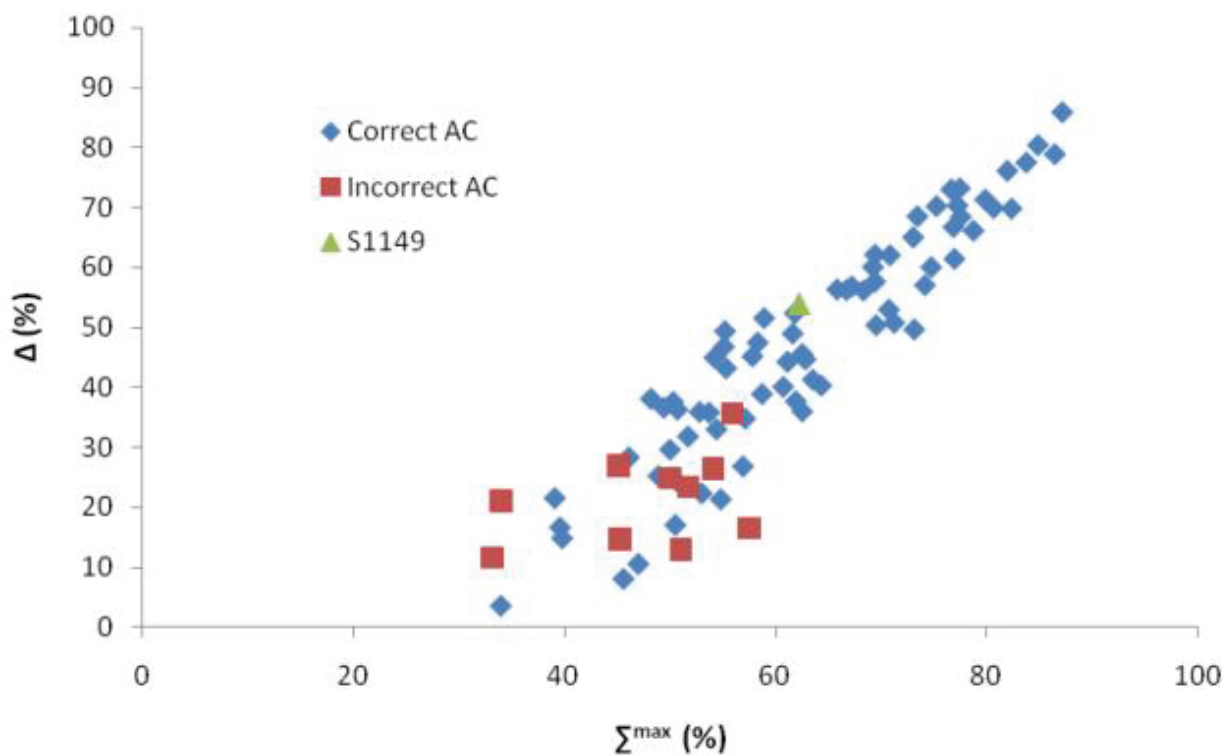

## References:

- [1] European Centre for Chirality, [www.chiralitycentre.eu](http://www.chiralitycentre.eu)
- [2] Gaussian 09, Revision C.01, M. J. Frisch, G. W. Trucks, H. B. Schlegel, G. E. Scuseria, M. A. Robb, J. R. Cheeseman, G. Scalmani, V. Barone, B. Mennucci, G. A. Petersson, H. Nakatsuji, M. Caricato, X. Li, H. P. Hratchian, A. F. Izmaylov, J. Bloino, G. Zheng, J. L. Sonnenberg, M. Hada, M. Ehara, K. Toyota, R. Fukuda, J. Hasegawa, M. Ishida, T. Nakajima, Y. Honda, O. Kitao, H. Nakai, T. Vreven, J. A. Montgomery, Jr., J. E. Peralta, F. Ogliaro, M. Bearpark, J. J. Heyd, E. Brothers, K. N. Kudin, V. N. Staroverov, R. Kobayashi, J. Normand, K. Raghavachari, A. Rendell, J. C. Burant, S. S. Iyengar, J. Tomasi, M. Cossi, N. Rega, J. M. Millam, M. Klene, J. E. Knox, J. B. Cross, V. Bakken, C. Adamo, J. Jaramillo, R. Gomperts, R. E. Stratmann, O. Yazyev, A. J. Austin, R. Cammi, C. Pomelli, J. W. Ochterski, R. L. Martin, K. Morokuma, V. G. Zakrzewski, G. A. Voth, P. Salvador, J. J. Dannenberg, S. Dapprich, A. D. Daniels, Ö. Farkas, J. B. Foresman, J. V. Ortiz, J. Cioslowski, and D. J. Fox, Gaussian, Inc., Wallingford CT, 2009.
- [3] E. Debie, E. De Gussem, R.K. Dukor, W. Herrebout, L.A. Nafie, P. Bultinck, *ChemPhysChem* **2011**, *12*, 1542.
